# Supplementary material for: Unforgettable: Optogenetic Stimulation of Prelimbic Pyramidal Neurons Maintains Fear Memories by Modulating Amygdala Pyramidal Neuron Transcriptome
Source: Preprints.org preprint supplement (doi:10.20944/preprints202012.0252.v1), 2020-12-10
Supplement: Supplementary file 1 [file supplementary]

## Sheet: Summary
Sheet name	Content
1	Differentially Expressed Genes - OPTO FEAR vs SHAM FEAR
2	Differentially Expressed Genes - OPTO NOT FEAR vs SHAM NOT FEAR
3	Differentially Expressed Genes - OPTO FEAR vs OPTO NOT FEAR
4	Differentially Expressed Genes - SHAM FEAR vs SHAM NOT FEAR
5	Gene Ontology, Biological Process - OPTO FEAR vs SHAM FEAR
6	Gene Ontology, Molecular Function - OPTO FEAR vs SHAM FEAR
7	Gene Ontology, Cellular Component - OPTO FEAR vs SHAM FEAR
8	Gene Ontology, Biological Process - OPTO NOT FEAR vs SHAM NOT FEAR
9	Gene Ontology, Molecular Function - OPTO NOT FEAR vs SHAM NOT FEAR
10	Gene Ontology, Cellular Component - OPTO NOT FEAR vs SHAM NOT FEAR
11	Gene Ontology, Biological Process - OPTO FEAR vs OPTO NOT FEAR
12	Gene Ontology, Molecular Function - OPTO FEAR vs OPTO NOT FEAR
13	Gene Ontology, Cellular Component - OPTO FEAR vs OPTO NOT FEAR
14	Gene Ontology, Biological Process - SHAM FEAR vs SHAM NOT FEAR
15	Gene Ontology, Molecular Function - SHAM FEAR vs SHAM NOT FEAR
16	Gene Ontology, Cellular Component - SHAM FEAR vs SHAM NOT FEAR
17	KEGG - OPTO FEAR vs SHAM FEAR
18	KEGG - OPTO NOT FEAR vs SHAM NOT FEAR
19	KEGG - OPTO FEAR vs OPTO NOT FEAR
20	KEGG - SHAM FEAR vs SHAM NOT FEAR

## Sheet: 1
	OPTO FEAR_mean	SHAM FEAR_mean	theta	prob	log2FC
ENSMUSG00000001323.17	55.2864	306.943	-2.2751	1	-2.47297
ENSMUSG00000005089.15	4664.67	14629	-6.00327	1	-1.64899
ENSMUSG00000005871.15	4679.11	6284.26	-1.85674	1	-0.425507
ENSMUSG00000022099.17	29.9703	173.018	-1.86354	1	-2.52931
ENSMUSG00000022240.10	258.799	873.423	-2.9187	1	-1.75485
ENSMUSG00000024899.7	9.78684	118.375	-2.68367	1	-3.59638
ENSMUSG00000029406.15	32.8803	259.227	-3.15278	1	-2.97892
ENSMUSG00000031517.8	400.153	1764.4	-3.76206	1	-2.14055
ENSMUSG00000034818.17	12.5797	168.182	-2.29147	1	-3.74086
ENSMUSG00000035469.17	1695.87	932.645	2.52063	1	0.862629
ENSMUSG00000036745.15	6265.74	4385.87	2.06814	1	0.514621
ENSMUSG00000037996.17	5216.11	3344.17	3.3543	1	0.641323
ENSMUSG00000038608.15	5888.3	4264.68	2.47681	1	0.465412
ENSMUSG00000040249.15	1014.11	2265.68	-3.1428	1	-1.15973
ENSMUSG00000040907.15	141.333	859.215	-3.37588	1	-2.60392
ENSMUSG00000041773.8	54.2553	356.099	-2.3157	1	-2.71444
ENSMUSG00000048537.16	6845.79	3989.11	4.23032	1	0.779151
ENSMUSG00000053024.14	4789.95	2965.42	2.84798	1	0.691772
ENSMUSG00000064345.1	23780.2	82721	-3.4392	1	-1.79849
ENSMUSG00000064351.1	99377.4	241864	-2.62227	1	-1.28321
ENSMUSG00000065947.3	9713.15	25812.5	-3.86447	1	-1.41006
ENSMUSG00000075415.13	7208.04	4439.04	4.29613	1	0.69936
ENSMUSG00000078515.4	82.3208	317.807	-2.24755	1	-1.94882
ENSMUSG00000096847.2	13.158	111.143	-1.8644	1	-3.0784
ENSMUSG00000011751.16	42.3718	219.532	-1.87124	1	-2.37325
ENSMUSG00000022023.6	66.4264	285.166	-1.88639	1	-2.10198
ENSMUSG00000022456.18	66.9587	300.6	-1.85993	1	-2.1665
ENSMUSG00000022800.14	60.8414	266.598	-2.39792	1	-2.13154
ENSMUSG00000026918.16	56.478	244.564	-1.85982	1	-2.11445
ENSMUSG00000028278.14	14.8628	118.644	-1.8792	1	-2.99686
ENSMUSG00000028351.5	11.6865	129.485	-2.27099	1	-3.46987
ENSMUSG00000029211.11	12.239	130.15	-2.26432	1	-3.41062
ENSMUSG00000036641.9	9.17685	104.525	-2.44327	1	-3.50971
ENSMUSG00000040118.15	60.7069	561.667	-2.32208	1	-3.20978
ENSMUSG00000048148.18	247.874	754.934	-1.87081	1	-1.60674
ENSMUSG00000048960.13	304.236	915.512	-2.26413	1	-1.58939
ENSMUSG00000018849.6	26.9149	252.332	-2.28937	1	-3.22884
ENSMUSG00000024743.16	13.0544	116.763	-2.39809	1	-3.16098
ENSMUSG00000026594.14	26.2732	162.39	-1.85419	1	-2.6278
ENSMUSG00000041840.8	55.0991	203.799	-1.88524	1	-1.88705
ENSMUSG00000058740.14	19.3826	132.956	-2.2797	1	-2.77811
ENSMUSG00000064370.1	26880.9	69700.5	-3.19641	1	-1.37459
ENSMUSG00000112122.1	82.2675	344.213	-1.89172	1	-2.06491
ENSMUSG00000026090.16	6.95477	113.025	-2.30347	1	-4.0225
ENSMUSG00000027894.14	12.8562	242.945	-2.79176	1	-4.24009
ENSMUSG00000032503.18	33.8007	366.383	-2.32925	1	-3.43823
ENSMUSG00000056476.13	44.8196	273.79	-2.28033	1	-2.61087
ENSMUSG00000064341.1	23180.5	81954.4	-3.13757	1	-1.82191
ENSMUSG00000112667.1	79.9495	424.645	-2.25742	1	-2.4091
ENSMUSG00000004558.15	538.986	1458.91	-2.37161	1	-1.43657
ENSMUSG00000006930.15	13.2224	166.13	-2.70906	1	-3.65125
ENSMUSG00000008153.12	35.7535	235.845	-1.89284	1	-2.72168
ENSMUSG00000025867.8	160.732	844.74	-3.73986	1	-2.39386
ENSMUSG00000029577.13	70.029	310.13	-2.25587	1	-2.14685
ENSMUSG00000032011.5	88.5712	601.233	-2.56406	1	-2.76302
ENSMUSG00000034656.18	25.7163	236.97	-2.37154	1	-3.20395
ENSMUSG00000038375.15	1000.08	3446.35	-1.89335	1	-1.78495
ENSMUSG00000040250.14	73.2888	308.088	-2.33271	1	-2.07168
ENSMUSG00000064368.1	1049.74	3848.9	-3.40206	1	-1.87442
ENSMUSG00000067786.16	46.9294	291.214	-2.54486	1	-2.63351
ENSMUSG00000021474.9	15.5048	123.299	-2.60205	1	-2.99138
ENSMUSG00000047787.8	14.2413	106.326	-2.54674	1	-2.90034
ENSMUSG00000057329.7	17.4775	168.996	-2.5467	1	-3.27342
ENSMUSG00000064357.1	35664	109908	-2.83359	1	-1.62375
ENSMUSG00000007097.14	1689.39	3956.8	-2.69858	1	-1.22783
ENSMUSG00000017390.15	377.47	1069.35	-2.87758	1	-1.5023
ENSMUSG00000036095.11	74.8928	451.034	-2.72499	1	-2.59034
ENSMUSG00000039156.19	47.1221	233.317	-2.45778	1	-2.30781
ENSMUSG00000049556.5	26.9505	222.031	-2.35806	1	-3.04237
ENSMUSG00000052387.16	232.003	974.557	-2.72676	1	-2.0706
ENSMUSG00000020044.13	286.762	630.843	-1.89569	1	-1.13743
ENSMUSG00000033059.7	175.059	520.68	-2.46195	1	-1.57256
ENSMUSG00000039904.9	4510.35	2525.99	2.9677	1	0.83639
ENSMUSG00000042700.16	204.192	653.276	-2.35941	1	-1.67776
ENSMUSG00000009394.13	48.1356	362.35	-2.36184	1	-2.91221
ENSMUSG00000020340.16	362.81	1171.99	-2.53051	1	-1.69167
ENSMUSG00000028289.12	8.59169	50.8969	-2.3415	1	-2.56656
ENSMUSG00000034032.15	28.3513	155.266	-1.84715	1	-2.45326
ENSMUSG00000034275.18	90.2721	445.961	-2.34004	1	-2.30457
ENSMUSG00000021508.11	19.4917	115.953	-2.55686	1	-2.57261
ENSMUSG00000021779.17	13.8451	102.405	-2.58202	1	-2.88683
ENSMUSG00000036098.15	4133.55	2748.48	2.48894	1	0.588749
ENSMUSG00000061080.11	336.389	1078.04	-2.77249	1	-1.68021
ENSMUSG00000024109.18	771.533	1624.35	-2.56228	1	-1.07406
ENSMUSG00000027951.16	42.6796	234.033	-2.75185	1	-2.4551
ENSMUSG00000024524.17	55.4034	252.275	-2.51245	1	-2.18695
ENSMUSG00000028233.6	53.426	201.263	-1.8455	1	-1.91347
ENSMUSG00000055254.15	766.94	2037.35	-2.73992	1	-1.40951
ENSMUSG00000022037.15	540.98	1601.72	-2.4202	1	-1.56598
ENSMUSG00000031980.10	33.628	326.999	-2.42041	1	-3.28155
ENSMUSG00000049807.16	3994.1	2486.41	2.49075	1	0.683804
ENSMUSG00000020598.16	259.946	893.508	-2.94948	1	-1.78127
ENSMUSG00000022623.17	42.85	312.443	-2.23461	1	-2.86623
ENSMUSG00000002107.18	255.764	1005.4	-2.51686	1	-1.97488
ENSMUSG00000058546.8	595.998	1177.2	-1.89886	1	-0.981982
ENSMUSG00000016349.10	69.4891	452.585	-2.84851	1	-2.70333
ENSMUSG00000061751.16	118.399	755.659	-2.76122	1	-2.67408
ENSMUSG00000030302.16	148.651	708.754	-3.12945	1	-2.25336
ENSMUSG00000037852.8	889.823	2559.64	-3.04781	1	-1.52435
ENSMUSG00000020486.19	5077.09	3245.88	2.61313	1	0.64539
ENSMUSG00000033392.16	5628.44	4003.43	2.68	1	0.491496
ENSMUSG00000064363.1	46529.6	134443	-3.52088	1	-1.53078
ENSMUSG00000036634.15	6749.13	4408.36	2.0532	1	0.614459
ENSMUSG00000031385.14	2794.9	1724.78	2.73433	1	0.696382
ENSMUSG00000039953.13	744.128	1177.88	-1.90223	1	-0.662565
ENSMUSG00000045038.14	52.7162	484.999	-4.1391	1	-3.20166
ENSMUSG00000025666.16	174.96	589.427	-1.8405	1	-1.75229
ENSMUSG00000013033.16	280.303	678.281	-2.22973	1	-1.2749
ENSMUSG00000037989.15	60.9252	192.816	-1.83977	1	-1.66212
ENSMUSG00000102070.1	17922.1	53613.1	-4.27804	1	-1.58085
ENSMUSG00000028399.18	11448.9	7456.73	3.01225	1	0.618599
ENSMUSG00000037685.15	4176.21	2999.94	2.05033	1	0.477259
ENSMUSG00000060716.7	4426.72	2434.78	3.61402	1	0.862446
ENSMUSG00000034902.17	80.8967	299.182	-1.83705	1	-1.88687
ENSMUSG00000064367.1	20074.4	68549	-4.87458	1	-1.77178
ENSMUSG00000029309.7	1755.44	5149.43	-5.16536	1	-1.55258
ENSMUSG00000060924.15	25.7858	269.68	-2.2225	1	-3.3866
ENSMUSG00000036529.17	2588.42	1688.27	2.0449	1	0.616526
ENSMUSG00000017132.17	933.373	495.993	2.10706	1	0.912134
ENSMUSG00000016346.17	27.2088	238.057	-2.21369	1	-3.12916
ENSMUSG00000042724.8	6.45514	53.3306	-1.91932	1	-3.04644
ENSMUSG00000020333.17	262.65	683.899	-1.82159	1	-1.38064
ENSMUSG00000035640.18	16.6922	156.532	-2.21141	1	-3.2292
ENSMUSG00000018427.8	1743.2	1011.98	2.11157	1	0.784558
ENSMUSG00000032462.14	54.4244	214.753	-1.81887	1	-1.98035
ENSMUSG00000049336.16	31.4791	166.699	-1.92932	1	-2.40478
ENSMUSG00000045763.8	76.0374	306.953	-1.93011	1	-2.01324
ENSMUSG00000055717.13	2645.11	1809.66	2.02559	1	0.54761
ENSMUSG00000037280.12	933.231	435.453	2.02416	1	1.09972
ENSMUSG00000034731.11	47.752	284.665	-1.93368	1	-2.57563
ENSMUSG00000040612.13	39.5806	159.015	-1.93396	1	-2.0063
ENSMUSG00000020231.15	3186.02	2053.92	2.02192	1	0.633376
ENSMUSG00000055491.14	39.4537	137.138	-1.80675	1	-1.7974
ENSMUSG00000037579.7	5.02094	50.6718	-1.80458	1	-3.33515
ENSMUSG00000037826.5	106.726	318.272	-1.93931	1	-1.57635
ENSMUSG00000024500.20	17.6678	104.629	-1.80249	1	-2.56609
ENSMUSG00000021750.16	219.177	777.879	-2.1921	1	-1.82745
ENSMUSG00000026463.17	88.5896	379.221	-1.80178	1	-2.09783
ENSMUSG00000024533.17	398.934	812.366	-1.94152	1	-1.02598
ENSMUSG00000041852.15	519.219	946.272	-1.80108	1	-0.865911
ENSMUSG00000030067.17	68.9565	282.183	-2.19089	1	-2.03287
ENSMUSG00000038976.12	636.639	1275.01	-1.94646	1	-1.00196
ENSMUSG00000021700.10	140.318	495.998	-2.18625	1	-1.82164
ENSMUSG00000027199.14	6485.2	4379.76	1.74685	1	0.5663
ENSMUSG00000038390.11	16.355	102.201	-1.94977	1	-2.64361
ENSMUSG00000019820.11	285.517	690.923	-1.95097	1	-1.27495
ENSMUSG00000052981.6	5.54177	61.5221	-1.95145	1	-3.47268
ENSMUSG00000031441.15	2267.89	1586.45	1.75255	1	0.515547
ENSMUSG00000036473.16	62.1334	221.46	-1.78981	1	-1.83361
ENSMUSG00000014602.15	5583.13	8601.19	-2.18029	1	-0.623463
ENSMUSG00000028849.17	2054.17	1327.49	1.75361	1	0.62986
ENSMUSG00000028156.12	149.54	361.634	-1.78802	1	-1.274
ENSMUSG00000031918.16	1127.78	480.438	2.14064	1	1.23107
ENSMUSG00000044340.7	4125.27	3082.99	1.75499	1	0.420161
ENSMUSG00000045333.15	16.4479	135.05	-1.95644	1	-3.03752
ENSMUSG00000021094.10	26.7737	113.451	-1.78431	1	-2.08319
ENSMUSG00000025203.6	30605.2	23553.2	1.99808	1	0.37785
ENSMUSG00000027677.17	215.695	502.785	-1.78248	1	-1.22095
ENSMUSG00000020774.9	2204.58	1379.54	2.14642	1	0.676319
ENSMUSG00000001786.14	731.613	375.552	1.76151	1	0.962069
ENSMUSG00000036880.10	8.47558	67.9973	-1.77922	1	-3.00409
ENSMUSG00000035045.17	36.4413	190.195	-1.77909	1	-2.38384
ENSMUSG00000033763.14	439.315	1020.06	-1.76833	1	-1.21533
ENSMUSG00000021012.16	134.912	416.495	-1.97476	0.999999	-1.62628
ENSMUSG00000033569.17	145.054	435.522	-1.76659	0.999999	-1.58615
ENSMUSG00000055373.8	226.245	521.581	-1.9759	0.999999	-1.20501
ENSMUSG00000021782.14	116.393	376.856	-1.97754	0.999999	-1.69501
ENSMUSG00000025375.15	4330.93	3204.8	1.98072	0.999999	0.434441
ENSMUSG00000032181.7	399.493	878.574	-1.97974	0.999999	-1.13699
ENSMUSG00000058360.5	26.0268	126.958	-1.75964	0.999998	-2.28628
ENSMUSG00000024381.16	2458.46	1682.21	1.78185	0.999998	0.547392
ENSMUSG00000029757.16	13.272	90.4281	-1.98298	0.999998	-2.76838
ENSMUSG00000064354.1	12498.8	32337.4	-1.98357	0.999998	-1.37142
ENSMUSG00000063455.16	92.4614	387.01	-2.14859	0.999997	-2.06545
ENSMUSG00000063873.10	31.498	117.993	-1.59771	0.999996	-1.90536
ENSMUSG00000031781.14	33.7864	132.753	-1.59985	0.999996	-1.97422
ENSMUSG00000022565.15	177.831	459.036	-1.59517	0.999996	-1.3681
ENSMUSG00000033389.16	33.3978	151.356	-1.98651	0.999996	-2.18012
ENSMUSG00000039809.10	144.932	384.376	-1.60197	0.999996	-1.40714
ENSMUSG00000030849.18	3102.4	2200.04	1.78602	0.999996	0.495856
ENSMUSG00000022010.19	193.459	474.522	-1.60225	0.999996	-1.29445
ENSMUSG00000023033.14	137.186	477.641	-1.59259	0.999995	-1.79979
ENSMUSG00000019775.17	21.1279	99.7262	-1.59217	0.999995	-2.23882
ENSMUSG00000024851.14	65.895	194.545	-1.60413	0.999995	-1.56186
ENSMUSG00000020900.15	110.742	471.577	-1.98892	0.999994	-2.0903
ENSMUSG00000060961.16	660.317	1561.9	-1.75181	0.999994	-1.24207
ENSMUSG00000024172.10	9.0282	87.4678	-1.75074	0.999993	-3.27624
ENSMUSG00000018451.7	6.08385	67.7626	-1.75029	0.999993	-3.47743
ENSMUSG00000028517.8	717.007	1336.85	-1.60757	0.999992	-0.898782
ENSMUSG00000029778.12	112.46	326.264	-2.14151	0.999992	-1.53662
ENSMUSG00000038206.13	50.6486	188.255	-1.60784	0.999992	-1.8941
ENSMUSG00000028176.13	64.664	239.462	-1.60822	0.999991	-1.88876
ENSMUSG00000004902.7	24.8305	107.463	-1.58648	0.99999	-2.11366
ENSMUSG00000026991.20	2763.18	7303.04	-1.74795	0.99999	-1.40217
ENSMUSG00000016239.11	21.6495	141.653	-1.61091	0.999988	-2.70996
ENSMUSG00000074607.11	8.89599	72.7836	-1.61183	0.999986	-3.03238
ENSMUSG00000006315.9	23.4672	98.683	-1.74517	0.999985	-2.07215
ENSMUSG00000002833.11	66.7699	222.51	-1.996	0.999984	-1.7366
ENSMUSG00000022892.11	10061.7	7531.19	1.96317	0.999983	0.417926
ENSMUSG00000021144.14	48.3966	216.105	-1.58019	0.999979	-2.15876
ENSMUSG00000003934.5	1930.06	1246.87	1.79639	0.999977	0.630332
ENSMUSG00000026048.16	49.1356	155.846	-1.74157	0.999976	-1.66528
ENSMUSG00000019996.17	3671.17	2713.9	1.69438	0.999976	0.435872
ENSMUSG00000021615.13	31.7194	131.845	-1.57877	0.999975	-2.05541
ENSMUSG00000026469.14	299.161	644.82	-1.57862	0.999974	-1.10797
ENSMUSG00000025555.14	152.699	367.358	-1.57733	0.99997	-1.2665
ENSMUSG00000021196.14	216.049	471.249	-1.57566	0.999964	-1.12513
ENSMUSG00000036503.13	3506.38	2272.81	1.95806	0.999964	0.625501
ENSMUSG00000026587.15	138.672	416.383	-2.00223	0.999963	-1.58623
ENSMUSG00000027210.20	27.9693	162.312	-2.00237	0.999962	-2.53685
ENSMUSG00000063297.7	467.99	919.228	-1.57507	0.999962	-0.973946
ENSMUSG00000026259.14	18.408	163.89	-2.12987	0.999959	-3.15432
ENSMUSG00000028207.18	91.2397	247.712	-1.57407	0.999957	-1.44093
ENSMUSG00000039205.16	58.5814	200.107	-1.73649	0.999956	-1.77226
ENSMUSG00000018411.17	3410.02	2466.16	2.33547	0.999954	0.467517
ENSMUSG00000072964.14	11.4357	78.5027	-1.57235	0.999948	-2.7792
ENSMUSG00000026109.14	2320.24	1468.74	1.68816	0.999945	0.659695
ENSMUSG00000091712.2	1348.18	872.786	1.68683	0.999935	0.627316
ENSMUSG00000044465.19	58.8825	181.165	-1.73279	0.999934	-1.6214
ENSMUSG00000034235.17	2817.04	1924.96	1.80542	0.999921	0.549347
ENSMUSG00000011831.16	125.253	352.682	-1.56796	0.999919	-1.49352
ENSMUSG00000027692.16	605.098	1194.96	-1.62759	0.999912	-0.981718
ENSMUSG00000026915.16	279.563	634.219	-1.72979	0.99991	-1.18181
ENSMUSG00000021313.16	65.6372	388.967	-1.62822	0.999906	-2.56706
ENSMUSG00000037287.15	138.658	368.586	-1.5659	0.999901	-1.41046
ENSMUSG00000029071.16	46.9387	152.57	-1.56528	0.999896	-1.70062
ENSMUSG00000026173.15	29.0772	126.835	-1.63053	0.999882	-2.125
ENSMUSG00000027854.12	78.8464	269.879	-1.6308	0.999879	-1.7752
ENSMUSG00000022044.14	1911.35	1147.59	1.80869	0.999879	0.735993
ENSMUSG00000024487.5	53.1473	172.169	-1.56215	0.999862	-1.69576
ENSMUSG00000045136.6	112.952	402.813	-1.72481	0.999855	-1.83441
ENSMUSG00000042496.18	57.4447	228.188	-1.72439	0.999849	-1.98997
ENSMUSG00000027775.9	34.8062	146.032	-1.56034	0.999839	-2.06887
ENSMUSG00000040563.13	14.9099	86.0055	-2.11795	0.999838	-2.52816
ENSMUSG00000034111.6	54.7836	212.877	-1.55809	0.999807	-1.9582
ENSMUSG00000073888.13	3.5288	17.074	-1.72138	0.999804	-2.27455
ENSMUSG00000041329.13	718.887	1948.68	-2.01744	0.999793	-1.43866
ENSMUSG00000004110.17	90.9339	417.76	-1.72038	0.999787	-2.19978
ENSMUSG00000037110.20	118.934	308.882	-1.55637	0.999779	-1.37689
ENSMUSG00000032854.12	7147.22	4747.54	1.67577	0.999775	0.590201
ENSMUSG00000019039.14	31.5	122.1	-1.71923	0.999766	-1.95464
ENSMUSG00000057841.5	281.777	705.766	-2.11392	0.99976	-1.32463
ENSMUSG00000062591.5	11632.4	8657.66	2.32321	0.999754	0.426101
ENSMUSG00000063760.9	10.0777	78.7554	-1.64103	0.999712	-2.96622
ENSMUSG00000064358.1	17362.3	49442.1	-2.11064	0.999677	-1.50979
ENSMUSG00000058135.12	221.503	586.178	-1.71356	0.999643	-1.40401
ENSMUSG00000027523.20	1233.47	1832.97	-1.54802	0.999614	-0.571455
ENSMUSG00000034868.9	45.938	207.924	-1.71126	0.999584	-2.1783
ENSMUSG00000019189.13	82.7013	233.219	-1.64675	0.999572	-1.4957
ENSMUSG00000071856.10	67.2883	202.052	-1.54541	0.999553	-1.5863
ENSMUSG00000069769.13	521.322	994.492	-1.43577	0.999545	-0.931786
ENSMUSG00000061601.15	963.944	1574.57	-1.4338	0.999541	-0.707938
ENSMUSG00000018899.16	20.2635	110.776	-1.43239	0.999533	-2.4507
ENSMUSG00000022197.16	26.3094	116.884	-1.43161	0.999528	-2.15143
ENSMUSG00000002763.16	43.9437	124.816	-1.43152	0.999527	-1.50607
ENSMUSG00000020589.17	36.0312	249.438	-2.10599	0.999524	-2.79136
ENSMUSG00000024924.14	1827.36	1202.26	1.82099	0.999512	0.604014
ENSMUSG00000053141.16	129.951	508.428	-1.64899	0.999509	-1.96808
ENSMUSG00000049550.17	153.991	364.085	-1.44451	0.999474	-1.24143
ENSMUSG00000028619.15	28.1537	87.5446	-1.44468	0.999471	-1.63669
ENSMUSG00000024981.6	7.39621	40.9028	-1.54187	0.999466	-2.46734
ENSMUSG00000039519.6	10.8943	55.4805	-1.44514	0.999464	-2.3484
ENSMUSG00000024411.11	278.254	790.088	-1.65061	0.999461	-1.50561
ENSMUSG00000034612.7	23.8213	103.471	-1.42632	0.999449	-2.11891
ENSMUSG00000051351.14	39.2986	145.494	-1.44669	0.99944	-1.88841
ENSMUSG00000021379.2	120.064	362.511	-1.44766	0.999424	-1.59423
ENSMUSG00000036391.16	170.284	353.581	-1.53981	0.999414	-1.0541
ENSMUSG00000036792.12	191.613	449.721	-1.65232	0.999409	-1.23083
ENSMUSG00000028161.17	722.172	1197.57	-1.42369	0.999385	-0.729698
ENSMUSG00000026527.13	52.7636	159.376	-1.45026	0.999377	-1.59482
ENSMUSG00000068267.5	238.449	873.974	-1.70406	0.999371	-1.87391
ENSMUSG00000033720.12	176.747	416.043	-1.42299	0.999365	-1.23505
ENSMUSG00000034647.15	1006.6	1854.35	-2.03094	0.999359	-0.881425
ENSMUSG00000029502.14	155.979	480.415	-1.65418	0.99935	-1.62293
ENSMUSG00000058254.12	534.013	1135.57	-1.65437	0.999344	-1.08847
ENSMUSG00000008763.16	359.48	689.987	-1.53699	0.999343	-0.940658
ENSMUSG00000036564.17	145.167	501.047	-1.70314	0.999342	-1.78724
ENSMUSG00000067279.3	40.9446	165.866	-1.65478	0.999331	-2.01827
ENSMUSG00000027305.9	11.1564	40.2242	-1.53646	0.999329	-1.8502
ENSMUSG00000029179.14	29.818	117.585	-1.45278	0.999329	-1.97945
ENSMUSG00000033065.14	75.8809	269.839	-1.53594	0.999317	-1.83029
ENSMUSG00000020718.12	41.2165	126.325	-1.45354	0.999314	-1.61585
ENSMUSG00000032936.13	19.331	106.725	-1.70217	0.999311	-2.46492
ENSMUSG00000030876.7	151.671	374.514	-1.42123	0.999311	-1.30408
ENSMUSG00000021719.9	104.218	441.82	-2.03202	0.999308	-2.08386
ENSMUSG00000029629.17	126.876	552.781	-1.70202	0.999306	-2.12329
ENSMUSG00000009569.14	296.006	580.031	-1.4544	0.999298	-0.9705
ENSMUSG00000017670.16	110.266	339.4	-1.53312	0.999249	-1.622
ENSMUSG00000092558.3	49.3581	157.654	-1.70009	0.999245	-1.6754
ENSMUSG00000022105.6	422.154	762.25	-1.41928	0.999242	-0.852496
ENSMUSG00000033595.7	2175.7	1313.55	1.66217	0.999235	0.728006
ENSMUSG00000033953.10	274.201	523.996	-1.41904	0.999233	-0.934324
ENSMUSG00000027087.11	1500.08	926.7	1.82589	0.999217	0.694864
ENSMUSG00000033909.17	62.1597	186.177	-1.5314	0.99921	-1.58263
ENSMUSG00000031099.16	46.5166	146.045	-1.53125	0.999207	-1.6506
ENSMUSG00000052889.11	342.276	697.13	-1.45982	0.9992	-1.02627
ENSMUSG00000022494.15	21.2104	112.416	-1.45987	0.999199	-2.406
ENSMUSG00000038248.8	74.7513	220.758	-1.46192	0.999166	-1.5623
ENSMUSG00000032281.11	132.374	354.255	-1.46212	0.999163	-1.42017
ENSMUSG00000029364.15	314.092	566.07	-1.41724	0.999162	-0.849793
ENSMUSG00000061410.6	104.715	322.255	-1.66029	0.999156	-1.62173
ENSMUSG00000032518.6	670.255	1317.14	-1.52834	0.999146	-0.974624
ENSMUSG00000030246.12	194.599	467.359	-1.52792	0.999139	-1.26403
ENSMUSG00000019796.12	8.58573	97.1087	-2.09743	0.999135	-3.49959
ENSMUSG00000018661.17	37.8168	129.362	-1.52607	0.999106	-1.77432
ENSMUSG00000005982.14	48.9055	193.864	-1.52531	0.999094	-1.98698
ENSMUSG00000040785.19	1203.11	2141.58	-2.03662	0.999073	-0.831909
ENSMUSG00000041923.15	35.1482	123.082	-1.41516	0.999072	-1.8081
ENSMUSG00000034675.17	18.6992	108.832	-1.47155	0.999062	-2.54105
ENSMUSG00000028234.6	324.71	819.215	-1.47194	0.99906	-1.33509
ENSMUSG00000058672.7	99.6901	341.906	-1.52285	0.999058	-1.77808
ENSMUSG00000074129.14	595.262	1109.11	-1.47283	0.999055	-0.897808
ENSMUSG00000000184.12	24.3941	139.479	-1.47292	0.999054	-2.51545
ENSMUSG00000022296.9	96.3889	345.548	-2.03697	0.999054	-1.84195
ENSMUSG00000029407.10	130.582	325.348	-1.47337	0.999052	-1.31703
ENSMUSG00000034168.7	37.6524	136.121	-1.47661	0.999042	-1.85408
ENSMUSG00000031732.12	35.9262	113.292	-1.47675	0.999041	-1.65695
ENSMUSG00000074785.5	28.431	117.151	-1.47795	0.999039	-2.04284
ENSMUSG00000063358.17	487.249	809.532	-1.47798	0.999039	-0.73243
ENSMUSG00000053094.15	62.6787	212.729	-2.09568	0.999039	-1.76297
ENSMUSG00000067369.12	38.632	130.088	-1.4873	0.999039	-1.75161
ENSMUSG00000029467.15	1182.56	1804.91	-1.41441	0.999038	-0.610008
ENSMUSG00000032840.7	21.2126	85.8675	-1.49416	0.999033	-2.01719
ENSMUSG00000030122.12	214.795	524.284	-1.52044	0.99903	-1.28739
ENSMUSG00000024480.9	19.422	90.1552	-1.49592	0.99903	-2.21472
ENSMUSG00000032047.5	42.3198	213.484	-1.69284	0.999026	-2.33472
ENSMUSG00000017740.17	39.7298	183.47	-1.41408	0.999023	-2.20725
ENSMUSG00000028634.17	233.036	505.773	-1.49911	0.99902	-1.11794
ENSMUSG00000043323.17	110.612	359.161	-1.50107	0.999014	-1.69913
ENSMUSG00000015714.11	2012.09	1131.26	1.82842	0.999012	0.830771
ENSMUSG00000001175.16	2077.19	3210.39	-1.50195	0.99901	-0.628115
ENSMUSG00000026163.17	23.116	265.556	-1.5024	0.999009	-3.52205
ENSMUSG00000036192.15	157.59	448.206	-1.50308	0.999006	-1.50798
ENSMUSG00000028292.14	20.2413	68.2239	-1.51615	0.998999	-1.75298
ENSMUSG00000020230.15	25.9207	79.4468	-1.50548	0.998998	-1.61589
ENSMUSG00000032307.16	48.9347	184.337	-1.69162	0.998994	-1.91342
ENSMUSG00000033706.13	14.548	50.7668	-1.50995	0.998988	-1.80306
ENSMUSG00000000247.11	25.1821	100.002	-1.41297	0.998971	-1.98956
ENSMUSG00000021794.16	546.854	993.808	-1.68895	0.998931	-0.861812
ENSMUSG00000024597.11	8049.69	5841.21	1.9284	0.998922	0.462665
ENSMUSG00000031144.15	60.8734	280.117	-1.66977	0.998908	-2.20215
ENSMUSG00000035310.15	74.7523	228.657	-1.67067	0.99889	-1.61299
ENSMUSG00000042810.14	70.9547	193.391	-1.68541	0.998866	-1.44655
ENSMUSG00000051339.10	40.5392	153.351	-1.68517	0.998862	-1.91945
ENSMUSG00000029781.7	29.5957	133.544	-1.68357	0.998843	-2.17386
ENSMUSG00000063888.7	42.3599	128.927	-1.09586	0.998838	-1.60578
ENSMUSG00000022391.16	64.3065	159.373	-1.09671	0.998837	-1.30938
ENSMUSG00000040652.16	24.9175	75.1467	-1.09401	0.998834	-1.59255
ENSMUSG00000017734.15	1438.28	2509.46	-1.09345	0.998831	-0.803028
ENSMUSG00000043090.18	82.6683	203.171	-1.09294	0.998828	-1.29729
ENSMUSG00000075470.2	91.1492	216.855	-1.09968	0.998824	-1.25043
ENSMUSG00000031302.16	261.043	427.666	-1.09245	0.998824	-0.712197
ENSMUSG00000052833.9	22.3861	86.717	-1.09989	0.998823	-1.95371
ENSMUSG00000017009.3	103.713	238.295	-1.10017	0.99882	-1.20015
ENSMUSG00000055320.18	45.4574	173.496	-1.67695	0.998819	-1.93231
ENSMUSG00000032601.13	48.5032	103.115	-1.10037	0.998818	-1.0881
ENSMUSG00000031209.14	8.02477	39.14	-1.101	0.998812	-2.28611
ENSMUSG00000025651.14	180.244	326.016	-1.09064	0.998807	-0.854996
ENSMUSG00000024213.14	448.095	761.569	-1.10191	0.998803	-0.765171
ENSMUSG00000025794.9	419.854	728.032	-1.08963	0.998796	-0.794115
ENSMUSG00000031246.14	185.819	333.984	-1.10272	0.998792	-0.845884
ENSMUSG00000022338.8	434.311	694.426	-1.10329	0.998784	-0.677093
ENSMUSG00000026604.17	11.4281	64.7511	-1.1037	0.998778	-2.50232
ENSMUSG00000054252.18	327.379	595.658	-1.08787	0.998769	-0.863521
ENSMUSG00000028557.10	218.825	386.281	-1.08762	0.998765	-0.819871
ENSMUSG00000033102.15	23.5848	97.1234	-1.10473	0.998761	-2.04196
ENSMUSG00000027544.16	27.702	117.303	-1.10479	0.99876	-2.08217
ENSMUSG00000034243.17	726.839	1154.35	-1.10484	0.998759	-0.667374
ENSMUSG00000021428.9	69.9441	151.969	-1.08717	0.998758	-1.1195
ENSMUSG00000032294.17	741.081	1087.61	-1.08662	0.998747	-0.553459
ENSMUSG00000002881.14	154.04	364.959	-1.1056	0.998745	-1.24442
ENSMUSG00000045128.9	465.026	800.517	-1.08623	0.998739	-0.783619
ENSMUSG00000060227.15	194.866	361.019	-1.08571	0.998729	-0.889593
ENSMUSG00000020611.14	558.737	818.125	-1.10651	0.998727	-0.550152
ENSMUSG00000062098.11	248.511	395.766	-1.0856	0.998727	-0.671342
ENSMUSG00000058799.16	598.043	1110.75	-1.10724	0.998712	-0.893207
ENSMUSG00000021745.14	36.7653	147.932	-1.10739	0.998709	-2.00851
ENSMUSG00000046101.16	35.2457	91.3538	-1.10819	0.998691	-1.37402
ENSMUSG00000079481.11	61.2813	159.106	-1.08298	0.998666	-1.37647
ENSMUSG00000037605.16	315.128	587.039	-1.10948	0.99866	-0.897519
ENSMUSG00000093674.7	571.227	1057.38	-1.40673	0.998656	-0.888353
ENSMUSG00000025393.12	863.837	1321.45	-1.11032	0.998639	-0.613292
ENSMUSG00000005609.16	786.935	433.318	1.46432	0.998636	0.860818
ENSMUSG00000018433.14	31.5924	94.0452	-1.11062	0.998631	-1.57377
ENSMUSG00000079157.4	15.7641	76.3076	-1.08156	0.998628	-2.27518
ENSMUSG00000019943.10	658.78	969.71	-1.08129	0.99862	-0.557757
ENSMUSG00000036985.12	1128.35	683.838	1.46824	0.99862	0.722494
ENSMUSG00000003134.10	15.5534	44.0162	-1.08102	0.998612	-1.50081
ENSMUSG00000037470.14	286.209	466.232	-1.08077	0.998605	-0.703978
ENSMUSG00000063047.9	141.886	47.7239	1.46977	0.998597	1.57195
ENSMUSG00000010175.13	2180.78	1573.15	1.46997	0.998593	0.471187
ENSMUSG00000014956.15	1091.28	1570.69	-1.11247	0.998579	-0.525381
ENSMUSG00000060938.14	613.215	923.477	-1.1131	0.998561	-0.590682
ENSMUSG00000033565.18	137.024	271.577	-1.11345	0.99855	-0.986929
ENSMUSG00000032009.8	673.938	1023.32	-1.07878	0.998543	-0.602566
ENSMUSG00000018909.15	257.822	592.322	-2.04567	0.99854	-1.2
ENSMUSG00000058297.16	110.862	394.873	-1.40439	0.998535	-1.83263
ENSMUSG00000029334.14	8.07942	44.8207	-1.07833	0.998528	-2.47184
ENSMUSG00000021484.8	175.656	366.652	-1.40392	0.998511	-1.06166
ENSMUSG00000022139.17	3829.15	2970.19	1.6522	0.998473	0.366468
ENSMUSG00000028649.21	7294.59	8343.07	-1.0766	0.998468	-0.19375
ENSMUSG00000021846.9	145.307	278.415	-1.07647	0.998464	-0.938128
ENSMUSG00000030307.8	385.062	809.325	-1.35008	0.99846	-1.07163
ENSMUSG00000030701.17	4126.53	7743.49	-1.17577	0.99845	-0.908054
ENSMUSG00000031442.21	135.216	347.748	-1.35371	0.99845	-1.36278
ENSMUSG00000000740.12	552.448	997.079	-1.17556	0.998449	-0.851868
ENSMUSG00000024764.10	37.6046	108.712	-1.07602	0.998447	-1.53153
ENSMUSG00000036565.7	120.857	283.672	-1.17904	0.998446	-1.23093
ENSMUSG00000032549.7	669.5	1000.6	-1.34735	0.998445	-0.579711
ENSMUSG00000038366.15	108.255	287.656	-1.17484	0.998444	-1.40991
ENSMUSG00000111163.1	37.4022	138.961	-1.17463	0.998442	-1.89349
ENSMUSG00000032386.15	112.993	256.274	-1.17407	0.998439	-1.18146
ENSMUSG00000054942.13	310.775	483.811	-1.07573	0.998437	-0.638572
ENSMUSG00000022075.7	57.5656	130.737	-1.17372	0.998435	-1.18338
ENSMUSG00000026207.16	51.847	134.399	-1.17351	0.998432	-1.37419
ENSMUSG00000022811.17	456.318	692.162	-1.07553	0.998429	-0.601071
ENSMUSG00000058600.13	258.286	507.982	-1.35578	0.998428	-0.975809
ENSMUSG00000032123.5	18.5247	51.2724	-1.11736	0.998426	-1.46873
ENSMUSG00000048330.14	58.0785	194.243	-1.35657	0.998417	-1.74179
ENSMUSG00000023953.9	75.8517	15.5292	1.47589	0.998416	2.2882
ENSMUSG00000042396.10	52.5041	165.423	-1.35704	0.99841	-1.65566
ENSMUSG00000020122.16	114.935	240.514	-1.11797	0.998406	-1.0653
ENSMUSG00000024661.7	19494.4	33755	-1.17157	0.998404	-0.79204
ENSMUSG00000038665.15	184.932	384.706	-1.11807	0.998403	-1.05676
ENSMUSG00000022103.10	7.12106	53.5149	-2.08488	0.9984	-2.90978
ENSMUSG00000032883.15	1281.64	1585	-1.17102	0.998394	-0.30649
ENSMUSG00000058298.10	40.1314	110.754	-1.18317	0.998385	-1.46456
ENSMUSG00000020135.13	221.246	420.921	-1.17023	0.99838	-0.927897
ENSMUSG00000058318.15	304.151	522.423	-1.07392	0.998368	-0.780431
ENSMUSG00000057098.14	548.734	1050.63	-1.1842	0.998362	-0.937078
ENSMUSG00000037012.18	149.686	339.469	-1.34232	0.998361	-1.18134
ENSMUSG00000038065.13	221.604	465.376	-1.40081	0.998357	-1.07041
ENSMUSG00000059409.9	55.9296	171.497	-1.07349	0.998351	-1.6165
ENSMUSG00000040037.13	178.486	480.329	-1.16887	0.998351	-1.42821
ENSMUSG00000047648.13	48.6282	183.887	-1.40062	0.998347	-1.91895
ENSMUSG00000051790.15	122.318	272.455	-1.34168	0.998345	-1.15538
ENSMUSG00000057880.12	431.122	756.406	-1.36055	0.998341	-0.811064
ENSMUSG00000028488.15	117.112	340.58	-1.36125	0.998325	-1.5401
ENSMUSG00000025656.17	216.56	477.958	-1.39993	0.998315	-1.14212
ENSMUSG00000050697.9	137.662	296.562	-1.16727	0.998313	-1.10721
ENSMUSG00000026790.19	69.0033	225.317	-1.18586	0.998311	-1.70722
ENSMUSG00000059456.13	56.2432	164.716	-1.07208	0.998294	-1.55023
ENSMUSG00000030257.16	683.659	971.972	-1.1865	0.99829	-0.507637
ENSMUSG00000015605.6	52.7649	148.955	-1.39929	0.998286	-1.49723
ENSMUSG00000032413.12	185.83	445.968	-1.36342	0.99827	-1.26296
ENSMUSG00000030226.12	12.4321	172.751	-2.08254	0.998266	-3.79655
ENSMUSG00000024393.14	863.469	1318.26	-1.36381	0.99826	-0.610421
ENSMUSG00000044667.12	93.986	236.874	-1.33851	0.998256	-1.33361
ENSMUSG00000051391.9	473.626	801.434	-1.18754	0.998251	-0.758835
ENSMUSG00000022883.11	215.5	386.51	-1.18763	0.998247	-0.842817
ENSMUSG00000038615.17	447.255	725.587	-1.3983	0.998241	-0.698051
ENSMUSG00000022387.17	214.254	432.581	-1.12306	0.998234	-1.01365
ENSMUSG00000066760.12	144.487	297.194	-1.18819	0.998226	-1.04046
ENSMUSG00000028194.15	135.381	351.396	-1.39781	0.998221	-1.37608
ENSMUSG00000020647.10	310.695	606.107	-1.16363	0.998213	-0.964074
ENSMUSG00000033419.16	206.626	475.169	-1.18874	0.998202	-1.20142
ENSMUSG00000062328.8	342.871	619.917	-1.33679	0.998199	-0.85441
ENSMUSG00000030265.14	331.796	632.62	-1.06965	0.998191	-0.931043
ENSMUSG00000028756.12	710.166	1247.37	-1.06946	0.998183	-0.812662
ENSMUSG00000040325.16	92.7761	216.407	-1.16241	0.998177	-1.22192
ENSMUSG00000029419.8	132.656	281.333	-1.12497	0.99817	-1.08458
ENSMUSG00000059995.12	69.4864	202.989	-1.33585	0.998165	-1.5466
ENSMUSG00000030452.16	33.7276	108.81	-1.3352	0.998142	-1.6898
ENSMUSG00000020706.13	56.1063	161.875	-1.19029	0.998131	-1.52864
ENSMUSG00000026662.13	29.6845	86.9373	-1.06828	0.998131	-1.55027
ENSMUSG00000027695.16	289.946	555.338	-1.39524	0.998117	-0.937583
ENSMUSG00000026077.15	50.7356	195.439	-1.36912	0.998112	-1.94565
ENSMUSG00000020175.15	15.7217	46.0116	-1.16016	0.998111	-1.54924
ENSMUSG00000042870.15	40.7442	138.12	-1.12686	0.998109	-1.76126
ENSMUSG00000066900.11	36.5504	120.61	-1.36923	0.998109	-1.72239
ENSMUSG00000029245.16	205.063	488.567	-1.39501	0.998108	-1.25249
ENSMUSG00000060503.6	18.2915	81.8827	-1.3693	0.998106	-2.16239
ENSMUSG00000056952.13	37.5016	80.7022	-1.06768	0.998105	-1.10565
ENSMUSG00000102543.5	24.3176	142.362	-1.39477	0.998099	-2.5495
ENSMUSG00000013523.13	4183.39	9776.21	-1.36961	0.998098	-1.2246
ENSMUSG00000039716.12	395.458	733.096	-1.19115	0.998088	-0.890478
ENSMUSG00000019971.10	72.1978	276.369	-2.05393	0.998082	-1.93657
ENSMUSG00000048142.9	25.5606	136.747	-1.37062	0.998071	-2.41952
ENSMUSG00000094483.2	1193.91	1679.64	-1.12811	0.99807	-0.492461
ENSMUSG00000024589.18	216.756	439.402	-1.39392	0.99807	-1.01947
ENSMUSG00000004771.12	197.94	384.952	-1.15863	0.998066	-0.959617
ENSMUSG00000005360.14	968.759	2083.86	-2.07858	0.998063	-1.10505
ENSMUSG00000028914.13	21.6424	69.1903	-1.12851	0.998058	-1.67671
ENSMUSG00000032517.16	20143.2	43090	-1.37112	0.998057	-1.09706
ENSMUSG00000089901.1	35.0397	111.861	-1.15783	0.998044	-1.67465
ENSMUSG00000022674.15	38.0497	101.936	-1.33238	0.998033	-1.4217
ENSMUSG00000007880.16	1069.62	1444.18	-1.15729	0.998029	-0.433154
ENSMUSG00000032186.15	3007.3	3860.35	-1.06598	0.998028	-0.360266
ENSMUSG00000113817.1	8.40816	33.0466	-1.12959	0.998027	-1.97464
ENSMUSG00000029592.11	576.649	308.005	1.44917	0.998026	0.904742
ENSMUSG00000041607.17	50367.8	107634	-1.33198	0.998017	-1.09556
ENSMUSG00000091957.3	43.8979	136.826	-1.15646	0.998006	-1.64012
ENSMUSG00000033967.4	15.1107	45.7669	-1.13038	0.998004	-1.59873
ENSMUSG00000020886.17	220.488	456.17	-1.15578	0.997988	-1.04887
ENSMUSG00000043987.18	40.7816	111.27	-1.15534	0.997977	-1.44807
ENSMUSG00000028005.13	55.6191	176.729	-1.15476	0.997963	-1.66789
ENSMUSG00000028354.13	168.255	492.383	-2.07621	0.997961	-1.54913
ENSMUSG00000032479.15	3304.7	6938.7	-1.38914	0.99794	-1.07015
ENSMUSG00000026185.8	122.249	421.611	-1.37633	0.99794	-1.78608
ENSMUSG00000015944.9	86.0678	178.491	-1.06403	0.997939	-1.05231
ENSMUSG00000028274.17	105.051	290.36	-1.3887	0.997931	-1.46675
ENSMUSG00000027406.13	106.635	208.551	-1.15328	0.997927	-0.967719
ENSMUSG00000025104.13	416.608	780.987	-1.1336	0.997925	-0.906608
ENSMUSG00000060166.6	34.9052	136.163	-1.3878	0.997916	-1.96382
ENSMUSG00000024347.16	59.4084	227.977	-1.3784	0.997907	-1.94015
ENSMUSG00000029772.17	522.284	865.528	-1.06335	0.997907	-0.728745
ENSMUSG00000011096.17	27.5275	78.5199	-1.15225	0.997906	-1.51218
ENSMUSG00000026933.17	300.949	489.351	-1.1521	0.997903	-0.701349
ENSMUSG00000024231.15	47.1794	163.018	-1.37888	0.997902	-1.78881
ENSMUSG00000063887.13	156.288	318.501	-1.15203	0.997902	-1.02709
ENSMUSG00000021057.15	62.2959	189.245	-1.38636	0.997896	-1.60305
ENSMUSG00000020950.10	43.8908	134.947	-1.26965	0.997894	-1.6204
ENSMUSG00000046020.13	44.367	110.757	-1.27349	0.99789	-1.31985
ENSMUSG00000072214.7	69.4091	203.633	-1.38563	0.997889	-1.55277
ENSMUSG00000054423.14	196.366	400.928	-1.37997	0.997889	-1.0298
ENSMUSG00000037217.15	113.09	322.681	-1.38525	0.997887	-1.51264
ENSMUSG00000081974.3	62.3108	172.866	-1.27418	0.997884	-1.4721
ENSMUSG00000024665.8	199.027	422.276	-1.38105	0.997883	-1.08522
ENSMUSG00000039652.16	184.086	358.771	-1.38172	0.997879	-0.962684
ENSMUSG00000025871.18	359.004	571.034	-1.13616	0.997874	-0.669578
ENSMUSG00000025747.12	39.6338	121.628	-1.26701	0.997871	-1.61767
ENSMUSG00000063882.12	195.424	387.104	-1.26686	0.997869	-0.98611
ENSMUSG00000024921.17	900.245	1282.78	-1.13643	0.997869	-0.51088
ENSMUSG00000049517.8	249.105	445.134	-1.13671	0.997864	-0.837488
ENSMUSG00000020755.9	42.683	138.722	-1.19514	0.997861	-1.70047
ENSMUSG00000037343.8	59.3055	191.484	-1.26609	0.997857	-1.69099
ENSMUSG00000059146.12	150.878	380.422	-1.2766	0.997855	-1.33421
ENSMUSG00000057981.5	31.244	91.3262	-1.13753	0.997853	-1.54745
ENSMUSG00000013076.17	20.5217	105.197	-2.07268	0.997844	-2.35786
ENSMUSG00000000134.17	40.8906	118.107	-1.32771	0.997841	-1.53026
ENSMUSG00000046432.12	31.8749	107.71	-1.27764	0.997838	-1.75666
ENSMUSG00000031523.16	48.6421	159.264	-1.14774	0.997835	-1.71114
ENSMUSG00000024654.8	380.532	682.669	-1.14737	0.99783	-0.843168
ENSMUSG00000071415.6	268.494	516.495	-1.13976	0.997827	-0.943863
ENSMUSG00000032470.17	127.22	254.625	-1.14708	0.997827	-1.00105
ENSMUSG00000009681.10	238.884	418.353	-1.14688	0.997826	-0.808411
ENSMUSG00000031428.11	77.3477	192.137	-1.14675	0.997825	-1.3127
ENSMUSG00000030521.11	35.6124	97.5888	-1.19573	0.997824	-1.45433
ENSMUSG00000001419.17	237.704	444.296	-1.14029	0.997823	-0.902351
ENSMUSG00000075318.13	139.38	337.915	-1.14597	0.99782	-1.27764
ENSMUSG00000032356.12	91.5768	295.307	-1.14111	0.997817	-1.68916
ENSMUSG00000046157.13	17.8583	42.8988	-1.06133	0.997814	-1.26434
ENSMUSG00000023927.15	101.974	273.313	-1.14467	0.997813	-1.42236
ENSMUSG00000025967.16	299.965	532.816	-1.14454	0.997813	-0.828845
ENSMUSG00000030323.13	96.1102	187.013	-1.14228	0.997813	-0.960374
ENSMUSG00000027288.16	1132.69	1545.09	-1.14402	0.997812	-0.447934
ENSMUSG00000022094.15	32.4021	76.2567	-1.14303	0.99781	-1.23478
ENSMUSG00000027177.14	621.323	941.968	-1.26361	0.997806	-0.600335
ENSMUSG00000030310.10	1050.92	1623.08	-1.19614	0.997798	-0.627081
ENSMUSG00000079173.11	40.1893	123.664	-1.28019	0.997786	-1.62154
ENSMUSG00000026249.10	284.486	511.672	-1.28037	0.997782	-0.846859
ENSMUSG00000026482.13	30.2873	143.395	-2.06335	0.997781	-2.24321
ENSMUSG00000022285.17	1624.37	2385.56	-1.26244	0.997776	-0.554447
ENSMUSG00000024644.17	44.3883	123.727	-1.28071	0.997775	-1.47891
ENSMUSG00000030519.14	95.6203	259.719	-1.28089	0.997771	-1.44156
ENSMUSG00000066443.5	11.9946	97.6331	-1.28096	0.997769	-3.02498
ENSMUSG00000034317.14	1732.81	1257.3	1.44583	0.997767	0.462789
ENSMUSG00000018548.15	176.438	415.144	-1.26196	0.997761	-1.23445
ENSMUSG00000027895.10	4.89179	28.1179	-1.28186	0.997747	-2.52305
ENSMUSG00000059772.12	1829.68	3359.22	-1.28233	0.997735	-0.876537
ENSMUSG00000055762.16	213.764	425.964	-1.05873	0.997694	-0.994714
ENSMUSG00000039533.8	195.015	372.481	-1.2847	0.997672	-0.933585
ENSMUSG00000069539.11	61.1508	191.892	-1.05796	0.997658	-1.64985
ENSMUSG00000037679.9	1667.63	1108.87	1.44448	0.997655	0.588713
ENSMUSG00000068747.14	2749.05	1873.19	1.49147	0.997654	0.553432
ENSMUSG00000038708.10	890.409	1297.44	-1.19876	0.997624	-0.54313
ENSMUSG00000020321.16	240.054	478.895	-1.19896	0.99761	-0.996351
ENSMUSG00000025958.14	167.643	325.549	-1.05662	0.997597	-0.957486
ENSMUSG00000027304.9	139.22	331.161	-1.32087	0.997572	-1.25017
ENSMUSG00000013236.17	709.978	1257.6	-1.28823	0.997571	-0.824826
ENSMUSG00000025352.6	14.3049	44.8122	-1.05596	0.997567	-1.64739
ENSMUSG00000027425.18	35.8074	92.2735	-1.32057	0.997561	-1.36566
ENSMUSG00000031425.15	140361	95286.2	1.49353	0.997555	0.558803
ENSMUSG00000033904.16	4871.63	3501.39	1.53854	0.997554	0.476479
ENSMUSG00000028869.13	56.4384	150.932	-1.05564	0.997553	-1.41915
ENSMUSG00000006403.13	1852.15	1287.45	1.49378	0.997543	0.524686
ENSMUSG00000022884.16	1465.9	1889.42	-1.055	0.997524	-0.366157
ENSMUSG00000031765.8	487.005	745.341	-1.05489	0.99752	-0.613962
ENSMUSG00000002679.14	17.6461	48.6046	-1.29007	0.997519	-1.46174
ENSMUSG00000028106.13	328.149	497.3	-1.05449	0.997502	-0.599762
ENSMUSG00000037674.15	218.32	403.646	-1.2551	0.997489	-0.886644
ENSMUSG00000019370.10	497.879	852.259	-1.31809	0.997478	-0.775498
ENSMUSG00000068523.12	34.402	110.046	-1.2918	0.997471	-1.67754
ENSMUSG00000029705.17	375.466	663.214	-1.3178	0.997469	-0.820792
ENSMUSG00000023961.16	1216.61	748.213	1.49563	0.997461	0.701352
ENSMUSG00000031987.6	228.796	559.647	-1.20111	0.99746	-1.29045
ENSMUSG00000020721.16	198.323	471.219	-1.29282	0.997445	-1.24855
ENSMUSG00000027893.14	1075.48	1551.33	-1.31686	0.997441	-0.52852
ENSMUSG00000039747.11	19.1033	53.3448	-1.05287	0.997431	-1.48153
ENSMUSG00000030774.13	2051.22	1447.57	1.49642	0.997426	0.502855
ENSMUSG00000020483.14	781.34	1459.12	-1.29397	0.997416	-0.901079
ENSMUSG00000026803.17	40.5871	107.02	-1.2957	0.997376	-1.39879
ENSMUSG00000031775.5	1156.44	702.793	1.49782	0.997369	0.718524
ENSMUSG00000096220.2	24.8936	92.4498	-1.25273	0.997369	-1.8929
ENSMUSG00000031714.9	2815.26	2033.24	1.44109	0.997358	0.469489
ENSMUSG00000026123.11	298.105	528.507	-1.31108	0.997312	-0.8261
ENSMUSG00000083863.1	5.67841	21.3977	-1.04985	0.997305	-1.9139
ENSMUSG00000035805.13	94.8257	248.041	-1.20331	0.997303	-1.38723
ENSMUSG00000042104.18	158.446	309.521	-1.04972	0.997299	-0.966041
ENSMUSG00000037788.14	12.9165	61.5191	-1.04935	0.997284	-2.25182
ENSMUSG00000042763.9	17.7514	54.8043	-1.3023	0.997277	-1.62636
ENSMUSG00000022200.8	145.819	289.253	-1.30791	0.997275	-0.988151
ENSMUSG00000028669.15	29.873	115.532	-1.30748	0.997273	-1.95138
ENSMUSG00000034593.16	762.841	1181.45	-1.3043	0.997267	-0.631105
ENSMUSG00000042751.14	33.2842	103.878	-1.04832	0.997243	-1.64198
ENSMUSG00000037703.14	58.7723	122.282	-1.048	0.997231	-1.057
ENSMUSG00000051285.17	527.301	841.226	-1.20435	0.99723	-0.673866
ENSMUSG00000039270.9	351.243	533.806	-1.04785	0.997225	-0.603847
ENSMUSG00000036199.9	54.3209	131.404	-1.04772	0.997219	-1.27443
ENSMUSG00000111640.1	37.8183	85.6963	-1.0477	0.997219	-1.18015
ENSMUSG00000032504.15	1205.73	793.145	1.50328	0.997182	0.604252
ENSMUSG00000012114.17	115.441	286.935	-1.20539	0.997156	-1.31356
ENSMUSG00000038546.9	166.832	328.242	-1.20579	0.997128	-0.976363
ENSMUSG00000023913.17	193.847	421.43	-1.24786	0.997099	-1.12038
ENSMUSG00000023087.15	4451.17	3327.98	1.56927	0.997096	0.419538
ENSMUSG00000063077.15	12983.7	10522.8	1.43796	0.997074	0.303181
ENSMUSG00000066149.11	44.7012	126.416	-1.24735	0.99707	-1.49979
ENSMUSG00000028059.16	1637.97	1103.3	1.5229	0.997066	0.570081
ENSMUSG00000000594.7	182.933	337.604	-1.04351	0.997062	-0.884011
ENSMUSG00000024413.14	2851.09	1981.05	1.51003	0.997041	0.525245
ENSMUSG00000032834.11	17.305	44.218	-1.04265	0.997032	-1.35345
ENSMUSG00000037174.18	453.133	673.723	-1.04258	0.997029	-0.572222
ENSMUSG00000041298.15	336.529	542.916	-1.04253	0.997028	-0.689996
ENSMUSG00000027223.15	2304.24	1592.79	1.51772	0.997009	0.53273
ENSMUSG00000057134.6	1802.5	1153.63	1.51749	0.997008	0.643815
ENSMUSG00000030704.14	825.828	1191.32	-1.0416	0.996995	-0.528644
ENSMUSG00000052214.9	27.6921	110.353	-1.20779	0.996991	-1.99458
ENSMUSG00000032812.18	470.379	259.151	1.32169	0.996963	0.860032
ENSMUSG00000020758.15	541.999	298.034	1.32436	0.996963	0.862812
ENSMUSG00000023805.17	1455.52	981.755	1.32064	0.99696	0.568095
ENSMUSG00000026748.13	1422.02	939.262	1.31803	0.996941	0.598344
ENSMUSG00000052430.15	68.3408	167.466	-1.03998	0.99694	-1.29305
ENSMUSG00000027238.17	839.634	545.292	1.31456	0.99689	0.622731
ENSMUSG00000035441.14	1459.54	980.411	1.33533	0.996884	0.574058
ENSMUSG00000031232.17	585.07	312.382	1.33594	0.996879	0.905297
ENSMUSG00000047417.18	61.1161	178.432	-1.24391	0.996875	-1.54575
ENSMUSG00000042570.14	32.9724	80.5017	-1.20963	0.99687	-1.28776
ENSMUSG00000037625.7	7622.95	5597.39	1.34097	0.996846	0.445595
ENSMUSG00000033769.16	2002.27	1419.85	1.34123	0.996844	0.495903
ENSMUSG00000020385.16	832.725	499.116	1.35025	0.996822	0.738466
ENSMUSG00000029436.9	34.3876	78.4594	-1.03619	0.996817	-1.19006
ENSMUSG00000040479.12	233.875	395.224	-1.03608	0.996813	-0.756934
ENSMUSG00000029328.15	1354.01	946.205	1.35706	0.99681	0.517008
ENSMUSG00000069014.4	67.2556	315.893	-1.03495	0.996777	-2.23171
ENSMUSG00000074865.11	29.2944	105.142	-1.03487	0.996774	-1.84365
ENSMUSG00000039542.16	2959	2470.86	1.3626	0.996773	0.260093
ENSMUSG00000002205.16	40.846	118.358	-1.21158	0.99675	-1.53489
ENSMUSG00000033799.10	665.58	393.559	1.30919	0.996745	0.758033
ENSMUSG00000024780.7	3488.32	2723.39	1.30881	0.996732	0.357129
ENSMUSG00000032501.9	41.9108	99.1084	-1.03348	0.99673	-1.24169
ENSMUSG00000032131.16	24.9116	106.909	-1.24111	0.996723	-2.1015
ENSMUSG00000027993.16	2788.41	2221.15	1.30852	0.996722	0.32814
ENSMUSG00000018999.14	58.3331	134.361	-1.03315	0.99672	-1.20373
ENSMUSG00000032199.13	218.325	460.648	-1.21227	0.99671	-1.07719
ENSMUSG00000001761.7	30.9955	78.2439	-1.2123	0.996708	-1.33592
ENSMUSG00000041205.8	927.899	623.072	1.36725	0.996707	0.574568
ENSMUSG00000027375.14	10677.4	6594.48	1.57285	0.996703	0.695224
ENSMUSG00000030104.9	614.532	299.692	1.36826	0.996689	1.03601
ENSMUSG00000015090.13	4161.04	2666.03	1.30756	0.996686	0.642249
ENSMUSG00000065954.11	454.611	717.515	-1.03206	0.996685	-0.658376
ENSMUSG00000022205.15	199.578	415.411	-1.24034	0.996684	-1.05758
ENSMUSG00000018848.4	30.4135	95.8314	-1.03185	0.996678	-1.65579
ENSMUSG00000051007.15	21.4485	72.5827	-1.24014	0.996673	-1.75875
ENSMUSG00000027490.17	11.2412	3.86085	1.30678	0.996656	1.5418
ENSMUSG00000028826.14	156.987	287.143	-1.23977	0.996655	-0.871125
ENSMUSG00000022789.15	371.069	613.87	-1.03087	0.996646	-0.726248
ENSMUSG00000022505.9	36.6237	101.437	-1.23937	0.996636	-1.46974
ENSMUSG00000046160.6	2197.26	1516.03	1.43302	0.996634	0.535405
ENSMUSG00000019872.13	15.7869	104.032	-1.23921	0.996628	-2.72022
ENSMUSG00000020580.10	902.767	1331.88	-1.23909	0.996623	-0.561038
ENSMUSG00000076439.12	2526.51	1711.1	1.30576	0.996613	0.562221
ENSMUSG00000020882.17	25.041	61.379	-1.0297	0.996609	-1.29346
ENSMUSG00000025290.17	852.209	1524.92	-1.23858	0.996599	-0.839456
ENSMUSG00000028081.6	612.994	1001.26	-1.02802	0.996553	-0.707878
ENSMUSG00000029455.14	48.6408	138.577	-1.21537	0.996547	-1.51045
ENSMUSG00000028577.13	188.06	344.564	-1.21543	0.996544	-0.873576
ENSMUSG00000057738.14	1330.08	1792.06	-1.02714	0.996522	-0.430105
ENSMUSG00000022946.10	1226.13	840.82	1.16934	0.996512	0.544243
ENSMUSG00000032116.18	668.766	415.718	1.16989	0.996512	0.685898
ENSMUSG00000026421.14	3028.96	2217.61	1.16847	0.996511	0.449814
ENSMUSG00000019961.17	357.947	180.842	1.16724	0.9965	0.985013
ENSMUSG00000043969.4	5.52385	33.2855	-1.21685	0.996481	-2.59115
ENSMUSG00000030342.8	784.773	473.808	1.17331	0.996481	0.727971
ENSMUSG00000038886.10	1146.25	731.22	1.43119	0.99648	0.648543
ENSMUSG00000042404.16	321.017	148.436	1.37682	0.996461	1.1128
ENSMUSG00000020283.5	191.908	75.3945	1.37732	0.996444	1.34788
ENSMUSG00000037242.8	2707.7	1759.79	1.575	0.99644	0.621662
ENSMUSG00000028328.13	1273.04	732.04	1.43064	0.996435	0.798278
ENSMUSG00000037958.13	56.7601	149.894	-1.02461	0.996433	-1.40099
ENSMUSG00000063524.13	381.558	752.697	-1.23435	0.996426	-0.980167
ENSMUSG00000068740.13	268.728	490.788	-1.23388	0.99641	-0.868955
ENSMUSG00000038025.8	336.545	168.959	1.16279	0.996407	0.99413
ENSMUSG00000031431.13	512.966	266.578	1.37887	0.996391	0.944307
ENSMUSG00000035898.13	296.407	164.394	1.17752	0.996378	0.850426
ENSMUSG00000058392.13	24.4027	81.368	-1.23267	0.996375	-1.73742
ENSMUSG00000021134.17	1578.79	1213.48	1.17773	0.99637	0.379664
ENSMUSG00000003360.15	182.644	375.243	-1.23188	0.996353	-1.03879
ENSMUSG00000032580.12	1422.6	1019.72	1.17862	0.996341	0.480359
ENSMUSG00000033068.16	14.9328	65.3315	-1.02193	0.996333	-2.1293
ENSMUSG00000028782.14	129.085	290.491	-1.22153	0.996332	-1.17017
ENSMUSG00000002413.15	313.244	580.185	-1.22164	0.99633	-0.889228
ENSMUSG00000017781.17	250.551	471.048	-1.22166	0.996329	-0.910774
ENSMUSG00000066129.15	3020.67	2389.01	1.16062	0.996328	0.338456
ENSMUSG00000052609.9	1546.27	1162.01	1.179	0.996328	0.412172
ENSMUSG00000023999.14	68.8651	185.439	-1.02142	0.996314	-1.4291
ENSMUSG00000010453.12	67.9034	185.011	-1.22892	0.996299	-1.44605
ENSMUSG00000017631.19	330.398	631.122	-1.22843	0.996294	-0.933714
ENSMUSG00000003949.16	73.5438	198.738	-1.2244	0.996291	-1.43419
ENSMUSG00000074794.10	2766.9	1815.45	1.38257	0.996253	0.60794
ENSMUSG00000020745.15	2738.06	2348.51	1.18218	0.996195	0.221409
ENSMUSG00000031996.17	3206.41	2653.44	1.15752	0.99618	0.273093
ENSMUSG00000021114.9	206.695	364.194	-1.01792	0.99617	-0.817206
ENSMUSG00000032902.1	847.431	473.868	1.38526	0.996148	0.838611
ENSMUSG00000025584.17	1680.72	1109.44	1.38623	0.996109	0.599252
ENSMUSG00000058153.15	178.387	319.119	-1.01636	0.996102	-0.839081
ENSMUSG00000025060.15	1682.27	1269.98	1.18532	0.996044	0.40561
ENSMUSG00000044533.15	337.328	499.8	-1.01459	0.996023	-0.567199
ENSMUSG00000030616.16	2682.17	1870.62	1.15473	0.996016	0.519879
ENSMUSG00000029832.16	373.815	134.454	1.63136	0.995983	1.47521
ENSMUSG00000068923.14	5858.04	4629.1	1.18669	0.995972	0.339689
ENSMUSG00000036766.12	143.862	306.522	-1.01288	0.995945	-1.0913
ENSMUSG00000038871.5	629.043	345.48	1.29264	0.995934	0.864554
ENSMUSG00000003410.8	1836.97	1303.3	1.39118	0.995914	0.495159
ENSMUSG00000117621.1	7.14866	50.7677	-1.01143	0.995877	-2.82817
ENSMUSG00000007617.18	270.642	497.503	-1.01101	0.995857	-0.87832
ENSMUSG00000016921.14	1082.66	763.156	1.18937	0.995828	0.504538
ENSMUSG00000033184.14	1209.66	827.864	1.18983	0.995803	0.547138
ENSMUSG00000033938.5	127.416	49.4093	1.15148	0.995794	1.36669
ENSMUSG00000040606.13	1404.59	898.439	1.42068	0.995782	0.644653
ENSMUSG00000049470.13	1355.62	1676.94	-1.00907	0.995764	-0.306873
ENSMUSG00000020099.8	1468.21	957.939	1.42028	0.995763	0.616052
ENSMUSG00000033740.17	1298.79	853.357	1.39573	0.995751	0.60595
ENSMUSG00000054568.7	83.4862	27.4337	1.19119	0.995728	1.60559
ENSMUSG00000043154.15	1937.79	1333.96	1.62937	0.995724	0.538694
ENSMUSG00000001036.17	1421.22	929.468	1.28867	0.995722	0.612653
ENSMUSG00000024044.19	3194.03	2529.76	1.39747	0.995694	0.336375
ENSMUSG00000040855.15	147.081	300.933	-1.0074	0.995685	-1.03283
ENSMUSG00000022961.18	5020.99	4211.12	1.39803	0.995678	0.253769
ENSMUSG00000031447.7	2764.36	1911.73	1.14937	0.995635	0.532062
ENSMUSG00000021375.11	1324.69	893.11	1.41607	0.995606	0.568747
ENSMUSG00000076432.13	3584.21	2388.98	1.40113	0.995597	0.585261
ENSMUSG00000038143.16	1462.99	1048.87	1.41562	0.995594	0.480086
ENSMUSG00000027577.14	3.92511	26.4443	-1.00531	0.995586	-2.75215
ENSMUSG00000060477.14	61.1838	126.675	-1.00526	0.995583	-1.04991
ENSMUSG00000055065.7	2844.3	2215.49	1.14866	0.99558	0.360448
ENSMUSG00000032841.15	718.41	427.685	1.40196	0.995579	0.748257
ENSMUSG00000031930.11	190.422	74.1749	1.19425	0.995561	1.3602
ENSMUSG00000070733.13	3047.93	2536.29	1.19427	0.99556	0.265109
ENSMUSG00000034574.10	2956.69	2193.3	1.4043	0.995538	0.430876
ENSMUSG00000030788.16	1442.35	862.427	1.40454	0.995535	0.741946
ENSMUSG00000008734.9	2110.12	1532.82	1.41243	0.99553	0.461139
ENSMUSG00000042662.16	286.581	133.105	1.40691	0.995511	1.10638
ENSMUSG00000028519.16	112.577	232.188	-1.00359	0.995506	-1.04438
ENSMUSG00000081534.3	1002.83	639.584	1.1476	0.995496	0.648868
ENSMUSG00000021273.11	205.497	337.902	-1.00295	0.995477	-0.717487
ENSMUSG00000011832.16	710.562	477.905	1.14727	0.995469	0.572238
ENSMUSG00000074212.7	662.946	896.769	-1.00251	0.995457	-0.435845
ENSMUSG00000030994.16	892.459	525.121	1.28276	0.995443	0.765135
ENSMUSG00000021366.8	339.378	517.432	-1.00105	0.995393	-0.608477
ENSMUSG00000025571.13	357.643	564.209	-0.999957	0.995347	-0.657707
ENSMUSG00000022867.11	420.539	634.212	-0.999471	0.995327	-0.592724
ENSMUSG00000027367.16	219.155	389.022	-0.998984	0.995307	-0.8279
ENSMUSG00000037519.17	338.96	560.388	-0.998008	0.99527	-0.725311
ENSMUSG00000033295.14	369.337	578.339	-0.99721	0.99524	-0.646976
ENSMUSG00000033722.9	255.653	101.313	1.27604	0.995205	1.33537
ENSMUSG00000024238.15	253.653	423.579	-0.956007	0.995204	-0.739776
ENSMUSG00000062044.16	48.1388	118.694	-0.956363	0.995203	-1.30197
ENSMUSG00000057156.10	16.5477	49.2748	-0.95294	0.995202	-1.57422
ENSMUSG00000061689.15	121.435	266.864	-0.957102	0.995201	-1.13593
ENSMUSG00000038462.3	107.648	203.08	-0.951292	0.995196	-0.915724
ENSMUSG00000052534.15	240.925	445.89	-0.95837	0.995195	-0.888102
ENSMUSG00000111939.1	73.7684	168.519	-0.94995	0.995186	-1.19183
ENSMUSG00000051427.14	31.7132	81.8297	-0.960209	0.995183	-1.36754
ENSMUSG00000051375.15	150.594	278.692	-0.960347	0.995182	-0.888001
ENSMUSG00000020257.13	199.084	354.593	-0.995228	0.995171	-0.832786
ENSMUSG00000032621.8	520.277	755.996	-0.96169	0.99517	-0.539098
ENSMUSG00000050619.14	38.3463	108.738	-0.962122	0.995166	-1.5037
ENSMUSG00000022849.5	26.9766	80.9838	-0.947605	0.995166	-1.58592
ENSMUSG00000029550.11	181.665	339.512	-0.947494	0.995165	-0.902181
ENSMUSG00000037259.15	129.873	261.081	-0.962239	0.995164	-1.0074
ENSMUSG00000021420.13	20.1529	63.401	-0.964045	0.995144	-1.65352
ENSMUSG00000016319.3	199.566	333.915	-0.96454	0.995138	-0.742616
ENSMUSG00000042590.17	113.689	211.59	-0.964726	0.995135	-0.896183
ENSMUSG00000031818.12	320.098	509.315	-0.944858	0.995133	-0.670043
ENSMUSG00000054604.7	211.739	429.579	-0.993816	0.995127	-1.02064
ENSMUSG00000004207.14	2599.58	3255.64	-0.993798	0.995127	-0.324659
ENSMUSG00000057322.12	263.82	489.507	-0.96566	0.995123	-0.891774
ENSMUSG00000016637.7	12.2904	44.4438	-0.965661	0.995123	-1.85445
ENSMUSG00000026821.16	1537.86	1120.95	1.143	0.995121	0.456206
ENSMUSG00000057378.15	27.3162	105.072	-0.943839	0.995118	-1.94355
ENSMUSG00000020021.4	132.921	271.258	-0.966305	0.995115	-1.0291
ENSMUSG00000006356.10	27.8055	78.8707	-0.993159	0.995108	-1.50412
ENSMUSG00000038965.17	556.048	289.332	1.62443	0.995108	0.942485
ENSMUSG00000052456.9	34.0822	95.6004	-0.942832	0.995104	-1.488
ENSMUSG00000006215.12	16.7485	47.0274	-0.992984	0.995103	-1.48947
ENSMUSG00000001630.13	40.8545	118.637	-0.942618	0.9951	-1.53799
ENSMUSG00000002265.17	715.754	1127.72	-0.941488	0.995083	-0.655874
ENSMUSG00000019907.10	766.4	1070.6	-0.941338	0.99508	-0.482245
ENSMUSG00000019806.13	465.032	254.839	1.14246	0.995077	0.867746
ENSMUSG00000002580.7	17.9839	69.7824	-0.940926	0.995074	-1.95615
ENSMUSG00000038576.15	83.4591	187.902	-0.940782	0.995071	-1.17084
ENSMUSG00000049804.9	73.4954	178.806	-0.96941	0.99507	-1.28267
ENSMUSG00000026787.3	22.2221	105.106	-0.969486	0.995069	-2.24178
ENSMUSG00000045667.14	26.9689	88.8529	-0.991467	0.995065	-1.72012
ENSMUSG00000012609.19	1379.98	901.167	1.20517	0.995061	0.614785
ENSMUSG00000052544.9	530.333	300.046	1.14218	0.995054	0.821715
ENSMUSG00000022957.20	382.484	661.417	-0.990807	0.995049	-0.790162
ENSMUSG00000028495.14	943.628	1542.87	-0.939269	0.995046	-0.709327
ENSMUSG00000062070.12	398.89	678.123	-0.990609	0.995044	-0.765554
ENSMUSG00000030852.18	12.9151	55.2167	-0.971307	0.995043	-2.09604
ENSMUSG00000030428.16	1164.98	1557.77	-0.939022	0.995042	-0.419175
ENSMUSG00000059974.10	159.085	311.816	-0.972264	0.995029	-0.970896
ENSMUSG00000020932.14	100.804	328.575	-0.937939	0.995023	-1.70466
ENSMUSG00000030279.15	157.489	305.917	-0.937691	0.995019	-0.957889
ENSMUSG00000091512.5	42.3889	107.126	-0.973603	0.995012	-1.33754
ENSMUSG00000040524.9	453.319	642.432	-0.974461	0.995001	-0.503017
ENSMUSG00000027778.15	168.269	313.717	-0.974824	0.994997	-0.898695
ENSMUSG00000020964.14	827.064	1075.83	-0.975019	0.994995	-0.37938
ENSMUSG00000028809.16	1382.52	978.694	1.2072	0.994995	0.498368
ENSMUSG00000025268.15	52.2876	103.476	-0.936219	0.994994	-0.984763
ENSMUSG00000058230.12	798.09	1134.26	-0.975367	0.994991	-0.507134
ENSMUSG00000022995.16	593.223	856.081	-0.935811	0.994987	-0.529173
ENSMUSG00000037885.18	51.5222	117.803	-0.976343	0.99498	-1.19311
ENSMUSG00000054477.16	56.2652	113.845	-0.986444	0.994976	-1.01676
ENSMUSG00000036580.15	1244.72	859.924	1.25399	0.994972	0.533543
ENSMUSG00000034210.14	1871.46	1304.24	1.25251	0.99497	0.520951
ENSMUSG00000049076.12	2121.12	1555.67	1.25247	0.99497	0.447291
ENSMUSG00000032443.17	5.50456	23.1734	-0.934663	0.994967	-2.07377
ENSMUSG00000003038.15	418.812	195.829	1.24919	0.994964	1.09671
ENSMUSG00000033998.9	48.72	109.523	-0.97843	0.994963	-1.16864
ENSMUSG00000030811.14	20.172	67.2696	-0.979488	0.994958	-1.7376
ENSMUSG00000047193.16	255.564	440.173	-0.983866	0.994957	-0.784387
ENSMUSG00000053702.16	135.688	287.765	-0.983712	0.994956	-1.0846
ENSMUSG00000042447.13	45.0287	109.67	-0.979944	0.994955	-1.28425
ENSMUSG00000037071.3	3318.73	5471.62	-0.980654	0.994953	-0.721335
ENSMUSG00000029064.15	985.997	1273.35	-0.982883	0.994953	-0.368975
ENSMUSG00000078923.10	105.001	200.975	-0.981304	0.994952	-0.936616
ENSMUSG00000026384.13	305.302	492.277	-0.981331	0.994952	-0.689233
ENSMUSG00000026812.16	382.212	585.842	-0.98171	0.994952	-0.61614
ENSMUSG00000033949.12	631.79	357.374	1.24413	0.994948	0.822009
ENSMUSG00000005682.9	114.634	213.185	-0.933254	0.994943	-0.895065
ENSMUSG00000025591.6	303.941	126.712	1.24302	0.994943	1.26224
ENSMUSG00000054648.8	250.983	118.557	1.20965	0.994927	1.08201
ENSMUSG00000043456.17	1391.44	1031.6	1.20996	0.99492	0.431684
ENSMUSG00000028680.14	293.796	138.164	1.21075	0.994903	1.08843
ENSMUSG00000021708.17	21.268	74.1277	-0.929811	0.994889	-1.80133
ENSMUSG00000075069.3	29.4465	7.12486	1.21219	0.994874	2.04716
ENSMUSG00000030016.14	1814.92	1331	1.23366	0.994874	0.447392
ENSMUSG00000025404.15	505.279	715.797	-0.927804	0.99486	-0.502471
ENSMUSG00000041297.8	638.141	400.192	1.23194	0.994859	0.673183
ENSMUSG00000027805.16	413.732	614.89	-0.927191	0.994852	-0.57163
ENSMUSG00000094910.1	24.091	73.1423	-0.927098	0.99485	-1.60221
ENSMUSG00000025428.15	684.331	991.934	-0.926906	0.994848	-0.535551
ENSMUSG00000038733.14	654.124	854.948	-0.925938	0.994836	-0.386273
ENSMUSG00000031858.16	603.235	344.856	1.21486	0.994834	0.806727
ENSMUSG00000022051.15	1627.52	1014.01	1.21517	0.994831	0.682604
ENSMUSG00000057113.13	677.043	1091.42	-0.925336	0.994829	-0.688894
ENSMUSG00000073702.11	253.668	529.095	-0.925313	0.994828	-1.06059
ENSMUSG00000066113.16	376.287	196.557	1.21547	0.994827	0.936881
ENSMUSG00000021288.19	1245.73	1773.4	-0.924827	0.994822	-0.509524
ENSMUSG00000018166.8	1027.35	709.781	1.21593	0.994822	0.533478
ENSMUSG00000036109.17	25.0821	65.42	-0.924456	0.994818	-1.38307
ENSMUSG00000023852.14	589.855	311.326	1.22666	0.994817	0.921934
ENSMUSG00000017404.12	506.095	836.537	-0.924094	0.994815	-0.725021
ENSMUSG00000028412.17	3749.11	2737.35	1.22552	0.994811	0.453767
ENSMUSG00000058267.13	27.5296	62.281	-0.923335	0.994807	-1.17781
ENSMUSG00000022462.7	4225.22	3275.66	1.2214	0.994798	0.367242
ENSMUSG00000027858.13	10681.5	7850.26	1.22155	0.994798	0.444302
ENSMUSG00000031983.7	411.32	635.841	-0.918157	0.994766	-0.628405
ENSMUSG00000078427.3	59.6471	116.957	-0.918093	0.994765	-0.971456
ENSMUSG00000046230.11	334.727	535.046	-0.914991	0.994751	-0.676678
ENSMUSG00000041025.15	11.1884	38.1755	-0.896472	0.994749	-1.77064
ENSMUSG00000051343.11	60.0018	119.843	-0.895244	0.994748	-0.998065
ENSMUSG00000029534.17	35.518	74.1736	-0.89499	0.994748	-1.06235
ENSMUSG00000021792.15	147.208	276.129	-0.894732	0.994748	-0.907489
ENSMUSG00000087408.10	24.2358	67.7831	-0.894693	0.994748	-1.48379
ENSMUSG00000031993.7	130.912	240.032	-0.913674	0.994747	-0.874629
ENSMUSG00000027357.16	24.8198	76.8022	-0.900504	0.994747	-1.62966
ENSMUSG00000027746.13	158.538	291.343	-0.91349	0.994747	-0.877894
ENSMUSG00000028419.5	285.391	442.258	-0.901264	0.994746	-0.631948
ENSMUSG00000019923.14	246.823	447.769	-0.913226	0.994746	-0.85928
ENSMUSG00000046312.4	112.481	213.315	-0.892885	0.994745	-0.923304
ENSMUSG00000027030.15	591.283	838.789	-0.903146	0.994744	-0.504458
ENSMUSG00000034156.16	149.155	293.946	-0.90438	0.994743	-0.97874
ENSMUSG00000025862.14	18468.3	26651.1	-0.911607	0.994743	-0.529141
ENSMUSG00000066406.16	309.608	448.776	-0.911492	0.994743	-0.535554
ENSMUSG00000036188.4	44.3197	99.6854	-0.905264	0.994742	-1.16943
ENSMUSG00000021838.17	714.828	1141.49	-0.910985	0.994742	-0.675246
ENSMUSG00000032306.14	24.8924	53.6689	-0.910714	0.994742	-1.10838
ENSMUSG00000028416.13	112.361	235.436	-0.906362	0.994742	-1.06719
ENSMUSG00000054640.15	1054.56	1406.98	-0.906391	0.994742	-0.415964
ENSMUSG00000021540.16	273.068	414.923	-0.91019	0.994741	-0.603583
ENSMUSG00000047459.14	178.125	294.197	-0.910176	0.994741	-0.723891
ENSMUSG00000020657.16	56.6554	138.72	-0.891426	0.994741	-1.29189
ENSMUSG00000107741.2	77.0101	169.185	-0.907847	0.994741	-1.13549
ENSMUSG00000037210.16	372.204	523.743	-0.890943	0.994739	-0.492767
ENSMUSG00000027651.16	141.851	234.217	-0.889896	0.994735	-0.723469
ENSMUSG00000006019.15	22.5026	47.9725	-0.889351	0.994733	-1.09211
ENSMUSG00000028333.10	501.125	912.768	-0.889174	0.994732	-0.865076
ENSMUSG00000035776.14	93.0297	182.58	-0.888597	0.994728	-0.972762
ENSMUSG00000032998.16	128.958	251.065	-0.888218	0.994726	-0.961164
ENSMUSG00000020922.11	119.594	226.688	-0.888084	0.994725	-0.922564
ENSMUSG00000020402.11	230.275	383.379	-0.887944	0.994725	-0.735414
ENSMUSG00000044792.7	228.073	358.491	-0.887805	0.994724	-0.652446
ENSMUSG00000066232.4	476.711	725.751	-0.887504	0.994722	-0.606361
ENSMUSG00000026404.12	13.6234	31.1097	-0.88707	0.994719	-1.19127
ENSMUSG00000022477.13	807.07	1152.08	-0.886838	0.994717	-0.513471
ENSMUSG00000005575.16	95.636	194.018	-0.885188	0.994703	-1.02057
ENSMUSG00000016664.16	99.9947	181.154	-0.88462	0.994697	-0.857291
ENSMUSG00000020163.12	67.8476	128.333	-0.884574	0.994697	-0.919519
ENSMUSG00000036046.14	2715.07	1919.36	1.90344	0.994679	0.500361
ENSMUSG00000035674.13	57.775	119.658	-0.882503	0.994673	-1.0504
ENSMUSG00000004934.14	45.0419	97.0822	-0.880904	0.99465	-1.10794
ENSMUSG00000037754.13	3707.29	2612.83	1.58897	0.994643	0.504755
ENSMUSG00000034602.15	1395.57	1006.49	1.13683	0.994632	0.471524
ENSMUSG00000030393.8	13.6448	49.0145	-0.877835	0.994597	-1.84486
ENSMUSG00000018322.10	134.244	219.198	-0.876472	0.994569	-0.707376
ENSMUSG00000033006.10	1540.4	1070.01	1.13522	0.994514	0.525681
ENSMUSG00000006651.8	6756.4	5367.52	1.13487	0.99449	0.331999
ENSMUSG00000008730.17	771.881	1002.97	-0.872206	0.994461	-0.377825
ENSMUSG00000020474.11	17.6834	51.7057	-0.872196	0.99446	-1.54792
ENSMUSG00000022150.16	243.337	446.563	-0.871581	0.994443	-0.87591
ENSMUSG00000094472.1	718.701	1045.29	-0.871498	0.99444	-0.540438
ENSMUSG00000022186.14	380.198	565.649	-0.871189	0.994432	-0.573155
ENSMUSG00000021097.15	3134.77	2340.99	1.59097	0.994428	0.421242
ENSMUSG00000029638.17	406.672	642.642	-0.869574	0.99438	-0.660149
ENSMUSG00000020462.14	192.375	320.693	-0.867863	0.994323	-0.737274
ENSMUSG00000018459.15	10.1674	35.9961	-0.867441	0.994308	-1.82389
ENSMUSG00000055421.8	4761.61	3712.83	1.61669	0.994298	0.358932
ENSMUSG00000030007.8	216.461	362.431	-0.866787	0.994285	-0.743601
ENSMUSG00000026778.13	669.842	428.003	1.13155	0.994269	0.646201
ENSMUSG00000027942.17	144.218	245.859	-0.86561	0.994241	-0.769578
ENSMUSG00000037419.9	1862.84	1239.75	1.13067	0.994218	0.587458
ENSMUSG00000033308.16	57.1163	119.219	-0.864676	0.994205	-1.06164
ENSMUSG00000006782.16	9188.51	5808.87	1.90113	0.994166	0.661574
ENSMUSG00000038388.14	81.7233	205.698	-0.862597	0.994122	-1.33171
ENSMUSG00000019841.15	741.615	490.813	0.87618	0.994116	0.595499
ENSMUSG00000001552.14	688.26	479.769	0.876265	0.994115	0.520612
ENSMUSG00000073680.2	3998.19	2795.42	1.61441	0.994112	0.516282
ENSMUSG00000033577.18	4213.66	3535.29	0.876724	0.994111	0.253246
ENSMUSG00000075590.4	1872.67	1511.9	0.877068	0.994108	0.308728
ENSMUSG00000075091.5	9.33583	27.0371	-0.862226	0.994107	-1.53409
ENSMUSG00000028042.15	142.841	70.1282	0.87253	0.994099	1.02635
ENSMUSG00000033032.15	321.97	183.237	0.878562	0.99409	0.813221
ENSMUSG00000030298.10	190.513	85.8114	0.878628	0.994089	1.15065
ENSMUSG00000015656.17	5592.83	4941.34	0.878662	0.994088	0.178675
ENSMUSG00000018398.18	1819.84	1434.83	0.871491	0.994082	0.342927
ENSMUSG00000044453.5	233.957	138.753	0.879159	0.994079	0.753724
ENSMUSG00000018171.9	1059.26	773.437	0.879289	0.994076	0.453704
ENSMUSG00000023977.15	1102.56	842.53	0.87997	0.994063	0.38806
ENSMUSG00000068798.10	1084.66	750.735	0.870626	0.994062	0.530869
ENSMUSG00000002210.11	83.322	42.8172	0.870537	0.994059	0.960507
ENSMUSG00000025225.15	104.538	37.9936	0.880421	0.994053	1.4602
ENSMUSG00000038535.17	966.46	1323.56	-0.860569	0.994038	-0.45364
ENSMUSG00000070871.10	264.063	129.559	1.12725	0.994035	1.02728
ENSMUSG00000028556.15	106.485	219.367	-0.860363	0.994029	-1.04269
ENSMUSG00000025503.5	776.55	452.597	1.12653	0.994003	0.778853
ENSMUSG00000052229.5	553.12	882.605	-0.859371	0.993986	-0.674176
ENSMUSG00000024797.14	161.295	95.5694	0.883913	0.993946	0.755085
ENSMUSG00000020719.14	5136.24	4389.46	0.866964	0.993934	0.22667
ENSMUSG00000040234.16	583.953	345.75	1.12481	0.993931	0.756123
ENSMUSG00000030795.18	1448	1116.3	0.884418	0.993928	0.375345
ENSMUSG00000025241.16	484.373	716.273	-0.857675	0.993913	-0.56439
ENSMUSG00000025332.14	459.571	293.949	0.885249	0.993894	0.644719
ENSMUSG00000026447.17	1515.01	1115.75	0.866108	0.993894	0.441307
ENSMUSG00000023010.15	1387	1062.09	0.865751	0.993877	0.385054
ENSMUSG00000056856.13	610.452	276.118	1.61045	0.993869	1.14459
ENSMUSG00000002222.14	808.409	571.676	0.865523	0.993864	0.499889
ENSMUSG00000040387.16	33.3421	73.0749	-0.856045	0.993841	-1.13203
ENSMUSG00000029916.11	34.8002	87.8903	-0.855854	0.993833	-1.33661
ENSMUSG00000028565.18	1425.18	1151.59	0.864845	0.993825	0.307517
ENSMUSG00000024039.15	87.8432	164.895	-0.855352	0.993811	-0.908542
ENSMUSG00000023026.16	2446.9	1756.7	1.12037	0.99379	0.478091
ENSMUSG00000026014.15	175.831	294.63	-0.854782	0.993786	-0.744715
ENSMUSG00000027678.17	1064.82	630.394	1.60044	0.99378	0.756285
ENSMUSG00000030088.15	71.7569	143.205	-0.854613	0.993779	-0.996894
ENSMUSG00000019877.10	2477.04	1970.02	0.887929	0.993777	0.330408
ENSMUSG00000069808.13	357.857	143.534	1.60062	0.993775	1.31799
ENSMUSG00000024054.14	451.706	655.662	-0.854516	0.993774	-0.53757
ENSMUSG00000054364.5	3045.75	2053.57	1.60096	0.993763	0.568663
ENSMUSG00000049721.14	212.042	341.506	-0.853898	0.993748	-0.687562
ENSMUSG00000030772.6	37.0967	88.7451	-0.853839	0.993745	-1.25838
ENSMUSG00000021573.15	4426.61	3259.26	1.60664	0.993741	0.441655
ENSMUSG00000026623.16	1084.59	797.608	1.11807	0.99374	0.443399
ENSMUSG00000026519.16	1922.27	1263.27	1.60358	0.993717	0.605648
ENSMUSG00000028550.15	625.703	389.194	1.11592	0.993707	0.684987
ENSMUSG00000020473.13	227.921	120.973	0.862494	0.993676	0.913854
ENSMUSG00000057236.10	576.54	399.593	0.862393	0.993669	0.528887
ENSMUSG00000058070.14	1036.08	782.219	0.862344	0.993666	0.405498
ENSMUSG00000038526.14	495.546	285.382	1.1105	0.993661	0.796125
ENSMUSG00000041444.14	813.936	1085.17	-0.851865	0.99366	-0.414927
ENSMUSG00000031748.16	3872.32	3253.17	1.10487	0.993638	0.251352
ENSMUSG00000034075.10	180.537	86.7389	1.10289	0.993627	1.05754
ENSMUSG00000028397.13	276.654	155.521	1.10237	0.993623	0.830974
ENSMUSG00000029207.16	1117.81	826.069	1.10211	0.993621	0.436343
ENSMUSG00000024816.12	629.35	395	1.10206	0.993621	0.672011
ENSMUSG00000058325.6	1516.61	1119.33	1.10084	0.99361	0.438208
ENSMUSG00000022526.8	30.1237	65.1989	-0.85055	0.993604	-1.11395
ENSMUSG00000031988.10	136.565	233.194	-0.850487	0.993601	-0.771945
ENSMUSG00000020358.17	455.244	308.166	0.861241	0.993586	0.562932
ENSMUSG00000024335.20	1119.89	828.142	0.861175	0.993581	0.435407
ENSMUSG00000047045.17	36.4632	84.6763	-0.849821	0.993574	-1.21552
ENSMUSG00000020108.4	234.24	97.7164	1.0975	0.993564	1.26132
ENSMUSG00000003458.12	260.855	141.777	1.09744	0.993563	0.879621
ENSMUSG00000021983.16	103.74	218.68	-0.849519	0.993562	-1.07586
ENSMUSG00000025261.18	3943.17	3362.68	1.09678	0.993552	0.229743
ENSMUSG00000021811.7	72.9812	30.4413	0.860561	0.993532	1.26149
ENSMUSG00000018965.11	250.075	401.845	-0.848706	0.993529	-0.68428
ENSMUSG00000037736.20	2375.36	1930.09	1.09489	0.99351	0.299478
ENSMUSG00000036323.14	317.996	454.573	-0.848023	0.993502	-0.515504
ENSMUSG00000048410.17	329.505	204.356	0.860106	0.993496	0.689219
ENSMUSG00000001833.17	7299.91	6174.82	1.09398	0.993487	0.241482
ENSMUSG00000005161.15	81.0713	158.015	-0.847372	0.993476	-0.962803
ENSMUSG00000027167.11	65.5948	125.471	-0.846948	0.99346	-0.935697
ENSMUSG00000020366.18	273.27	415.943	-0.846401	0.993439	-0.606059
ENSMUSG00000041164.15	335.8	474.529	-0.846398	0.993439	-0.498892
ENSMUSG00000028525.16	2547	2053.06	0.894446	0.993438	0.311021
ENSMUSG00000041895.15	527.721	328.956	0.89465	0.993427	0.68188
ENSMUSG00000032036.15	66.1995	131.524	-0.845547	0.993408	-0.990433
ENSMUSG00000039568.6	400.896	210.693	1.09123	0.9934	0.928086
ENSMUSG00000024560.7	56.3624	122.696	-0.845221	0.993396	-1.12228
ENSMUSG00000003452.15	930.801	704.429	0.89523	0.993394	0.402017
ENSMUSG00000075383.4	80.5493	30.5632	1.09056	0.993376	1.39807
ENSMUSG00000039361.11	3275.03	2717.7	0.858304	0.993343	0.269123
ENSMUSG00000021770.11	842.288	629.078	0.857963	0.993313	0.421075
ENSMUSG00000020570.15	1156.8	790.228	1.08899	0.993312	0.549794
ENSMUSG00000033400.14	276.348	436.142	-0.842165	0.993292	-0.658312
ENSMUSG00000021830.14	1529.53	1255.4	0.897231	0.99328	0.284935
ENSMUSG00000038271.17	593.226	386.006	0.897589	0.99326	0.619957
ENSMUSG00000006273.14	372.924	540.348	-0.839892	0.993224	-0.535007
ENSMUSG00000022199.12	521.233	752.055	-0.83943	0.993212	-0.52891
ENSMUSG00000024608.11	196.795	341.833	-0.838986	0.9932	-0.7966
ENSMUSG00000007659.18	619.392	445.353	0.856628	0.993188	0.475904
ENSMUSG00000037509.21	196.853	301.906	-0.838392	0.993185	-0.616983
ENSMUSG00000053046.16	259.376	392.366	-0.838039	0.993176	-0.597158
ENSMUSG00000026223.15	323.805	474.449	-0.837132	0.993155	-0.551125
ENSMUSG00000030166.14	98.0471	213.86	-0.836878	0.993149	-1.12512
ENSMUSG00000021376.11	24.133	63.3665	-0.792707	0.993149	-1.39271
ENSMUSG00000015829.13	1690.49	2153.2	-0.792503	0.993149	-0.349035
ENSMUSG00000037553.14	20.6033	53.4833	-0.792429	0.993149	-1.37621
ENSMUSG00000040354.14	45.1423	87.1331	-0.790896	0.993148	-0.948741
ENSMUSG00000030934.9	133.693	231.516	-0.790818	0.993148	-0.792184
ENSMUSG00000113961.1	448.167	669.961	-0.794277	0.993146	-0.580042
ENSMUSG00000019861.15	142.749	226.76	-0.794471	0.993146	-0.667678
ENSMUSG00000042599.8	400.898	570.278	-0.788601	0.993144	-0.508431
ENSMUSG00000035275.14	36.6163	78.2232	-0.79635	0.993141	-1.09511
ENSMUSG00000022538.20	61.2872	121.841	-0.787533	0.99314	-0.991341
ENSMUSG00000013698.12	1653.43	2467.17	-0.79747	0.993137	-0.577399
ENSMUSG00000024083.16	882.665	1141.37	-0.797812	0.993135	-0.370828
ENSMUSG00000020315.18	6266.28	7888.89	-0.785948	0.993132	-0.332213
ENSMUSG00000001767.5	88.931	166.562	-0.798693	0.993131	-0.9053
ENSMUSG00000005469.10	163.327	246.614	-0.799125	0.993129	-0.594491
ENSMUSG00000022474.15	66.7808	128.118	-0.799448	0.993127	-0.939964
ENSMUSG00000021986.9	871.793	1100.28	-0.784481	0.993123	-0.335816
ENSMUSG00000017493.12	32.6156	87.4094	-0.835694	0.993123	-1.42223
ENSMUSG00000034501.7	26.367	63.1644	-0.800271	0.993122	-1.26038
ENSMUSG00000022614.8	80.4707	143.027	-0.800327	0.993122	-0.829752
ENSMUSG00000102918.1	158.049	313.771	-0.83563	0.993122	-0.98934
ENSMUSG00000026333.14	61.9148	150.788	-0.783695	0.993117	-1.28417
ENSMUSG00000020022.17	106.4	197.018	-0.783194	0.993113	-0.888826
ENSMUSG00000032212.10	774.94	570.571	0.855839	0.993112	0.441678
ENSMUSG00000025733.17	113.738	210.769	-0.802697	0.993107	-0.889947
ENSMUSG00000006205.13	494.246	703.662	-0.803752	0.9931	-0.509653
ENSMUSG00000038866.15	69.8218	152.314	-0.80407	0.993097	-1.1253
ENSMUSG00000026275.13	205.291	304.391	-0.804309	0.993096	-0.568256
ENSMUSG00000047888.10	922.721	1165.62	-0.805127	0.99309	-0.337126
ENSMUSG00000020828.13	75.734	130.306	-0.780462	0.993088	-0.782886
ENSMUSG00000039706.11	19.4453	56.2316	-0.806124	0.993082	-1.53196
ENSMUSG00000029203.16	421.72	600.655	-0.806541	0.993079	-0.51025
ENSMUSG00000061353.11	27.2106	92.7091	-0.806725	0.993078	-1.76854
ENSMUSG00000035770.8	1819.21	2703.02	-0.832964	0.993074	-0.571261
ENSMUSG00000032330.7	80.0659	163.685	-0.778985	0.993072	-1.03167
ENSMUSG00000028184.12	46.3098	106.427	-0.807578	0.993071	-1.20048
ENSMUSG00000061787.15	222.371	407.558	-0.778713	0.993069	-0.874036
ENSMUSG00000000149.10	2431.21	1925.24	0.900959	0.993066	0.336639
ENSMUSG00000059970.7	129.182	236.699	-0.778364	0.993065	-0.873642
ENSMUSG00000038160.7	18.5882	47.3986	-0.808573	0.993064	-1.35046
ENSMUSG00000055675.6	125.891	234.673	-0.80955	0.993056	-0.898477
ENSMUSG00000019852.7	137.088	322.995	-0.809739	0.993055	-1.23641
ENSMUSG00000029020.13	220.171	345.053	-0.777117	0.993049	-0.648193
ENSMUSG00000027333.18	90.5287	164.171	-0.810547	0.993049	-0.858752
ENSMUSG00000078570.10	9.72689	24.374	-0.77675	0.993044	-1.32529
ENSMUSG00000086583.3	336.649	578.247	-0.829825	0.993032	-0.780442
ENSMUSG00000007836.6	139.7	259.81	-0.813246	0.993029	-0.895125
ENSMUSG00000029108.14	372.223	626.783	-0.775546	0.993028	-0.751799
ENSMUSG00000032320.7	264.41	424.218	-0.828807	0.993024	-0.682029
ENSMUSG00000053644.13	114.725	203.962	-0.828082	0.993017	-0.830117
ENSMUSG00000036002.12	47.5708	88.7703	-0.815313	0.993017	-0.9
ENSMUSG00000049800.13	152.741	260.625	-0.815662	0.993015	-0.770886
ENSMUSG00000039166.16	206.248	321.422	-0.827731	0.993014	-0.640083
ENSMUSG00000026234.12	2156.51	3339.72	-0.825184	0.993001	-0.631032
ENSMUSG00000027221.5	54.5534	121.452	-0.818897	0.993001	-1.15465
ENSMUSG00000023066.10	44.6645	114.592	-0.818903	0.993001	-1.3593
ENSMUSG00000028917.14	376.726	663.983	-0.818978	0.993001	-0.817632
ENSMUSG00000044950.7	198.25	298.64	-0.824641	0.992999	-0.591088
ENSMUSG00000071644.10	248.003	460.839	-0.819651	0.992998	-0.893907
ENSMUSG00000030768.12	21.8805	53.9085	-0.773465	0.992998	-1.30086
ENSMUSG00000071793.12	272.031	401.509	-0.820256	0.992998	-0.561662
ENSMUSG00000033430.10	79.5045	135.774	-0.821042	0.992996	-0.7721
ENSMUSG00000002985.16	2850.48	3594.65	-0.823114	0.992996	-0.334646
ENSMUSG00000022564.7	213.187	325.297	-0.822449	0.992996	-0.609642
ENSMUSG00000062257.13	222.511	422.456	-0.822262	0.992996	-0.924925
ENSMUSG00000024176.10	1169.33	905.73	0.854648	0.992992	0.368523
ENSMUSG00000059208.15	780.471	589.017	0.85451	0.992978	0.406036
ENSMUSG00000048878.6	116.013	238.31	-0.771219	0.992963	-1.03856
ENSMUSG00000057666.18	1692.07	2088.05	-0.771156	0.992962	-0.303367
ENSMUSG00000032060.10	1832.87	1405.35	0.854348	0.992961	0.383176
ENSMUSG00000055296.14	1265.93	1020.56	0.85434	0.992961	0.310834
ENSMUSG00000068039.13	583.309	766.969	-0.770703	0.992955	-0.394908
ENSMUSG00000024985.20	336.283	531.971	-0.770301	0.992949	-0.661671
ENSMUSG00000040165.14	17.9962	45.7182	-0.769616	0.992937	-1.34507
ENSMUSG00000090362.2	392.195	555.742	-0.769188	0.99293	-0.502842
ENSMUSG00000032316.8	389.518	234.041	0.903322	0.992929	0.734925
ENSMUSG00000034681.17	130.75	223.432	-0.768535	0.992919	-0.773022
ENSMUSG00000036990.13	557.802	348.426	0.903804	0.992902	0.678901
ENSMUSG00000015305.6	875.612	1111.09	-0.76749	0.992902	-0.343606
ENSMUSG00000024583.3	62.0058	163.115	-0.76717	0.992896	-1.39542
ENSMUSG00000045215.17	466.407	298.699	1.08131	0.992896	0.642897
ENSMUSG00000022064.10	132.303	219.482	-0.767092	0.992895	-0.73026
ENSMUSG00000074102.4	82.1448	147.268	-0.766756	0.992889	-0.842199
ENSMUSG00000079038.3	73.145	153.493	-0.766078	0.992877	-1.06934
ENSMUSG00000025791.18	81.3589	152.144	-0.763678	0.992834	-0.903064
ENSMUSG00000029640.17	137.349	230.546	-0.763471	0.99283	-0.747201
ENSMUSG00000008575.17	721.849	977.053	-0.762503	0.992812	-0.43674
ENSMUSG00000027792.11	295.62	157.413	0.8529	0.99281	0.909188
ENSMUSG00000019970.15	1907.27	964.341	0.905426	0.992809	0.983892
ENSMUSG00000062867.13	36.4879	74.0602	-0.762069	0.992804	-1.02128
ENSMUSG00000016756.17	283.54	434.961	-0.761951	0.992802	-0.617333
ENSMUSG00000019916.14	150.545	245.678	-0.761058	0.992785	-0.706575
ENSMUSG00000032087.11	693.087	515.21	0.905974	0.992778	0.427876
ENSMUSG00000050840.8	405.02	259.927	0.906053	0.992774	0.639887
ENSMUSG00000067851.11	632.074	818.568	-0.760422	0.992772	-0.373009
ENSMUSG00000035133.9	1955.96	2401.49	-0.760414	0.992772	-0.296053
ENSMUSG00000035569.17	1585.47	1917.73	-0.760287	0.99277	-0.274485
ENSMUSG00000014496.8	2746.07	2113.7	1.00402	0.992765	0.377599
ENSMUSG00000051586.17	1584.27	1191.38	1.00293	0.992764	0.411184
ENSMUSG00000021258.10	215.965	114.435	1.00292	0.992764	0.91627
ENSMUSG00000029169.11	685.953	461.449	1.00529	0.992764	0.571939
ENSMUSG00000078532.9	514.761	273.411	1.00547	0.992764	0.91283
ENSMUSG00000033039.10	1718.84	1302.18	1.00608	0.992762	0.400498
ENSMUSG00000020458.16	9709.96	8175.93	1.001	0.992759	0.248082
ENSMUSG00000042408.13	384.575	213.757	1.0071	0.992757	0.847295
ENSMUSG00000071172.13	1164.52	841.671	1.00001	0.992754	0.468405
ENSMUSG00000021143.10	4843.02	3815.01	0.999834	0.992753	0.344221
ENSMUSG00000094488.2	32.1062	76.8206	-0.759427	0.992753	-1.25864
ENSMUSG00000029714.11	295.348	150.587	1.00793	0.992752	0.971821
ENSMUSG00000023186.14	227.381	100.354	0.998609	0.992745	1.18001
ENSMUSG00000061603.8	676.129	964.955	-0.758669	0.992737	-0.513165
ENSMUSG00000032012.9	640.507	423.299	0.996914	0.992732	0.597536
ENSMUSG00000031835.16	548.91	375.207	0.99686	0.992731	0.548884
ENSMUSG00000117310.2	2323.4	1781.35	0.852152	0.992729	0.383269
ENSMUSG00000032412.8	1635.75	1197.16	0.995702	0.992721	0.450331
ENSMUSG00000028926.15	209.178	355.075	-0.757827	0.99272	-0.76339
ENSMUSG00000027180.12	202.99	318.048	-0.757748	0.992719	-0.647837
ENSMUSG00000026437.11	502.321	350.646	0.852036	0.992717	0.518594
ENSMUSG00000026872.18	7262.43	6233.3	0.995138	0.992715	0.220455
ENSMUSG00000031812.16	741.719	499.491	0.995058	0.992714	0.570416
ENSMUSG00000023980.7	91.5845	34.0814	0.907237	0.992707	1.42612
ENSMUSG00000027674.16	4273.52	2758.18	1.89408	0.992698	0.631709
ENSMUSG00000059669.8	21.3177	47.148	-0.756564	0.992693	-1.14514
ENSMUSG00000008859.8	223.365	366.884	-0.756018	0.992682	-0.715916
ENSMUSG00000056493.9	278.59	180.31	0.907752	0.992678	0.627663
ENSMUSG00000047694.12	250.557	386.858	-0.755743	0.992676	-0.626664
ENSMUSG00000063659.11	312.643	469.925	-0.755685	0.992674	-0.587912
ENSMUSG00000020827.18	1282.07	854.444	1.01393	0.992672	0.58542
ENSMUSG00000008475.13	413.588	240.391	1.01423	0.992666	0.782809
ENSMUSG00000053477.17	2841.29	2377.7	0.990792	0.992662	0.25698
ENSMUSG00000024640.9	1669.48	1248.61	0.990582	0.992659	0.419072
ENSMUSG00000042429.8	478.216	293.092	0.989557	0.992644	0.706311
ENSMUSG00000035764.5	101.148	162.096	-0.754217	0.99264	-0.680381
ENSMUSG00000021706.14	516.522	313.937	0.989143	0.992638	0.718356
ENSMUSG00000028842.15	1484.76	1141.91	0.851278	0.992635	0.378777
ENSMUSG00000045294.11	780.453	515.235	0.988245	0.992624	0.599081
ENSMUSG00000024277.14	669.051	485.423	0.851051	0.992609	0.462876
ENSMUSG00000049630.6	29.5726	63.5088	-0.75293	0.992609	-1.1027
ENSMUSG00000004187.11	125.671	197.339	-0.75277	0.992605	-0.651032
ENSMUSG00000012405.16	256.423	432.167	-0.752302	0.992593	-0.753065
ENSMUSG00000074467.4	7.55297	2.00092	0.985954	0.992587	1.91638
ENSMUSG00000033365.14	780.005	569.408	1.01756	0.992584	0.454021
ENSMUSG00000060675.13	726.544	510.66	0.850779	0.992578	0.508687
ENSMUSG00000028080.16	657.955	427.92	0.98501	0.992571	0.620648
ENSMUSG00000028053.13	1259.8	1569.38	-0.751388	0.992569	-0.316999
ENSMUSG00000021939.8	1297.91	977.135	0.909763	0.992566	0.409559
ENSMUSG00000040078.9	85.9047	17.5999	0.850616	0.99256	2.28717
ENSMUSG00000031467.10	180.228	278.556	-0.750676	0.992549	-0.628143
ENSMUSG00000027130.15	675.82	415.167	0.910191	0.992543	0.702947
ENSMUSG00000028567.8	205.61	84.2335	1.07581	0.992519	1.28745
ENSMUSG00000085642.8	64.5118	18.7775	0.981504	0.992505	1.78056
ENSMUSG00000025931.15	591.468	856.084	-0.749113	0.992503	-0.533451
ENSMUSG00000024259.9	207.843	309.528	-0.748991	0.992499	-0.574576
ENSMUSG00000027575.19	281.514	148.367	1.02109	0.992469	0.924042
ENSMUSG00000046324.12	1016.54	765.916	0.979175	0.992456	0.408409
ENSMUSG00000020376.17	872.826	606.857	0.977804	0.992425	0.524336
ENSMUSG00000046962.16	244.966	118.885	0.977384	0.992415	1.04302
ENSMUSG00000068739.13	322.632	185.333	0.976979	0.992406	0.799768
ENSMUSG00000026944.18	9050.09	6441.63	2.23787	0.992397	0.490507
ENSMUSG00000027067.16	125.831	223.109	-0.745671	0.992387	-0.826265
ENSMUSG00000012535.14	338.286	200.543	0.913475	0.992365	0.754334
ENSMUSG00000000631.20	1677.32	1319.95	1.0736	0.99236	0.345672
ENSMUSG00000042046.15	572.821	383.551	0.974856	0.992354	0.578665
ENSMUSG00000079435.9	171.086	285.252	-0.744775	0.992352	-0.737509
ENSMUSG00000043384.15	393.183	650.63	-0.744115	0.992326	-0.726637
ENSMUSG00000022096.14	314.592	185.482	0.973759	0.992326	0.762204
ENSMUSG00000049001.5	26.8391	9.98246	0.973579	0.992321	1.42687
ENSMUSG00000034761.15	1200.07	848.658	0.973373	0.992315	0.499857
ENSMUSG00000037720.16	790.926	487.326	0.973317	0.992314	0.698655
ENSMUSG00000038587.10	107.395	215.453	-0.74371	0.992309	-1.00444
ENSMUSG00000027551.15	99.2652	36.4867	0.972883	0.992303	1.44392
ENSMUSG00000038902.14	440.514	281.289	0.915146	0.992278	0.647135
ENSMUSG00000024431.15	1363.1	1013.81	0.915148	0.992278	0.427104
ENSMUSG00000022438.6	272.075	390.753	-0.742764	0.992268	-0.522252
ENSMUSG00000028385.14	1287.06	993.635	0.971413	0.992262	0.373296
ENSMUSG00000040111.17	775.425	557.943	0.847788	0.99224	0.47487
ENSMUSG00000018334.18	313.791	152.878	1.02713	0.992216	1.03742
ENSMUSG00000040423.11	1110.07	789.04	0.969455	0.992205	0.492483
ENSMUSG00000046138.15	696.025	448.164	1.07135	0.992199	0.635113
ENSMUSG00000028969.10	299.594	172.982	0.968991	0.992191	0.792389
ENSMUSG00000026830.9	5724.83	4475.11	1.02766	0.992191	0.35531
ENSMUSG00000034892.8	279.071	441.093	-0.741088	0.99219	-0.660449
ENSMUSG00000027340.15	258.864	431.1	-0.740787	0.992175	-0.73583
ENSMUSG00000026238.14	4707.46	3677.8	0.96719	0.992136	0.356104
ENSMUSG00000032418.15	157.941	287.256	-0.740025	0.992135	-0.862956
ENSMUSG00000036026.15	384.886	222.69	0.84685	0.992132	0.789395
ENSMUSG00000003119.14	653.399	451.691	0.846845	0.992131	0.532628
ENSMUSG00000026024.14	265.384	128.163	1.02942	0.992107	1.0501
ENSMUSG00000000374.8	1019.1	683.345	0.966027	0.992099	0.576605
ENSMUSG00000029426.8	2104.94	1646.1	1.06979	0.992089	0.35473
ENSMUSG00000006456.10	79.3602	127.983	-0.739112	0.992087	-0.689461
ENSMUSG00000027339.15	1561.98	1198.99	0.919336	0.992069	0.381557
ENSMUSG00000038836.15	19.4747	47.4796	-0.738776	0.992068	-1.28571
ENSMUSG00000004865.16	186.226	287.561	-0.738492	0.992051	-0.626816
ENSMUSG00000028656.14	538.943	730.083	-0.738484	0.99205	-0.437928
ENSMUSG00000030306.14	96.9991	186.645	-0.738413	0.992046	-0.944252
ENSMUSG00000034981.9	129.936	216.397	-0.73826	0.992037	-0.735876
ENSMUSG00000027882.18	1015.78	649.79	1.06899	0.992035	0.644546
ENSMUSG00000074892.9	770.88	493.273	0.920087	0.992034	0.64412
ENSMUSG00000040731.13	975.574	729.898	0.963109	0.992004	0.418557
ENSMUSG00000026356.15	310.657	192.546	0.920749	0.992003	0.690119
ENSMUSG00000039976.4	498.686	314.89	0.845664	0.991995	0.663284
ENSMUSG00000079470.8	1160.51	1616.6	-0.737103	0.991969	-0.478199
ENSMUSG00000060743.12	567.454	359.732	1.03224	0.991967	0.657581
ENSMUSG00000022864.14	747.801	500.536	0.96064	0.991922	0.57918
ENSMUSG00000031833.10	1396.68	996.932	1.0336	0.9919	0.486436
ENSMUSG00000037907.16	170.845	87.3169	0.923335	0.991888	0.968358
ENSMUSG00000038936.13	929.049	652.19	0.923447	0.991883	0.510464
ENSMUSG00000000340.10	115.96	185.353	-0.735774	0.991882	-0.676642
ENSMUSG00000049493.13	1106.16	714.234	1.03403	0.991879	0.631095
ENSMUSG00000024566.10	299.697	422.582	-0.735565	0.991869	-0.495727
ENSMUSG00000008348.9	6933.57	5527.35	0.923914	0.991864	0.327009
ENSMUSG00000024457.16	125.344	201.096	-0.735363	0.991856	-0.68199
ENSMUSG00000022378.14	606.495	397.046	0.924747	0.99183	0.611187
ENSMUSG00000004677.17	633.592	401.494	1.0356	0.991803	0.658175
ENSMUSG00000057335.11	1739.54	1383.89	0.956804	0.991797	0.329976
ENSMUSG00000069670.8	995.662	687.318	1.03588	0.991789	0.534679
ENSMUSG00000041408.18	888.77	701.518	0.843482	0.991743	0.341329
ENSMUSG00000004980.16	2952.46	2535	1.06431	0.991743	0.21993
ENSMUSG00000020811.16	1394.37	1052.55	0.955019	0.991742	0.40572
ENSMUSG00000039704.7	716.936	468.06	0.927098	0.991741	0.615149
ENSMUSG00000028082.14	780.721	476.914	1.037	0.991736	0.711078
ENSMUSG00000002015.5	282.308	165.676	0.954676	0.991731	0.768899
ENSMUSG00000051329.13	277.156	164.463	0.954524	0.991726	0.752941
ENSMUSG00000037999.13	1970.42	1551.47	0.843302	0.991722	0.344872
ENSMUSG00000073982.11	792.27	508.349	1.06381	0.991714	0.640173
ENSMUSG00000021831.9	392.523	242.484	0.928338	0.991699	0.694885
ENSMUSG00000020268.14	32.6789	9.7887	0.928551	0.991692	1.73917
ENSMUSG00000022365.6	291.721	172.947	0.929104	0.991674	0.754259
ENSMUSG00000041977.18	339.683	202.273	0.929448	0.991663	0.747886
ENSMUSG00000035342.14	441.816	254.38	0.929681	0.991656	0.796459
ENSMUSG00000020576.10	1723.5	1316.64	1.06262	0.991653	0.388481
ENSMUSG00000028790.13	592.549	408.434	0.951895	0.991652	0.536832
ENSMUSG00000034751.17	2764.34	2349.47	0.951848	0.991651	0.234598
ENSMUSG00000079487.11	641.324	426.112	1.03907	0.991644	0.58982
ENSMUSG00000029004.15	1481.07	1155.32	0.95151	0.991643	0.358344
ENSMUSG00000020604.13	580.93	345.734	1.06235	0.99164	0.748702
ENSMUSG00000031576.16	13.2342	3.71438	1.0398	0.991614	1.83308
ENSMUSG00000035530.13	973.026	721.449	0.949635	0.991597	0.431582
ENSMUSG00000032913.13	403.625	248.399	0.842171	0.991593	0.70036
ENSMUSG00000078771.10	1342.56	975.057	0.842076	0.991583	0.461425
ENSMUSG00000041530.17	558.861	351.041	1.04087	0.99157	0.670852
ENSMUSG00000015536.14	55.6738	100.531	-0.731558	0.991567	-0.852566
ENSMUSG00000021671.9	172.739	68.6822	0.933386	0.991563	1.33058
ENSMUSG00000029462.18	304.66	191.856	0.933686	0.991556	0.667171
ENSMUSG00000040850.17	682.561	436.401	0.947188	0.991549	0.645302
ENSMUSG00000038861.14	271.744	130.697	0.934162	0.991548	1.05603
ENSMUSG00000046062.5	472.208	658.189	-0.731102	0.99153	-0.479081
ENSMUSG00000064325.4	1182.96	846.291	1.04225	0.99152	0.483176
ENSMUSG00000032064.17	1558.4	1237.57	0.936152	0.991517	0.332554
ENSMUSG00000034525.7	640.461	452.855	0.944986	0.991517	0.500062
ENSMUSG00000055945.8	1427.86	2144.13	-0.730902	0.991513	-0.58653
ENSMUSG00000033713.12	2779.14	2153.61	0.937443	0.991503	0.36788
ENSMUSG00000029922.15	310.206	184.18	0.943604	0.991502	0.75211
ENSMUSG00000033579.16	2001.74	1588.66	0.937951	0.991498	0.333447
ENSMUSG00000009079.16	1018.16	745.936	0.938103	0.991497	0.448843
ENSMUSG00000117357.1	43.2985	12.3684	0.841277	0.991492	1.80766
ENSMUSG00000026879.14	2053.17	1535.55	0.939287	0.991492	0.419101
ENSMUSG00000025597.13	727.877	456.717	1.05885	0.991491	0.672395
ENSMUSG00000091896.8	895.839	605.299	0.941549	0.99149	0.565592
ENSMUSG00000015165.16	1056.36	803.518	0.940889	0.991489	0.394701
ENSMUSG00000062078.15	31245.8	28014.7	1.05833	0.991473	0.157477
ENSMUSG00000063146.11	864.467	602.086	1.05805	0.991464	0.521842
ENSMUSG00000045917.17	110.347	43.6159	1.04421	0.991459	1.33912
ENSMUSG00000032118.16	2182.75	1691.8	0.840829	0.991441	0.367588
ENSMUSG00000073725.8	1434.92	1024.95	1.04482	0.991441	0.485414
ENSMUSG00000020496.10	172.042	265.847	-0.729756	0.991411	-0.627831
ENSMUSG00000075254.12	643.137	406.782	1.05584	0.991405	0.66087
ENSMUSG00000037957.14	295.306	173.917	1.05569	0.991401	0.763807
ENSMUSG00000030061.16	116.782	199.876	-0.729515	0.99139	-0.775279
ENSMUSG00000028962.14	615.918	400.683	1.05499	0.991387	0.620279
ENSMUSG00000021957.7	1231.01	871.328	1.04769	0.991381	0.49856
ENSMUSG00000030528.12	89.5855	32.6046	1.05321	0.991361	1.45819
ENSMUSG00000014226.10	165.972	269.91	-0.729084	0.991351	-0.701538
ENSMUSG00000035933.5	168.389	276.631	-0.728677	0.991313	-0.716164
ENSMUSG00000062929.8	739.003	536.295	0.839657	0.991311	0.462554
ENSMUSG00000038077.7	1574.13	1182.62	0.839615	0.991306	0.412569
ENSMUSG00000040459.11	988.66	727.071	0.83894	0.991231	0.443379
ENSMUSG00000011752.7	265.417	395.125	-0.72774	0.991221	-0.574048
ENSMUSG00000033705.17	1018.99	549.89	1.88161	0.991184	0.889931
ENSMUSG00000022680.14	854.147	640.534	0.838214	0.991153	0.415209
ENSMUSG00000054408.9	113.237	194.798	-0.727032	0.991152	-0.782633
ENSMUSG00000056124.5	111.127	193.351	-0.727023	0.991151	-0.799015
ENSMUSG00000024810.16	2262.4	1288.6	1.87845	0.991138	0.812051
ENSMUSG00000020536.12	949.818	704.133	0.837771	0.991105	0.431803
ENSMUSG00000031078.15	111.347	189.216	-0.725724	0.991014	-0.764977
ENSMUSG00000026667.14	760.252	994.18	-0.725716	0.991014	-0.38703
ENSMUSG00000049100.15	803.003	1040.53	-0.725295	0.990969	-0.373848
ENSMUSG00000026867.18	427.643	575.257	-0.725118	0.99095	-0.427801
ENSMUSG00000096544.2	15.7346	41.3109	-0.724979	0.990936	-1.39258
ENSMUSG00000105549.1	101.29	186.566	-0.72494	0.990931	-0.881196
ENSMUSG00000021819.11	291.636	414.356	-0.724937	0.990931	-0.506701
ENSMUSG00000027531.16	115.225	182.491	-0.724902	0.990927	-0.66337
ENSMUSG00000042271.13	403.26	234.757	0.835586	0.990874	0.780541
ENSMUSG00000051234.6	658.23	428.502	0.834885	0.990802	0.619289
ENSMUSG00000032563.16	151.857	56.866	0.834469	0.99076	1.41707
ENSMUSG00000033629.6	309.251	433.461	-0.722279	0.990624	-0.487125
ENSMUSG00000028134.11	463.672	620.314	-0.722087	0.990601	-0.419893
ENSMUSG00000006800.14	1033.43	783.395	0.832749	0.990589	0.399629
ENSMUSG00000024165.9	22.2802	41.2755	-0.721879	0.990575	-0.889522
ENSMUSG00000070730.11	96.1145	150.816	-0.721768	0.990562	-0.649968
ENSMUSG00000040327.16	377.641	253.866	0.832158	0.990533	0.572946
ENSMUSG00000020183.11	871.357	635.18	0.831533	0.990474	0.456098
ENSMUSG00000029152.13	643.124	469.424	0.83146	0.990467	0.454206
ENSMUSG00000052783.16	172.25	284.585	-0.720925	0.990458	-0.72436
ENSMUSG00000060126.14	1706.48	2517.35	-0.720699	0.990431	-0.56088
ENSMUSG00000026782.15	627.729	896.063	-0.719655	0.990295	-0.513457
ENSMUSG00000059423.13	33.7061	96.141	-0.718314	0.990119	-1.51214
ENSMUSG00000016559.14	646.328	873.059	-0.718032	0.99008	-0.433812
ENSMUSG00000058317.12	204.248	105.931	0.826987	0.990067	0.947196
ENSMUSG00000028277.13	312.263	160.286	0.826415	0.990019	0.962116
ENSMUSG00000003545.3	1300.29	1813.73	-0.716848	0.989917	-0.480123
ENSMUSG00000004880.11	484.288	287.689	0.823224	0.989765	0.751357
ENSMUSG00000057614.6	1601.51	1235.05	0.822947	0.989743	0.374864
ENSMUSG00000030172.15	159.391	265.824	-0.715618	0.989743	-0.737901
ENSMUSG00000034586.14	734.165	534.523	0.821053	0.989601	0.457853
ENSMUSG00000001773.14	416.877	290.725	0.820788	0.989581	0.519964
ENSMUSG00000026701.15	319.467	467.463	-0.714424	0.989571	-0.549185
ENSMUSG00000029657.15	526.905	713.644	-0.714377	0.989564	-0.437661
ENSMUSG00000008305.18	486.902	285.982	0.820215	0.989539	0.767709
ENSMUSG00000051674.15	192.861	320.511	-0.713734	0.989468	-0.732814
ENSMUSG00000014550.14	254.427	150.956	0.81889	0.989445	0.753123
ENSMUSG00000030513.14	541.423	359.753	0.818224	0.989398	0.58975
ENSMUSG00000031906.9	39.8629	78.2019	-0.713164	0.989383	-0.972156
ENSMUSG00000070047.14	2094.83	1743.31	0.815791	0.989232	0.265005
ENSMUSG00000000568.15	529.33	359.35	0.815548	0.989216	0.558777
ENSMUSG00000021546.18	1926.7	1615.28	0.815452	0.989209	0.254351
ENSMUSG00000037624.15	29.9474	76.2165	-0.711984	0.989204	-1.34767
ENSMUSG00000031299.10	218.851	335.999	-0.711584	0.989143	-0.618503
ENSMUSG00000020368.15	2249.2	2603.67	-0.711381	0.989111	-0.211133
ENSMUSG00000037851.13	820.177	550.047	0.813581	0.989085	0.576379
ENSMUSG00000062580.9	155.469	266.802	-0.711136	0.989074	-0.779145
ENSMUSG00000024187.15	392.709	249.818	0.813181	0.989059	0.652582
ENSMUSG00000018076.12	445.869	610.121	-0.710938	0.989043	-0.452477
ENSMUSG00000029761.16	325.266	194.272	0.812009	0.988982	0.743541
ENSMUSG00000029095.17	563.758	384.899	0.811965	0.98898	0.550596
ENSMUSG00000030556.13	245.392	130.454	0.811333	0.988939	0.911553
ENSMUSG00000020716.16	2534.62	2164.56	0.81109	0.988923	0.227701
ENSMUSG00000048379.9	254.745	149.895	0.811008	0.988918	0.765102
ENSMUSG00000028822.11	231.844	128.931	0.809776	0.988839	0.846554
ENSMUSG00000028820.13	2134.41	1738.25	0.809409	0.988816	0.296203
ENSMUSG00000031353.13	157.569	262.916	-0.709192	0.98877	-0.738617
ENSMUSG00000113893.1	70.4454	135.964	-0.709149	0.988764	-0.948648
ENSMUSG00000021266.16	87.8185	150.084	-0.709118	0.988759	-0.773173
ENSMUSG00000032020.15	252.353	144.913	0.808102	0.988733	0.800256
ENSMUSG00000078652.9	74.4227	120.557	-0.708661	0.988687	-0.695897
ENSMUSG00000030421.9	124.326	234.22	-0.708295	0.988629	-0.913739
ENSMUSG00000052296.7	528.434	360.153	0.806086	0.988606	0.553115
ENSMUSG00000041220.10	909.821	670.224	0.805351	0.98856	0.44094
ENSMUSG00000026349.14	747.419	531.784	0.803391	0.988437	0.491077
ENSMUSG00000005687.14	242.267	133.75	0.802342	0.988372	0.857066
ENSMUSG00000024002.18	727.441	516.441	0.801081	0.988294	0.494228
ENSMUSG00000041229.15	242.984	150.08	0.799497	0.988197	0.695125
ENSMUSG00000031529.5	1375.34	1126.13	0.799077	0.988171	0.288417
ENSMUSG00000044043.4	25.0613	55.2262	-0.705385	0.988162	-1.13989
ENSMUSG00000052656.12	340.558	208.915	0.798618	0.988143	0.704986
ENSMUSG00000005034.15	1778.01	1392.26	0.798301	0.988124	0.35283
ENSMUSG00000071669.14	323.438	205.399	0.798232	0.98812	0.655064
ENSMUSG00000027652.15	732.012	560.36	0.797245	0.98806	0.385515
ENSMUSG00000037104.9	200.408	295.333	-0.704674	0.988048	-0.559406
ENSMUSG00000005225.15	37.475	74.8481	-0.704292	0.987986	-0.998035
ENSMUSG00000039477.16	412.919	577.028	-0.70365	0.987883	-0.482783
ENSMUSG00000030101.15	58.6607	106.017	-0.703577	0.987871	-0.853833
ENSMUSG00000024286.8	224.943	347.118	-0.703519	0.987862	-0.625866
ENSMUSG00000071176.10	3362.82	2197.98	2.26493	0.987738	0.613489
ENSMUSG00000116034.1	62.0887	126.203	-0.702741	0.987736	-1.02334
ENSMUSG00000021180.9	539.967	370.85	0.791607	0.987729	0.542036
ENSMUSG00000032402.12	117.122	187.498	-0.70255	0.987706	-0.678861
ENSMUSG00000034343.14	156.192	84.8401	0.791133	0.987702	0.8805
ENSMUSG00000049092.11	89.7388	153.007	-0.701951	0.98761	-0.769793
ENSMUSG00000030465.19	1413.48	1696.6	-0.701903	0.987602	-0.263394
ENSMUSG00000006906.10	342.754	217.72	0.789088	0.987589	0.654701
ENSMUSG00000048758.14	241.842	355.727	-0.701815	0.987588	-0.556703
ENSMUSG00000039782.15	1797.77	1378.83	0.788984	0.987583	0.382767
ENSMUSG00000020717.19	10807.1	14421.5	-0.701778	0.987582	-0.416234
ENSMUSG00000066643.12	86.8253	144.827	-0.701482	0.987535	-0.738143
ENSMUSG00000040351.11	1763.94	2072.64	-0.701457	0.987531	-0.232668
ENSMUSG00000038860.15	97.3913	159.472	-0.701253	0.987498	-0.71144
ENSMUSG00000040759.9	540.218	369.338	0.78637	0.987444	0.548599
ENSMUSG00000035189.17	1106.23	829.357	0.786057	0.987428	0.415586
ENSMUSG00000006932.17	901.089	1140.68	-0.700786	0.987424	-0.340151
ENSMUSG00000038633.5	834.328	608.985	0.78485	0.987367	0.454208
ENSMUSG00000031386.14	708.259	515.034	0.783297	0.987291	0.459609
ENSMUSG00000030074.9	145.055	89.2826	0.783274	0.98729	0.700152
ENSMUSG00000049775.16	2515.21	1976.77	0.782671	0.987261	0.347532
ENSMUSG00000015709.9	1181.34	915.313	0.780517	0.987163	0.368084
ENSMUSG00000035967.15	545.988	354.133	0.780516	0.987163	0.62458
ENSMUSG00000025816.15	151.18	225.133	-0.699132	0.987162	-0.574509
ENSMUSG00000033499.14	494.9	368.835	0.700831	0.987156	0.424161
ENSMUSG00000054387.13	1138.1	938.063	0.701969	0.987153	0.27887
ENSMUSG00000042444.10	680.447	531.43	0.700324	0.987152	0.356602
ENSMUSG00000027298.17	1082.47	844.364	0.702512	0.987151	0.358396
ENSMUSG00000024197.10	294.518	183.902	0.699877	0.987149	0.679421
ENSMUSG00000078350.11	121.526	70.483	0.699685	0.987148	0.785921
ENSMUSG00000059923.13	361.88	256.146	0.703867	0.987139	0.498544
ENSMUSG00000041417.15	2469.45	2180.47	0.698304	0.987132	0.179555
ENSMUSG00000002455.14	238.645	132.956	0.698035	0.987127	0.843923
ENSMUSG00000027187.10	388.66	260.778	0.697992	0.987126	0.575687
ENSMUSG00000041236.8	522.736	362.134	0.705329	0.987118	0.529559
ENSMUSG00000040260.8	2934.43	2417.22	0.779474	0.987117	0.279731
ENSMUSG00000027624.20	585.722	795.541	-0.698784	0.987108	-0.44172
ENSMUSG00000025580.15	173.042	109.545	0.706101	0.987102	0.659599
ENSMUSG00000021238.11	484.51	333.403	0.706123	0.987102	0.539261
ENSMUSG00000038611.17	409.38	279.591	0.778979	0.987096	0.550121
ENSMUSG00000026240.12	69.1319	33.2377	0.706755	0.987089	1.05653
ENSMUSG00000032515.8	309.043	198.083	0.707332	0.987075	0.641701
ENSMUSG00000028522.16	509.442	367.372	0.707786	0.987063	0.471676
ENSMUSG00000066306.13	1339.92	1103.15	0.695383	0.98706	0.280515
ENSMUSG00000017286.15	297.093	182.936	0.695372	0.98706	0.699576
ENSMUSG00000035798.14	702.325	532.728	0.707926	0.987059	0.398741
ENSMUSG00000028096.13	166.844	96.3883	0.708457	0.987045	0.791566
ENSMUSG00000041073.10	611.307	421.052	0.708856	0.987034	0.537898
ENSMUSG00000025487.15	147.214	75.944	0.708957	0.987032	0.954909
ENSMUSG00000012296.16	237.654	157.968	0.694514	0.987031	0.589227
ENSMUSG00000042523.12	153.823	244.411	-0.698265	0.987026	-0.668041
ENSMUSG00000035969.15	614.542	424.124	0.777249	0.987025	0.535023
ENSMUSG00000038481.13	1735.9	1413.38	0.694112	0.987014	0.29653
ENSMUSG00000044098.14	286.567	185.784	0.710106	0.986996	0.625247
ENSMUSG00000038827.11	31.2503	72.9332	-0.698027	0.986989	-1.22271
ENSMUSG00000040356.16	175.644	106.041	0.710369	0.986987	0.728038
ENSMUSG00000009894.15	100.758	190.699	-0.697864	0.986964	-0.920395
ENSMUSG00000056515.9	1040.86	795.204	0.692865	0.98696	0.388383
ENSMUSG00000015850.11	348.736	220.235	0.692375	0.986934	0.663089
ENSMUSG00000045427.13	426.382	297.658	0.712275	0.986922	0.51849
ENSMUSG00000033943.15	958.644	766.238	0.692138	0.986921	0.323204
ENSMUSG00000032135.15	915.327	711.81	0.713274	0.986886	0.362795
ENSMUSG00000030956.15	804.508	639.457	0.69141	0.98688	0.331259
ENSMUSG00000033379.13	215.634	132.409	0.773052	0.986869	0.703589
ENSMUSG00000028542.17	1202.2	950.282	0.772911	0.986864	0.339243
ENSMUSG00000030245.10	123.29	75.3393	0.713888	0.986862	0.710584
ENSMUSG00000028552.13	2885.13	2413.53	0.714008	0.986858	0.257494
ENSMUSG00000039473.8	385.347	278.433	0.690773	0.986844	0.468831
ENSMUSG00000090125.3	143.346	89.6619	0.714418	0.986842	0.676934
ENSMUSG00000026648.18	223.753	132.091	0.714452	0.986841	0.760377
ENSMUSG00000025894.11	96.2052	50.2041	0.714609	0.986835	0.93831
ENSMUSG00000045767.9	670.447	505.246	0.714776	0.986829	0.408137
ENSMUSG00000021703.9	3381.98	2737.08	0.689919	0.986787	0.305232
ENSMUSG00000030275.6	1833.97	1515.93	0.770376	0.986782	0.27477
ENSMUSG00000004631.15	306.594	209.485	0.689812	0.986779	0.549481
ENSMUSG00000015882.18	995.361	774.986	0.716146	0.986776	0.361049
ENSMUSG00000062397.8	889.157	676.952	0.770085	0.986773	0.393384
ENSMUSG00000021038.17	165.434	92.8203	0.716782	0.986751	0.833741
ENSMUSG00000047976.4	1190.77	957.078	0.716787	0.986751	0.31518
ENSMUSG00000038280.12	194.43	109.487	0.717006	0.986742	0.828493
ENSMUSG00000031955.10	525.36	376.646	0.717568	0.98672	0.480097
ENSMUSG00000028291.7	267.687	171.007	0.688783	0.986709	0.646492
ENSMUSG00000028093.15	83.3157	35.5821	0.688733	0.986705	1.22744
ENSMUSG00000019731.13	157.133	87.144	0.688691	0.986702	0.850516
ENSMUSG00000027810.14	346.089	232.877	0.767609	0.986699	0.571576
ENSMUSG00000024104.11	961.739	789.182	0.688381	0.986678	0.285287
ENSMUSG00000052337.15	676.948	481.386	0.718744	0.986675	0.491851
ENSMUSG00000024507.6	358.768	208.386	0.718811	0.986673	0.783794
ENSMUSG00000038612.16	726.25	560.07	0.688254	0.986668	0.37486
ENSMUSG00000063296.5	175.156	95.0108	0.71906	0.986663	0.882475
ENSMUSG00000068040.10	182.393	293.208	-0.69574	0.986641	-0.684877
ENSMUSG00000043850.15	5.0942	20.9031	-0.69563	0.986625	-2.03679
ENSMUSG00000022568.17	535.848	391.545	0.764601	0.986619	0.452646
ENSMUSG00000039501.14	563.622	421.478	0.687609	0.986615	0.41927
ENSMUSG00000033540.18	146.219	81.1039	0.720572	0.986607	0.850293
ENSMUSG00000016534.15	1055.98	812.737	0.763889	0.986601	0.377716
ENSMUSG00000032328.12	1774.69	1401.81	0.763735	0.986597	0.340276
ENSMUSG00000047085.14	832.112	626.991	0.763702	0.986596	0.408334
ENSMUSG00000037824.6	382.489	239.122	0.763672	0.986596	0.677668
ENSMUSG00000043535.13	723.415	539.411	0.720975	0.986592	0.423439
ENSMUSG00000035181.6	542.505	406.077	0.720982	0.986591	0.417881
ENSMUSG00000041997.16	362.409	506.107	-0.695383	0.986588	-0.481823
ENSMUSG00000033253.18	401.174	289.119	0.763363	0.986588	0.472564
ENSMUSG00000018593.13	623.37	832.998	-0.695228	0.986566	-0.418226
ENSMUSG00000028677.19	954.885	713.755	0.721785	0.986562	0.419897
ENSMUSG00000036181.2	279.062	156.806	0.761989	0.986555	0.831606
ENSMUSG00000036112.15	492.937	351.477	0.722562	0.986536	0.487976
ENSMUSG00000021282.17	1343.08	1097.57	0.761063	0.986534	0.291231
ENSMUSG00000028967.10	492.857	336.946	0.760958	0.986532	0.548653
ENSMUSG00000024892.17	386.996	265.778	0.760681	0.986525	0.542096
ENSMUSG00000034912.18	835.623	632.405	0.722977	0.986522	0.402002
ENSMUSG00000023088.17	247.68	164.425	0.760454	0.98652	0.591046
ENSMUSG00000000915.15	631.151	469.443	0.759689	0.986504	0.427034
ENSMUSG00000030662.10	627.807	452.103	0.759461	0.986499	0.473671
ENSMUSG00000038712.16	271.953	175.568	0.759333	0.986496	0.631327
ENSMUSG00000030980.17	237.906	138.804	0.758948	0.986488	0.777343
ENSMUSG00000049421.13	276.6	166.134	0.758901	0.986487	0.735456
ENSMUSG00000024622.8	272.652	178.651	0.724132	0.986484	0.609917
ENSMUSG00000030533.16	309.028	199.74	0.758426	0.986477	0.629616
ENSMUSG00000108162.1	110.98	60.341	0.758111	0.986471	0.879082
ENSMUSG00000023827.8	616.421	427.874	0.758071	0.98647	0.526731
ENSMUSG00000005886.14	1210.03	969.099	0.724707	0.986466	0.320323
ENSMUSG00000030987.5	377.077	233.19	0.757704	0.986462	0.693353
ENSMUSG00000038178.16	541.388	394.701	0.685774	0.986455	0.455901
ENSMUSG00000031358.17	153.403	88.4693	0.725551	0.986439	0.79408
ENSMUSG00000032855.6	716.203	537.856	0.756469	0.986438	0.413148
ENSMUSG00000031657.16	395.583	271.158	0.755095	0.986412	0.544849
ENSMUSG00000030096.8	1070.21	834.396	0.754651	0.986404	0.359085
ENSMUSG00000044768.16	795.063	613.58	0.753365	0.986381	0.373817
ENSMUSG00000028691.12	883.598	636.316	0.728286	0.986368	0.473647
ENSMUSG00000031950.7	468.769	316.16	0.750919	0.986341	0.568222
ENSMUSG00000033918.16	162.54	108.69	0.684547	0.986339	0.58058
ENSMUSG00000030201.15	951.444	775.787	0.684393	0.986324	0.29446
ENSMUSG00000042507.15	336.588	214.225	0.730352	0.986324	0.651862
ENSMUSG00000024483.19	899.99	677.971	0.748132	0.986302	0.408686
ENSMUSG00000026131.20	16231.6	14966.4	0.73251	0.986288	0.117086
ENSMUSG00000039218.17	5352.78	4717.2	0.732803	0.986284	0.182357
ENSMUSG00000031696.9	945.271	749.634	0.7459	0.986276	0.334542
ENSMUSG00000059921.15	961.918	764.465	0.745649	0.986274	0.331464
ENSMUSG00000002017.10	305.519	184.312	0.733802	0.98627	0.72911
ENSMUSG00000043940.15	2284.58	2007.34	0.745241	0.98627	0.186645
ENSMUSG00000024163.17	1239.42	1025.96	0.733812	0.98627	0.272682
ENSMUSG00000022108.8	2724.02	2186.74	0.745194	0.98627	0.316954
ENSMUSG00000024787.14	170.695	93.1651	0.744298	0.986262	0.873562
ENSMUSG00000028452.7	935.947	1203.66	-0.693108	0.986258	-0.362925
ENSMUSG00000025192.13	105.901	61.8468	0.735173	0.986258	0.775951
ENSMUSG00000007739.10	409.466	287.342	0.743185	0.986254	0.510974
ENSMUSG00000022905.12	400.229	283.551	0.743169	0.986254	0.497214
ENSMUSG00000033326.15	521.661	351.286	0.742916	0.986252	0.570465
ENSMUSG00000005483.10	313.431	187.202	0.73582	0.986252	0.743553
ENSMUSG00000027303.18	1185.14	953.994	0.742316	0.986249	0.31301
ENSMUSG00000053398.11	524.642	384.797	0.737229	0.986245	0.447235
ENSMUSG00000052713.9	556.769	373.462	0.73749	0.986244	0.576116
ENSMUSG00000037706.17	3259.07	2794.54	0.740905	0.986243	0.221849
ENSMUSG00000029098.17	267.78	138.978	0.737669	0.986243	0.946189
ENSMUSG00000053815.5	8.93092	4.39667	0.737783	0.986243	1.0224
ENSMUSG00000071796.13	1900.57	1571.4	0.738042	0.986242	0.27438
ENSMUSG00000043411.15	744.982	517.829	0.73827	0.986242	0.524731
ENSMUSG00000026739.13	456.878	315.19	0.73881	0.986241	0.535585
ENSMUSG00000038740.9	655.189	476.58	0.739051	0.986241	0.459193
ENSMUSG00000056966.7	2524.58	2104.48	0.739366	0.986241	0.262579
ENSMUSG00000039621.13	1025.18	814.66	0.739377	0.986241	0.331613
ENSMUSG00000030747.5	190.729	101.799	0.739927	0.986241	0.905797
ENSMUSG00000032702.16	303.227	439.299	-0.69298	0.98624	-0.534804
ENSMUSG00000072049.6	5.43546	2.30526	0.682838	0.986159	1.23747
ENSMUSG00000064373.12	2506.03	2085.78	0.682479	0.986121	0.264814
ENSMUSG00000026023.16	356.133	231.729	0.681701	0.986031	0.619977
ENSMUSG00000024073.16	2647.64	2416.44	0.681465	0.986003	0.131825
ENSMUSG00000030083.11	119.794	61.7013	0.680726	0.985917	0.957185
ENSMUSG00000022742.6	806.858	611.976	0.680512	0.985892	0.39884
ENSMUSG00000042055.13	324.438	218.258	0.679745	0.985797	0.571908
ENSMUSG00000029580.14	9257.99	8184.68	0.679505	0.985766	0.177773
ENSMUSG00000020864.13	736.894	1073.09	-0.689037	0.98571	-0.542237
ENSMUSG00000036698.11	454.463	321.502	0.679052	0.985709	0.499337
ENSMUSG00000018415.14	226.749	383.408	-0.689027	0.985709	-0.75778
ENSMUSG00000026442.14	10419.8	8994.11	0.678239	0.985607	0.212281
ENSMUSG00000040044.11	291.112	177.782	0.678235	0.985606	0.711464
ENSMUSG00000003970.9	294.811	465.156	-0.687868	0.985563	-0.657924
ENSMUSG00000052572.19	785.802	1012.02	-0.687865	0.985563	-0.365001
ENSMUSG00000037234.17	2075.25	1734.95	0.677625	0.985524	0.258387
ENSMUSG00000021972.14	312.986	426.596	-0.687036	0.985464	-0.44677
ENSMUSG00000032633.12	354.95	254.142	0.67677	0.985408	0.481979
ENSMUSG00000006301.17	1273.15	950.775	0.67644	0.985364	0.42123
ENSMUSG00000032782.19	18.6988	37.6525	-0.685738	0.985313	-1.0098
ENSMUSG00000048490.14	365.053	495.603	-0.683284	0.98505	-0.441081
ENSMUSG00000037416.13	1030.87	1212.08	-0.683043	0.985025	-0.233621
ENSMUSG00000048279.19	252.931	351.792	-0.682577	0.984979	-0.475977
ENSMUSG00000045503.16	144.195	87.4665	0.673449	0.984938	0.721216
ENSMUSG00000044042.19	203.386	295.02	-0.681251	0.98485	-0.53659
ENSMUSG00000085793.2	24.2968	52.1569	-0.681141	0.98484	-1.10209
ENSMUSG00000024462.17	1261.09	1500.12	-0.680235	0.984759	-0.250411
ENSMUSG00000062127.11	572.223	418.602	0.671518	0.984651	0.450999
ENSMUSG00000020170.4	398.006	545.257	-0.678546	0.984615	-0.454145
ENSMUSG00000000948.16	133.507	221.351	-0.678024	0.984572	-0.729422
ENSMUSG00000026987.16	1847.25	1516.77	0.670626	0.984516	0.284378
ENSMUSG00000033174.17	157.362	245.37	-0.677306	0.984515	-0.640878
ENSMUSG00000032249.14	284.967	424.392	-0.676661	0.984467	-0.574604
ENSMUSG00000061983.7	369.196	552.663	-0.676429	0.98445	-0.582012
ENSMUSG00000026626.11	1271.35	1493.01	-0.676204	0.984433	-0.231867
ENSMUSG00000025899.14	167.109	238.929	-0.675156	0.984358	-0.515789
ENSMUSG00000058006.12	811.48	609.823	0.669335	0.984319	0.412166
ENSMUSG00000070576.4	30.0812	62.0958	-0.673819	0.98427	-1.04563
ENSMUSG00000001280.13	616.669	450.372	0.668932	0.984257	0.453377
ENSMUSG00000090862.3	206.051	324.853	-0.673462	0.984246	-0.656784
ENSMUSG00000021709.14	7595.74	6778.68	0.668817	0.984239	0.164187
ENSMUSG00000027525.18	490.848	633.603	-0.673295	0.984235	-0.368302
ENSMUSG00000022822.16	1091.27	843.111	0.668624	0.98421	0.372211
ENSMUSG00000026496.11	154.996	233.227	-0.672594	0.984193	-0.589499
ENSMUSG00000002617.14	153.205	89.8311	0.668491	0.984189	0.770175
ENSMUSG00000059623.6	10.6833	18.5447	-0.672402	0.984181	-0.795649
ENSMUSG00000063229.15	173.333	258.634	-0.672095	0.984163	-0.577364
ENSMUSG00000022514.14	1404.97	1106.92	0.668293	0.984159	0.343979
ENSMUSG00000020658.10	312.281	443.071	-0.671927	0.984153	-0.504694
ENSMUSG00000025757.13	511.644	678.659	-0.671305	0.984115	-0.407546
ENSMUSG00000019179.10	203.839	303.692	-0.670889	0.984092	-0.575179
ENSMUSG00000044550.11	39.6817	79.6009	-0.670868	0.984091	-1.00431
ENSMUSG00000035011.15	283.338	201.578	0.667754	0.984076	0.491187
ENSMUSG00000048280.18	297	403.379	-0.670218	0.984056	-0.44167
ENSMUSG00000044285.8	463.174	636.278	-0.670098	0.984049	-0.458103
ENSMUSG00000025758.10	24.9101	47.9337	-0.670053	0.984047	-0.944307
ENSMUSG00000003731.13	338.191	238.262	0.66716	0.983984	0.505287
ENSMUSG00000089872.10	196.239	285.107	-0.668554	0.983968	-0.53889
ENSMUSG00000030779.16	563.295	736.241	-0.668179	0.983949	-0.386287
ENSMUSG00000052298.12	841.031	647.691	0.666909	0.983945	0.376852
ENSMUSG00000076431.4	110.403	182.463	-0.667875	0.983934	-0.724827
ENSMUSG00000041268.17	651.539	813.909	-0.667794	0.983929	-0.321018
ENSMUSG00000033590.8	9.48491	19.334	-0.667666	0.983923	-1.02743
ENSMUSG00000043733.14	1331.8	1715.58	-0.666678	0.983875	-0.365324
ENSMUSG00000022637.11	305.934	175.769	0.666337	0.983856	0.799538
ENSMUSG00000028868.13	481.228	356.144	0.666214	0.983837	0.434263
ENSMUSG00000022956.11	159.201	246.761	-0.665521	0.98382	-0.632259
ENSMUSG00000087370.3	365.802	505.429	-0.665182	0.983804	-0.466447
ENSMUSG00000007850.16	1448.04	1721.86	-0.664589	0.983777	-0.24987
ENSMUSG00000029505.17	789.377	965.736	-0.66383	0.983742	-0.290915
ENSMUSG00000004768.14	38.9979	88.6665	-0.663248	0.983716	-1.18499
ENSMUSG00000035171.9	35.3205	70.8206	-0.663172	0.983712	-1.00366
ENSMUSG00000022772.12	99.0243	167.628	-0.662995	0.983704	-0.759408
ENSMUSG00000061451.13	1636.75	1346.45	0.665081	0.983662	0.281674
ENSMUSG00000000439.9	196.36	111.653	0.664938	0.98364	0.81448
ENSMUSG00000030432.12	248.206	393.252	-0.660392	0.983587	-0.663913
ENSMUSG00000021756.12	915.852	738.534	0.664477	0.983569	0.310449
ENSMUSG00000009741.15	365.576	252.592	0.664334	0.983547	0.533361
ENSMUSG00000056537.11	946.548	730.043	0.664101	0.983512	0.374694
ENSMUSG00000032288.9	67.4668	39.4294	0.663952	0.983489	0.774905
ENSMUSG00000032253.13	1119.02	1352.06	-0.657438	0.983451	-0.272926
ENSMUSG00000034220.7	121.655	191.218	-0.655023	0.983333	-0.652419
ENSMUSG00000040596.15	1055.05	1425.06	-0.654244	0.983293	-0.433717
ENSMUSG00000027984.8	244.724	156.944	0.662121	0.98321	0.64091
ENSMUSG00000029156.11	235.33	147.364	0.661557	0.983125	0.675302
ENSMUSG00000052593.16	224.517	345.157	-0.650251	0.983072	-0.620427
ENSMUSG00000035202.8	28819.1	32596	-0.650117	0.983064	-0.17767
ENSMUSG00000063445.14	236.074	150.091	0.660947	0.983034	0.653403
ENSMUSG00000017639.13	465.158	643.761	-0.64962	0.983034	-0.468804
ENSMUSG00000029422.15	745.688	568.646	0.660772	0.983008	0.39104
ENSMUSG00000017288.15	166.768	257.274	-0.648184	0.982945	-0.625466
ENSMUSG00000000605.9	626.44	446.006	0.660246	0.98293	0.490112
ENSMUSG00000027506.15	618.043	488.351	0.660233	0.982928	0.339789
ENSMUSG00000024782.7	676.162	532.632	0.660165	0.982918	0.344232
ENSMUSG00000039997.16	35.348	72.1873	-0.647619	0.982908	-1.03012
ENSMUSG00000029050.15	591.586	769.537	-0.647278	0.982885	-0.379402
ENSMUSG00000024120.12	345.96	234.121	0.659412	0.982807	0.563353
ENSMUSG00000041225.16	256.761	346.049	-0.646036	0.982802	-0.430548
ENSMUSG00000071072.12	490.623	642.712	-0.644749	0.982712	-0.389557
ENSMUSG00000024212.9	136.427	67.586	0.658356	0.982655	1.01333
ENSMUSG00000094531.3	7.63874	18.6684	-0.643458	0.982617	-1.28919
ENSMUSG00000023019.12	307.573	213.24	0.658043	0.98261	0.528451
ENSMUSG00000041351.16	161.684	241.505	-0.641563	0.982472	-0.578872
ENSMUSG00000053646.13	522.94	664.658	-0.640677	0.982402	-0.345969
ENSMUSG00000075595.9	795.429	1000	-0.639894	0.982339	-0.330197
ENSMUSG00000057530.14	131.668	199.911	-0.639705	0.982323	-0.602454
ENSMUSG00000022791.19	207.594	300.672	-0.639573	0.982312	-0.534425
ENSMUSG00000050199.13	95.1392	161.192	-0.639521	0.982308	-0.76067
ENSMUSG00000036225.15	29.7151	59.8091	-0.638821	0.98225	-1.00917
ENSMUSG00000020260.9	52.8386	91.8647	-0.638648	0.982236	-0.797917
ENSMUSG00000024978.11	379.752	526.143	-0.637596	0.982146	-0.470396
ENSMUSG00000007989.7	307.161	492.163	-0.637477	0.982136	-0.680143
ENSMUSG00000050148.9	664.956	828.165	-0.63746	0.982134	-0.31666
ENSMUSG00000040462.13	472.625	317.339	0.654287	0.982096	0.574671
ENSMUSG00000079056.12	35.1137	78.9905	-0.636877	0.982084	-1.16965
ENSMUSG00000032648.14	63.465	97.1141	-0.636693	0.982068	-0.61372
ENSMUSG00000020076.7	339.61	236.48	0.654006	0.982059	0.52216
ENSMUSG00000030759.16	768.039	586.052	0.653819	0.982034	0.390149
ENSMUSG00000025907.14	796.296	609.969	0.653669	0.982014	0.38457
ENSMUSG00000040760.11	578.24	410.388	0.653526	0.981996	0.49468
ENSMUSG00000037692.14	182.09	110.811	0.653385	0.981978	0.716549
ENSMUSG00000024048.15	72.2808	130.915	-0.635209	0.981937	-0.856941
ENSMUSG00000024993.15	261.592	178.769	0.652673	0.981889	0.549224
ENSMUSG00000054693.14	941.347	735.376	0.652449	0.981861	0.356245
ENSMUSG00000023973.13	160.169	99.8171	0.652441	0.98186	0.682233
ENSMUSG00000029089.8	53.1913	93.8112	-0.633334	0.981768	-0.818571
ENSMUSG00000027479.14	456.561	608.644	-0.633184	0.981754	-0.414792
ENSMUSG00000045078.12	449.934	303.954	0.651292	0.981718	0.565858
ENSMUSG00000004317.14	305.286	217.038	0.650775	0.981658	0.492214
ENSMUSG00000020741.17	139.606	203.741	-0.631527	0.981601	-0.545378
ENSMUSG00000094936.8	221.599	311.021	-0.630413	0.981498	-0.489058
ENSMUSG00000041560.12	292.15	438.903	-0.630327	0.98149	-0.587193
ENSMUSG00000050530.14	320.754	223.255	0.649273	0.981484	0.522779
ENSMUSG00000051331.16	95.9902	185.225	-0.630025	0.981462	-0.948316
ENSMUSG00000048100.13	156.999	297.926	-0.62919	0.981383	-0.924197
ENSMUSG00000042520.16	713.073	564.106	0.648172	0.981364	0.338085
ENSMUSG00000008682.13	897.361	1135.24	-0.627806	0.981253	-0.339236
ENSMUSG00000078485.3	338.141	225.797	0.646281	0.981168	0.582596
ENSMUSG00000020015.10	395.651	515.754	-0.626854	0.981163	-0.382458
ENSMUSG00000021578.17	252.58	170.82	0.645786	0.981118	0.564266
ENSMUSG00000020248.18	79.2432	122.735	-0.626311	0.981112	-0.631185
ENSMUSG00000022999.15	24.7207	40.1732	-0.625999	0.981082	-0.700514
ENSMUSG00000037236.16	1640.04	1403.29	0.645252	0.981065	0.224926
ENSMUSG00000021314.13	271.561	380.464	-0.625738	0.981058	-0.486487
ENSMUSG00000039470.15	86.4031	150.338	-0.624063	0.9809	-0.799052
ENSMUSG00000021371.5	130.322	198.363	-0.623968	0.980891	-0.606068
ENSMUSG00000032745.18	506.615	360.215	0.642502	0.980819	0.492032
ENSMUSG00000037098.18	309.921	402.405	-0.623186	0.980818	-0.37675
ENSMUSG00000030697.7	129.731	78.8017	0.642041	0.980781	0.719225
ENSMUSG00000041459.15	579.999	402.123	0.641892	0.980768	0.528414
ENSMUSG00000041341.10	773.61	608.566	0.641723	0.980754	0.346193
ENSMUSG00000038095.15	949.159	1145.53	-0.62194	0.980702	-0.271288
ENSMUSG00000036395.15	37.9816	76.8185	-0.621672	0.980677	-1.01615
ENSMUSG00000051223.14	824.605	629.874	0.640728	0.980675	0.38864
ENSMUSG00000056050.13	673.493	528.602	0.640249	0.980638	0.349481
ENSMUSG00000054517.9	16.3928	42.23	-0.621218	0.980635	-1.36521
ENSMUSG00000024853.10	623.514	472.461	0.639691	0.980596	0.400226
ENSMUSG00000022744.12	616.13	453.078	0.639177	0.980558	0.443476
ENSMUSG00000035093.16	5131.65	4484.29	0.638498	0.980511	0.194545
ENSMUSG00000058690.14	789.258	965.986	-0.61924	0.980453	-0.291506
ENSMUSG00000022858.16	998.423	825.008	0.636977	0.980408	0.275244
ENSMUSG00000055013.16	2245.16	1924.44	0.636877	0.980402	0.22238
ENSMUSG00000113949.1	33.8991	61.5096	-0.618421	0.980378	-0.859564
ENSMUSG00000028309.14	1009.76	799.018	0.636256	0.980363	0.337711
ENSMUSG00000017478.15	320.175	222.97	0.63506	0.98029	0.522011
ENSMUSG00000041720.14	720.135	867.259	-0.616715	0.980224	-0.268195
ENSMUSG00000027341.10	120.636	68.0093	0.633873	0.980224	0.82685
ENSMUSG00000014846.12	379.576	272.755	0.633853	0.980223	0.47678
ENSMUSG00000024576.14	1645.78	1387.32	0.633733	0.980216	0.246464
ENSMUSG00000046897.17	363.212	266.589	0.633677	0.980213	0.446195
ENSMUSG00000019790.17	232.063	324.247	-0.615397	0.980107	-0.482577
ENSMUSG00000033228.8	1128.79	897.4	0.631362	0.980092	0.33096
ENSMUSG00000015127.14	149.046	81.4647	0.631196	0.980084	0.871512
ENSMUSG00000096822.2	469.623	651.369	-0.614797	0.980053	-0.471973
ENSMUSG00000026036.17	83.3245	51.9595	0.62977	0.980016	0.681353
ENSMUSG00000033417.16	196.851	286.154	-0.614299	0.980009	-0.539689
ENSMUSG00000026836.15	170.176	97.7873	0.629379	0.979997	0.79931
ENSMUSG00000027533.10	602.435	432.991	0.629113	0.979985	0.476468
ENSMUSG00000029147.11	115.897	175.412	-0.613715	0.979958	-0.597908
ENSMUSG00000038264.8	249.723	163.944	0.627417	0.97991	0.607123
ENSMUSG00000019505.7	2929.38	2515.09	0.626964	0.97989	0.219985
ENSMUSG00000024294.14	830.385	1038.19	-0.612476	0.979849	-0.32222
ENSMUSG00000040289.8	28.9343	54.5394	-0.612437	0.979846	-0.914517
ENSMUSG00000039578.17	73.719	36.0453	0.625503	0.979828	1.03223
ENSMUSG00000012848.15	228.832	322.337	-0.612225	0.979827	-0.494283
ENSMUSG00000002981.10	500.329	382.111	0.625385	0.979823	0.388886
ENSMUSG00000029439.14	583.861	438.196	0.625221	0.979816	0.41405
ENSMUSG00000050912.15	515.512	358.09	0.625209	0.979816	0.525684
ENSMUSG00000043448.13	480.849	343.878	0.624776	0.979797	0.483688
ENSMUSG00000024429.9	82.3119	138.714	-0.611788	0.979789	-0.752937
ENSMUSG00000062627.9	396.264	516.749	-0.611651	0.979777	-0.383002
ENSMUSG00000020532.18	1708.62	1458.97	0.624089	0.979769	0.227877
ENSMUSG00000022770.17	2179.62	1855.91	0.624033	0.979766	0.231951
ENSMUSG00000024260.14	271.452	370.989	-0.611525	0.979766	-0.450678
ENSMUSG00000022887.9	23.1555	45.4853	-0.611452	0.97976	-0.974044
ENSMUSG00000020349.4	1400.99	1203.3	0.623443	0.979742	0.219444
ENSMUSG00000061436.15	4201.16	5163.53	-0.611047	0.979725	-0.297571
ENSMUSG00000031434.15	73.3535	41	0.622301	0.979695	0.839243
ENSMUSG00000027132.3	31.8329	71.5643	-0.610682	0.979693	-1.16872
ENSMUSG00000022159.16	174.297	123.422	0.622006	0.979682	0.497948
ENSMUSG00000003518.13	825.855	1090.71	-0.61041	0.97967	-0.401312
ENSMUSG00000032094.8	6.61342	11.343	-0.610392	0.979668	-0.778338
ENSMUSG00000071659.4	888.159	685.167	0.62161	0.979666	0.374363
ENSMUSG00000019889.10	686.93	520.823	0.621466	0.97966	0.399368
ENSMUSG00000022321.15	572.965	414.51	0.620997	0.97964	0.467039
ENSMUSG00000020409.10	336.667	454.405	-0.610059	0.979639	-0.432657
ENSMUSG00000025858.12	179.004	121.987	0.620761	0.97963	0.553265
ENSMUSG00000015149.14	1970.72	1692.89	0.620404	0.979615	0.219236
ENSMUSG00000018796.13	585.76	474.021	0.62021	0.979606	0.305357
ENSMUSG00000041498.13	5.25554	2.60395	0.620153	0.979604	1.01314
ENSMUSG00000036499.9	591.577	464.219	0.618807	0.979546	0.349759
ENSMUSG00000063531.7	30.154	65.8439	-0.608974	0.979545	-1.1267
ENSMUSG00000032733.6	516.613	404.207	0.618739	0.979543	0.353991
ENSMUSG00000010376.15	58.6506	93.1484	-0.608713	0.979523	-0.667385
ENSMUSG00000020640.10	1246.71	991.566	0.618257	0.979521	0.33034
ENSMUSG00000034648.9	1579.39	1284.67	0.617494	0.979486	0.297974
ENSMUSG00000021339.4	382.418	289.071	0.617338	0.979479	0.403725
ENSMUSG00000027708.14	275.752	201.428	0.616201	0.979426	0.453108
ENSMUSG00000060510.14	536.735	427.401	0.615733	0.979403	0.32862
ENSMUSG00000021477.9	340.976	466.824	-0.606442	0.979326	-0.453208
ENSMUSG00000041642.18	1203.51	1006.58	0.614129	0.979324	0.257784
ENSMUSG00000021595.18	253.795	168.559	0.613815	0.979307	0.590413
ENSMUSG00000025410.10	629.855	474.21	0.61371	0.979301	0.409494
ENSMUSG00000059981.12	383.398	486.286	-0.605708	0.979262	-0.342965
ENSMUSG00000033712.6	224.757	145.997	0.612679	0.979246	0.622427
ENSMUSG00000030269.14	75.3338	43.3055	0.612601	0.979242	0.798746
ENSMUSG00000028405.9	218.828	142.729	0.612076	0.979213	0.616516
ENSMUSG00000066036.14	1947.88	2253.4	-0.604663	0.979171	-0.2102
ENSMUSG00000039741.15	285.25	191.131	0.611248	0.979165	0.577669
ENSMUSG00000068882.13	214.681	323.796	-0.604549	0.979161	-0.592894
ENSMUSG00000027447.6	1624.99	2003.51	-0.604497	0.979156	-0.302101
ENSMUSG00000024426.17	410.516	298.176	0.610729	0.979135	0.461275
ENSMUSG00000052512.17	928.942	1103.17	-0.604149	0.979126	-0.247998
ENSMUSG00000033209.17	105.28	176.338	-0.603822	0.979097	-0.744107
ENSMUSG00000028700.14	72.4541	120.062	-0.603629	0.97908	-0.728637
ENSMUSG00000070822.5	34.8222	73.4008	-0.603365	0.979057	-1.07579
ENSMUSG00000026615.14	770.725	628.421	0.608876	0.97902	0.294485
ENSMUSG00000063800.5	33.4036	58.8058	-0.602436	0.978974	-0.815956
ENSMUSG00000029581.14	1497.81	1285.18	0.607316	0.978915	0.220878
ENSMUSG00000027610.17	198.821	128.5	0.606965	0.978891	0.629709
ENSMUSG00000021975.9	142.946	83.0345	0.606664	0.97887	0.783683
ENSMUSG00000047388.10	121.208	185.57	-0.601121	0.978856	-0.614478
ENSMUSG00000074457.10	370.711	266.249	0.605741	0.978803	0.477522
ENSMUSG00000038538.17	1139.77	1360.02	-0.5998	0.978734	-0.254887
ENSMUSG00000011884.13	761.529	629.833	0.604716	0.978726	0.27393
ENSMUSG00000026219.14	1406.7	1621.88	-0.599331	0.978691	-0.205355
ENSMUSG00000060261.15	981.521	1147.34	-0.598845	0.978646	-0.225205
ENSMUSG00000000276.11	144.715	209.703	-0.598542	0.978617	-0.535136
ENSMUSG00000035478.14	153.837	221.626	-0.598357	0.978599	-0.526723
ENSMUSG00000004633.17	1139.84	918.653	0.602689	0.978563	0.311239
ENSMUSG00000021843.17	1856.6	1572.05	0.601802	0.978489	0.240014
ENSMUSG00000018199.9	475.273	607.724	-0.597146	0.978484	-0.354661
ENSMUSG00000052331.14	434.608	311.328	0.601484	0.978461	0.481278
ENSMUSG00000027519.10	291.806	190.916	0.601392	0.978453	0.612072
ENSMUSG00000020744.13	85.2238	45.6786	0.600836	0.978403	0.899737
ENSMUSG00000033105.12	306.846	224.064	0.599845	0.978315	0.453603
ENSMUSG00000032741.9	172.155	263.855	-0.595365	0.978307	-0.616032
ENSMUSG00000015755.16	1038.27	881.658	0.599193	0.978252	0.235888
ENSMUSG00000058444.8	199.687	116.257	0.599026	0.978236	0.780425
ENSMUSG00000024598.9	222.723	128.636	0.59888	0.978222	0.791953
ENSMUSG00000000738.18	102.548	164.233	-0.594511	0.97822	-0.679449
ENSMUSG00000075376.10	1074.83	892.395	0.598743	0.978209	0.268359
ENSMUSG00000046240.8	1370.5	1161.37	0.598007	0.978139	0.238871
ENSMUSG00000059708.12	65.7663	113.367	-0.593597	0.978124	-0.785582
ENSMUSG00000082277.2	9.67733	21.6603	-0.592941	0.978056	-1.16237
ENSMUSG00000038486.9	1031.51	827.555	0.597117	0.978049	0.31783
ENSMUSG00000046201.9	502.639	377.368	0.596894	0.978026	0.413548
ENSMUSG00000021577.14	505.586	642.78	-0.592522	0.97801	-0.346369
ENSMUSG00000030802.14	131.517	81.3838	0.59633	0.977968	0.692441
ENSMUSG00000036712.15	809.235	636.67	0.595621	0.977894	0.346013
ENSMUSG00000028223.8	32.5802	62.5768	-0.590541	0.977791	-0.941634
ENSMUSG00000036561.9	370.425	491.775	-0.590518	0.977788	-0.408817
ENSMUSG00000026554.15	578.937	461.767	0.59461	0.977784	0.326243
ENSMUSG00000018425.18	270.851	188.525	0.593971	0.977715	0.522744
ENSMUSG00000032115.14	252.544	346.975	-0.589883	0.977715	-0.458298
ENSMUSG00000042350.13	400.748	279.546	0.593914	0.977709	0.519606
ENSMUSG00000038121.6	187.289	112.014	0.593634	0.977677	0.741582
ENSMUSG00000022400.9	236.58	164.758	0.593539	0.977666	0.521977
ENSMUSG00000054920.12	321.199	453.783	-0.589445	0.977664	-0.498536
ENSMUSG00000030822.15	103.06	162.622	-0.589063	0.977619	-0.65804
ENSMUSG00000008690.15	141.703	83.0621	0.592997	0.977604	0.770612
ENSMUSG00000040026.8	845.802	1054.75	-0.588651	0.977571	-0.31851
ENSMUSG00000038406.17	244.213	334.198	-0.588631	0.977568	-0.452562
ENSMUSG00000028020.16	1034.52	797.714	0.592612	0.977559	0.375014
ENSMUSG00000056342.16	1526.16	1706.91	-0.588135	0.977507	-0.161476
ENSMUSG00000031990.15	791.785	608.34	0.591847	0.977471	0.380231
ENSMUSG00000021377.15	308.324	399.71	-0.587248	0.977399	-0.374506
ENSMUSG00000026932.14	951.294	1270.44	-0.587068	0.977377	-0.417367
ENSMUSG00000055538.7	920.682	1255.22	-0.587039	0.977373	-0.447161
ENSMUSG00000116165.1	7.44712	19.7364	-0.586709	0.977333	-1.40611
ENSMUSG00000053565.10	174.005	114.724	0.590511	0.97731	0.600964
ENSMUSG00000023830.14	207.703	310.651	-0.586171	0.977262	-0.58077
ENSMUSG00000047215.14	257.673	395.98	-0.585894	0.977226	-0.619888
ENSMUSG00000016541.10	305.41	395.401	-0.585528	0.977179	-0.37257
ENSMUSG00000025982.13	1601.97	1389.37	0.58922	0.977151	0.205416
ENSMUSG00000019854.17	176.614	291.131	-0.584994	0.977109	-0.721069
ENSMUSG00000055436.18	1039.5	864.804	0.588831	0.977101	0.265447
ENSMUSG00000029840.8	295.282	428.48	-0.584829	0.977088	-0.537136
ENSMUSG00000028341.9	32.5015	88.4842	-0.584771	0.97708	-1.44491
ENSMUSG00000025736.15	20.1827	43.1405	-0.584668	0.977067	-1.09593
ENSMUSG00000078490.10	41.865	72.9398	-0.583445	0.976898	-0.800962
ENSMUSG00000014313.15	334.173	491.551	-0.58338	0.976889	-0.556749
ENSMUSG00000038437.11	422.657	550.349	-0.583112	0.976852	-0.380859
ENSMUSG00000039221.10	69.3356	110.409	-0.582899	0.976823	-0.671184
ENSMUSG00000072704.6	305.978	421.152	-0.582482	0.976764	-0.460915
ENSMUSG00000021395.11	190.325	274.015	-0.582267	0.976733	-0.52579
ENSMUSG00000027184.14	1053.69	1296	-0.582145	0.976715	-0.298616
ENSMUSG00000036167.16	216.118	303.727	-0.581994	0.976693	-0.490956
ENSMUSG00000071655.12	176.239	295.51	-0.581991	0.976692	-0.745673
ENSMUSG00000052681.8	565.564	403.657	0.585676	0.976691	0.48656
ENSMUSG00000038116.16	461.787	352.961	0.585602	0.976681	0.387718
ENSMUSG00000112149.1	255.525	359.719	-0.581867	0.976674	-0.493404
ENSMUSG00000044501.17	104.834	66.6451	0.584827	0.976575	0.653531
ENSMUSG00000062169.13	126.305	191.082	-0.579923	0.976385	-0.597282
ENSMUSG00000031703.8	884.182	703.702	0.582395	0.976238	0.329379
ENSMUSG00000027434.11	169.8	112.093	0.581911	0.976169	0.599142
ENSMUSG00000040128.9	810.394	969.395	-0.578484	0.976162	-0.258461
ENSMUSG00000043962.16	547.626	672.992	-0.578449	0.976156	-0.297398
ENSMUSG00000006576.16	75.7398	138.405	-0.577608	0.976019	-0.869772
ENSMUSG00000034484.8	214.617	153.493	0.580463	0.975962	0.483586
ENSMUSG00000052310.9	43.7901	78.2919	-0.57682	0.975891	-0.838259
ENSMUSG00000038042.11	823.405	679.35	0.579258	0.975787	0.277448
ENSMUSG00000022453.8	83.9788	44.9333	0.579164	0.975773	0.90224
ENSMUSG00000020255.8	6756.93	7762.4	-0.575958	0.975746	-0.200135
ENSMUSG00000045671.17	75.3088	120.899	-0.575947	0.975744	-0.682917
ENSMUSG00000027365.14	854.5	682.202	0.578765	0.975715	0.324882
ENSMUSG00000034064.14	138.744	203.495	-0.575351	0.975641	-0.552573
ENSMUSG00000032570.17	1119.63	973.236	0.578206	0.975632	0.202163
ENSMUSG00000033917.15	655.64	527.545	0.577989	0.9756	0.313609
ENSMUSG00000031485.15	500.469	389.849	0.577801	0.975573	0.360363
ENSMUSG00000027835.11	183.679	107.289	0.577412	0.975515	0.775682
ENSMUSG00000029326.13	279.574	181.157	0.577239	0.97549	0.625987
ENSMUSG00000039428.11	306.233	224.395	0.577216	0.975487	0.448594
ENSMUSG00000027201.16	510.905	408.984	0.576753	0.975417	0.321013
ENSMUSG00000028932.8	469.672	335.217	0.576562	0.975389	0.486561
ENSMUSG00000026484.13	78.4468	154.643	-0.573829	0.975374	-0.979151
ENSMUSG00000003974.6	1215.61	1033.75	0.576082	0.975317	0.233788
ENSMUSG00000024581.13	212.929	290.658	-0.573457	0.975306	-0.448949
ENSMUSG00000025050.8	26.3147	53.9081	-0.573265	0.975271	-1.03463
ENSMUSG00000002957.11	268.054	384.482	-0.573237	0.975266	-0.520392
ENSMUSG00000057367.12	230.57	147.328	0.575269	0.975195	0.646174
ENSMUSG00000023723.17	18.7366	39.329	-0.572712	0.975171	-1.06973
ENSMUSG00000027200.17	2188.86	1833.95	0.574667	0.975105	0.255228
ENSMUSG00000035311.16	1069.57	895.357	0.574201	0.975034	0.256492
ENSMUSG00000034557.14	331.893	431.93	-0.571906	0.975022	-0.380079
ENSMUSG00000047786.12	123.237	194.565	-0.571813	0.975004	-0.658815
ENSMUSG00000028031.6	70.9086	47.0105	0.573164	0.974878	0.592978
ENSMUSG00000029447.11	450.838	334.016	0.573055	0.974862	0.43269
ENSMUSG00000015749.12	340.076	453.39	-0.570994	0.974849	-0.414898
ENSMUSG00000024491.16	227.8	333.158	-0.570814	0.974815	-0.54844
ENSMUSG00000056004.16	298.211	212.897	0.57256	0.974787	0.486177
ENSMUSG00000030168.13	666.682	455.44	0.572427	0.974767	0.549739
ENSMUSG00000002608.8	151.806	101.573	0.572104	0.974718	0.579718
ENSMUSG00000028927.6	774.757	641.148	0.57122	0.974584	0.273088
ENSMUSG00000036905.8	207.911	127.815	0.571135	0.974572	0.701903
ENSMUSG00000074513.9	189.078	268.583	-0.569375	0.974533	-0.50639
ENSMUSG00000025499.18	36.4188	66.5984	-0.569087	0.974476	-0.870805
ENSMUSG00000015488.14	53.3365	78.2044	-0.569074	0.974473	-0.552126
ENSMUSG00000005873.6	1042.07	874.016	0.569633	0.974345	0.253726
ENSMUSG00000015994.10	315.066	222.806	0.569203	0.97428	0.499864
ENSMUSG00000024960.9	60.6376	97.9549	-0.568018	0.974262	-0.691905
ENSMUSG00000032010.15	269.068	200.634	0.56902	0.974253	0.423407
ENSMUSG00000064115.13	1125.14	1361.86	-0.567309	0.974115	-0.275465
ENSMUSG00000020628.16	292.142	208.253	0.567525	0.974029	0.488329
ENSMUSG00000048707.9	803.937	643.892	0.567412	0.974012	0.320264
ENSMUSG00000034854.8	31.3057	56.7685	-0.566374	0.973922	-0.858665
ENSMUSG00000044080.9	83.734	133.112	-0.566206	0.973887	-0.668751
ENSMUSG00000027522.15	282.753	211.137	0.566187	0.973829	0.421365
ENSMUSG00000015291.10	990.039	826.981	0.566173	0.973827	0.25963
ENSMUSG00000054619.7	226.575	151.757	0.56597	0.973797	0.578228
ENSMUSG00000042406.8	430.068	318.875	0.565705	0.973758	0.431575
ENSMUSG00000032411.15	455.97	581.915	-0.565538	0.973744	-0.351867
ENSMUSG00000020329.12	120.854	80.6536	0.565411	0.973715	0.583452
ENSMUSG00000054793.8	581.299	450.513	0.564626	0.973599	0.367711
ENSMUSG00000021140.9	692.853	557.677	0.56383	0.973483	0.313121
ENSMUSG00000021270.13	5923.13	5362.75	0.563792	0.973478	0.143387
ENSMUSG00000041309.17	386.605	287.298	0.563197	0.973391	0.428311
ENSMUSG00000039105.6	143.423	213.403	-0.563519	0.973305	-0.5733
ENSMUSG00000028796.17	348.693	251.191	0.562495	0.97329	0.473173
ENSMUSG00000029602.11	243.317	181.39	0.561872	0.973201	0.423744
ENSMUSG00000027878.11	358.819	501.977	-0.563038	0.973198	-0.484362
ENSMUSG00000022052.9	851.573	721.408	0.56184	0.973196	0.239315
ENSMUSG00000054659.13	7.28901	20.4189	-0.562773	0.973139	-1.48611
ENSMUSG00000060733.13	192.431	272.144	-0.562479	0.973074	-0.500026
ENSMUSG00000020659.16	146.382	215.086	-0.56214	0.972998	-0.55518
ENSMUSG00000032637.15	745.524	610.689	0.560089	0.972949	0.287819
ENSMUSG00000036257.15	556.575	687.597	-0.561577	0.97287	-0.304987
ENSMUSG00000067713.7	59.2622	92.9584	-0.561414	0.972832	-0.649473
ENSMUSG00000024304.14	466.94	575.045	-0.561242	0.972793	-0.300438
ENSMUSG00000006575.14	213.855	289.589	-0.561044	0.972748	-0.437372
ENSMUSG00000060012.9	3213.73	2598.11	0.558622	0.972745	0.306787
ENSMUSG00000028696.12	89.0527	43.5526	0.557952	0.972655	1.0319
ENSMUSG00000040621.14	50.8541	28.2239	0.557677	0.972617	0.849447
ENSMUSG00000050088.9	108.515	71.1834	0.557376	0.972577	0.608278
ENSMUSG00000028284.13	382.416	285.08	0.556625	0.972475	0.423776
ENSMUSG00000030516.14	1963.04	2152.56	-0.559583	0.972411	-0.132963
ENSMUSG00000009828.15	972.625	781.25	0.555985	0.972391	0.3161
ENSMUSG00000019809.16	140.352	95.2565	0.555611	0.972342	0.559162
ENSMUSG00000035107.13	152.459	215.039	-0.559266	0.972336	-0.496177
ENSMUSG00000020134.13	362.695	509.271	-0.559123	0.972302	-0.489675
ENSMUSG00000035203.16	214.658	310.93	-0.558774	0.97222	-0.534548
ENSMUSG00000045896.14	216.067	140.987	0.554561	0.972205	0.615913
ENSMUSG00000031935.9	98.7205	69.1402	0.554477	0.972194	0.513824
ENSMUSG00000014767.17	206.303	140.525	0.554426	0.972187	0.553938
ENSMUSG00000037847.14	35.8715	58.8927	-0.55855	0.972167	-0.71525
ENSMUSG00000021936.14	306.184	402.426	-0.558527	0.972162	-0.394325
ENSMUSG00000048047.3	260.032	178.11	0.553796	0.972107	0.545927
ENSMUSG00000017686.17	418.218	313.529	0.553602	0.972083	0.415656
ENSMUSG00000024542.9	196.268	123.74	0.553485	0.972068	0.665509
ENSMUSG00000022257.4	339.689	250.157	0.553322	0.972047	0.441377
ENSMUSG00000046556.7	177.182	244.405	-0.558009	0.97204	-0.464043
ENSMUSG00000030522.14	881.579	710.634	0.552905	0.971994	0.310983
ENSMUSG00000032409.15	368.996	270.383	0.552677	0.971965	0.4486
ENSMUSG00000024687.11	477.579	361.11	0.551541	0.971825	0.403302
ENSMUSG00000040268.17	2132.82	1851.88	0.550701	0.971722	0.20377
ENSMUSG00000028114.16	147.941	88.8192	0.550304	0.971674	0.736077
ENSMUSG00000034206.15	49.3482	23.2658	0.54993	0.97163	1.08479
ENSMUSG00000029213.11	192.332	134.566	0.549873	0.971623	0.515287
ENSMUSG00000021910.15	1690.3	1966.29	-0.555467	0.971428	-0.2182
ENSMUSG00000031392.18	151.684	218.951	-0.555014	0.971317	-0.529545
ENSMUSG00000027660.16	739.355	1034.15	-0.555001	0.971314	-0.484109
ENSMUSG00000025024.7	198.255	139.248	0.547231	0.971314	0.509695
ENSMUSG00000041426.12	91.2121	58.706	0.547191	0.971309	0.635719
ENSMUSG00000038023.12	575.747	444.758	0.547091	0.971298	0.372414
ENSMUSG00000044934.13	135.003	79.2103	0.546873	0.971273	0.769229
ENSMUSG00000027860.15	206.096	121.969	0.546675	0.97125	0.756806
ENSMUSG00000040265.16	2304.6	2019.55	0.546481	0.971228	0.190482
ENSMUSG00000027300.10	52.3226	25.0357	0.54639	0.971217	1.06345
ENSMUSG00000079477.9	1016.5	862.589	0.545858	0.971158	0.236858
ENSMUSG00000024101.15	86.0406	58.8273	0.545673	0.971137	0.548531
ENSMUSG00000026478.14	531.095	427.569	0.54373	0.970922	0.312813
ENSMUSG00000028149.12	1289.98	1526.23	-0.553388	0.970919	-0.242621
ENSMUSG00000020661.15	836.819	686.399	0.543518	0.970899	0.285867
ENSMUSG00000005625.15	212.638	151.946	0.543501	0.970898	0.484843
[truncated: 418 more rows]

## Sheet: 2
	OPTO NOT FEAR_mean	SHAM NOT FEAR_mean	theta	prob	log2FC
ENSMUSG00000002546.17	39.4925	277.599	-2.64758	1	-2.81335
ENSMUSG00000016409.4	19.3002	227.976	-2.63154	1	-3.5622
ENSMUSG00000020196.10	52.0597	434.946	-2.73098	1	-3.0626
ENSMUSG00000020982.9	59.9568	453.963	-2.58418	1	-2.92058
ENSMUSG00000024241.7	73.406	727.624	-3.17772	1	-3.30922
ENSMUSG00000050148.9	174.054	784.388	-2.7423	1	-2.17204
ENSMUSG00000075706.10	39.3445	391.424	-2.58473	1	-3.3145
ENSMUSG00000000346.9	59.162	608.473	-2.71166	1	-3.36245
ENSMUSG00000020571.13	43.7457	334.254	-2.55799	1	-2.93373
ENSMUSG00000025240.10	43.9904	330.841	-2.74558	1	-2.91088
ENSMUSG00000026926.14	37.8168	290.477	-2.48582	1	-2.94133
ENSMUSG00000067924.4	33.4757	340.802	-2.68082	1	-3.34775
ENSMUSG00000074698.10	101.205	572.515	-2.55415	1	-2.50003
ENSMUSG00000023861.17	39.3109	351.115	-2.57738	1	-3.15894
ENSMUSG00000041073.10	47.0855	332.845	-2.55548	1	-2.82149
ENSMUSG00000045414.7	34.7969	457.607	-2.90503	1	-3.71708
ENSMUSG00000020694.17	44.453	381.249	-2.67397	1	-3.10038
ENSMUSG00000020823.16	82.1646	600.685	-2.63759	1	-2.87002
ENSMUSG00000028719.8	38.2658	235.583	-2.5237	1	-2.62211
ENSMUSG00000074093.4	63.0098	490.533	-2.82035	1	-2.9607
ENSMUSG00000021589.13	47.8469	449.711	-2.55921	1	-3.2325
ENSMUSG00000031617.16	47.5795	464.321	-2.82435	1	-3.28671
ENSMUSG00000031980.10	33.152	378.717	-2.63705	1	-3.51395
ENSMUSG00000046324.12	61.6384	652.307	-3.09082	1	-3.40365
ENSMUSG00000071650.6	51.5532	417.586	-2.47721	1	-3.01794
ENSMUSG00000074457.10	41.0499	309.988	-2.56605	1	-2.91676
ENSMUSG00000036955.16	79.4959	532.165	-2.53806	1	-2.74292
ENSMUSG00000062070.12	60.7296	421.151	-2.76307	1	-2.79387
ENSMUSG00000002881.14	29.9984	366.69	-2.90199	1	-3.61161
ENSMUSG00000027367.16	50.3259	346.508	-2.62607	1	-2.78352
ENSMUSG00000060716.7	421.783	1691.19	-2.49042	1	-2.00347
ENSMUSG00000028542.17	67.1318	778.017	-3.11543	1	-3.53473
ENSMUSG00000020720.13	31.6111	248.142	-2.64926	1	-2.97266
ENSMUSG00000024507.6	39.7807	322.763	-2.5461	1	-3.02033
ENSMUSG00000028444.17	55.4051	396.001	-2.56199	1	-2.83741
ENSMUSG00000033047.5	32.574	243.248	-2.6563	1	-2.90064
ENSMUSG00000020183.11	45.962	509.159	-2.67837	1	-3.4696
ENSMUSG00000028082.14	56.0678	451.12	-2.88152	1	-3.00827
ENSMUSG00000086583.3	54.429	573.541	-2.85016	1	-3.39745
ENSMUSG00000005609.16	67.9402	667.737	-3.23597	1	-3.29694
ENSMUSG00000039662.16	29.5397	242.263	-3.13516	1	-3.03585
ENSMUSG00000070923.4	57.3477	543.226	-2.95501	1	-3.24374
ENSMUSG00000040859.14	28.9613	273.484	-2.83473	1	-3.23925
ENSMUSG00000020831.18	2.43644	69.503	-3.15963	1	-4.83423
ENSMUSG00000024853.10	63.9747	526.098	-2.99078	1	-3.03976
ENSMUSG00000026781.17	98.6039	728.631	-3.14087	1	-2.88547
ENSMUSG00000025139.14	43.5156	319.188	-2.44927	1	-2.8748
ENSMUSG00000055733.6	23.4954	148.334	-2.44572	1	-2.65839
ENSMUSG00000033624.10	24.5092	186.33	-2.44456	1	-2.92647
ENSMUSG00000039270.9	108.127	485.903	-2.43719	1	-2.16794
ENSMUSG00000026663.6	47.1906	334.769	-2.4354	1	-2.8266
ENSMUSG00000030678.7	38.2883	271.684	-2.42742	1	-2.82696
ENSMUSG00000031715.14	189.864	758.37	-2.42548	1	-1.99794
ENSMUSG00000028015.3	33.9679	226.256	-2.05746	1	-2.73571
ENSMUSG00000030880.14	21.791	186.054	-2.06059	1	-3.09392
ENSMUSG00000020326.7	52.9195	323.066	-2.053	1	-2.60996
ENSMUSG00000058655.9	107.01	555.186	-2.06335	1	-2.37522
ENSMUSG00000079435.9	36.2308	286.883	-2.05132	1	-2.98518
ENSMUSG00000042903.8	27.3532	155.28	-2.04906	1	-2.5051
ENSMUSG00000006736.9	28.6302	178.814	-2.06592	1	-2.64285
ENSMUSG00000029179.14	23.5708	187.774	-2.0673	1	-2.99392
ENSMUSG00000026123.11	53.2446	408.35	-2.04717	1	-2.9391
ENSMUSG00000026511.7	30.3421	193.135	-2.04449	1	-2.67021
ENSMUSG00000084957.3	26.5497	206.558	-2.07029	1	-2.95978
ENSMUSG00000020687.13	51.5003	305.063	-2.07122	1	-2.56646
ENSMUSG00000024561.11	37.0498	186.207	-2.04278	1	-2.32936
ENSMUSG00000066900.11	25.3856	166.582	-2.04108	1	-2.71415
ENSMUSG00000041220.10	347.348	1101.57	-2.03974	1	-1.66511
ENSMUSG00000044465.19	29.7532	221.309	-2.03959	1	-2.89494
ENSMUSG00000058267.13	10.6066	87.529	-2.03631	1	-3.0448
ENSMUSG00000047216.8	40.8469	312.693	-2.07922	1	-2.93645
ENSMUSG00000060739.8	47.2616	308.169	-2.03379	1	-2.70498
ENSMUSG00000038388.14	45.8302	336.515	-2.40082	1	-2.8763
ENSMUSG00000067851.11	142.601	563.468	-2.08195	1	-1.98235
ENSMUSG00000031729.6	90.1613	499.292	-2.03234	1	-2.4693
ENSMUSG00000019039.14	23.5175	129.843	-2.03137	1	-2.46496
ENSMUSG00000051343.11	18.1934	159.154	-2.03118	1	-3.12894
ENSMUSG00000024712.9	29.1031	192.427	-2.03114	1	-2.72507
ENSMUSG00000027854.12	41.3076	252.295	-2.03103	1	-2.61063
ENSMUSG00000013593.12	34.0939	252.492	-2.08352	1	-2.88865
ENSMUSG00000021219.16	27.2184	153.295	-2.08395	1	-2.49366
ENSMUSG00000055371.17	35.3553	223.209	-2.08401	1	-2.6584
ENSMUSG00000038375.15	583.209	1866.7	-2.02883	1	-1.67841
ENSMUSG00000032026.7	20.0969	138.053	-2.02798	1	-2.78018
ENSMUSG00000047368.4	163.45	650.641	-2.39574	1	-1.99301
ENSMUSG00000025591.6	36.4168	298.713	-2.02681	1	-3.03609
ENSMUSG00000003269.17	23.5539	139.319	-2.02672	1	-2.56436
ENSMUSG00000027201.16	125.219	442.623	-2.02611	1	-1.82163
ENSMUSG00000028409.11	26.924	183.414	-2.39309	1	-2.76814
ENSMUSG00000046404.5	29.3622	234.653	-2.02181	1	-2.9985
ENSMUSG00000028969.10	29.0529	196.135	-2.02139	1	-2.75509
ENSMUSG00000063856.7	22.545	173.299	-2.09614	1	-2.94238
ENSMUSG00000019889.10	61.1961	426.507	-2.09671	1	-2.80106
ENSMUSG00000032582.14	83.2305	392.158	-2.01446	1	-2.23625
ENSMUSG00000042605.16	287.191	878.446	-2.01427	1	-1.61294
ENSMUSG00000001151.10	41.8967	278.227	-2.01311	1	-2.73135
ENSMUSG00000020064.9	47.8498	342.026	-2.381	1	-2.83752
ENSMUSG00000025978.14	81.0294	422.059	-2.37783	1	-2.38093
ENSMUSG00000025728.16	54.2257	321.906	-2.10582	1	-2.56959
ENSMUSG00000041997.16	130.889	544.259	-2.10609	1	-2.05595
ENSMUSG00000024974.10	241.426	873.92	-2.37509	1	-1.85592
ENSMUSG00000037172.14	310.546	923.314	-2.00298	1	-1.57201
ENSMUSG00000070372.11	46.1839	275.961	-2.00272	1	-2.579
ENSMUSG00000014907.10	17.974	125.34	-2.00194	1	-2.80186
ENSMUSG00000031483.8	39.5454	261.595	-1.99722	1	-2.72575
ENSMUSG00000018999.14	35.7682	223.403	-2.36617	1	-2.6429
ENSMUSG00000031583.13	34.146	260.473	-2.36614	1	-2.93135
ENSMUSG00000002015.5	28.4463	148.957	-1.99372	0.999999	-2.38859
ENSMUSG00000017670.16	48.5247	310.004	-2.12247	0.999999	-2.6755
ENSMUSG00000021846.9	38.7674	263.333	-1.98795	0.999999	-2.76397
ENSMUSG00000039770.6	38.3834	230.093	-1.9869	0.999999	-2.58366
ENSMUSG00000037259.15	36.4766	352.912	-2.12648	0.999999	-3.27426
ENSMUSG00000059070.16	35.0895	209.995	-1.9832	0.999998	-2.58125
ENSMUSG00000041762.16	163.512	792.228	-2.35313	0.999998	-2.27652
ENSMUSG00000002279.19	24.595	203.074	-2.35239	0.999998	-3.04557
ENSMUSG00000044098.14	44.45	299.709	-2.35128	0.999998	-2.75331
ENSMUSG00000042015.17	24.0872	152.506	-1.98077	0.999998	-2.66253
ENSMUSG00000034484.8	45.0168	306.089	-2.13245	0.999997	-2.76542
ENSMUSG00000066129.15	1282.92	2961.24	-1.72122	0.999997	-1.20677
ENSMUSG00000026173.15	40.2975	243.243	-1.72055	0.999997	-2.59363
ENSMUSG00000041607.17	32959.8	64983.4	-1.72002	0.999997	-0.979364
ENSMUSG00000039230.14	37.293	207.084	-1.72587	0.999997	-2.47324
ENSMUSG00000052040.10	429.813	1543.23	-1.97834	0.999997	-1.84417
ENSMUSG00000033039.10	506.702	1349.93	-1.71705	0.999997	-1.41367
ENSMUSG00000035770.8	811.908	1724.05	-1.71657	0.999997	-1.08641
ENSMUSG00000037692.14	57.8547	208.737	-1.7272	0.999996	-1.85118
ENSMUSG00000031342.17	5878.75	9052.81	-1.71427	0.999996	-0.622856
ENSMUSG00000027598.16	272.423	941.796	-2.13606	0.999996	-1.78957
ENSMUSG00000002372.9	66.5873	243.673	-1.7296	0.999996	-1.87163
ENSMUSG00000057530.14	48.0312	252.688	-1.73005	0.999996	-2.39531
ENSMUSG00000029326.13	30.6453	136.882	-1.73022	0.999996	-2.15919
ENSMUSG00000068580.11	9.89871	54.4032	-1.71314	0.999996	-2.45838
ENSMUSG00000030307.8	308.12	825.004	-1.73042	0.999995	-1.42091
ENSMUSG00000019883.11	37.2137	242.934	-2.13692	0.999995	-2.70666
ENSMUSG00000026860.16	32.4215	214.348	-2.1371	0.999995	-2.72493
ENSMUSG00000027679.13	19.1704	104.6	-1.73155	0.999995	-2.44793
ENSMUSG00000087408.10	27.4258	154.499	-1.73533	0.999993	-2.49399
ENSMUSG00000029221.15	88.9739	400.688	-2.34147	0.999992	-2.17103
ENSMUSG00000005469.10	38.6776	197.604	-1.70637	0.999992	-2.35304
ENSMUSG00000026469.14	195.914	723.165	-2.14313	0.999991	-1.8841
ENSMUSG00000032905.5	31.3356	154.543	-1.73803	0.999991	-2.30214
ENSMUSG00000027680.15	148.312	602.825	-2.33937	0.99999	-2.0231
ENSMUSG00000017466.9	206.354	645.831	-1.73827	0.99999	-1.64603
ENSMUSG00000041720.14	227.291	753.65	-2.1438	0.99999	-1.72935
ENSMUSG00000033102.15	23.0671	201.788	-2.14398	0.99999	-3.12893
ENSMUSG00000028639.14	161.839	486.754	-1.73881	0.99999	-1.58864
ENSMUSG00000030987.5	36.4761	248.841	-1.96732	0.99999	-2.7702
ENSMUSG00000115987.1	21.0554	146.888	-1.96724	0.999989	-2.80245
ENSMUSG00000042323.17	305.127	715.15	-1.70281	0.999988	-1.22884
ENSMUSG00000024941.9	34.0721	165.423	-1.70219	0.999988	-2.2795
ENSMUSG00000001542.7	101.573	366.98	-1.70098	0.999986	-1.85318
ENSMUSG00000061479.15	20.1704	95.5004	-1.70082	0.999986	-2.24327
ENSMUSG00000029455.14	25.0469	120.875	-1.70049	0.999986	-2.27081
ENSMUSG00000054942.13	86.7279	367.335	-1.74228	0.999985	-2.08253
ENSMUSG00000032504.15	341.924	1051.29	-1.74258	0.999985	-1.62042
ENSMUSG00000031226.13	17.7157	129.535	-1.96299	0.999984	-2.87024
ENSMUSG00000027677.17	174.143	516.92	-1.69943	0.999984	-1.56967
ENSMUSG00000002984.17	11.5057	106.458	-1.96274	0.999984	-3.20986
ENSMUSG00000023075.9	75.3134	276.178	-1.69829	0.999982	-1.87462
ENSMUSG00000020130.9	70.1667	417.048	-2.14983	0.999981	-2.57135
ENSMUSG00000038384.16	92.1435	299.44	-1.74525	0.99998	-1.70031
ENSMUSG00000041203.9	21.5026	125.87	-1.69676	0.99998	-2.54936
ENSMUSG00000026021.15	31.5887	177.618	-1.95878	0.999976	-2.4913
ENSMUSG00000024835.15	27.6957	146.935	-1.95875	0.999976	-2.40745
ENSMUSG00000091957.3	18.4168	91.4577	-1.69326	0.999972	-2.31209
ENSMUSG00000023068.16	31.8163	242.512	-2.32902	0.999972	-2.93022
ENSMUSG00000015536.14	23.936	141.899	-1.7492	0.999971	-2.56762
ENSMUSG00000030739.18	121.668	450.815	-1.95571	0.999969	-1.88959
ENSMUSG00000032854.12	2806.41	5326.4	-1.75067	0.999967	-0.924436
ENSMUSG00000027411.17	17.7107	109.664	-1.69109	0.999966	-2.63039
ENSMUSG00000045427.13	46.8459	274.772	-1.95437	0.999965	-2.55224
ENSMUSG00000052430.15	46.2638	305.008	-2.32642	0.999964	-2.72089
ENSMUSG00000046152.16	16.9766	85.4699	-1.6891	0.99996	-2.33187
ENSMUSG00000039470.15	24.8895	191.514	-1.95249	0.999959	-2.94384
ENSMUSG00000057329.7	39.6358	161.911	-1.68807	0.999957	-2.03033
ENSMUSG00000019254.16	34.945	169.837	-1.68763	0.999955	-2.28099
ENSMUSG00000012422.14	34.7744	226.532	-2.15903	0.999954	-2.70362
ENSMUSG00000020948.9	93.904	324.638	-1.68635	0.99995	-1.78957
ENSMUSG00000030706.17	82.269	348.453	-1.75606	0.999946	-2.08254
ENSMUSG00000068882.13	102.042	371.283	-1.94896	0.999945	-1.86336
ENSMUSG00000023007.15	30.3843	148	-1.68387	0.99994	-2.2842
ENSMUSG00000047539.9	30.7447	155.736	-1.68348	0.999938	-2.34069
ENSMUSG00000035152.14	201.638	683.722	-1.94722	0.999937	-1.76164
ENSMUSG00000026718.17	186.726	561.464	-1.75857	0.999933	-1.58827
ENSMUSG00000021905.14	19.8215	106.491	-1.75866	0.999932	-2.4256
ENSMUSG00000050697.9	36.2319	250.706	-1.94574	0.999929	-2.79067
ENSMUSG00000014550.14	30.2625	167.53	-1.94456	0.999923	-2.46882
ENSMUSG00000021024.14	34.4409	186.38	-2.1655	0.999919	-2.43605
ENSMUSG00000023460.13	34.0694	168.956	-1.76092	0.999918	-2.31009
ENSMUSG00000029427.11	64.1771	262.293	-1.67946	0.999916	-2.03105
ENSMUSG00000033352.11	42.005	353.17	-2.16617	0.999915	-3.07173
ENSMUSG00000024135.10	20.49	161.626	-1.94201	0.999906	-2.97967
ENSMUSG00000032652.13	18.8136	121.924	-1.94196	0.999906	-2.69613
ENSMUSG00000037355.14	29.6618	177.991	-2.16827	0.999899	-2.58512
ENSMUSG00000022964.14	37.6982	211.592	-1.93997	0.999892	-2.48872
ENSMUSG00000006356.10	22.9491	111.224	-1.67584	0.999891	-2.27696
ENSMUSG00000022159.16	21.2619	146.927	-1.93944	0.999887	-2.78876
ENSMUSG00000002608.8	27.672	141.033	-1.76568	0.999881	-2.34953
ENSMUSG00000014846.12	34.0282	224.467	-1.93853	0.99988	-2.7217
ENSMUSG00000042032.13	23.9943	151.067	-1.93759	0.999872	-2.65442
ENSMUSG00000035069.3	12.7545	86.0248	-1.93752	0.999871	-2.75374
ENSMUSG00000009863.14	26.9903	140.987	-1.93697	0.999866	-2.38505
ENSMUSG00000035437.15	253.307	716.492	-1.6713	0.999852	-1.50006
ENSMUSG00000032766.9	13.3171	110.978	-1.93535	0.999851	-3.05893
ENSMUSG00000029406.15	83.16	427.548	-1.67115	0.999851	-2.36213
ENSMUSG00000003038.15	35.5121	262.624	-2.17348	0.999848	-2.88662
ENSMUSG00000062591.5	4096.72	7381.02	-1.67055	0.999845	-0.849352
ENSMUSG00000044864.16	37.4206	219.866	-1.93409	0.999838	-2.55472
ENSMUSG00000038372.14	9.44144	74.6945	-1.93401	0.999837	-2.98392
ENSMUSG00000032307.16	32.6525	203.155	-1.66871	0.999826	-2.63732
ENSMUSG00000054863.9	33.5746	214.636	-2.17554	0.999822	-2.67645
ENSMUSG00000058360.5	22.3577	129.834	-1.77169	0.999814	-2.53783
ENSMUSG00000019876.15	58.9044	242.351	-1.772	0.99981	-2.04065
ENSMUSG00000001105.15	16.5271	75.7815	-1.77204	0.999809	-2.19701
ENSMUSG00000021610.8	29.1006	194.279	-1.93077	0.9998	-2.73901
ENSMUSG00000055850.12	43.8365	301.955	-1.66633	0.999798	-2.78413
ENSMUSG00000025816.15	41.9755	226.463	-1.77308	0.999795	-2.43166
ENSMUSG00000025894.11	19.3053	92.158	-1.77321	0.999793	-2.25511
ENSMUSG00000041895.15	97.5596	344.458	-1.66575	0.999791	-1.81997
ENSMUSG00000042429.8	45.7623	324.997	-2.17784	0.99979	-2.82819
ENSMUSG00000054309.9	30.1066	185.531	-1.77339	0.99979	-2.62351
ENSMUSG00000038718.15	25.5631	132.205	-1.66519	0.999784	-2.37064
ENSMUSG00000071180.5	32.2471	287.406	-2.17831	0.999783	-3.15585
ENSMUSG00000054619.7	27.5355	144.573	-1.77414	0.999779	-2.39244
ENSMUSG00000021782.14	59.6636	325.37	-1.92904	0.999778	-2.44716
ENSMUSG00000022604.18	109.56	501.006	-1.77494	0.999767	-2.19311
ENSMUSG00000030726.16	14.7666	92.6167	-1.66333	0.999759	-2.64894
ENSMUSG00000027341.10	25.1482	159.562	-1.92725	0.999753	-2.66559
ENSMUSG00000032977.9	12.8311	77.2837	-1.77698	0.999733	-2.59052
ENSMUSG00000043090.18	34.1995	215.446	-1.92573	0.99973	-2.65528
ENSMUSG00000032410.13	110.556	464.374	-1.92566	0.999729	-2.07051
ENSMUSG00000025487.15	21.3511	143.562	-1.77724	0.999729	-2.7493
ENSMUSG00000053581.13	25.3104	132.44	-1.66119	0.999728	-2.38754
ENSMUSG00000031513.8	29.3892	135.513	-1.77822	0.999711	-2.20507
ENSMUSG00000036469.16	28.5132	145.966	-1.77841	0.999708	-2.35593
ENSMUSG00000066443.5	8.60242	153.166	-1.6595	0.999702	-4.15421
ENSMUSG00000032285.15	15.7721	81.7104	-1.65925	0.999698	-2.37314
ENSMUSG00000021376.11	17.3869	95.9476	-1.78013	0.999674	-2.46425
ENSMUSG00000037706.17	2017.01	3880.01	-1.65752	0.999669	-0.943839
ENSMUSG00000038517.15	18.8507	87.3945	-1.92189	0.999666	-2.21293
ENSMUSG00000031988.10	35.7355	233.528	-1.92113	0.999652	-2.70817
ENSMUSG00000045896.14	29.6103	235.792	-2.29698	0.999642	-2.99334
ENSMUSG00000034342.9	315.376	737.21	-1.65562	0.999636	-1.225
ENSMUSG00000051790.15	52.0221	314.711	-2.18713	0.999615	-2.59683
ENSMUSG00000029249.15	28.0009	186.508	-1.65388	0.999603	-2.73569
ENSMUSG00000018559.16	24.2757	125.94	-1.65318	0.999589	-2.37515
ENSMUSG00000029617.10	31.8561	180.988	-2.29375	0.999566	-2.50625
ENSMUSG00000028648.13	28.7257	143.034	-1.78504	0.999565	-2.31595
ENSMUSG00000061666.6	20.7677	123.016	-1.91663	0.999564	-2.56643
ENSMUSG00000024500.20	34.0654	124.886	-1.65086	0.999542	-1.87423
ENSMUSG00000029462.18	33.0877	282.192	-2.29232	0.999529	-3.09231
ENSMUSG00000090862.3	75.0966	309.85	-1.64901	0.999502	-2.04475
ENSMUSG00000021706.14	41.5515	241.022	-1.78854	0.999473	-2.53619
ENSMUSG00000026260.12	38.7231	242.549	-2.28764	0.999394	-2.64701
ENSMUSG00000021709.14	3394.86	5888.22	-1.64437	0.999393	-0.794478
ENSMUSG00000025860.15	164.063	622.053	-1.79185	0.999376	-1.92279
ENSMUSG00000029512.11	52.8997	262.191	-1.90656	0.99932	-2.30929
ENSMUSG00000041025.15	9.78432	50.6768	-1.64134	0.999316	-2.37278
ENSMUSG00000062866.16	59.1198	333.633	-1.90485	0.999273	-2.49655
ENSMUSG00000020922.11	34.58	188.815	-1.79575	0.99925	-2.44896
ENSMUSG00000076439.12	857.385	2150.05	-1.63872	0.999247	-1.32635
ENSMUSG00000068921.14	24.352	130.99	-1.90388	0.999245	-2.42734
ENSMUSG00000020650.15	36.0157	161.783	-1.63836	0.999237	-2.16736
ENSMUSG00000026618.11	33.5793	218.832	-2.20029	0.999228	-2.70418
ENSMUSG00000025858.12	21.9314	126.292	-1.63756	0.999215	-2.5257
ENSMUSG00000028096.13	22.6381	116.622	-1.79719	0.9992	-2.36501
ENSMUSG00000048758.14	37.9434	356.556	-2.20139	0.999188	-3.23221
ENSMUSG00000028995.14	43.3294	332.033	-2.28092	0.999166	-2.93791
ENSMUSG00000038042.11	137.862	617.353	-2.28072	0.999159	-2.16287
ENSMUSG00000020741.17	37.9841	247.907	-1.90064	0.999151	-2.70633
ENSMUSG00000048076.14	75.515	376.487	-2.20272	0.99914	-2.31777
ENSMUSG00000049517.8	59.6711	481.86	-1.8997	0.999123	-3.01351
ENSMUSG00000066643.12	27.5871	139.652	-1.8993	0.999111	-2.33977
ENSMUSG00000031467.10	50.9016	250.446	-1.6334	0.999098	-2.29871
ENSMUSG00000024560.7	27.4117	104.217	-1.63276	0.99908	-1.92672
ENSMUSG00000075595.9	459.647	1047.8	-1.63203	0.999058	-1.18877
ENSMUSG00000066232.4	274.534	620.504	-1.63188	0.999054	-1.17646
ENSMUSG00000066149.11	30.0109	179.447	-1.89676	0.999033	-2.58
ENSMUSG00000002455.14	33.2979	186.867	-2.27706	0.999021	-2.48851
ENSMUSG00000094910.1	35.9924	346.807	-1.80215	0.999018	-3.26837
ENSMUSG00000035566.7	572.414	1260.07	-1.62893	0.998968	-1.13837
ENSMUSG00000027858.13	4649.15	10131.1	-1.62816	0.998945	-1.12375
ENSMUSG00000031834.15	35.9484	198.41	-1.80571	0.99888	-2.46449
ENSMUSG00000033419.16	71.7439	406.22	-1.62578	0.998875	-2.50133
ENSMUSG00000006699.17	339.599	1011.69	-1.89124	0.998857	-1.57486
ENSMUSG00000042570.14	10.8213	84.0492	-1.62512	0.998855	-2.95736
ENSMUSG00000020604.13	36.1455	199.377	-1.8908	0.998843	-2.46361
ENSMUSG00000073600.5	20.1556	93.6375	-1.6245	0.998837	-2.2159
ENSMUSG00000038264.8	28.3711	163.138	-1.62381	0.998816	-2.5236
ENSMUSG00000058997.8	104.381	367.181	-1.80753	0.998809	-1.81463
ENSMUSG00000035093.16	2464.74	4318.42	-2.21195	0.99878	-0.809069
ENSMUSG00000029426.8	798.744	1590.11	-1.62253	0.998778	-0.99332
ENSMUSG00000022744.12	211.273	650.299	-1.88879	0.998778	-1.622
ENSMUSG00000040044.11	76.5078	258.11	-1.62219	0.998768	-1.75431
ENSMUSG00000041879.13	164.387	505.462	-1.80865	0.998764	-1.62051
ENSMUSG00000079316.10	26.3086	137.884	-1.62193	0.998761	-2.38985
ENSMUSG00000021094.10	17.5919	97.8896	-1.62092	0.998731	-2.47625
ENSMUSG00000078584.9	43.4741	170.295	-1.50225	0.998731	-1.96981
ENSMUSG00000024050.18	53.938	192.82	-1.50217	0.998731	-1.83788
ENSMUSG00000016637.7	6.85014	39.7308	-1.50302	0.99873	-2.53605
ENSMUSG00000025203.6	14491.2	20523.8	-1.50111	0.998729	-0.502122
ENSMUSG00000060743.12	110.74	461.436	-1.88722	0.998727	-2.05895
ENSMUSG00000026811.18	17.5325	109.866	-1.50459	0.998726	-2.64763
ENSMUSG00000026888.14	111.24	390.403	-1.50622	0.998718	-1.81129
ENSMUSG00000030772.6	43.948	203.773	-1.49782	0.998713	-2.2131
ENSMUSG00000029148.15	36.4122	156.871	-1.49764	0.998711	-2.10709
ENSMUSG00000039519.6	16.7961	97.7298	-1.61974	0.998697	-2.54067
ENSMUSG00000044452.10	27.0855	119.157	-1.61974	0.998697	-2.13727
ENSMUSG00000059423.13	26.5213	167.05	-1.81071	0.998682	-2.65505
ENSMUSG00000023953.9	16.7492	76.4319	-1.51161	0.998666	-2.19008
ENSMUSG00000035517.17	43.7716	161.772	-1.49381	0.998665	-1.88589
ENSMUSG00000003200.10	22.0157	138.355	-1.81126	0.99866	-2.65177
ENSMUSG00000031931.4	11.9174	100.704	-1.88484	0.99865	-3.07898
ENSMUSG00000003762.13	15.6353	74.0273	-1.49291	0.99865	-2.24325
ENSMUSG00000029714.11	29.9732	152.075	-1.51291	0.998649	-2.34303
ENSMUSG00000032666.16	42.2936	274.883	-2.21531	0.998647	-2.70031
ENSMUSG00000098374.1	28.0833	117.772	-1.61772	0.998639	-2.06821
ENSMUSG00000032412.8	424.069	1021.21	-1.49174	0.998628	-1.26791
ENSMUSG00000034190.9	35.003	186.843	-1.49146	0.998622	-2.41628
ENSMUSG00000028430.14	49.6592	174.374	-1.49086	0.998609	-1.81205
ENSMUSG00000102252.5	64.8229	501.761	-2.21646	0.998602	-2.95243
ENSMUSG00000041303.7	22.4051	151.672	-1.81341	0.998575	-2.75906
ENSMUSG00000032370.8	15.484	61.4505	-1.48934	0.998574	-1.98865
ENSMUSG00000036634.15	2762.39	5623.59	-1.51823	0.998562	-1.02557
ENSMUSG00000021771.14	81.5596	268.915	-1.51825	0.998562	-1.72122
ENSMUSG00000005981.11	29.5792	128.846	-1.48777	0.998531	-2.12299
ENSMUSG00000025337.10	58.1148	263.076	-1.52028	0.998524	-2.1785
ENSMUSG00000027384.6	13.0396	56.2978	-1.48729	0.998518	-2.11018
ENSMUSG00000020561.8	23.5457	92.6653	-1.48628	0.998487	-1.97656
ENSMUSG00000041530.17	115.214	399.762	-1.48615	0.998483	-1.79483
ENSMUSG00000028843.8	15.5968	59.7084	-1.52317	0.998467	-1.93668
ENSMUSG00000022634.9	32.6302	235.966	-1.87904	0.998464	-2.8543
ENSMUSG00000041777.12	26.488	117.817	-1.48546	0.998461	-2.15314
ENSMUSG00000036199.9	14.4604	77.5816	-1.61084	0.998449	-2.4236
ENSMUSG00000022680.14	255.255	614.261	-1.52426	0.998445	-1.26691
ENSMUSG00000022228.14	54.9922	370.298	-2.26175	0.998426	-2.75139
ENSMUSG00000000416.16	108.11	417.183	-1.87755	0.998418	-1.94818
ENSMUSG00000026664.7	22.562	175.549	-1.81774	0.99841	-2.9599
ENSMUSG00000044986.10	15.5907	87.8796	-1.81806	0.998398	-2.49484
ENSMUSG00000025742.5	31.6417	132.721	-1.60878	0.998396	-2.0685
ENSMUSG00000030603.16	36.2532	162.337	-1.81918	0.998357	-2.16281
ENSMUSG00000021785.8	29.3245	129.694	-1.5294	0.998341	-2.14493
ENSMUSG00000027253.15	180.012	489.048	-1.60594	0.998326	-1.44188
ENSMUSG00000001482.15	30.188	160.109	-1.87442	0.998323	-2.40701
ENSMUSG00000044768.16	126.108	452.924	-1.53114	0.998306	-1.8446
ENSMUSG00000021302.10	56.7916	205.467	-1.48123	0.998304	-1.85516
ENSMUSG00000026843.15	40.0574	211.251	-1.82097	0.998293	-2.39882
ENSMUSG00000026356.15	72.8731	247.107	-1.53304	0.998269	-1.76168
ENSMUSG00000027167.11	23.5887	115.311	-1.53361	0.998258	-2.28937
ENSMUSG00000079215.8	200.732	540.586	-1.53495	0.998233	-1.42926
ENSMUSG00000003848.14	9.6955	55.5487	-1.60169	0.99823	-2.51837
ENSMUSG00000024944.6	18.7724	103.006	-1.6009	0.998213	-2.45604
ENSMUSG00000029207.16	271.654	811.233	-1.87043	0.998209	-1.57834
ENSMUSG00000037669.15	26.8973	229.395	-1.87029	0.998205	-3.0923
ENSMUSG00000015087.14	94.9458	350.086	-1.82364	0.998203	-1.88253
ENSMUSG00000002963.17	11.9187	53.4035	-1.53668	0.998201	-2.1637
ENSMUSG00000045730.4	6.28039	50.798	-1.59991	0.998193	-3.01585
ENSMUSG00000075284.10	81.3932	397.338	-1.82428	0.998183	-2.28739
ENSMUSG00000113949.1	12.9071	109.074	-1.86936	0.99818	-3.07906
ENSMUSG00000015714.11	468.514	1301.82	-1.53816	0.998174	-1.47437
ENSMUSG00000005225.15	21.7784	116.068	-1.53823	0.998173	-2.414
ENSMUSG00000026879.14	744.179	2041.11	-1.82468	0.99817	-1.45563
ENSMUSG00000024513.16	33.7989	211.47	-1.82475	0.998168	-2.6454
ENSMUSG00000025133.9	43.4409	248.392	-2.22976	0.998167	-2.51549
ENSMUSG00000036698.11	195.724	547.07	-1.53886	0.998162	-1.48291
ENSMUSG00000033991.9	47.2748	213.035	-1.53903	0.998159	-2.17195
ENSMUSG00000034981.9	38.8242	199.773	-2.25277	0.998157	-2.36333
ENSMUSG00000052593.16	86.0059	392.164	-1.59798	0.998155	-2.18895
ENSMUSG00000030528.12	15.7397	77.5184	-1.54011	0.998141	-2.30013
ENSMUSG00000047459.14	53.2576	257.785	-1.47749	0.998139	-2.27511
ENSMUSG00000037210.16	122.663	400.173	-1.59663	0.99813	-1.70592
ENSMUSG00000057691.8	22.3866	139.621	-1.8674	0.998129	-2.64081
ENSMUSG00000019969.14	43.5002	346.966	-2.25121	0.998124	-2.9957
ENSMUSG00000063480.8	43.7862	239.865	-1.59624	0.998123	-2.45368
ENSMUSG00000037625.7	3178.06	5846.57	-1.59612	0.998121	-0.879443
ENSMUSG00000032517.16	12972	26434.9	-1.59561	0.998112	-1.02704
ENSMUSG00000038058.14	13.0891	87.6091	-1.54221	0.998107	-2.74272
ENSMUSG00000034152.6	87.536	300.228	-1.54246	0.998103	-1.77811
ENSMUSG00000023118.15	274.059	648.911	-1.59508	0.998103	-1.24353
ENSMUSG00000003458.12	45.673	183.09	-1.47664	0.998098	-2.00314
ENSMUSG00000013419.7	34.6458	200.979	-1.86594	0.998092	-2.5363
ENSMUSG00000079557.11	35.3076	167.194	-1.47644	0.998089	-2.24348
ENSMUSG00000053044.8	3.25687	25.7798	-1.86555	0.998083	-2.98468
ENSMUSG00000023087.15	2965.71	4030.69	-1.54388	0.998082	-0.442649
ENSMUSG00000027339.15	249.419	808.423	-1.86519	0.998074	-1.69654
ENSMUSG00000004902.7	37.3859	189.777	-1.82812	0.998069	-2.34374
ENSMUSG00000025979.13	51.7845	215.868	-1.59297	0.998069	-2.05956
ENSMUSG00000064138.14	153.792	410.699	-1.59244	0.998061	-1.4171
ENSMUSG00000027706.8	300.395	832.969	-1.59236	0.998059	-1.4714
ENSMUSG00000024068.8	92.9141	294.439	-1.54561	0.998057	-1.664
ENSMUSG00000034032.15	26.2714	114.795	-1.54585	0.998054	-2.1275
ENSMUSG00000026827.12	58.6001	361.576	-2.23686	0.998045	-2.62532
ENSMUSG00000008734.9	691.65	1335.6	-1.54726	0.998035	-0.949376
ENSMUSG00000028914.13	9.49181	52.2753	-1.54783	0.998028	-2.46137
ENSMUSG00000006782.16	3730.01	6861.98	-1.54793	0.998027	-0.879446
ENSMUSG00000071793.12	64.5125	415.725	-2.23952	0.998026	-2.68798
ENSMUSG00000020564.17	31.2251	167.143	-1.86305	0.998026	-2.42031
ENSMUSG00000074102.4	26.8909	108.656	-1.54866	0.998018	-2.01457
ENSMUSG00000031202.5	22.8733	129.941	-1.54911	0.998012	-2.50612
ENSMUSG00000033998.9	32.9701	138.131	-1.47489	0.998011	-2.0668
ENSMUSG00000000827.18	30.8303	174.048	-1.58881	0.99801	-2.49706
ENSMUSG00000042055.13	46.3076	250.753	-1.83122	0.997992	-2.43694
ENSMUSG00000018921.11	13.7532	69.0342	-1.55107	0.99799	-2.32754
ENSMUSG00000029778.12	351.822	789.842	-1.55134	0.997987	-1.16672
ENSMUSG00000027281.16	13.6942	84.551	-1.86104	0.997984	-2.62625
ENSMUSG00000058192.16	26.5363	169.446	-1.55213	0.997979	-2.67479
ENSMUSG00000026082.11	35.5766	138.414	-1.58587	0.997976	-1.95999
ENSMUSG00000037326.10	32.9114	146.386	-1.58556	0.997972	-2.15312
ENSMUSG00000071649.6	17.5434	89.7052	-1.58495	0.997966	-2.35426
ENSMUSG00000027375.14	3136.32	6808.22	-1.85985	0.997961	-1.11821
ENSMUSG00000002985.16	3668.87	4760.27	-1.47385	0.997957	-0.375707
ENSMUSG00000028223.8	23.1976	95.4549	-1.85937	0.997952	-2.04084
ENSMUSG00000031974.8	21.4148	104.916	-1.55535	0.99795	-2.29256
ENSMUSG00000040165.14	20.4713	86.3083	-1.47353	0.99794	-2.0759
ENSMUSG00000041840.8	80.142	288.243	-1.55748	0.997933	-1.84665
ENSMUSG00000030088.15	39.8232	227.958	-1.8579	0.997927	-2.51709
ENSMUSG00000025810.9	17.2653	75.6501	-1.57982	0.997924	-2.13146
ENSMUSG00000005881.13	22.5452	105.049	-1.55908	0.997923	-2.22016
ENSMUSG00000028351.5	30.1113	161.818	-1.57952	0.997922	-2.426
ENSMUSG00000001138.13	27.5573	170.831	-1.83481	0.99792	-2.63206
ENSMUSG00000004070.15	55.4603	232.657	-1.55986	0.997918	-2.06868
ENSMUSG00000020778.12	6.98208	60.6082	-1.57824	0.997914	-3.11778
ENSMUSG00000048175.13	16.758	67.3981	-1.47298	0.997911	-2.00786
ENSMUSG00000015806.12	1227.83	1922.66	-1.56183	0.997908	-0.64699
ENSMUSG00000063535.7	16.3332	82.8944	-1.57685	0.997907	-2.34347
ENSMUSG00000028476.13	18.2169	84.718	-1.57654	0.997906	-2.21739
ENSMUSG00000020923.17	77.0079	235.643	-1.56277	0.997904	-1.61352
ENSMUSG00000026374.14	55.7529	225.103	-1.57607	0.997904	-2.01347
ENSMUSG00000036026.15	57.1123	260.858	-1.85643	0.997904	-2.19139
ENSMUSG00000034432.11	24.5461	116.118	-1.57546	0.997902	-2.24203
ENSMUSG00000041765.6	16.6972	96.6559	-1.8359	0.997901	-2.53326
ENSMUSG00000068739.13	40.1505	223.188	-1.83592	0.997901	-2.47477
ENSMUSG00000040033.16	27.4302	117.812	-1.47279	0.997901	-2.10266
ENSMUSG00000109449.3	4.78026	19.8951	-1.57477	0.997899	-2.05725
ENSMUSG00000031935.9	17.0205	98.9961	-1.56426	0.997899	-2.5401
ENSMUSG00000024661.7	13115.8	23352.9	-1.56431	0.997899	-0.832293
ENSMUSG00000024614.7	149.998	490.35	-1.47275	0.997899	-1.70887
ENSMUSG00000031425.15	58736.4	107378	-1.57422	0.997897	-0.870372
ENSMUSG00000021965.3	9.65681	49.4236	-1.56613	0.997894	-2.35558
ENSMUSG00000074513.9	39.0861	196.137	-1.56643	0.997894	-2.32714
ENSMUSG00000032131.16	14.9359	68.8837	-1.57233	0.997893	-2.20537
ENSMUSG00000031357.3	27.8144	191.324	-1.85553	0.997891	-2.78211
ENSMUSG00000037029.8	20.9738	116.258	-1.56988	0.997891	-2.47067
ENSMUSG00000028696.12	7.85941	70.8448	-1.56966	0.997891	-3.17217
ENSMUSG00000029833.17	230.444	646.731	-1.83846	0.997866	-1.48875
ENSMUSG00000035181.6	47.5214	276.05	-1.85146	0.997846	-2.53828
ENSMUSG00000027775.9	25.5185	144.199	-1.84042	0.997846	-2.49845
ENSMUSG00000059810.18	116.86	413.088	-1.47158	0.997835	-1.82167
ENSMUSG00000039047.17	36.088	218.254	-1.84755	0.997825	-2.59642
ENSMUSG00000022110.13	37.8494	178.336	-1.47093	0.997799	-2.23626
ENSMUSG00000011096.17	14.7288	67.9125	-1.34744	0.997787	-2.20504
ENSMUSG00000004285.12	17.9784	66.5558	-1.34299	0.997785	-1.8883
ENSMUSG00000039221.10	29.8422	131.575	-1.34251	0.997783	-2.14046
ENSMUSG00000043987.18	16.835	67.311	-1.34953	0.997776	-1.99938
ENSMUSG00000024566.10	96.9388	297.193	-1.34965	0.997775	-1.61625
ENSMUSG00000045333.15	31.9386	136.948	-1.34116	0.997774	-2.10026
ENSMUSG00000090015.8	44.0028	170.218	-1.33968	0.997761	-1.95171
ENSMUSG00000030662.10	173.716	464.838	-1.47023	0.99776	-1.42
ENSMUSG00000035632.16	65.5404	211.902	-1.33854	0.997748	-1.69294
ENSMUSG00000020918.14	24.0457	112.293	-1.33798	0.997741	-2.22342
ENSMUSG00000024924.14	575.988	1024.23	-1.33633	0.997717	-0.830427
ENSMUSG00000074794.10	952.115	1575.84	-1.33554	0.997705	-0.726916
ENSMUSG00000093445.7	31.1009	103.562	-1.33524	0.997699	-1.73546
ENSMUSG00000060538.14	9.33585	43.126	-1.33494	0.997694	-2.2077
ENSMUSG00000069114.8	57.9722	202.514	-1.33489	0.997693	-1.80459
ENSMUSG00000042662.16	30.4427	121.321	-1.33482	0.997692	-1.99467
ENSMUSG00000028680.14	44.9304	161.929	-1.35661	0.997685	-1.8496
ENSMUSG00000038861.14	30.0439	94.8147	-1.3568	0.997681	-1.65804
ENSMUSG00000015605.6	39.8041	129.193	-1.35754	0.997667	-1.69853
ENSMUSG00000030245.10	19.4368	73.2495	-1.35803	0.997657	-1.91403
ENSMUSG00000028243.5	28.18	127.76	-1.3587	0.997642	-2.18069
ENSMUSG00000041645.14	203.187	473.206	-1.33051	0.997598	-1.21966
ENSMUSG00000028646.16	84.0729	253.618	-1.32988	0.997582	-1.59295
ENSMUSG00000034075.10	64.6426	194.254	-1.36198	0.997564	-1.58739
ENSMUSG00000063800.5	33.9007	110.18	-1.32868	0.99755	-1.70047
ENSMUSG00000024217.10	28.3898	122.771	-1.32847	0.997544	-2.11252
ENSMUSG00000020758.15	67.6055	230.17	-1.36274	0.997544	-1.76748
ENSMUSG00000000568.15	228.142	591.367	-1.36367	0.997518	-1.37412
ENSMUSG00000038836.15	13.5726	73.3014	-1.36502	0.997479	-2.43315
ENSMUSG00000028668.5	69.3346	236.037	-1.36516	0.997475	-1.76737
ENSMUSG00000036257.15	434.391	886.704	-1.32549	0.997455	-1.02946
ENSMUSG00000041439.15	206.172	456.011	-1.32524	0.997447	-1.14522
ENSMUSG00000031434.15	13.4044	57.616	-1.36627	0.997441	-2.10376
ENSMUSG00000022553.16	26.6744	109.804	-1.32472	0.99743	-2.04141
ENSMUSG00000022887.9	21.7776	89.354	-1.3678	0.997392	-2.03669
ENSMUSG00000021660.14	122.532	359.747	-1.36812	0.997381	-1.55382
ENSMUSG00000059669.8	15.0653	66.4585	-1.32297	0.997371	-2.14122
ENSMUSG00000021913.8	63.1789	210.36	-1.36873	0.997361	-1.73535
ENSMUSG00000021573.15	1747.62	2578.79	-1.32212	0.997341	-0.561305
ENSMUSG00000026473.16	4475.68	5706.14	-1.36949	0.997335	-0.350407
ENSMUSG00000044340.7	2139.86	3476.44	-1.36974	0.997327	-0.700096
ENSMUSG00000024782.7	318.493	592.522	-1.31844	0.997201	-0.895608
ENSMUSG00000031987.6	124.279	388.617	-1.37353	0.997191	-1.64476
ENSMUSG00000024911.7	36.4886	127.645	-1.37387	0.997178	-1.80662
ENSMUSG00000030064.16	419.093	868.306	-1.31724	0.997153	-1.05093
ENSMUSG00000022538.20	20.2628	114.202	-1.37457	0.997152	-2.49468
ENSMUSG00000003585.13	21.164	100.625	-1.4594	0.997118	-2.24931
ENSMUSG00000029554.15	25.3434	96.0931	-1.45915	0.997103	-1.92282
ENSMUSG00000019647.16	964.382	1923.3	-1.45892	0.99709	-0.995903
ENSMUSG00000075289.5	23.0613	118.216	-1.45821	0.997048	-2.35788
ENSMUSG00000025016.11	550.814	997.212	-1.31439	0.997034	-0.856335
ENSMUSG00000004394.12	84.0525	226.318	-1.31427	0.997029	-1.42899
ENSMUSG00000001833.17	4106.21	5530.43	-1.45466	0.99684	-0.429584
ENSMUSG00000030701.17	3159.17	5479.15	-1.38357	0.996797	-0.794408
ENSMUSG00000032118.16	611.89	1331.89	-1.45385	0.996794	-1.12213
ENSMUSG00000028419.5	113.433	349.988	-1.38399	0.99678	-1.62547
ENSMUSG00000000532.11	28.5546	111.243	-1.30757	0.996728	-1.96192
ENSMUSG00000064325.4	392.322	889.924	-1.38614	0.996694	-1.18164
ENSMUSG00000038608.15	2857.1	4323.04	-1.30681	0.996692	-0.597493
ENSMUSG00000000838.17	206.826	458.67	-1.30569	0.996639	-1.14904
ENSMUSG00000029397.15	32.5415	139.653	-1.45104	0.996639	-2.10149
ENSMUSG00000033917.15	204.883	524.388	-1.38765	0.996635	-1.35583
ENSMUSG00000009090.17	52.0858	200.633	-1.30523	0.996617	-1.9456
ENSMUSG00000015176.11	65.3846	214.008	-1.1766	0.996578	-1.71064
ENSMUSG00000029141.16	27.2145	120.416	-1.38925	0.996572	-2.14557
ENSMUSG00000055538.7	588.311	1009.85	-1.17059	0.99657	-0.779487
ENSMUSG00000029587.16	29.3969	118.544	-1.17042	0.996568	-2.01169
ENSMUSG00000008035.12	114.449	393.078	-1.38947	0.996563	-1.78011
ENSMUSG00000017802.14	59.0165	208.96	-1.4496	0.996563	-1.82403
ENSMUSG00000022265.7	394.787	792.061	-1.17804	0.996562	-1.00454
ENSMUSG00000030452.16	45.5588	127.029	-1.17827	0.996559	-1.47935
ENSMUSG00000031578.5	19.6997	68.2787	-1.17945	0.996541	-1.79326
ENSMUSG00000018459.15	14.1053	66.3302	-1.44908	0.996536	-2.23343
ENSMUSG00000003810.13	94.5311	281.241	-1.16827	0.996532	-1.57295
ENSMUSG00000026858.18	20.7834	109.952	-1.17989	0.996532	-2.40336
ENSMUSG00000025555.14	192.284	458.7	-1.17999	0.99653	-1.25431
ENSMUSG00000028803.18	74.9074	183.547	-1.18034	0.996523	-1.29297
ENSMUSG00000029474.7	31.0098	102.495	-1.16771	0.996521	-1.72475
ENSMUSG00000030681.18	33.961	111.773	-1.16706	0.996505	-1.71862
ENSMUSG00000069237.8	41.0366	156.231	-1.44838	0.996501	-1.92869
ENSMUSG00000045071.14	216.373	469.763	-1.44836	0.9965	-1.11841
ENSMUSG00000039253.7	25.4326	89.6514	-1.18144	0.996499	-1.81765
ENSMUSG00000015202.13	83.5616	301.518	-1.18163	0.996495	-1.85133
ENSMUSG00000024287.8	79.6129	207.233	-1.16649	0.99649	-1.38018
ENSMUSG00000057101.8	29.6157	119.202	-1.39138	0.99649	-2.00898
ENSMUSG00000042613.9	45.1158	172.965	-1.18202	0.996486	-1.93878
ENSMUSG00000030685.5	140.19	370.906	-1.44791	0.996477	-1.40367
ENSMUSG00000026181.13	25.828	96.8383	-1.18258	0.996471	-1.90664
ENSMUSG00000037847.14	19.9454	63.9593	-1.1827	0.996468	-1.6811
ENSMUSG00000045404.16	22.7208	113.284	-1.44754	0.996459	-2.31786
ENSMUSG00000060904.14	33.2055	108.724	-1.39229	0.996456	-1.71118
ENSMUSG00000042404.16	38.2284	123.749	-1.18331	0.996451	-1.69469
ENSMUSG00000035953.14	77.454	204.675	-1.18376	0.996439	-1.40192
ENSMUSG00000095362.7	43.6942	136.432	-1.3933	0.996418	-1.64267
ENSMUSG00000057337.13	30.0811	92.7743	-1.3937	0.996403	-1.62487
ENSMUSG00000022051.15	493.23	859.722	-1.18509	0.996398	-0.801609
ENSMUSG00000048620.6	338.67	664.661	-1.18516	0.996396	-0.972736
ENSMUSG00000028093.15	29.3065	97.0754	-1.30031	0.996382	-1.72789
ENSMUSG00000041258.18	166.726	357.7	-1.18595	0.996369	-1.10127
ENSMUSG00000040268.17	1411	2587.1	-1.30002	0.996368	-0.874611
ENSMUSG00000047045.17	28.6022	113.884	-1.44494	0.996337	-1.99337
ENSMUSG00000016664.16	31.5578	115.705	-1.39572	0.996331	-1.87438
ENSMUSG00000025580.15	36.7022	138.975	-1.39618	0.996314	-1.92089
ENSMUSG00000010376.15	20.7747	103.464	-1.39624	0.996312	-2.31623
ENSMUSG00000038780.14	222.824	510.414	-1.18766	0.996308	-1.19577
ENSMUSG00000038482.11	55.018	210.49	-1.39687	0.99629	-1.93578
ENSMUSG00000007656.13	76.7852	257.528	-1.29826	0.996284	-1.74583
ENSMUSG00000028893.8	21.0925	70.616	-1.16079	0.996273	-1.74327
ENSMUSG00000023066.10	37.5198	127.477	-1.1886	0.996272	-1.76451
ENSMUSG00000026527.13	32.3482	108.713	-1.16057	0.996262	-1.74876
ENSMUSG00000026213.15	20.8313	93.0312	-1.443	0.996253	-2.15896
ENSMUSG00000039901.10	38.1198	109.627	-1.29755	0.99625	-1.524
ENSMUSG00000071660.10	26.5631	83.183	-1.29749	0.996247	-1.64687
ENSMUSG00000029120.10	534.722	1260.58	-1.18922	0.996247	-1.23723
ENSMUSG00000068923.14	3681.46	4992.52	-1.18926	0.996245	-0.439489
ENSMUSG00000090100.7	319.157	686.595	-1.18965	0.996229	-1.10519
ENSMUSG00000026821.16	693.899	1216.69	-1.3991	0.996216	-0.810164
ENSMUSG00000020811.16	382.137	759.646	-1.15847	0.99615	-0.991239
ENSMUSG00000038633.5	233.808	498.859	-1.19155	0.996148	-1.09331
ENSMUSG00000019579.13	17.0867	77.7736	-1.29538	0.996146	-2.18641
ENSMUSG00000038025.8	72.3646	230.558	-1.40186	0.99613	-1.67178
ENSMUSG00000033629.6	203.033	448.962	-1.15792	0.996118	-1.14488
ENSMUSG00000045917.17	12.8147	54.328	-1.40241	0.996114	-2.0839
ENSMUSG00000005615.15	92.8495	324.068	-1.43898	0.9961	-1.80333
ENSMUSG00000034371.9	10.9533	59.8834	-1.40306	0.996095	-2.45079
ENSMUSG00000028737.15	22.3567	123.607	-1.43802	0.996068	-2.46698
ENSMUSG00000035171.9	17.8147	65.0852	-1.29345	0.996054	-1.86926
ENSMUSG00000015149.14	1011.14	2240.88	-1.40484	0.996046	-1.14809
ENSMUSG00000018428.15	20.3035	66.1221	-1.19382	0.996045	-1.70341
ENSMUSG00000047246.7	17.6535	64.3274	-1.29326	0.996045	-1.86548
ENSMUSG00000030774.13	934.979	1482.26	-1.19386	0.996043	-0.664789
ENSMUSG00000027300.10	18.122	56.5416	-1.1566	0.996037	-1.64157
ENSMUSG00000045252.11	22.8955	88.9463	-1.43687	0.996031	-1.95787
ENSMUSG00000025050.8	19.1759	65.9597	-1.43687	0.996031	-1.78229
ENSMUSG00000037376.14	22.4297	117.642	-1.40543	0.996031	-2.39092
ENSMUSG00000055116.8	26.8592	88.9565	-1.19415	0.99603	-1.72768
ENSMUSG00000091512.5	22.9326	98.7457	-1.19479	0.996	-2.10632
ENSMUSG00000032212.10	361.342	643.401	-1.19538	0.995971	-0.832355
ENSMUSG00000028842.15	454.131	1048.24	-1.43467	0.99597	-1.20679
ENSMUSG00000020474.11	6.49509	64.7288	-1.2913	0.995953	-3.31699
ENSMUSG00000020402.11	112.119	299.383	-1.19578	0.995952	-1.41697
ENSMUSG00000079426.13	37.9718	135.612	-1.29123	0.995949	-1.83649
ENSMUSG00000030256.11	103.608	367.457	-1.40924	0.995942	-1.82643
ENSMUSG00000020132.10	282.438	788.84	-1.40941	0.995938	-1.4818
ENSMUSG00000026991.20	2222.19	4129.79	-1.40948	0.995937	-0.894086
ENSMUSG00000020473.13	21.4858	85.4251	-1.29062	0.99592	-1.99128
ENSMUSG00000032422.18	73.6539	283.936	-1.43207	0.995909	-1.94673
ENSMUSG00000031400.10	74.4434	238.475	-1.29003	0.995893	-1.67962
ENSMUSG00000030802.14	25.7156	104.931	-1.197	0.995892	-2.02872
ENSMUSG00000033918.16	20.901	80.6251	-1.28967	0.995876	-1.94766
ENSMUSG00000070327.14	79.8337	311.362	-1.19775	0.995855	-1.96352
ENSMUSG00000048022.11	721.009	1430.09	-1.42759	0.995838	-0.988019
ENSMUSG00000013523.13	3056.16	5197.11	-1.42741	0.995836	-0.765986
ENSMUSG00000040387.16	29.2034	86.8419	-1.42735	0.995835	-1.57226
ENSMUSG00000049670.9	20.1263	103.598	-1.19823	0.995831	-2.36385
ENSMUSG00000027551.15	12.8361	64.1892	-1.42669	0.995828	-2.32213
ENSMUSG00000022358.7	359.281	839.551	-1.42598	0.995822	-1.2245
ENSMUSG00000020189.15	122.667	362.298	-1.42597	0.995822	-1.56243
ENSMUSG00000038412.8	12.7466	83.0838	-1.4257	0.99582	-2.70445
ENSMUSG00000008859.8	106.641	278.68	-1.42564	0.99582	-1.38585
ENSMUSG00000062078.15	21741	27888.6	-1.41967	0.995809	-0.359259
ENSMUSG00000029430.13	104.443	318.699	-1.42007	0.995808	-1.60948
ENSMUSG00000042271.13	107.257	298.062	-1.42325	0.995807	-1.47454
ENSMUSG00000038668.14	876.011	1884.76	-1.42325	0.995807	-1.10536
ENSMUSG00000030616.16	928.413	1954.34	-1.42252	0.995806	-1.07384
ENSMUSG00000039285.12	86.007	237.643	-1.42112	0.995805	-1.46627
ENSMUSG00000041096.13	80.1827	243.067	-1.19876	0.995804	-1.59999
ENSMUSG00000096210.2	110.673	324.314	-1.2881	0.995804	-1.5511
ENSMUSG00000002010.17	78.8771	209.535	-1.28784	0.995792	-1.40951
ENSMUSG00000026442.14	6768.67	12288.8	-1.28754	0.995778	-0.860397
ENSMUSG00000019818.15	267.147	649.12	-1.28738	0.995771	-1.28085
ENSMUSG00000024597.11	3332.66	4957.93	-1.28723	0.995764	-0.573066
ENSMUSG00000031605.8	1036.18	1766.51	-1.28652	0.995732	-0.769631
ENSMUSG00000032834.11	12.7279	59.3987	-1.28635	0.995724	-2.22243
ENSMUSG00000029832.16	75.3394	191.477	-1.28609	0.995712	-1.3457
ENSMUSG00000058258.14	258.234	669.33	-1.28597	0.995707	-1.37404
ENSMUSG00000006651.8	3147.94	4357.88	-1.15185	0.9957	-0.46922
ENSMUSG00000024048.15	35.1671	134.394	-1.28486	0.995657	-1.93417
ENSMUSG00000063888.7	48.3912	164.057	-1.28461	0.995646	-1.76138
ENSMUSG00000049807.16	1400.98	2204.75	-1.151	0.995632	-0.654177
ENSMUSG00000022307.16	493.496	1017.87	-1.15071	0.995609	-1.04445
ENSMUSG00000032913.13	114.692	292.922	-1.20278	0.9956	-1.35275
ENSMUSG00000035266.16	18.9509	65.2044	-1.1504	0.995584	-1.78271
ENSMUSG00000026617.16	76.7064	198.413	-1.20315	0.995581	-1.37109
ENSMUSG00000006403.13	807.324	1430.19	-1.15026	0.995573	-0.824983
ENSMUSG00000026280.17	41.4028	133.233	-1.20344	0.995566	-1.68615
ENSMUSG00000020329.12	22.2362	82.0481	-1.20468	0.995503	-1.88356
ENSMUSG00000038335.13	20.7062	70.988	-1.28131	0.995501	-1.77751
ENSMUSG00000000149.10	945.28	1609.87	-1.14927	0.995489	-0.768129
ENSMUSG00000019907.10	534.214	936.557	-1.2799	0.995441	-0.80995
ENSMUSG00000051427.14	18.9982	85.0531	-1.27952	0.995425	-2.1625
ENSMUSG00000022305.13	61.2925	177.577	-1.20654	0.99541	-1.53467
ENSMUSG00000009828.15	448.656	914.976	-1.20667	0.995404	-1.02812
ENSMUSG00000032648.14	27.3334	92.7202	-1.27889	0.995399	-1.76222
ENSMUSG00000032324.11	534.406	975.158	-1.27863	0.995388	-0.8677
ENSMUSG00000041037.8	33.8563	165.03	-1.27857	0.995386	-2.28523
ENSMUSG00000058454.15	79.3841	223.508	-1.27821	0.995371	-1.49341
ENSMUSG00000024312.10	9.63288	32.5534	-1.14774	0.995357	-1.75677
ENSMUSG00000033009.15	28.5503	77.8742	-1.20779	0.995349	-1.44764
ENSMUSG00000022702.16	59.0228	175.811	-1.20793	0.995342	-1.57468
ENSMUSG00000049612.10	718.976	1341.49	-1.20812	0.995333	-0.899825
ENSMUSG00000047787.8	37.2404	108.015	-1.20856	0.995311	-1.53629
ENSMUSG00000116340.1	15.8215	78.6215	-1.14719	0.995308	-2.31304
ENSMUSG00000044876.15	19.3793	65.4403	-1.20933	0.995274	-1.75566
ENSMUSG00000020190.13	25.8113	104.067	-1.1461	0.99521	-2.01144
ENSMUSG00000008855.17	357.829	773.797	-1.2112	0.995186	-1.11268
ENSMUSG00000036989.16	90.2533	232.604	-1.14558	0.995161	-1.36582
ENSMUSG00000037234.17	997.214	1589.92	-1.21174	0.995161	-0.672983
ENSMUSG00000028330.8	86.692	225.184	-1.14555	0.995159	-1.37714
ENSMUSG00000027522.15	54.76	174.459	-1.27216	0.995133	-1.67169
ENSMUSG00000028525.16	1205.04	1772.1	-1.21284	0.995112	-0.556377
ENSMUSG00000059495.14	965.219	1520.5	-1.213	0.995104	-0.655616
ENSMUSG00000007589.9	35.9294	99.9316	-1.14476	0.995085	-1.47577
ENSMUSG00000027895.10	14.9288	67.5821	-1.14451	0.995062	-2.17854
ENSMUSG00000058298.10	34.1588	126.56	-1.14451	0.995062	-1.8895
ENSMUSG00000022558.16	56.395	194.524	-1.21411	0.995056	-1.78631
ENSMUSG00000036299.5	55.4788	161.28	-1.14423	0.995035	-1.53956
ENSMUSG00000057880.12	600.18	1265.49	-1.21554	0.994995	-1.07623
ENSMUSG00000024120.12	88.333	255.984	-1.2682	0.994992	-1.53503
ENSMUSG00000021986.9	460.203	1017.09	-1.21566	0.994991	-1.1441
ENSMUSG00000036046.14	1045.44	1760.96	-1.26688	0.994947	-0.752248
ENSMUSG00000092416.2	17.0323	61.086	-1.26687	0.994947	-1.84257
ENSMUSG00000021703.9	1893.4	3112.03	-1.14329	0.994946	-0.716872
ENSMUSG00000052751.16	32.7754	104.785	-1.2174	0.994921	-1.67674
ENSMUSG00000040289.8	56.182	184.816	-1.266	0.994918	-1.71791
ENSMUSG00000025499.18	13.3619	77.3762	-1.21895	0.994862	-2.53376
ENSMUSG00000026803.17	43.3168	134.244	-1.21927	0.994851	-1.63186
ENSMUSG00000024140.10	710.605	1233.08	-1.21976	0.994833	-0.795146
ENSMUSG00000034648.9	626.046	1158.56	-1.26246	0.99481	-0.887988
ENSMUSG00000021615.13	29.2227	107.922	-1.26229	0.994805	-1.88482
ENSMUSG00000036880.10	15.391	60.4392	-1.14166	0.994789	-1.9734
ENSMUSG00000025503.5	194.42	466.418	-1.22173	0.994767	-1.26245
ENSMUSG00000047648.13	46.9339	189.114	-1.26074	0.994762	-2.01056
ENSMUSG00000049550.17	115.207	323.768	-1.22189	0.994761	-1.49074
ENSMUSG00000059278.9	9.08723	40.1626	-1.22195	0.99476	-2.14394
ENSMUSG00000024163.17	490.862	929.04	-1.2606	0.994758	-0.920425
ENSMUSG00000045667.14	19.0042	64.483	-1.25966	0.994733	-1.7626
ENSMUSG00000069744.7	15.5695	78.3862	-1.25944	0.994727	-2.33188
ENSMUSG00000062098.11	115.512	347.57	-1.22404	0.994696	-1.58927
ENSMUSG00000030161.8	117.077	317.249	-1.22421	0.994692	-1.43815
ENSMUSG00000055717.13	949.242	1653.82	-1.25727	0.994674	-0.800955
ENSMUSG00000037907.16	25.4763	113.289	-1.2555	0.994634	-2.15278
ENSMUSG00000035969.15	199.245	383.686	-1.13965	0.994592	-0.945383
ENSMUSG00000044894.14	21.3349	68.5618	-1.13957	0.994583	-1.68419
ENSMUSG00000028572.13	24.3515	116.544	-1.22947	0.994567	-2.25879
ENSMUSG00000075254.12	146.551	410.381	-1.22953	0.994566	-1.48556
ENSMUSG00000091712.2	258.05	606.21	-1.25088	0.994548	-1.23217
ENSMUSG00000026229.17	180.972	442.597	-1.13907	0.994534	-1.29022
ENSMUSG00000032497.19	33.0905	105.937	-1.23334	0.994507	-1.67872
ENSMUSG00000031708.17	240.596	508.977	-1.13877	0.994504	-1.08099
ENSMUSG00000029290.12	142.234	333.293	-1.23438	0.994495	-1.22853
ENSMUSG00000022664.11	151.095	361.796	-1.23463	0.994492	-1.25973
ENSMUSG00000093674.7	643.079	1414.36	-1.24605	0.994489	-1.13708
ENSMUSG00000019971.10	76.5186	257.013	-1.23573	0.994483	-1.74796
ENSMUSG00000028399.18	5625.36	8520.1	-1.13853	0.99448	-0.598926
ENSMUSG00000078652.9	31.7115	140.717	-1.23627	0.994479	-2.14971
ENSMUSG00000116014.1	6.43019	30.9485	-1.24415	0.994475	-2.26694
ENSMUSG00000019782.10	69.8549	233.878	-1.23752	0.994471	-1.74332
ENSMUSG00000026112.7	63.1783	266.899	-1.23775	0.99447	-2.0788
ENSMUSG00000050751.14	23.7718	126.41	-1.24243	0.994467	-2.41079
ENSMUSG00000046861.9	25.9439	83.7801	-1.23861	0.994467	-1.69121
ENSMUSG00000063297.7	1407.93	2005.48	-1.13621	0.99425	-0.510372
ENSMUSG00000046157.13	9.18898	39.2445	-1.13558	0.994189	-2.09451
ENSMUSG00000038774.9	290.844	559.687	-1.13523	0.994154	-0.944373
ENSMUSG00000047412.16	172.275	353.757	-1.13372	0.994006	-1.03804
ENSMUSG00000078350.11	13.8604	58.9593	-1.13168	0.993809	-2.08875
ENSMUSG00000001630.13	31.6044	99.2957	-1.13124	0.993767	-1.65161
ENSMUSG00000060938.14	551.364	1199.07	-1.12813	0.993479	-1.12084
ENSMUSG00000057637.13	233.75	461.419	-1.12374	0.993106	-0.981114
ENSMUSG00000074918.4	24.3587	75.3652	-1.1225	0.993008	-1.62946
ENSMUSG00000023723.17	10.1527	43.8428	-1.12179	0.992954	-2.11048
ENSMUSG00000004591.16	196.805	418.332	-1.12131	0.992919	-1.08788
ENSMUSG00000046516.10	20.227	88.7053	-1.11929	0.992776	-2.13274
ENSMUSG00000037503.12	286.051	539.587	-1.11605	0.992573	-0.915583
ENSMUSG00000028889.17	8.01003	40.2625	-1.11594	0.992567	-2.32956
ENSMUSG00000020260.9	17.1136	70.8939	-1.1129	0.992406	-2.05052
ENSMUSG00000047731.17	86.6468	226.435	-1.11244	0.992384	-1.38588
ENSMUSG00000028412.17	1829.36	2704.01	-1.11213	0.99237	-0.563759
ENSMUSG00000029213.11	38.097	116.464	-1.10976	0.99227	-1.61213
ENSMUSG00000021670.14	301.613	605.406	-1.10941	0.992256	-1.0052
ENSMUSG00000035877.17	233.411	508.066	-1.10902	0.992242	-1.12214
ENSMUSG00000051615.14	381.11	899.017	-1.10753	0.992191	-1.23814
ENSMUSG00000043716.13	483.212	899.018	-1.10639	0.992155	-0.895692
ENSMUSG00000052783.16	222.149	460.664	-1.10339	0.992078	-1.05219
ENSMUSG00000061559.15	14.6789	37.1739	-1.10231	0.992055	-1.34055
ENSMUSG00000025375.15	1968.55	2721.51	-1.10174	0.992044	-0.467269
ENSMUSG00000027942.17	46.2801	126.586	-1.10158	0.992041	-1.45165
ENSMUSG00000018166.8	350.918	704.423	-1.10129	0.992036	-1.00531
ENSMUSG00000025217.15	97.7203	217.291	-1.10127	0.992036	-1.15289
ENSMUSG00000089872.10	81.3241	253.532	-1.10057	0.992024	-1.64041
ENSMUSG00000031983.7	455.906	859.255	-1.10054	0.992023	-0.91435
ENSMUSG00000043154.15	1072.9	1698.83	-1.0995	0.992007	-0.66302
ENSMUSG00000035936.6	147.242	387.083	-1.09894	0.991999	-1.39445
ENSMUSG00000033365.14	263.631	614.25	-1.09798	0.991987	-1.2203
ENSMUSG00000024077.15	1370.21	2090.55	-1.09776	0.991984	-0.60948
ENSMUSG00000028657.14	116.297	259.133	-1.09705	0.991976	-1.15588
ENSMUSG00000073639.6	167.807	344.829	-1.09695	0.991975	-1.03908
ENSMUSG00000030246.12	251.063	477.78	-1.09634	0.991968	-0.928298
ENSMUSG00000040026.8	603.551	940.911	-1.09606	0.991965	-0.640583
ENSMUSG00000020248.18	29.6434	73.3863	-1.09598	0.991964	-1.3078
ENSMUSG00000069601.14	5425.84	9733.78	-1.09593	0.991964	-0.843155
ENSMUSG00000112101.1	174.868	424.979	-1.09572	0.991962	-1.28113
ENSMUSG00000083282.3	75.8523	177.389	-1.0953	0.991958	-1.22565
ENSMUSG00000052544.9	114.046	282.302	-1.09524	0.991957	-1.30762
ENSMUSG00000029020.13	113.28	313.326	-1.0947	0.991952	-1.46778
ENSMUSG00000039086.9	29.1788	81.5093	-1.09362	0.991943	-1.48204
ENSMUSG00000038143.16	841.903	1329.37	-1.09355	0.991943	-0.659011
ENSMUSG00000006315.9	25.1027	84.6116	-1.09325	0.99194	-1.75302
ENSMUSG00000023977.15	370.948	663.255	-1.09286	0.991937	-0.838344
ENSMUSG00000002014.12	21.473	81.5428	-1.09263	0.991936	-1.92503
ENSMUSG00000058070.14	329.605	638.573	-1.09021	0.991918	-0.954115
ENSMUSG00000085793.2	15.6307	47.6612	-1.08914	0.991911	-1.60843
ENSMUSG00000003346.14	54.9627	170.886	-1.0875	0.991899	-1.63651
ENSMUSG00000034480.18	118.723	271.336	-1.08402	0.99187	-1.19248
ENSMUSG00000020124.10	213.947	473.564	-1.08276	0.991857	-1.14631
ENSMUSG00000021690.10	555.04	939.441	-1.08245	0.991853	-0.759209
ENSMUSG00000027502.11	34.7738	88.9425	-1.07924	0.99181	-1.35487
ENSMUSG00000024070.15	438.141	830.792	-1.07705	0.991772	-0.923091
ENSMUSG00000002274.13	94.6324	252.021	-1.07575	0.991747	-1.41314
ENSMUSG00000039988.14	208.347	410.043	-1.07474	0.991724	-0.976788
ENSMUSG00000037071.3	2512.41	3915.53	-1.0747	0.991724	-0.640139
ENSMUSG00000031775.5	458.464	805.13	-1.07434	0.991715	-0.812413
ENSMUSG00000029211.11	32.8777	133.977	-1.07063	0.991615	-2.02681
ENSMUSG00000020032.14	60.8409	151.125	-1.06959	0.991583	-1.31263
ENSMUSG00000071074.9	37.7456	117.173	-1.06903	0.991565	-1.63425
ENSMUSG00000040021.13	262.985	500.657	-1.0687	0.991553	-0.928843
ENSMUSG00000032531.15	300.025	559.782	-1.06846	0.991545	-0.899782
ENSMUSG00000040128.9	414.973	706.705	-1.06788	0.991525	-0.76809
ENSMUSG00000027312.14	836.71	1422.4	-1.06568	0.991442	-0.765532
ENSMUSG00000036932.14	22.9893	85.3951	-1.06466	0.991402	-1.89319
ENSMUSG00000028059.16	617.477	941.897	-1.06365	0.991359	-0.609185
ENSMUSG00000013698.12	1123.66	1851.27	-1.06186	0.991279	-0.720313
ENSMUSG00000076435.3	20.6492	76.0444	-1.06175	0.991274	-1.88076
ENSMUSG00000034158.9	1917.08	2606.12	-1.06044	0.991213	-0.44299
ENSMUSG00000026385.16	206.274	435.977	-1.06022	0.991202	-1.07969
ENSMUSG00000026319.13	299.086	580.264	-1.05928	0.991156	-0.956151
ENSMUSG00000001280.13	215.89	450.136	-1.05884	0.991134	-1.06006
ENSMUSG00000015305.6	980.192	1530.21	-1.05817	0.9911	-0.642597
ENSMUSG00000026944.18	4043.56	5488.62	-1.05645	0.99101	-0.440817
ENSMUSG00000018750.14	109.68	263.657	-1.05494	0.990928	-1.26536
ENSMUSG00000001750.16	39.3694	139.486	-1.0527	0.990803	-1.82497
ENSMUSG00000040548.16	190.582	365.92	-1.05259	0.990797	-0.941117
ENSMUSG00000111163.1	56.6995	135.564	-1.05241	0.990787	-1.25757
ENSMUSG00000003970.9	237.517	502.784	-1.05124	0.99072	-1.08191
ENSMUSG00000029436.9	21.1334	87.4811	-1.05123	0.990719	-2.04944
ENSMUSG00000023932.9	155.242	309.899	-1.04727	0.990487	-0.997275
ENSMUSG00000006906.10	99.1528	219.74	-1.04726	0.990486	-1.14807
ENSMUSG00000032244.9	216.57	424.522	-1.04617	0.990422	-0.971008
ENSMUSG00000022141.7	654.672	1113.35	-1.04596	0.990409	-0.766064
ENSMUSG00000038084.16	259.298	485.888	-1.04564	0.99039	-0.906014
ENSMUSG00000000247.11	42.5772	109.646	-1.04395	0.99029	-1.3647
ENSMUSG00000052698.15	177.263	389.168	-1.04316	0.990243	-1.1345
ENSMUSG00000058546.8	685.192	1312.62	-1.0422	0.990187	-0.937872
ENSMUSG00000025584.17	601.132	999.621	-1.03635	0.989855	-0.7337
ENSMUSG00000030738.11	330.925	599.488	-1.03517	0.989791	-0.857226
ENSMUSG00000048537.16	2511.37	3639.31	-1.03391	0.989725	-0.535188
ENSMUSG00000022048.8	2939.27	3608.26	-1.03329	0.989693	-0.295844
ENSMUSG00000020777.16	422.887	731.814	-1.03223	0.989639	-0.791205
ENSMUSG00000032479.15	2805.8	4402.38	-1.03109	0.989584	-0.64987
ENSMUSG00000025321.14	1213.9	1811.78	-1.02939	0.989504	-0.577756
ENSMUSG00000022075.7	45.4016	116.476	-1.02925	0.989498	-1.35922
ENSMUSG00000001323.17	94.8349	279.495	-1.02894	0.989484	-1.55933
ENSMUSG00000033059.7	397.471	662.736	-1.02879	0.989477	-0.737585
ENSMUSG00000051695.6	149.916	343.942	-1.0276	0.989425	-1.19802
ENSMUSG00000020486.19	1662.99	2311	-1.02718	0.989407	-0.474739
ENSMUSG00000030168.13	178.379	388.722	-1.02714	0.989405	-1.12379
ENSMUSG00000018451.7	19.9222	106.514	-1.02682	0.989391	-2.41859
ENSMUSG00000004661.15	16.8338	52.8197	-1.02213	0.989215	-1.64971
ENSMUSG00000097487.7	8.60207	28.7936	-1.02151	0.989194	-1.74299
ENSMUSG00000028127.10	277.848	504.862	-1.02097	0.989177	-0.861592
ENSMUSG00000006019.15	16.2658	45.8601	-0.966928	0.989151	-1.4954
ENSMUSG00000041298.15	329.156	653.154	-0.964858	0.989151	-0.988651
ENSMUSG00000028423.15	158.666	326.512	-0.964065	0.98915	-1.04114
ENSMUSG00000030393.8	15.4021	53.209	-0.968017	0.989149	-1.78854
ENSMUSG00000032966.14	394.592	869.341	-0.968166	0.989149	-1.13956
ENSMUSG00000025812.18	190.853	382.952	-0.963708	0.989149	-1.0047
ENSMUSG00000037242.8	1386.53	2169.88	-0.963011	0.989148	-0.646139
ENSMUSG00000073888.13	11.5059	35.637	-0.969066	0.989147	-1.631
ENSMUSG00000031446.14	244.416	486.077	-0.962465	0.989146	-0.991847
ENSMUSG00000036622.15	98.8492	210.452	-0.969747	0.989145	-1.09019
ENSMUSG00000045752.13	64.7301	180.82	-0.961069	0.98914	-1.48204
ENSMUSG00000044501.17	18.0901	52.4533	-0.971801	0.989136	-1.53583
ENSMUSG00000039157.12	792.036	1288.38	-1.01956	0.989135	-0.701927
ENSMUSG00000033065.14	135.179	289.633	-0.95928	0.98913	-1.09936
ENSMUSG00000036155.13	367.003	591.967	-0.958843	0.989128	-0.689724
ENSMUSG00000032562.13	385.797	669.578	-1.01924	0.989126	-0.79541
ENSMUSG00000026933.17	204.931	401.88	-0.958134	0.989123	-0.971625
ENSMUSG00000048240.14	108.732	302.302	-0.974227	0.989122	-1.47521
ENSMUSG00000021097.15	1559	2323.98	-0.9577	0.989119	-0.575979
ENSMUSG00000027663.12	304.767	547.066	-0.957291	0.989116	-0.844008
ENSMUSG00000028927.6	354.184	695.954	-0.975623	0.989112	-0.974494
ENSMUSG00000049076.12	1124.76	1600.5	-0.97689	0.989101	-0.508902
ENSMUSG00000039210.16	66.0589	163.655	-0.978113	0.989091	-1.30884
ENSMUSG00000090946.3	23.3937	68.7351	-0.978253	0.98909	-1.55493
ENSMUSG00000060240.12	28.7139	108.472	-0.954149	0.989086	-1.91751
ENSMUSG00000052748.14	116.079	271.986	-0.978785	0.989085	-1.22843
ENSMUSG00000066760.12	245.888	435.144	-0.953386	0.989077	-0.823491
ENSMUSG00000034854.8	12.895	30.719	-0.981127	0.989062	-1.25232
ENSMUSG00000030556.13	105.35	219.495	-0.982049	0.989052	-1.05899
ENSMUSG00000021972.14	270.954	469.006	-0.950946	0.989046	-0.791561
ENSMUSG00000027742.13	76.537	176.744	-0.983217	0.98904	-1.20743
ENSMUSG00000027984.8	68.8002	168.747	-0.984087	0.989031	-1.29438
ENSMUSG00000019996.17	1537.89	2213.42	-0.984254	0.989029	-0.525326
ENSMUSG00000006728.12	44.6143	104.355	-0.949476	0.989024	-1.22592
ENSMUSG00000028385.14	540.839	939.295	-0.948273	0.989006	-0.796381
ENSMUSG00000021708.17	18.43	89.3227	-0.987136	0.988998	-2.27697
ENSMUSG00000073079.6	259.952	514.967	-0.947485	0.988993	-0.986238
ENSMUSG00000061436.15	2953.99	4350.94	-0.988162	0.988987	-0.558663
ENSMUSG00000033904.16	2096.21	2919.22	-0.94677	0.988981	-0.477796
ENSMUSG00000007721.6	40.8097	116.072	-0.989195	0.988976	-1.50803
ENSMUSG00000055945.8	875.923	1520.97	-0.989938	0.988969	-0.79612
ENSMUSG00000030269.14	28.0522	106.575	-1.01116	0.988956	-1.92569
ENSMUSG00000111946.1	11.4805	67.5627	-1.01082	0.988952	-2.55704
ENSMUSG00000022103.10	17.2012	77.9155	-0.991932	0.98895	-2.1794
ENSMUSG00000032386.15	133.205	270.918	-0.945015	0.988949	-1.0242
ENSMUSG00000025410.10	201.559	393.63	-0.944553	0.98894	-0.965637
ENSMUSG00000057134.6	604.139	1003.42	-0.994129	0.988931	-0.731978
ENSMUSG00000036395.15	32.7256	85.594	-0.943911	0.988928	-1.38709
ENSMUSG00000063077.15	7480.95	9793.26	-0.943841	0.988927	-0.388567
ENSMUSG00000020230.15	21.5854	65.0932	-0.994958	0.988925	-1.59245
ENSMUSG00000036473.16	51.0331	162.943	-0.995111	0.988924	-1.67486
ENSMUSG00000036023.6	29.8454	77.5655	-0.943452	0.988919	-1.3779
ENSMUSG00000022044.14	461.988	812.811	-0.995873	0.988919	-0.815065
ENSMUSG00000031918.16	374.003	651.733	-0.943011	0.98891	-0.801229
ENSMUSG00000043923.8	24.3594	90.1847	-1.00559	0.988905	-1.8884
ENSMUSG00000029263.15	21.6043	70.0216	-0.99913	0.988902	-1.69648
ENSMUSG00000020516.15	106.773	277.8	-0.999207	0.988902	-1.3795
ENSMUSG00000027822.16	60.099	144.797	-1.00291	0.988898	-1.26862
ENSMUSG00000021188.14	429.471	697.422	-1.00272	0.988897	-0.699469
ENSMUSG00000030432.12	241.534	535.313	-1.00158	0.988897	-1.14816
ENSMUSG00000060126.14	1486.44	2180.07	-1.0022	0.988897	-0.552516
ENSMUSG00000034951.10	70.3478	164.666	-0.941029	0.988869	-1.22696
ENSMUSG00000021179.8	31.7984	88.3479	-0.940202	0.988851	-1.47424
ENSMUSG00000117310.2	1302.47	1918.99	-0.939521	0.988836	-0.559095
ENSMUSG00000024978.11	350.901	631.259	-0.938716	0.988818	-0.847166
ENSMUSG00000024958.13	34.1864	99.3318	-0.938327	0.988809	-1.53883
ENSMUSG00000019726.12	184.001	365.782	-0.938185	0.988806	-0.99127
ENSMUSG00000024777.10	60.5232	153.69	-0.936327	0.988761	-1.34447
ENSMUSG00000027466.15	82.2369	169.31	-0.936159	0.988757	-1.04181
ENSMUSG00000029769.16	29.0539	81.8715	-0.936059	0.988754	-1.49463
ENSMUSG00000046160.6	1244.71	1920.86	-0.933667	0.988693	-0.625947
ENSMUSG00000024812.11	460.295	841.386	-0.931588	0.988637	-0.870209
ENSMUSG00000001229.9	74.1199	177.912	-0.930917	0.988618	-1.26323
ENSMUSG00000018899.16	30.2127	96.0307	-0.93052	0.988607	-1.66834
ENSMUSG00000031431.13	231.98	434.623	-0.928758	0.988556	-0.905766
ENSMUSG00000020949.9	80.8574	192.317	-0.928403	0.988545	-1.25003
ENSMUSG00000087403.9	51.9715	114.753	-0.928043	0.988534	-1.14274
ENSMUSG00000041205.8	388.691	715.828	-0.926548	0.988488	-0.88099
ENSMUSG00000037149.10	179.603	362.768	-0.926433	0.988485	-1.01424
ENSMUSG00000038587.10	103.761	213.626	-0.92566	0.98846	-1.04183
ENSMUSG00000022438.6	349.575	642.555	-0.924862	0.988434	-0.878219
ENSMUSG00000020864.13	581.138	1012.2	-0.924068	0.988408	-0.800543
ENSMUSG00000111855.1	17.7168	54.9638	-0.92384	0.988401	-1.63337
ENSMUSG00000090626.9	47.1983	112.118	-0.923764	0.988398	-1.24821
ENSMUSG00000039849.6	94.647	243.864	-0.923291	0.988382	-1.36545
ENSMUSG00000021451.16	1118.1	1648.37	-0.92233	0.988349	-0.559995
ENSMUSG00000040209.12	394.011	652.267	-0.922096	0.988341	-0.727227
ENSMUSG00000029309.7	7109.93	9051.08	-0.920808	0.988295	-0.348254
ENSMUSG00000027104.18	406.47	638.433	-0.919641	0.988252	-0.651388
ENSMUSG00000045180.13	362.292	637.273	-0.919232	0.988237	-0.814758
ENSMUSG00000025651.14	162.731	319.316	-0.918518	0.98821	-0.972498
ENSMUSG00000032288.9	12.2521	34.0897	-0.91845	0.988207	-1.47631
ENSMUSG00000090841.2	152.409	292.845	-0.918382	0.988204	-0.942191
ENSMUSG00000032328.12	1005.9	1416.29	-0.918223	0.988198	-0.49363
ENSMUSG00000027425.18	45.1465	116.025	-0.916567	0.988133	-1.36175
ENSMUSG00000024646.14	113.112	243.592	-0.916387	0.988126	-1.10672
ENSMUSG00000059208.15	326.061	603.988	-0.915292	0.988081	-0.889376
ENSMUSG00000024851.14	102.63	253.425	-0.914822	0.988061	-1.3041
ENSMUSG00000047603.9	13.0326	37.4664	-0.910522	0.987871	-1.52347
ENSMUSG00000025158.7	40.981	95.8915	-0.910391	0.987864	-1.22645
ENSMUSG00000022770.17	1173.3	1707.36	-0.909169	0.987806	-0.541194
ENSMUSG00000024423.6	271.024	500.777	-0.907222	0.98771	-0.885748
ENSMUSG00000036503.13	1512.3	2095.83	-0.906803	0.987689	-0.470774
ENSMUSG00000010277.7	798.595	1267.1	-0.905999	0.987648	-0.665992
ENSMUSG00000039159.16	407.316	668.682	-0.90546	0.98762	-0.715173
ENSMUSG00000037742.14	6185.91	7827.26	-0.900245	0.987331	-0.339521
ENSMUSG00000004364.14	472.176	773.85	-0.899412	0.987282	-0.712729
ENSMUSG00000015341.17	633.528	975.669	-0.898744	0.987242	-0.622983
ENSMUSG00000036427.5	328.4	585	-0.897793	0.987185	-0.832982
ENSMUSG00000018774.13	19.9715	47.5965	-0.896284	0.987092	-1.25291
ENSMUSG00000028745.18	112.665	237.953	-0.896177	0.987085	-1.07864
ENSMUSG00000031667.16	394.086	709.472	-0.895928	0.98707	-0.848234
ENSMUSG00000064354.1	19163.9	32695.9	-0.894696	0.986992	-0.770722
ENSMUSG00000028619.15	32.0442	82.8654	-0.894408	0.986974	-1.37071
ENSMUSG00000020745.15	1718.04	2240.03	-0.892836	0.986872	-0.382751
ENSMUSG00000007570.16	21.7564	62.9448	-0.892235	0.986833	-1.53265
ENSMUSG00000090125.3	41.0593	103.594	-0.891953	0.986814	-1.33516
ENSMUSG00000056966.7	1261.27	1802.64	-0.891712	0.986799	-0.515234
ENSMUSG00000058392.13	18.571	56.3205	-0.890141	0.986694	-1.60061
ENSMUSG00000053398.11	210.374	372.783	-0.887968	0.986547	-0.825379
ENSMUSG00000068740.13	258.52	516.52	-0.885897	0.986404	-0.998551
ENSMUSG00000117357.1	8.83415	32.8002	-0.885333	0.986365	-1.89254
ENSMUSG00000024172.10	44.1083	119.312	-0.885158	0.986353	-1.43561
ENSMUSG00000034731.11	65.0895	195.623	-0.88163	0.986106	-1.58758
ENSMUSG00000029621.14	322.278	592.264	-0.880083	0.985998	-0.877933
ENSMUSG00000038563.14	56.7633	119.242	-0.878771	0.985905	-1.07086
ENSMUSG00000056342.16	1165.17	1544.29	-0.87861	0.985894	-0.406408
ENSMUSG00000025616.14	168.066	310.975	-0.878408	0.98588	-0.88777
ENSMUSG00000025224.16	320.709	554.253	-0.877254	0.985799	-0.789279
ENSMUSG00000017734.15	878.459	1315.07	-0.877162	0.985792	-0.582096
ENSMUSG00000021824.13	250.152	462.591	-0.877025	0.985783	-0.886931
ENSMUSG00000026109.14	1416.1	1984.96	-0.876854	0.985771	-0.487181
ENSMUSG00000089715.12	307.471	576	-0.876847	0.98577	-0.905618
ENSMUSG00000028081.6	550.188	950.05	-0.875635	0.985686	-0.788077
ENSMUSG00000000631.20	938.556	1381.39	-0.871036	0.985368	-0.557607
ENSMUSG00000040407.18	1032.62	1513.86	-0.87071	0.985346	-0.551921
ENSMUSG00000031209.14	38.7371	164.923	-0.870078	0.985303	-2.09001
ENSMUSG00000015748.13	17.1692	42.6606	-0.868695	0.985211	-1.31308
ENSMUSG00000020029.6	1041.56	1664.36	-0.867923	0.985159	-0.676228
ENSMUSG00000021114.9	152.758	316.379	-0.867781	0.98515	-1.05041
ENSMUSG00000057156.10	16.3062	42.0659	-0.867409	0.985125	-1.36723
ENSMUSG00000030203.17	355.977	592.789	-0.864824	0.984957	-0.735735
ENSMUSG00000109901.2	189.656	360.893	-0.864478	0.984935	-0.928184
ENSMUSG00000035441.14	443.42	727.309	-0.862913	0.984837	-0.713895
ENSMUSG00000003161.15	111.128	239.753	-0.861726	0.984763	-1.10932
ENSMUSG00000030045.10	29.137	66.5186	-0.861145	0.984727	-1.1909
ENSMUSG00000028700.14	58.9032	114.991	-0.860863	0.98471	-0.965104
ENSMUSG00000061024.8	122.994	258.122	-0.860642	0.984697	-1.06946
ENSMUSG00000032399.8	977.694	1359.35	-0.860507	0.984689	-0.475464
ENSMUSG00000061451.13	604.036	947.53	-0.856891	0.984476	-0.649536
ENSMUSG00000034543.15	65.5032	158.374	-0.8563	0.984443	-1.2737
ENSMUSG00000031072.14	17.603	43.6225	-0.853253	0.984275	-1.30925
ENSMUSG00000075383.4	46.6997	120.602	-0.853198	0.984272	-1.36876
ENSMUSG00000041351.16	219.442	412.701	-0.85315	0.98427	-0.911258
ENSMUSG00000016239.11	61.0365	148.179	-0.851377	0.984176	-1.2796
ENSMUSG00000034430.16	110.731	207.413	-0.85109	0.984162	-0.905448
ENSMUSG00000032580.12	635.654	1052.92	-0.850371	0.984125	-0.728079
ENSMUSG00000000711.3	168.398	327.121	-0.848087	0.984011	-0.957947
ENSMUSG00000030120.14	256.341	482.255	-0.847901	0.984002	-0.911732
ENSMUSG00000051234.6	210.261	355.157	-0.847187	0.983968	-0.756275
ENSMUSG00000054766.13	403.506	641.247	-0.847154	0.983966	-0.668292
ENSMUSG00000058793.14	679.055	1061.71	-0.846894	0.983954	-0.644795
ENSMUSG00000056201.8	864.749	1205.2	-0.846357	0.983929	-0.478923
ENSMUSG00000028434.12	105.757	215.981	-0.846	0.983912	-1.03015
ENSMUSG00000020458.16	5777.92	7257.05	-0.84518	0.983874	-0.328832
ENSMUSG00000025290.17	867.638	1360.22	-0.842597	0.983758	-0.648677
ENSMUSG00000028416.13	140.775	325.797	-0.840823	0.983681	-1.21059
ENSMUSG00000045095.16	313.466	521.004	-0.840669	0.983674	-0.732989
ENSMUSG00000020333.17	541.248	785.178	-0.839569	0.983628	-0.536729
ENSMUSG00000013353.10	55.7007	115.511	-0.838914	0.983601	-1.05226
ENSMUSG00000049957.14	19.3165	62.725	-0.838187	0.983571	-1.6992
ENSMUSG00000073680.2	1736.87	2303.8	-0.837819	0.983556	-0.407527
ENSMUSG00000060961.16	1581.04	2080.08	-0.836659	0.983509	-0.395761
ENSMUSG00000069670.8	365.645	681.167	-0.836626	0.983508	-0.897565
ENSMUSG00000032349.13	402.194	647.397	-0.836269	0.983493	-0.686759
ENSMUSG00000109196.1	238.677	514.29	-0.836037	0.983484	-1.10753
ENSMUSG00000038280.12	103.408	196.931	-0.835666	0.983469	-0.929347
ENSMUSG00000021838.17	548.04	846.536	-0.83348	0.983383	-0.627289
ENSMUSG00000036779.12	93.0731	191.34	-0.833388	0.983379	-1.0397
ENSMUSG00000035310.15	122.104	248.474	-0.833292	0.983376	-1.02499
ENSMUSG00000015363.13	16.1069	46.9761	-0.829361	0.983222	-1.54425
ENSMUSG00000026784.14	17.2556	53.069	-0.829197	0.983216	-1.62081
ENSMUSG00000034574.10	1691.86	2501.45	-0.829158	0.983214	-0.564154
ENSMUSG00000030323.13	51.9401	123.505	-0.828981	0.983208	-1.24964
ENSMUSG00000020873.15	41.4472	81.6683	-0.827933	0.983166	-0.9785
ENSMUSG00000003452.15	457.902	770.515	-0.826823	0.983123	-0.750785
ENSMUSG00000020647.10	432.44	707.986	-0.824913	0.983046	-0.711222
ENSMUSG00000020899.16	200.609	360.512	-0.824737	0.983038	-0.845658
ENSMUSG00000052915.14	188.987	360.671	-0.821647	0.982908	-0.932398
ENSMUSG00000000420.15	183.243	341.385	-0.821184	0.982888	-0.897642
ENSMUSG00000024571.15	50.7523	114.903	-0.82104	0.982882	-1.17887
ENSMUSG00000027674.16	1183.99	1588.65	-0.817856	0.982734	-0.424146
ENSMUSG00000021939.8	838.975	1202.37	-0.817245	0.982704	-0.519182
ENSMUSG00000022425.16	5073.56	6814.82	-0.817224	0.982703	-0.425677
ENSMUSG00000001052.15	183.54	332.808	-0.813487	0.982506	-0.858594
ENSMUSG00000022477.13	756.687	1179.43	-0.812767	0.982465	-0.640323
ENSMUSG00000020170.4	446.656	738.768	-0.810993	0.982359	-0.725958
ENSMUSG00000039913.12	369.96	617.44	-0.806117	0.982026	-0.738929
ENSMUSG00000031930.11	82.2162	205.133	-0.805174	0.981954	-1.31907
ENSMUSG00000026830.9	2580.95	3481.56	-0.802726	0.981755	-0.431829
ENSMUSG00000023927.15	205.456	403.366	-0.802136	0.981704	-0.973257
ENSMUSG00000028552.13	1686.62	2270.42	-0.801583	0.981656	-0.428825
ENSMUSG00000070822.5	16.3939	41.9607	-0.801579	0.981656	-1.35588
ENSMUSG00000040520.7	263.867	487.029	-0.80114	0.981616	-0.884195
ENSMUSG00000035150.15	191.407	365.65	-0.801022	0.981605	-0.933824
ENSMUSG00000035342.14	90.4042	180.107	-0.799759	0.981489	-0.994391
ENSMUSG00000036097.8	169.827	322.753	-0.799695	0.981483	-0.926359
ENSMUSG00000037062.13	869.378	1204.7	-0.797685	0.981286	-0.470613
ENSMUSG00000038740.9	396.834	612.234	-0.797263	0.981243	-0.625547
ENSMUSG00000026872.18	4410.08	5510.4	-0.796363	0.981149	-0.321352
ENSMUSG00000004843.7	88.0174	180.857	-0.795797	0.981088	-1.03899
ENSMUSG00000024991.8	1063.4	1430.33	-0.795303	0.981035	-0.427662
ENSMUSG00000032777.9	362.955	585.873	-0.795094	0.981012	-0.690794
ENSMUSG00000037373.12	285.903	472.793	-0.793133	0.980791	-0.725681
ENSMUSG00000098274.7	195.584	366.241	-0.7929	0.980764	-0.905005
ENSMUSG00000059981.12	274.522	473.388	-0.792561	0.980724	-0.7861
ENSMUSG00000021264.12	249.427	422.525	-0.792495	0.980716	-0.760418
ENSMUSG00000042726.14	72.1462	171.613	-0.792466	0.980713	-1.25016
ENSMUSG00000035311.16	509.838	807.968	-0.791835	0.980638	-0.664259
ENSMUSG00000037031.10	287.874	518.358	-0.78879	0.980259	-0.848512
ENSMUSG00000052488.7	117.034	207.974	-0.787913	0.980145	-0.829473
ENSMUSG00000032498.9	37.6654	79.7891	-0.785368	0.979803	-1.08295
ENSMUSG00000029838.11	2100.37	2608.16	-0.785205	0.979781	-0.312386
ENSMUSG00000031099.16	33.3867	122.786	-0.785063	0.979761	-1.8788
ENSMUSG00000006005.18	790.043	1129.03	-0.784174	0.979638	-0.515085
ENSMUSG00000014599.10	214.822	384.705	-0.784056	0.979621	-0.840609
ENSMUSG00000028333.10	340.904	593.523	-0.783946	0.979606	-0.799936
ENSMUSG00000075062.4	26.1753	64.7609	-0.782293	0.979371	-1.30692
ENSMUSG00000014313.15	356.501	603.957	-0.781914	0.979316	-0.760538
ENSMUSG00000028830.14	184.469	350.595	-0.781182	0.97921	-0.926425
ENSMUSG00000025060.15	1213.83	1878.11	-0.780411	0.979098	-0.629711
ENSMUSG00000011751.16	76.8493	192.524	-0.78036	0.97909	-1.32493
ENSMUSG00000017390.15	1613.25	2145.21	-0.780263	0.979076	-0.411148
ENSMUSG00000022043.19	270.073	447.183	-0.780241	0.979073	-0.727517
ENSMUSG00000034247.9	82.5535	178.456	-0.77998	0.979035	-1.11217
ENSMUSG00000071866.12	668.332	983.525	-0.779228	0.978924	-0.557396
ENSMUSG00000022231.10	674.761	1006.68	-0.779003	0.978891	-0.57716
ENSMUSG00000020594.14	935.452	1372.35	-0.777862	0.978721	-0.552915
ENSMUSG00000010175.13	852.152	1223.31	-0.777456	0.97866	-0.521607
ENSMUSG00000002831.14	43.6	108.163	-0.776024	0.978446	-1.3108
ENSMUSG00000006057.15	35.9532	75.9824	-0.775893	0.978426	-1.07955
ENSMUSG00000016319.3	201.745	340.014	-0.775494	0.978366	-0.753059
ENSMUSG00000041912.12	98.1814	187.276	-0.775245	0.978329	-0.931641
ENSMUSG00000040759.9	250.275	452.615	-0.774959	0.978286	-0.854773
ENSMUSG00000040462.13	262.449	449.306	-0.774203	0.978172	-0.775663
ENSMUSG00000023353.14	152.46	294.588	-0.773796	0.978111	-0.950268
ENSMUSG00000068267.5	351.427	595.522	-0.772849	0.977969	-0.760931
ENSMUSG00000036188.4	61.8567	132.05	-0.772527	0.977921	-1.09408
ENSMUSG00000031835.16	223.627	370.681	-0.771365	0.977747	-0.729083
ENSMUSG00000062209.15	878.887	1297.54	-0.770762	0.977658	-0.56203
ENSMUSG00000031703.8	486.963	741.571	-0.770479	0.977616	-0.606772
ENSMUSG00000017286.15	115.876	240.112	-0.770222	0.977578	-1.05112
ENSMUSG00000033722.9	89.4953	185.537	-0.769054	0.977406	-1.05182
ENSMUSG00000070639.5	757.287	1069.59	-0.768952	0.977391	-0.498143
ENSMUSG00000042572.12	60.9556	112.789	-0.768904	0.977384	-0.887789
ENSMUSG00000034892.8	375.194	652.949	-0.768662	0.977349	-0.799335
ENSMUSG00000061130.13	341.826	534.576	-0.768046	0.97726	-0.645133
ENSMUSG00000097148.2	64.3212	152.111	-0.767663	0.977205	-1.24175
ENSMUSG00000062825.15	2342.48	1578.04	1.2783	0.977063	0.569904
ENSMUSG00000042699.11	1064.6	667.165	1.27604	0.97683	0.674192
ENSMUSG00000020792.15	100.668	174.922	-0.764972	0.976824	-0.7971
ENSMUSG00000069014.4	422.929	71.2564	1.14118	0.976797	2.56932
ENSMUSG00000026425.15	939.746	480.596	1.14198	0.976773	0.967445
ENSMUSG00000024187.15	97.8226	202.476	-0.764465	0.976755	-1.04951
ENSMUSG00000054477.16	73.6476	150.61	-0.764007	0.976692	-1.03211
ENSMUSG00000054716.4	18.3691	49.1567	-0.763753	0.976658	-1.42011
ENSMUSG00000022295.8	515.205	209.715	1.13231	0.97655	1.29672
ENSMUSG00000025505.16	59.1893	122.751	-0.762862	0.976539	-1.05232
ENSMUSG00000033068.16	21.864	51.9785	-0.762231	0.976456	-1.24936
ENSMUSG00000002833.11	114.418	230.132	-0.762231	0.976456	-1.00815
ENSMUSG00000040721.9	458.88	188.181	1.12952	0.976291	1.286
ENSMUSG00000036499.9	905.535	497.692	1.14904	0.976206	0.863519
ENSMUSG00000031529.5	859.968	1133.25	-0.759615	0.976126	-0.398112
ENSMUSG00000029571.14	748.369	1130.87	-0.759087	0.976062	-0.595614
ENSMUSG00000031523.16	494.903	183.606	1.12737	0.976043	1.43054
ENSMUSG00000023022.14	151.533	264.796	-0.758782	0.976026	-0.805251
ENSMUSG00000022820.4	47.8085	103.068	-0.758419	0.975982	-1.10825
ENSMUSG00000002948.19	187.012	321.996	-0.758133	0.975949	-0.783911
ENSMUSG00000015522.18	170.073	320.36	-0.7567	0.975787	-0.913542
ENSMUSG00000021840.17	367.299	161.003	1.15203	0.975779	1.18987
ENSMUSG00000057572.15	114.973	206.931	-0.756541	0.975769	-0.847856
ENSMUSG00000021794.16	1122.24	1445.47	-0.756107	0.975721	-0.365155
ENSMUSG00000025078.9	153.638	288.971	-0.755836	0.975693	-0.911386
ENSMUSG00000040118.15	249.799	506.989	-0.755668	0.975675	-1.02119
ENSMUSG00000030105.8	444.019	639.966	-0.755564	0.975664	-0.527375
ENSMUSG00000029390.13	206.672	367.279	-0.755532	0.97566	-0.829534
ENSMUSG00000024665.8	561.608	821.905	-0.755206	0.975626	-0.549409
ENSMUSG00000026036.17	31.711	71.231	-0.7544	0.975543	-1.16752
ENSMUSG00000022516.10	164.672	52.0646	1.30945	0.975285	1.66122
ENSMUSG00000005161.15	84.3942	154.37	-0.75143	0.975263	-0.871173
ENSMUSG00000004071.13	385.741	586.613	-0.750342	0.97517	-0.604776
ENSMUSG00000036402.13	648.317	947.049	-0.750179	0.975157	-0.54674
ENSMUSG00000074340.9	121.832	32.9904	1.26472	0.975016	1.88478
ENSMUSG00000023456.16	393.516	160.102	1.15619	0.975008	1.29743
ENSMUSG00000033308.16	44.2409	104.81	-0.747912	0.974983	-1.24433
ENSMUSG00000027959.14	44.7965	89.2348	-0.747894	0.974982	-0.99422
ENSMUSG00000030890.16	211.069	377.696	-0.747135	0.974929	-0.839511
ENSMUSG00000037894.13	105.731	195.594	-0.746088	0.974861	-0.887464
ENSMUSG00000032737.13	207.317	365.022	-0.745993	0.974855	-0.816145
ENSMUSG00000024908.15	487.674	770.132	-0.745634	0.974833	-0.659189
ENSMUSG00000030201.15	498.235	721.915	-0.744893	0.974789	-0.535003
ENSMUSG00000065947.3	18071.1	28482.8	-0.743899	0.974734	-0.656404
ENSMUSG00000064358.1	32401.1	47057.8	-0.742747	0.974677	-0.538394
ENSMUSG00000073982.11	306.947	511.439	-0.741143	0.974605	-0.736573
ENSMUSG00000038267.15	590.272	888.771	-0.740085	0.974564	-0.590433
ENSMUSG00000036098.15	1786.54	2321.36	-0.73925	0.974536	-0.377802
ENSMUSG00000003731.13	137.795	255.245	-0.738739	0.974519	-0.889365
ENSMUSG00000020268.14	16.5631	32.6988	-0.738462	0.974511	-0.981267
ENSMUSG00000021877.12	240.884	381.716	-0.737288	0.974478	-0.66416
ENSMUSG00000033579.16	947.262	1403.98	-0.736715	0.974463	-0.567683
ENSMUSG00000051022.7	169.671	325.651	-0.736332	0.974455	-0.940583
ENSMUSG00000001767.5	129.017	275.968	-0.736205	0.974452	-1.09694
ENSMUSG00000044708.5	1689.76	2090.9	-0.734456	0.974418	-0.30731
ENSMUSG00000066595.9	60.5625	107.112	-0.734366	0.974417	-0.82263
ENSMUSG00000035495.15	120.413	229.866	-0.733787	0.974408	-0.93281
ENSMUSG00000021143.10	2080.25	2583.91	-0.733701	0.974407	-0.312802
ENSMUSG00000031714.9	1418.79	1836	-0.733598	0.974405	-0.371906
ENSMUSG00000021428.9	84.7318	161.714	-0.733195	0.9744	-0.93247
ENSMUSG00000016503.18	35.4513	102.092	-0.718314	0.974372	-1.52596
ENSMUSG00000060657.8	945.77	1350.13	-0.718629	0.974372	-0.513536
ENSMUSG00000031673.6	272.156	464.22	-0.717966	0.974372	-0.770373
ENSMUSG00000039428.11	124.966	236.371	-0.730068	0.974372	-0.919512
ENSMUSG00000073664.11	705.15	975.68	-0.719765	0.974372	-0.468479
ENSMUSG00000055447.19	735.901	1049.07	-0.721008	0.97437	-0.511526
ENSMUSG00000021983.16	101.797	185.145	-0.71668	0.97437	-0.862958
ENSMUSG00000058690.14	698.842	954.124	-0.729658	0.97437	-0.449211
ENSMUSG00000000326.13	316.184	503.918	-0.722042	0.974368	-0.672423
ENSMUSG00000008575.17	886.462	1173.29	-0.729038	0.974367	-0.404429
ENSMUSG00000027882.18	451.277	638.382	-0.728665	0.974366	-0.500407
ENSMUSG00000037470.14	255.509	398.379	-0.723574	0.974365	-0.640768
ENSMUSG00000012405.16	256.368	429.295	-0.728218	0.974365	-0.743756
ENSMUSG00000025666.16	694.892	985.952	-0.727981	0.974364	-0.504728
ENSMUSG00000015749.12	243.701	445.885	-0.714953	0.974364	-0.871558
ENSMUSG00000107741.2	74.8014	151.052	-0.727441	0.974363	-1.01391
ENSMUSG00000035139.14	52.6507	100.564	-0.725181	0.974363	-0.933595
ENSMUSG00000037824.6	124.003	207.142	-0.725218	0.974363	-0.740249
ENSMUSG00000054808.15	494.822	734.781	-0.727209	0.974363	-0.570406
ENSMUSG00000032002.10	68.97	131.873	-0.725767	0.974363	-0.935109
ENSMUSG00000014776.7	23.6487	49.2751	-0.726913	0.974363	-1.0591
ENSMUSG00000041329.13	2048.49	2555.52	-0.726786	0.974363	-0.31906
ENSMUSG00000005873.6	612.376	964.683	-0.726575	0.974363	-0.655636
ENSMUSG00000069895.4	177.269	311.13	-0.725892	0.974363	-0.811582
ENSMUSG00000035762.11	104.135	194.597	-0.714651	0.974362	-0.902031
ENSMUSG00000027285.13	60.4394	127.067	-0.713648	0.974355	-1.07203
ENSMUSG00000035614.11	161.891	275.189	-0.713559	0.974355	-0.765403
ENSMUSG00000019947.10	352.416	539.572	-0.713378	0.974353	-0.614537
ENSMUSG00000018567.14	179.104	353.382	-0.713224	0.974352	-0.980429
ENSMUSG00000044533.15	482.256	764.868	-0.712172	0.974342	-0.665412
ENSMUSG00000038023.12	394.146	592.526	-0.709809	0.97431	-0.588147
ENSMUSG00000048878.6	98.0733	177.575	-0.709026	0.974296	-0.856494
ENSMUSG00000108162.1	102.045	179.172	-0.70823	0.974281	-0.812139
ENSMUSG00000079487.11	327.546	527.124	-0.707511	0.974266	-0.686446
ENSMUSG00000057666.18	1654.99	2171.02	-0.706687	0.974246	-0.391548
ENSMUSG00000039904.9	1784.21	2333.61	-0.70517	0.974205	-0.387276
ENSMUSG00000032135.15	536.447	828.563	-0.704385	0.974181	-0.627176
ENSMUSG00000020022.17	91.8036	176.395	-0.703214	0.974142	-0.942188
ENSMUSG00000116594.1	18.7857	52.822	-0.702861	0.974129	-1.4915
ENSMUSG00000050730.17	79.2051	157.536	-0.702647	0.974121	-0.992016
ENSMUSG00000029209.15	44.659	80.8516	-0.701985	0.974096	-0.856325
ENSMUSG00000033392.16	3083.38	3743.2	-0.701425	0.974074	-0.279762
ENSMUSG00000033382.15	413.393	641.338	-0.700396	0.97403	-0.633571
ENSMUSG00000027739.9	315.873	539.896	-0.700107	0.974017	-0.773336
ENSMUSG00000039976.4	295.167	478.646	-0.699838	0.974005	-0.697425
ENSMUSG00000057716.7	673.835	958.564	-0.699724	0.974	-0.50848
ENSMUSG00000040078.9	21.5515	55.0882	-0.699604	0.973994	-1.35396
ENSMUSG00000033400.14	309.881	501.762	-0.698962	0.973964	-0.695291
ENSMUSG00000029598.12	116.881	230.112	-0.69821	0.973926	-0.977297
ENSMUSG00000030298.10	114.297	194.063	-0.6969	0.973857	-0.763731
ENSMUSG00000033014.12	685.886	343.313	1.11414	0.973828	0.998445
ENSMUSG00000024457.16	113.197	188.423	-0.695932	0.973803	-0.735141
ENSMUSG00000003934.5	707.862	1056.75	-0.695587	0.973783	-0.578088
ENSMUSG00000001642.18	39.9704	84.0302	-0.69529	0.973765	-1.07197
ENSMUSG00000044042.19	171.945	320.346	-0.694086	0.973692	-0.897684
ENSMUSG00000028354.13	308.442	486.866	-0.693579	0.973659	-0.658524
ENSMUSG00000026203.16	261.142	443.208	-0.693437	0.97365	-0.763151
ENSMUSG00000026024.14	142.805	282.911	-0.692599	0.973595	-0.986304
ENSMUSG00000019820.11	685.727	1023.57	-0.692372	0.97358	-0.577899
ENSMUSG00000052299.9	422.965	580.946	-0.691786	0.973539	-0.457865
ENSMUSG00000031924.4	226.99	376.145	-0.691295	0.973505	-0.728661
ENSMUSG00000035629.19	291.09	490.072	-0.6912	0.973498	-0.75153
ENSMUSG00000024640.9	637.598	863.307	-0.690617	0.973456	-0.437228
ENSMUSG00000039463.14	226.016	77.7457	1.16293	0.973387	1.53959
ENSMUSG00000021750.16	1011.53	1353.63	-0.689505	0.973374	-0.420298
ENSMUSG00000021458.17	204.219	329.373	-0.688771	0.973318	-0.689607
ENSMUSG00000042439.13	697.428	942.811	-0.688597	0.973304	-0.434925
ENSMUSG00000039533.8	534.635	764.592	-0.688357	0.973285	-0.516137
ENSMUSG00000022351.14	98.6129	183.913	-0.68823	0.973275	-0.899177
ENSMUSG00000034681.17	79.0955	149.937	-0.68822	0.973275	-0.92269
ENSMUSG00000041491.8	12.6714	51.5753	-0.688186	0.973272	-2.0251
ENSMUSG00000041444.14	772.162	1127.42	-0.687739	0.973236	-0.546052
ENSMUSG00000062908.12	75.4186	134.156	-0.687576	0.973223	-0.830917
ENSMUSG00000000340.10	121.965	219.77	-0.687503	0.973217	-0.849526
ENSMUSG00000030265.14	374.344	603.43	-0.686527	0.973138	-0.688822
ENSMUSG00000019054.13	155.729	270.811	-0.686154	0.973107	-0.798245
ENSMUSG00000031823.14	18.2754	40.1798	-0.685669	0.973066	-1.13657
ENSMUSG00000054752.16	162.119	269.837	-0.68512	0.973019	-0.735035
ENSMUSG00000002763.16	84.1469	165.745	-0.683048	0.972836	-0.977984
ENSMUSG00000020100.15	409.92	580.051	-0.682758	0.97281	-0.500838
ENSMUSG00000022889.7	40.0228	96.4393	-0.682204	0.972759	-1.2688
ENSMUSG00000068290.11	129.491	247.898	-0.681544	0.972698	-0.936902
ENSMUSG00000017667.9	230.987	93.8906	1.16548	0.972679	1.29876
ENSMUSG00000064373.12	1607.44	2129.84	-0.680661	0.972614	-0.405979
ENSMUSG00000044080.9	122.024	199.407	-0.680623	0.972611	-0.708552
ENSMUSG00000040325.16	352.861	136.233	0.956418	0.972504	1.37302
ENSMUSG00000027698.14	303.449	123.752	0.953214	0.972467	1.294
ENSMUSG00000032481.17	628.105	387.427	0.959001	0.972451	0.697082
ENSMUSG00000064357.1	73488.5	108882	-0.678882	0.972441	-0.567176
ENSMUSG00000026893.4	101.113	221.705	-0.678862	0.972439	-1.13268
ENSMUSG00000038806.7	210.544	79.7763	0.952364	0.972439	1.40009
ENSMUSG00000026223.15	601.165	327.739	0.951412	0.972399	0.875214
ENSMUSG00000066568.12	285.405	442.401	-0.67809	0.972363	-0.632342
ENSMUSG00000024347.16	108.619	178.908	-0.678039	0.972357	-0.719947
ENSMUSG00000015656.17	5197.72	3968.58	1.32089	0.972342	0.389256
ENSMUSG00000019872.13	205.694	102	0.950308	0.972339	1.01193
ENSMUSG00000106038.1	58.5135	23.2044	0.950193	0.972332	1.33437
ENSMUSG00000046230.11	662.753	352.692	0.961601	0.972319	0.910062
ENSMUSG00000006800.14	620.685	846.893	-0.677508	0.972304	-0.448319
ENSMUSG00000048330.14	378.458	175.586	0.961921	0.972297	1.10795
ENSMUSG00000015709.9	562.755	777.002	-0.677398	0.972292	-0.465412
ENSMUSG00000015944.9	125.322	231.346	-0.677309	0.972283	-0.884407
ENSMUSG00000064368.1	2338	3576.5	-0.677189	0.972271	-0.613277
ENSMUSG00000042390.9	518.556	720.203	-0.677087	0.972261	-0.473904
ENSMUSG00000029090.12	79.3398	161.618	-0.676618	0.972212	-1.02647
ENSMUSG00000033326.15	211.15	326.199	-0.674944	0.972037	-0.627483
ENSMUSG00000056124.5	312.313	123.117	0.966189	0.971904	1.34296
ENSMUSG00000111640.1	55.9026	118.31	-0.673648	0.971897	-1.08159
ENSMUSG00000039967.14	934.682	597.619	0.944984	0.97189	0.64525
ENSMUSG00000065979.12	39.5715	90.5096	-0.673082	0.971835	-1.19361
ENSMUSG00000043085.14	39.4072	6.88944	0.966945	0.971814	2.516
ENSMUSG00000096780.7	259.004	94.3785	1.1043	0.971812	1.45645
ENSMUSG00000032011.5	1649.9	440.156	0.944057	0.971787	1.90629
ENSMUSG00000029763.17	334.029	479.147	-0.671392	0.971646	-0.520496
ENSMUSG00000046364.14	485.873	771.447	-0.671185	0.971622	-0.666988
ENSMUSG00000057541.14	138.335	253.717	-0.670882	0.971588	-0.875056
ENSMUSG00000023845.7	1250.71	907.894	0.942387	0.971585	0.462154
ENSMUSG00000074884.12	129.258	263.431	-0.670583	0.971553	-1.02718
ENSMUSG00000043456.17	863.333	1159.85	-0.670389	0.971531	-0.425949
ENSMUSG00000024122.16	595.046	329.146	1.16953	0.971481	0.854276
ENSMUSG00000043909.16	562.406	323.093	0.969748	0.97143	0.799661
ENSMUSG00000028886.15	164.07	300.738	-0.669038	0.971372	-0.874198
ENSMUSG00000027447.6	3483.27	2617.23	0.939529	0.971198	0.4124
ENSMUSG00000029334.14	94.3242	28.5937	1.24938	0.971178	1.72193
ENSMUSG00000054611.17	821.232	534.699	0.971371	0.971174	0.619062
ENSMUSG00000018677.9	57.1016	123.086	-0.66735	0.971169	-1.10807
ENSMUSG00000024176.10	655.706	959.698	-0.667026	0.971128	-0.549531
ENSMUSG00000064341.1	51094.2	75790.7	-0.666828	0.971104	-0.56886
ENSMUSG00000003534.17	760.739	1073.22	-0.666418	0.971053	-0.496473
ENSMUSG00000027395.15	30.4004	65.1243	-0.665887	0.970986	-1.0991
ENSMUSG00000033595.7	1146.64	1559.66	-0.665545	0.970943	-0.443821
ENSMUSG00000020755.9	62.1663	127.348	-0.664235	0.970774	-1.03457
ENSMUSG00000028114.16	149.123	50.7129	0.831259	0.970742	1.55608
ENSMUSG00000040667.11	268.083	123.981	0.831742	0.97074	1.11256
ENSMUSG00000036353.13	616.274	303.77	0.827744	0.970728	1.02059
ENSMUSG00000004535.12	1192.56	854.96	0.835155	0.970707	0.480132
ENSMUSG00000054640.15	1655.79	937.104	0.824501	0.970678	0.821242
ENSMUSG00000074467.4	12.0563	3.67476	0.822671	0.970635	1.71406
ENSMUSG00000036371.6	1019.62	720.758	0.821962	0.970615	0.500447
ENSMUSG00000002107.18	1329.3	766.961	0.821579	0.970604	0.793447
ENSMUSG00000041528.15	234.617	130.381	0.839896	0.970593	0.847569
ENSMUSG00000038116.16	348.251	531.814	-0.662822	0.970586	-0.610793
ENSMUSG00000042507.15	328.814	167.625	0.935527	0.970585	0.972036
ENSMUSG00000048154.17	1853.95	1431.41	0.935182	0.97053	0.373166
ENSMUSG00000020570.15	537.823	784.899	-0.662402	0.970528	-0.545375
ENSMUSG00000030655.15	1531.87	1133.96	0.819285	0.970526	0.433926
ENSMUSG00000037972.7	88.4343	174.67	-0.662384	0.970526	-0.981954
ENSMUSG00000049721.14	151.759	266.881	-0.662159	0.970495	-0.814409
ENSMUSG00000038860.15	339.019	111.407	0.842603	0.970492	1.60552
ENSMUSG00000053253.16	337.974	186.121	0.934911	0.970485	0.860671
ENSMUSG00000055296.14	1262.78	819.803	0.975222	0.970481	0.623256
ENSMUSG00000075091.5	20.2925	7.74067	0.81774	0.970465	1.39042
ENSMUSG00000028945.9	238.17	126.872	0.816891	0.970428	0.908618
ENSMUSG00000064137.6	469.164	260.057	0.934431	0.970407	0.851264
ENSMUSG00000033478.5	231.873	95.2984	0.816331	0.970403	1.28281
ENSMUSG00000035248.9	76866.7	104190	-0.661329	0.97038	-0.438787
ENSMUSG00000027820.12	45.7299	12.9219	0.814963	0.970336	1.82332
ENSMUSG00000024101.15	135.979	67.0663	0.814503	0.970312	1.01972
ENSMUSG00000072214.7	355.51	130.709	0.814444	0.970309	1.44353
ENSMUSG00000037419.9	835.082	1179.75	-0.660596	0.970277	-0.498491
ENSMUSG00000029313.18	338.488	167.72	0.813434	0.970255	1.01305
ENSMUSG00000024976.14	192.487	313.504	-0.66044	0.970255	-0.703721
ENSMUSG00000024065.8	206.361	81.1937	0.847852	0.970221	1.34573
ENSMUSG00000095041.7	632.459	377.503	0.933226	0.970208	0.744485
ENSMUSG00000003545.3	2767.25	1989.86	0.849149	0.970139	0.475785
ENSMUSG00000004897.16	157.838	284.252	-0.659488	0.970118	-0.848728
ENSMUSG00000019806.13	391.135	211.16	0.84998	0.970084	0.889326
ENSMUSG00000028528.17	478.654	777.179	-0.659153	0.970069	-0.699266
ENSMUSG00000021978.9	277.706	419.607	-0.658855	0.970025	-0.595478
ENSMUSG00000037720.16	364.065	562.279	-0.658484	0.96997	-0.62709
ENSMUSG00000025155.15	58.0493	14.7525	0.808644	0.969958	1.97632
ENSMUSG00000024542.9	252.238	113.094	0.808042	0.969915	1.15727
ENSMUSG00000034220.7	155.599	278.208	-0.657868	0.969877	-0.838332
ENSMUSG00000009079.16	553.391	772.667	-0.657858	0.969875	-0.481546
ENSMUSG00000025735.13	36.6367	5.33966	0.978214	0.969872	2.77847
ENSMUSG00000042650.3	718.291	397.913	1.09457	0.96986	0.852117
ENSMUSG00000059409.9	276.252	125.202	0.978339	0.969846	1.14172
ENSMUSG00000027490.17	24.7503	7.84306	0.930817	0.969803	1.65796
ENSMUSG00000022391.16	277.198	110.47	0.854016	0.969783	1.32726
ENSMUSG00000020456.17	625.965	349.565	0.978706	0.969767	0.840522
ENSMUSG00000028953.10	256.807	121.667	0.805749	0.969746	1.07775
ENSMUSG00000034902.17	609.53	249.692	0.929922	0.969651	1.28755
ENSMUSG00000025228.5	593.673	323.217	0.855844	0.96963	0.877165
ENSMUSG00000024985.20	525.702	747.539	-0.655892	0.969569	-0.507904
ENSMUSG00000038831.16	623.033	870.778	-0.655759	0.969548	-0.482996
ENSMUSG00000091896.8	820.929	563.342	0.929259	0.969538	0.543245
ENSMUSG00000047454.12	417.918	247.335	0.802875	0.969515	0.756753
ENSMUSG00000002103.16	463.809	194.711	1.24357	0.969507	1.2522
ENSMUSG00000027577.14	63.0958	13.3673	0.857604	0.969475	2.23884
ENSMUSG00000053774.9	572.64	334.917	0.8581	0.969429	0.773824
ENSMUSG00000036403.15	149.769	51.2269	1.17634	0.969371	1.54776
ENSMUSG00000081236.1	14.5249	3.29537	0.927873	0.969303	2.14002
ENSMUSG00000042751.14	262.771	109.136	0.800344	0.969295	1.26768
ENSMUSG00000077450.13	326.663	479.592	-0.654199	0.969293	-0.554006
ENSMUSG00000019849.11	95.1566	38.1999	0.859853	0.969265	1.31673
ENSMUSG00000022403.15	1011.62	698.996	0.860176	0.969233	0.53331
ENSMUSG00000056211.13	2537.01	1658.59	0.799635	0.96923	0.613167
ENSMUSG00000025220.8	1233.18	945.022	0.799058	0.969177	0.383967
ENSMUSG00000032745.18	453.636	257.851	0.860917	0.969161	0.814996
ENSMUSG00000055782.9	338.921	178.261	0.861365	0.969117	0.926956
ENSMUSG00000032959.12	206.347	104.303	0.79763	0.969042	0.984298
ENSMUSG00000062929.8	361.483	520.951	-0.652678	0.969034	-0.527218
ENSMUSG00000039826.13	115.95	55.8541	0.796563	0.968938	1.05377
ENSMUSG00000043683.4	252.435	135.142	0.796533	0.968935	0.901437
ENSMUSG00000025314.16	696.613	439.66	0.863484	0.968903	0.66397
ENSMUSG00000020850.14	1389.79	1018.48	0.795959	0.968878	0.44845
ENSMUSG00000021012.16	483.79	236.727	1.08898	0.96883	1.03116
ENSMUSG00000048307.8	277.635	162.154	0.795299	0.968812	0.775829
ENSMUSG00000036667.14	514.713	279.7	0.795242	0.968807	0.87989
ENSMUSG00000064351.1	157834	223836	-0.65132	0.968795	-0.504029
ENSMUSG00000027660.16	846.988	510.645	0.865139	0.968732	0.730021
ENSMUSG00000020532.18	1334.49	925.563	0.98378	0.968633	0.527881
ENSMUSG00000022973.18	1018.74	553.477	0.792723	0.968546	0.88019
ENSMUSG00000056476.13	491.804	250.436	0.923207	0.968533	0.973641
ENSMUSG00000026482.13	303.016	146.125	0.867184	0.968516	1.05219
ENSMUSG00000001552.14	219.296	366.551	-0.649707	0.968498	-0.741136
ENSMUSG00000066406.16	545.897	297.475	0.867567	0.968475	0.87586
ENSMUSG00000054252.18	528.815	777.577	-0.64946	0.968452	-0.556223
ENSMUSG00000003039.9	246.371	116.074	0.791822	0.968451	1.08579
ENSMUSG00000062257.13	846.885	457.836	0.867904	0.968439	0.887335
ENSMUSG00000058297.16	681.979	449.267	0.922606	0.968438	0.602153
ENSMUSG00000031229.16	2002.53	1478.61	0.791601	0.968427	0.437581
ENSMUSG00000039652.16	465.256	223.636	0.868464	0.968379	1.05688
ENSMUSG00000038014.7	597.842	825.758	-0.648973	0.96836	-0.465954
ENSMUSG00000022019.16	265.258	149.24	0.868804	0.968343	0.829764
ENSMUSG00000031993.7	386.672	226.291	0.790587	0.968317	0.772932
ENSMUSG00000032407.14	915.863	531.039	1.08571	0.968266	0.786315
ENSMUSG00000042408.13	349.297	158.287	0.92141	0.968252	1.14191
ENSMUSG00000024474.7	262.307	399.558	-0.648125	0.968195	-0.60715
ENSMUSG00000054408.9	222.099	106.208	0.78937	0.968183	1.06431
ENSMUSG00000018293.4	281.453	164.749	0.789298	0.968176	0.772621
ENSMUSG00000030660.9	850.557	577.883	0.92063	0.968134	0.557631
ENSMUSG00000013236.17	1566.65	1049.92	0.871062	0.968101	0.577406
ENSMUSG00000040687.16	365.468	172.586	0.871557	0.968048	1.08243
ENSMUSG00000069094.12	197.312	325.462	-0.647268	0.968025	-0.722012
ENSMUSG00000006373.10	364.701	172.787	0.871801	0.968022	1.07772
ENSMUSG00000021190.14	903.855	599.394	0.919688	0.967994	0.592586
ENSMUSG00000029103.16	338.65	180.857	0.78709	0.967928	0.904944
ENSMUSG00000033417.16	456.958	261.29	0.91918	0.96792	0.806407
ENSMUSG00000033705.17	764.388	419.491	0.986859	0.967919	0.865665
ENSMUSG00000030086.16	11.6484	23.4001	-0.646718	0.967915	-1.00639
ENSMUSG00000039456.10	248.193	95.856	0.872825	0.967913	1.37252
ENSMUSG00000026851.9	150.245	276.196	-0.646401	0.96785	-0.878377
ENSMUSG00000008206.16	207.495	92.5345	0.785814	0.967782	1.16501
ENSMUSG00000032060.10	830.025	1192.94	-0.645999	0.967767	-0.523294
ENSMUSG00000068250.13	62.1672	120.467	-0.645873	0.967741	-0.954413
ENSMUSG00000019943.10	843.511	483.838	0.784974	0.967685	0.801883
ENSMUSG00000038141.11	381.164	169.838	0.916969	0.967614	1.16626
ENSMUSG00000032087.11	793.799	470.922	0.916485	0.967551	0.753286
ENSMUSG00000049001.5	78.543	31.9597	0.876693	0.967513	1.29723
ENSMUSG00000012114.17	350.154	130.512	1.08089	0.967495	1.4238
ENSMUSG00000043411.15	692.504	433.984	0.915985	0.967486	0.674181
ENSMUSG00000065954.11	877.743	524.182	0.988753	0.96748	0.74373
ENSMUSG00000064345.1	55813.1	83532.7	-0.644291	0.967405	-0.581737
ENSMUSG00000037902.18	1101.82	705.736	0.915237	0.967393	0.642691
ENSMUSG00000021196.14	608.337	360.799	0.781431	0.96727	0.753678
ENSMUSG00000023805.17	461.36	666.149	-0.643571	0.967249	-0.529953
ENSMUSG00000001995.9	331.655	162.363	0.879528	0.967238	1.03046
ENSMUSG00000063659.11	688.874	345.719	0.913688	0.967209	0.994639
ENSMUSG00000022505.9	95.8388	156.058	-0.643346	0.967198	-0.703399
ENSMUSG00000002416.13	39.3021	79.2686	-0.643082	0.967139	-1.01214
ENSMUSG00000038174.14	332.015	186.766	0.78022	0.967126	0.830019
ENSMUSG00000007836.6	231.199	115.082	0.779832	0.967079	1.00647
ENSMUSG00000032423.12	796.352	470.874	0.881605	0.967051	0.758066
ENSMUSG00000038418.7	3592.71	2668.43	1.07775	0.967029	0.429081
ENSMUSG00000021111.15	774.23	425.241	1.18418	0.967026	0.864482
ENSMUSG00000017740.17	489.267	105.61	0.882038	0.967013	2.21188
ENSMUSG00000036890.13	242.734	122.212	0.88239	0.966983	0.989994
ENSMUSG00000037646.10	1228.14	748.573	0.911376	0.966963	0.714256
ENSMUSG00000071856.10	484.731	301.236	0.882721	0.966956	0.686291
ENSMUSG00000020680.15	148.045	255.647	-0.642239	0.966949	-0.788116
ENSMUSG00000025326.12	1429.17	1043.63	0.778528	0.966923	0.45356
ENSMUSG00000035776.14	149.892	60.6809	0.778474	0.966917	1.30461
ENSMUSG00000031144.15	466.303	124.225	0.91074	0.966902	1.90831
ENSMUSG00000034748.16	27.0765	5.03609	0.910571	0.966886	2.42667
ENSMUSG00000054693.14	752.28	433.425	0.991478	0.966856	0.795485
ENSMUSG00000027805.16	755.934	457.453	0.777771	0.966833	0.724637
ENSMUSG00000039997.16	42.5318	94.5132	-0.641704	0.966826	-1.15197
ENSMUSG00000030216.12	227.286	349.626	-0.641661	0.966816	-0.6213
ENSMUSG00000052557.11	374.408	211.302	0.90804	0.966672	0.825303
ENSMUSG00000020358.17	449.541	277.511	0.886628	0.966663	0.695907
ENSMUSG00000027210.20	307.897	158.027	0.776181	0.966642	0.962279
ENSMUSG00000030057.15	673.911	399.783	0.907082	0.966603	0.753342
ENSMUSG00000063531.7	25.1519	63.5675	-0.639903	0.966399	-1.33762
ENSMUSG00000049556.5	366.25	67.4139	1.33954	0.966394	2.44171
ENSMUSG00000028782.14	746.599	343.8	0.993706	0.966362	1.11876
ENSMUSG00000056004.16	284.736	158.73	0.896062	0.966287	0.843052
ENSMUSG00000054051.7	255.891	114.576	0.898764	0.966284	1.15922
ENSMUSG00000049323.8	309.374	115.327	0.896435	0.966284	1.42362
ENSMUSG00000039477.16	697.029	440.664	0.89826	0.966281	0.661539
ENSMUSG00000024981.6	60.2212	17.7981	0.772198	0.966164	1.75855
ENSMUSG00000041685.16	518.704	723.819	-0.638761	0.966119	-0.480719
ENSMUSG00000031010.17	2422.86	1976	0.770375	0.965947	0.294134
ENSMUSG00000062580.9	342.002	164.023	0.770342	0.965943	1.06011
ENSMUSG00000030451.16	1679.71	1197	1.18857	0.965863	0.488787
ENSMUSG00000031327.10	137.487	207.552	-0.637733	0.96586	-0.594176
ENSMUSG00000039205.16	283.123	160.09	0.769423	0.965834	0.822547
ENSMUSG00000020257.13	342.969	176.306	0.769358	0.965827	0.959998
ENSMUSG00000025041.17	382.907	182.109	0.996528	0.965765	1.07219
ENSMUSG00000030401.16	114.265	187.585	-0.636519	0.965547	-0.715153
ENSMUSG00000037563.15	146.546	251.085	-0.6361	0.965437	-0.776821
ENSMUSG00000001416.13	403.028	172.886	1.50304	0.965429	1.22106
ENSMUSG00000020349.4	808.817	1051.28	-0.635984	0.965407	-0.378263
ENSMUSG00000037458.15	611.822	347.711	1.06485	0.965399	0.815224
ENSMUSG00000054920.12	578.734	368.035	0.76555	0.965382	0.653056
ENSMUSG00000035547.14	280.618	469.079	-0.635863	0.965374	-0.741224
ENSMUSG00000046567.10	38.2796	78.5709	-0.635844	0.965369	-1.03742
ENSMUSG00000061601.15	1942.3	1144.18	0.765306	0.965354	0.763451
ENSMUSG00000020368.15	1722.03	2155.91	-0.635361	0.965239	-0.324187
ENSMUSG00000035941.15	330.708	203.871	0.763626	0.965162	0.697904
ENSMUSG00000053929.17	341.299	529.515	-0.634969	0.965134	-0.633634
ENSMUSG00000001270.9	1999.76	2463.48	-0.634837	0.965098	-0.300872
ENSMUSG00000016921.14	463.999	672.799	-0.634452	0.964993	-0.536053
ENSMUSG00000032803.15	412.04	628.643	-0.634437	0.964988	-0.609457
ENSMUSG00000036835.7	61.4566	118.778	-0.634122	0.964902	-0.950632
ENSMUSG00000034928.16	480.129	272.494	0.761179	0.964888	0.817194
ENSMUSG00000015697.14	278.592	170.553	0.761017	0.96487	0.707932
ENSMUSG00000004865.16	193.077	296.312	-0.633869	0.964832	-0.617939
ENSMUSG00000018427.8	796.016	1184.53	-0.633475	0.964722	-0.573445
ENSMUSG00000053560.5	137.602	252.357	-0.633306	0.964674	-0.874963
ENSMUSG00000032193.9	211.848	326.438	-0.633073	0.964609	-0.623784
ENSMUSG00000041773.8	928.573	201.909	1.22374	0.964524	2.20131
ENSMUSG00000030824.17	350.049	209.609	0.756127	0.964346	0.739856
ENSMUSG00000028180.18	477.453	290.277	0.755683	0.964301	0.717927
ENSMUSG00000003814.8	1093.29	758.241	1.05332	0.964267	0.527948
ENSMUSG00000032437.10	673.094	341.071	1.05255	0.9642	0.980733
ENSMUSG00000042700.16	391.348	692.297	-0.631122	0.964046	-0.822938
ENSMUSG00000037754.13	2011.94	2371.31	-0.631082	0.964035	-0.237097
ENSMUSG00000002679.14	83.6786	44.2336	0.752512	0.963982	0.919717
ENSMUSG00000033863.2	568.727	760.529	-0.630893	0.963979	-0.419266
ENSMUSG00000031917.12	91.5257	43.5655	0.751985	0.963931	1.07099
ENSMUSG00000047714.14	528.557	246.8	1.04813	0.96384	1.09872
ENSMUSG00000028863.13	256.006	101.679	1.00864	0.96376	1.33216
ENSMUSG00000000538.18	694.332	937.831	-0.630154	0.963759	-0.433702
ENSMUSG00000026915.16	1001.34	589.376	0.749352	0.963683	0.764672
ENSMUSG00000017421.18	943.594	680.63	0.748812	0.963633	0.471295
ENSMUSG00000026259.14	358.222	205.736	0.748605	0.963614	0.800059
ENSMUSG00000026918.16	167.048	293.799	-0.629582	0.963588	-0.814566
ENSMUSG00000003134.10	95.9135	29.9533	0.746636	0.963439	1.67902
ENSMUSG00000030722.7	33.2369	9.86771	0.746089	0.963392	1.752
ENSMUSG00000043384.15	804.892	464.847	0.745826	0.963369	0.792041
ENSMUSG00000048661.14	394.283	195.606	1.04031	0.963301	1.01128
ENSMUSG00000020220.16	1346.81	912.008	1.01459	0.963182	0.562425
ENSMUSG00000025268.15	137.115	59.0172	1.03756	0.963148	1.21618
ENSMUSG00000038279.10	72.3372	9.49676	1.20893	0.963145	2.92923
ENSMUSG00000066036.14	1705.79	2013.78	-0.627848	0.963054	-0.239469
ENSMUSG00000021831.9	370.798	215.135	0.741203	0.962996	0.785391
ENSMUSG00000033389.16	34.4203	75.1316	-0.627632	0.962987	-1.12616
ENSMUSG00000028402.18	767.927	470.126	1.03198	0.962912	0.707923
ENSMUSG00000020198.8	850.879	510.833	1.02864	0.962829	0.736103
ENSMUSG00000020740.13	340.666	178.709	1.02422	0.962806	0.930745
ENSMUSG00000022995.16	1007.7	1349.38	-0.626824	0.962732	-0.421237
ENSMUSG00000094488.2	67.4542	134.502	-0.626724	0.9627	-0.995643
ENSMUSG00000029098.17	218.936	111.172	0.735157	0.962576	0.97771
ENSMUSG00000027109.16	369.874	520.38	-0.626281	0.962559	-0.492532
ENSMUSG00000029291.11	620.203	446.148	0.732569	0.96242	0.475217
ENSMUSG00000040463.16	318.174	187.667	0.731801	0.962377	0.761642
ENSMUSG00000042046.15	392.624	239.211	0.730332	0.962298	0.714868
ENSMUSG00000028524.21	757.454	496.304	0.730089	0.962285	0.609932
ENSMUSG00000029076.14	502.744	311.113	0.729858	0.962273	0.692387
ENSMUSG00000029104.15	1072.25	798.259	0.729775	0.962269	0.425708
ENSMUSG00000082277.2	49.8741	22.8156	0.72876	0.962219	1.12827
ENSMUSG00000020331.9	430.488	248.231	0.728485	0.962205	0.794292
ENSMUSG00000021486.7	49.1406	98.836	-0.62513	0.962186	-1.00812
ENSMUSG00000038429.10	493.023	158.518	1.49575	0.962157	1.63701
ENSMUSG00000045411.16	313.033	190.82	0.727265	0.962148	0.714105
ENSMUSG00000053702.16	608.175	361.344	0.72704	0.962138	0.751112
ENSMUSG00000051339.10	265.644	136.304	0.726025	0.962094	0.962664
ENSMUSG00000038712.16	243.287	147.078	0.725793	0.962084	0.726082
ENSMUSG00000031297.14	62.2734	21.454	0.725416	0.962068	1.53737
ENSMUSG00000018425.18	198.356	303.824	-0.624632	0.962022	-0.615147
ENSMUSG00000034021.15	544.197	340.71	0.721887	0.961936	0.675585
ENSMUSG00000030754.9	485.707	335.06	0.72032	0.961886	0.535666
ENSMUSG00000056851.14	853.778	595.924	0.720218	0.961883	0.518732
ENSMUSG00000028226.15	224.565	102.445	0.71848	0.961833	1.13229
ENSMUSG00000005103.12	942.183	677.257	0.718383	0.96183	0.476303
ENSMUSG00000001844.10	84.731	28.9486	0.717584	0.961809	1.54939
ENSMUSG00000020744.13	113.415	48.0962	0.715887	0.961768	1.23762
ENSMUSG00000021134.17	1650.58	1222.58	0.713977	0.961728	0.433042
ENSMUSG00000059263.9	735.925	519.454	0.713891	0.961726	0.502563
ENSMUSG00000025235.8	107.086	37.8484	0.712808	0.961706	1.50047
ENSMUSG00000021936.14	539.498	332.525	0.712662	0.961703	0.698154
ENSMUSG00000041028.16	646.653	430.171	0.711943	0.961691	0.588081
ENSMUSG00000045038.14	745.122	338.059	0.71017	0.961662	1.1402
ENSMUSG00000018209.15	238.701	117.631	0.710147	0.961662	1.02093
ENSMUSG00000042496.18	260.952	153.921	0.709977	0.961659	0.761594
ENSMUSG00000013033.16	836.029	539.094	0.707958	0.961631	0.633017
ENSMUSG00000028478.18	449.102	276.597	0.705956	0.961605	0.699257
ENSMUSG00000034723.11	512.293	298.158	0.703818	0.961577	0.78089
ENSMUSG00000037989.15	544.695	359.091	0.703408	0.961572	0.601099
ENSMUSG00000033526.16	333.717	191.898	0.701611	0.961548	0.798286
ENSMUSG00000013663.7	1099.72	799.966	0.701384	0.961545	0.459119
ENSMUSG00000019977.16	288.869	172.271	0.700723	0.961535	0.745741
ENSMUSG00000063511.11	1235.35	883.496	0.700119	0.961526	0.483624
ENSMUSG00000051331.16	328.453	179.66	0.699479	0.961515	0.87042
ENSMUSG00000053141.16	739.096	499.548	0.697253	0.961475	0.565139
ENSMUSG00000027894.14	448.211	145.644	0.697248	0.961475	1.62173
ENSMUSG00000053453.9	214.751	122.503	0.696527	0.96146	0.809845
ENSMUSG00000060206.11	757.129	498.665	0.695529	0.961438	0.602468
ENSMUSG00000020790.14	284.914	431.36	-0.622843	0.961425	-0.598366
ENSMUSG00000055204.15	1791.37	1458.84	0.694489	0.961412	0.296249
ENSMUSG00000115890.1	55.8654	20.653	0.694154	0.961403	1.4356
ENSMUSG00000039753.16	1016.39	769.744	0.692475	0.961354	0.401005
ENSMUSG00000037487.7	1567.69	1162.4	0.692121	0.961342	0.431535
ENSMUSG00000020413.11	121.151	54.1524	0.690431	0.961282	1.16171
ENSMUSG00000028811.12	336.149	218.42	0.690406	0.961281	0.621995
ENSMUSG00000073481.9	121.641	211.738	-0.62204	0.961151	-0.799655
ENSMUSG00000003233.12	297.693	421.236	-0.621876	0.961095	-0.500804
ENSMUSG00000039578.17	114.769	48.5958	0.685543	0.96104	1.23983
ENSMUSG00000019558.14	428.196	582.288	-0.62163	0.96101	-0.44346
ENSMUSG00000052997.15	384.986	239.358	0.684844	0.960997	0.685635
ENSMUSG00000021385.10	120.818	207.67	-0.621573	0.96099	-0.781452
ENSMUSG00000026207.16	287.242	65.8532	1.36456	0.960951	2.12494
ENSMUSG00000013076.17	129.686	218.506	-0.621337	0.960909	-0.75265
ENSMUSG00000028467.15	141.038	73.7257	0.683236	0.960886	0.935846
ENSMUSG00000090671.1	371.769	230.264	0.683205	0.960884	0.691115
ENSMUSG00000019796.12	28.4421	81.7205	-0.621044	0.960807	-1.52267
ENSMUSG00000025408.15	256.551	158.645	0.680045	0.960623	0.693444
ENSMUSG00000007030.8	18.2862	6.41307	0.679934	0.960613	1.51167
ENSMUSG00000007891.16	983.177	708.522	0.679349	0.960558	0.472639
ENSMUSG00000027610.17	48.9468	130.343	-0.620137	0.96049	-1.41302
ENSMUSG00000033004.16	2348.37	1934.4	0.678538	0.960478	0.27977
ENSMUSG00000056091.12	163.534	83.8509	0.677668	0.960387	0.963694
ENSMUSG00000027288.16	1325.03	1874.97	-0.619828	0.960381	-0.500843
ENSMUSG00000078656.11	20.2804	36.2433	-0.619767	0.96036	-0.837627
ENSMUSG00000035666.14	216.983	132.336	0.677341	0.960352	0.713375
ENSMUSG00000020952.10	376.883	241.635	0.675923	0.960189	0.641291
ENSMUSG00000036054.15	260.451	156.902	0.675412	0.960129	0.731151
ENSMUSG00000027810.14	361.069	219.796	0.674788	0.96005	0.716112
ENSMUSG00000035954.10	1282.66	1017.88	0.674429	0.960004	0.333573
ENSMUSG00000052459.13	718.456	451.246	0.674234	0.959979	0.670985
ENSMUSG00000018858.15	71.1373	25.3255	0.673413	0.959869	1.49002
ENSMUSG00000020717.19	9237.26	13411.4	-0.618091	0.95976	-0.537921
ENSMUSG00000072049.6	8.20454	2.12966	1.37815	0.959724	1.9458
ENSMUSG00000049470.13	1343.37	1611.67	-0.617567	0.959571	-0.262703
ENSMUSG00000092329.1	349.179	230.637	0.671339	0.95957	0.598347
ENSMUSG00000022476.8	147.365	64.6972	0.671272	0.95956	1.18762
ENSMUSG00000038034.15	365.174	581.338	-0.617194	0.959435	-0.670796
ENSMUSG00000061904.12	602.585	803.165	-0.617135	0.959413	-0.414531
ENSMUSG00000020530.14	399.97	240.569	0.670031	0.959367	0.733439
ENSMUSG00000018965.11	676.829	366.413	0.669929	0.959351	0.885321
ENSMUSG00000035024.16	303.054	180.053	0.668972	0.959192	0.751158
ENSMUSG00000050812.18	475.691	650.381	-0.616485	0.959175	-0.451261
ENSMUSG00000020088.10	151.171	234.273	-0.616364	0.95913	-0.632003
ENSMUSG00000020300.14	1215.74	905.715	0.667089	0.958862	0.424703
ENSMUSG00000032280.16	553.312	399.044	0.666395	0.958734	0.471545
ENSMUSG00000011884.13	413.847	612.414	-0.614586	0.958468	-0.565411
ENSMUSG00000022390.11	581.834	862.152	-0.614512	0.95844	-0.567335
ENSMUSG00000027835.11	188.883	100.091	0.664779	0.958424	0.916184
ENSMUSG00000022377.16	317.263	203.308	0.664448	0.958359	0.642013
ENSMUSG00000064370.1	51333.3	72758.9	-0.613933	0.958222	-0.503229
ENSMUSG00000038446.8	349.207	225.189	0.663653	0.958197	0.632948
ENSMUSG00000044147.8	102.183	51.7907	0.663264	0.958117	0.980392
ENSMUSG00000004558.15	2006.06	2536.2	-0.613546	0.958075	-0.338303
ENSMUSG00000048012.19	50.9459	16.4303	0.662616	0.957981	1.63261
ENSMUSG00000031622.16	135.85	221.328	-0.613146	0.957923	-0.704168
ENSMUSG00000038612.16	324.314	511.383	-0.612909	0.957832	-0.657011
ENSMUSG00000026739.13	323.416	192.477	0.661816	0.957809	0.748704
ENSMUSG00000017493.12	202.474	97.3061	0.661418	0.957722	1.05714
ENSMUSG00000031826.20	217.264	118.952	0.661164	0.957666	0.869074
ENSMUSG00000046897.17	198.752	314.81	-0.612434	0.95765	-0.663508
ENSMUSG00000030835.6	167.894	278.061	-0.612082	0.957514	-0.727847
ENSMUSG00000032841.15	257.403	401.282	-0.611223	0.957182	-0.640588
ENSMUSG00000001687.15	1114.59	1441.77	-0.610579	0.95693	-0.371319
ENSMUSG00000051586.17	1299.05	1688.88	-0.61049	0.956895	-0.37861
ENSMUSG00000042873.11	257.354	144.009	0.657234	0.956749	0.837595
ENSMUSG00000024271.8	292.919	172.803	0.656403	0.956543	0.761374
ENSMUSG00000034377.10	3999.5	4806.39	-0.609222	0.956396	-0.265136
ENSMUSG00000061410.6	198.604	315.988	-0.609048	0.956327	-0.669975
ENSMUSG00000073557.12	318.476	451.148	-0.608309	0.956033	-0.502414
ENSMUSG00000028518.8	179.783	95.3658	0.654319	0.956014	0.914711
ENSMUSG00000019831.14	450.626	257.204	0.65427	0.956001	0.809016
ENSMUSG00000037111.9	776.902	1031.16	-0.607982	0.955903	-0.408471
ENSMUSG00000037606.18	80.6899	36.0458	0.65374	0.955864	1.16256
ENSMUSG00000019802.13	832.15	612.168	0.653678	0.955847	0.442915
ENSMUSG00000027340.15	405.212	238.182	0.653325	0.955754	0.76661
ENSMUSG00000051375.15	497.424	328.864	0.652772	0.955608	0.596987
ENSMUSG00000029245.16	712.738	423.09	0.6527	0.955589	0.752406
ENSMUSG00000102543.5	225.183	122.574	0.652662	0.955579	0.877444
ENSMUSG00000031601.16	358.485	217.628	0.652202	0.955455	0.720048
ENSMUSG00000044068.7	186.4	305.017	-0.606859	0.955451	-0.710486
ENSMUSG00000043535.13	833.215	370.433	1.43324	0.955377	1.16948
ENSMUSG00000059456.13	46.8449	111.006	-0.606227	0.955195	-1.24467
ENSMUSG00000030718.9	366.124	130.442	1.4375	0.955034	1.48892
ENSMUSG00000027712.13	129.273	219.863	-0.605775	0.955012	-0.76618
ENSMUSG00000001472.17	1043.58	747.372	0.649928	0.954836	0.481647
ENSMUSG00000022346.16	43.5474	14.7075	0.649463	0.954707	1.56604
ENSMUSG00000020657.16	128.782	193.636	-0.604991	0.954691	-0.58841
ENSMUSG00000020640.10	673.394	914.203	-0.603793	0.954198	-0.441064
ENSMUSG00000025609.15	1041.75	772.825	0.647412	0.95413	0.43079
ENSMUSG00000089809.9	302.157	451.447	-0.603618	0.954126	-0.57926
ENSMUSG00000069769.13	1345.97	1011.89	0.646643	0.953911	0.411599
ENSMUSG00000027634.14	722.711	465.842	0.645919	0.953704	0.633577
ENSMUSG00000024109.18	3133.14	2602.84	0.645638	0.953623	0.267521
ENSMUSG00000013736.16	147.094	254.622	-0.602181	0.953528	-0.791613
ENSMUSG00000015127.14	163.886	75.2846	0.644867	0.953401	1.12226
ENSMUSG00000055239.10	157.601	88.7781	0.644709	0.953355	0.828001
ENSMUSG00000056429.4	925.386	639.034	0.643988	0.953146	0.534164
ENSMUSG00000040351.11	1471.1	1928.17	-0.601182	0.95311	-0.390336
ENSMUSG00000003378.9	210.667	325.449	-0.60096	0.953017	-0.627467
ENSMUSG00000033379.13	76.0826	136.447	-0.600912	0.952996	-0.842703
ENSMUSG00000095463.8	234.597	136.219	0.64324	0.952928	0.784258
ENSMUSG00000033720.12	513.555	717.276	-0.600751	0.952928	-0.482009
ENSMUSG00000014602.15	6648.19	9309.87	-0.600686	0.952901	-0.485799
ENSMUSG00000024576.14	1308.99	1598.22	-0.600617	0.952872	-0.288008
ENSMUSG00000022614.8	93.5151	162.148	-0.600547	0.952842	-0.794044
ENSMUSG00000020091.15	141.617	224.212	-0.600366	0.952766	-0.66287
ENSMUSG00000057649.6	319.79	206.142	0.642113	0.9526	0.633487
ENSMUSG00000037253.8	130.226	211.122	-0.599795	0.952524	-0.697059
ENSMUSG00000034290.9	252.984	407.52	-0.599477	0.952389	-0.687822
ENSMUSG00000029840.8	645.082	387.644	0.641216	0.952337	0.734751
ENSMUSG00000032503.18	599.416	291.425	0.640672	0.952178	1.04043
ENSMUSG00000039601.16	444.842	612.895	-0.598539	0.951989	-0.462347
ENSMUSG00000064363.1	94129.7	136395	-0.598094	0.9518	-0.535068
ENSMUSG00000030850.17	270.738	395.205	-0.597984	0.951752	-0.545706
ENSMUSG00000031967.15	75.5312	125.93	-0.597891	0.951712	-0.737483
ENSMUSG00000024208.16	71.0577	25.2686	0.63877	0.95162	1.49164
ENSMUSG00000020715.9	68.6098	136.301	-0.597467	0.95153	-0.99031
ENSMUSG00000043259.15	972.462	680.532	0.638039	0.951406	0.514978
ENSMUSG00000049336.16	368.97	157.338	0.637164	0.95115	1.22964
ENSMUSG00000039219.18	658.836	857.995	-0.59536	0.950619	-0.381051
ENSMUSG00000040003.18	1015.5	780.573	0.634961	0.950508	0.379588
ENSMUSG00000004069.17	64.3676	125.039	-0.594742	0.950351	-0.957976

## Sheet: 3
	OPTO FEAR_mean	OPTO NOT FEAR_mean	theta	prob	log2FC
ENSMUSG00000000149.10	2431.21	945.28	2.90698	1	1.36286
ENSMUSG00000000184.12	24.3941	171.554	-2.5422	1	-2.81406
ENSMUSG00000000346.9	601.211	59.162	4.13119	1	3.34513
ENSMUSG00000000374.8	1019.1	597.516	1.75197	1	0.770241
ENSMUSG00000000416.16	841.85	108.11	4.14363	1	2.96107
ENSMUSG00000000568.15	529.33	228.142	1.86516	1	1.21423
ENSMUSG00000000631.20	1677.32	938.556	2.4404	1	0.837642
ENSMUSG00000000838.17	583.817	206.826	2.61099	1	1.49709
ENSMUSG00000001105.15	115.529	16.5271	2.91641	1	2.80535
ENSMUSG00000001138.13	185.802	27.5573	2.68634	1	2.75326
ENSMUSG00000001151.10	277.234	41.8967	2.58104	1	2.72619
ENSMUSG00000001542.7	513.314	101.573	3.0256	1	2.33732
ENSMUSG00000001750.16	212.028	39.3694	1.79545	1	2.42911
ENSMUSG00000001833.17	7299.91	4106.21	3.53384	1	0.830071
ENSMUSG00000002010.17	252.616	78.8771	2.07312	1	1.67927
ENSMUSG00000002274.13	258.359	94.6324	1.76638	1	1.44897
ENSMUSG00000002279.19	175.096	24.595	2.9929	1	2.83171
ENSMUSG00000002455.14	238.645	33.2979	3.10058	1	2.84137
ENSMUSG00000002546.17	296.038	39.4925	3.64443	1	2.90613
ENSMUSG00000002608.8	151.806	27.672	2.49974	1	2.45573
ENSMUSG00000002881.14	154.04	29.9984	2.41225	1	2.36035
ENSMUSG00000003038.15	418.812	35.5121	3.97839	1	3.55992
ENSMUSG00000003410.8	1836.97	1293.56	1.80707	1	0.505984
ENSMUSG00000003458.12	260.855	45.673	2.80133	1	2.51383
ENSMUSG00000003848.14	58.4076	9.6955	2.4124	1	2.59077
ENSMUSG00000003934.5	1930.06	707.862	3.56156	1	1.44711
ENSMUSG00000004070.15	288.963	55.4603	3.08273	1	2.38136
ENSMUSG00000004558.15	538.986	2006.06	-3.04003	1	-1.89604
ENSMUSG00000005089.15	4664.67	27360.7	-4.38313	1	-2.55225
ENSMUSG00000005469.10	163.327	38.6776	2.06046	1	2.07819
ENSMUSG00000005609.16	786.935	67.9402	5.84292	1	3.53391
ENSMUSG00000005981.11	113.366	29.5792	1.78865	1	1.93833
ENSMUSG00000005982.14	48.9055	213.501	-2.35369	1	-2.12617
ENSMUSG00000006005.18	1427.34	790.043	1.95773	1	0.853322
ENSMUSG00000006403.13	1852.15	807.324	3.17369	1	1.19798
ENSMUSG00000006651.8	6756.4	3147.94	3.29493	1	1.10185
ENSMUSG00000006699.17	908.184	339.599	2.58636	1	1.41915
ENSMUSG00000006930.15	13.2224	258.183	-2.58735	1	-4.28734
ENSMUSG00000008734.9	2110.12	691.65	4.06358	1	1.60921
ENSMUSG00000010175.13	2180.78	852.152	3.62945	1	1.35566
ENSMUSG00000012422.14	256.63	34.7744	3.59692	1	2.88359
ENSMUSG00000012609.19	1379.98	705.057	1.88383	1	0.968841
ENSMUSG00000013076.17	20.5217	129.686	-2.66582	1	-2.6598
ENSMUSG00000013419.7	186.054	34.6458	2.43924	1	2.42497
ENSMUSG00000013593.12	241.311	34.0939	3.47493	1	2.82331
ENSMUSG00000014550.14	254.427	30.2625	3.12203	1	3.07165
ENSMUSG00000014599.10	555.964	214.822	1.76097	1	1.37185
ENSMUSG00000014846.12	379.576	34.0282	3.67973	1	3.47958
ENSMUSG00000014907.10	130.245	17.974	2.57197	1	2.85724
ENSMUSG00000015085.8	7.91301	64.776	-3.0709	1	-3.03316
ENSMUSG00000015087.14	332.201	94.9458	2.39684	1	1.80688
ENSMUSG00000015149.14	1970.72	1011.14	2.415	1	0.962747
ENSMUSG00000015341.17	1167.77	633.528	1.9124	1	0.882275
ENSMUSG00000015709.9	1181.34	562.755	2.39657	1	1.06984
ENSMUSG00000015714.11	2012.09	468.514	3.46775	1	2.10253
ENSMUSG00000015748.13	65.7608	17.1692	1.75486	1	1.9374
ENSMUSG00000015806.12	2952.11	1227.83	3.52689	1	1.26563
ENSMUSG00000015829.13	1690.49	3079.99	-2.60197	1	-0.865478
ENSMUSG00000015850.11	348.736	113.054	1.95894	1	1.62513
ENSMUSG00000016664.16	99.9947	31.5578	1.85083	1	1.66386
ENSMUSG00000016921.14	1082.66	463.999	2.46825	1	1.22239
ENSMUSG00000017132.17	933.373	340.736	2.42382	1	1.4538
ENSMUSG00000017466.9	708.072	206.354	2.52596	1	1.77877
ENSMUSG00000017493.12	32.6156	202.474	-2.36631	1	-2.63411
ENSMUSG00000017734.15	1438.28	878.459	1.84238	1	0.711302
ENSMUSG00000017802.14	320.101	59.0165	2.7941	1	2.43934
ENSMUSG00000018398.18	1819.84	1066.58	2.05787	1	0.770822
ENSMUSG00000018411.17	3410.02	1720.32	4.32903	1	0.987104
ENSMUSG00000018427.8	1743.2	796.016	2.78081	1	1.13087
ENSMUSG00000018428.15	101.674	20.3035	2.41342	1	2.32416
ENSMUSG00000018909.15	257.822	668.962	-2.6105	1	-1.37555
ENSMUSG00000018921.11	70.7945	13.7532	2.81844	1	2.36387
ENSMUSG00000019254.16	206.178	34.945	2.80621	1	2.56073
ENSMUSG00000019647.16	2127.19	964.382	4.00932	1	1.14127
ENSMUSG00000019726.12	491.291	184.001	1.82194	1	1.41686
ENSMUSG00000019883.11	143.131	37.2137	2.00916	1	1.94343
ENSMUSG00000019889.10	686.93	61.1961	3.71986	1	3.48865
ENSMUSG00000019996.17	3671.17	1537.89	3.64666	1	1.25529
ENSMUSG00000020032.14	357.724	60.8409	3.11194	1	2.55573
ENSMUSG00000020064.9	260.462	47.8498	3.10249	1	2.44449
ENSMUSG00000020099.8	1468.21	624.841	2.56815	1	1.2325
ENSMUSG00000020124.10	613.91	213.947	2.46377	1	1.52078
ENSMUSG00000020130.9	353.563	70.1667	2.75574	1	2.33311
ENSMUSG00000020183.11	871.357	45.962	4.92022	1	4.24475
ENSMUSG00000020189.15	292.79	122.667	1.92388	1	1.25512
ENSMUSG00000020326.7	265.454	52.9195	2.50342	1	2.32659
ENSMUSG00000020329.12	120.854	22.2362	2.49937	1	2.44228
ENSMUSG00000020349.4	1400.99	808.817	1.99983	1	0.79256
ENSMUSG00000020473.13	227.921	21.4858	3.00097	1	3.40708
ENSMUSG00000020486.19	5077.09	1662.99	6.01532	1	1.61022
ENSMUSG00000020570.15	1156.8	537.823	2.10567	1	1.10493
ENSMUSG00000020571.13	272.897	43.7457	2.54125	1	2.64114
ENSMUSG00000020604.13	580.93	36.1455	5.66543	1	4.00648
ENSMUSG00000020687.13	316.672	51.5003	3.17451	1	2.62034
ENSMUSG00000020694.17	345.179	44.453	3.8986	1	2.95699
ENSMUSG00000020718.12	41.2165	223.938	-2.72388	1	-2.44181
ENSMUSG00000020745.15	2738.06	1718.04	2.69548	1	0.672389
ENSMUSG00000020758.15	541.999	67.6055	3.68241	1	3.00308
ENSMUSG00000020811.16	1394.37	382.137	3.33567	1	1.86745
ENSMUSG00000020823.16	756.332	82.1646	4.13152	1	3.20243
ENSMUSG00000020831.18	26.8122	2.43644	2.75901	1	3.46005
ENSMUSG00000020918.14	166.94	24.0457	2.10314	1	2.79548
ENSMUSG00000020923.17	342.841	77.0079	3.10767	1	2.15446
ENSMUSG00000020950.10	43.8908	345.118	-2.95734	1	-2.9751
ENSMUSG00000020982.9	453.948	59.9568	3.64605	1	2.92053
ENSMUSG00000021012.16	134.912	483.79	-2.50661	1	-1.84236
ENSMUSG00000021097.15	3134.77	1559	3.60867	1	1.00774
ENSMUSG00000021143.10	4843.02	2080.25	5.44529	1	1.21915
ENSMUSG00000021188.14	806.925	429.471	2.08608	1	0.909871
ENSMUSG00000021196.14	216.049	608.337	-2.30077	1	-1.49352
ENSMUSG00000021270.13	5923.13	3676.21	2.55063	1	0.68814
ENSMUSG00000021379.2	120.064	634.08	-2.75353	1	-2.40086
ENSMUSG00000021420.13	20.1529	103.196	-2.47405	1	-2.35632
ENSMUSG00000021474.9	15.5048	246.043	-3.38511	1	-3.98812
ENSMUSG00000021573.15	4426.61	1747.62	4.86349	1	1.34081
ENSMUSG00000021589.13	577.749	47.8469	4.78249	1	3.59395
ENSMUSG00000021610.8	207.299	29.1006	3.10562	1	2.83259
ENSMUSG00000021660.14	449.766	122.532	2.79451	1	1.87601
ENSMUSG00000021703.9	3381.98	1893.4	1.88498	1	0.836888
ENSMUSG00000021706.14	516.522	41.5515	3.76746	1	3.63586
ENSMUSG00000021745.14	36.7653	603.547	-5.54109	1	-4.03705
ENSMUSG00000021750.16	219.177	1011.53	-4.75159	1	-2.20637
ENSMUSG00000021771.14	424.715	81.5596	3.09476	1	2.38057
ENSMUSG00000022037.15	540.98	2440.72	-6.62929	1	-2.17366
ENSMUSG00000022044.14	1911.35	461.988	4.75608	1	2.04867
ENSMUSG00000022048.8	5141.41	2939.27	3.21337	1	0.806705
ENSMUSG00000022051.15	1627.52	493.23	3.05281	1	1.72235
ENSMUSG00000022096.14	314.592	117.304	1.84146	1	1.42323
ENSMUSG00000022139.17	3829.15	2145.47	3.70433	1	0.835729
ENSMUSG00000022159.16	174.297	21.2619	3.76907	1	3.03521
ENSMUSG00000022197.16	26.3094	232.968	-2.44826	1	-3.14648
ENSMUSG00000022240.10	258.799	1056.95	-3.0838	1	-2.03
ENSMUSG00000022265.7	808.92	394.787	1.76087	1	1.03492
ENSMUSG00000022462.7	4225.22	2182.01	1.80497	1	0.95337
ENSMUSG00000022514.14	1404.97	678.901	1.95324	1	1.04926
ENSMUSG00000022558.16	171.589	56.395	1.83458	1	1.60532
ENSMUSG00000022634.9	160.262	32.6302	1.7725	1	2.29615
ENSMUSG00000022664.11	361.003	151.095	1.7767	1	1.25656
ENSMUSG00000022680.14	854.147	255.255	3.65899	1	1.74255
ENSMUSG00000022892.11	10061.7	5700.75	2.8565	1	0.819651
ENSMUSG00000022946.10	1226.13	715.338	2.48471	1	0.777415
ENSMUSG00000022964.14	240.576	37.6982	3.0268	1	2.67392
ENSMUSG00000023026.16	2446.9	1320.69	3.05415	1	0.88966
ENSMUSG00000023068.16	234.863	31.8163	3.18049	1	2.88398
ENSMUSG00000023075.9	339.558	75.3134	3.0795	1	2.17268
ENSMUSG00000023087.15	4451.17	2965.71	2.73649	1	0.585804
ENSMUSG00000023118.15	660.615	274.059	2.1052	1	1.26932
ENSMUSG00000023827.8	616.421	291.195	1.80746	1	1.08193
ENSMUSG00000023861.17	311.792	39.3109	2.97395	1	2.98758
ENSMUSG00000023913.17	193.847	709.544	-3.13521	1	-1.87197
ENSMUSG00000023953.9	75.8517	16.7492	2.05206	1	2.17909
ENSMUSG00000023961.16	1216.61	688.248	1.89763	1	0.821872
ENSMUSG00000024068.8	503.513	92.9141	3.2647	1	2.43806
ENSMUSG00000024070.15	933.386	438.141	1.87076	1	1.09108
ENSMUSG00000024073.16	2647.64	1649.54	3.18534	1	0.682643
ENSMUSG00000024077.15	2158.87	1370.21	2.09765	1	0.655876
ENSMUSG00000024135.10	153.407	20.49	2.96082	1	2.90437
ENSMUSG00000024187.15	392.709	97.8226	1.95615	1	2.00522
ENSMUSG00000024238.15	253.653	829.093	-3.07244	1	-1.70868
ENSMUSG00000024381.16	2458.46	1333.17	3.26954	1	0.882891
ENSMUSG00000024474.7	694.575	262.307	2.8743	1	1.40488
ENSMUSG00000024507.6	358.768	39.7807	4.13077	1	3.17291
ENSMUSG00000024561.11	178.757	37.0498	2.80154	1	2.27046
ENSMUSG00000024640.9	1669.48	637.598	2.75325	1	1.38868
ENSMUSG00000024782.7	676.162	318.493	2.0672	1	1.08611
ENSMUSG00000024810.16	2262.4	959.742	2.91616	1	1.23713
ENSMUSG00000024812.11	868.324	460.295	1.80291	1	0.915675
ENSMUSG00000024835.15	143.028	27.6957	2.67082	1	2.36856
ENSMUSG00000024853.10	623.514	63.9747	4.70024	1	3.28485
ENSMUSG00000024941.9	212.634	34.0721	2.67678	1	2.64171
ENSMUSG00000024944.6	164.948	18.7724	3.15067	1	3.13533
ENSMUSG00000024981.6	7.39621	60.2212	-2.5479	1	-3.02541
ENSMUSG00000025153.9	2683.76	1781.04	1.96231	1	0.591535
ENSMUSG00000025203.6	30605.2	14491.2	4.95232	1	1.0786
ENSMUSG00000025240.10	206.937	43.9904	2.59234	1	2.23393
ENSMUSG00000025410.10	629.855	201.559	2.40928	1	1.64382
ENSMUSG00000025503.5	776.55	194.42	2.65733	1	1.9979
ENSMUSG00000025580.15	173.042	36.7022	2.56681	1	2.23718
ENSMUSG00000025591.6	303.941	36.4168	2.80552	1	3.06112
ENSMUSG00000025597.13	727.877	370.727	1.88239	1	0.973335
ENSMUSG00000025616.14	462.138	168.066	2.07663	1	1.4593
ENSMUSG00000025742.5	214.595	31.6417	3.00969	1	2.76172
ENSMUSG00000025816.15	151.18	41.9755	2.07677	1	1.84865
ENSMUSG00000025858.12	179.004	21.9314	2.92937	1	3.02892
ENSMUSG00000025860.15	580.001	164.063	2.39836	1	1.82181
ENSMUSG00000025894.11	96.2052	19.3053	2.46074	1	2.31712
ENSMUSG00000025979.13	222.071	51.7845	2.52146	1	2.10043
ENSMUSG00000026021.15	172.095	31.5887	2.73108	1	2.44573
ENSMUSG00000026074.15	3085.54	2287.56	1.77495	1	0.431711
ENSMUSG00000026181.13	135.773	25.828	1.91599	1	2.39419
ENSMUSG00000026185.8	122.249	597.179	-2.44806	1	-2.28834
ENSMUSG00000026229.17	466.607	180.972	2.07316	1	1.36644
ENSMUSG00000026238.14	4707.46	3041.83	2.4103	1	0.630009
ENSMUSG00000026260.12	228.818	38.7231	2.50872	1	2.56293
ENSMUSG00000026280.17	126.997	41.4028	1.74911	1	1.617
ENSMUSG00000026385.16	594.192	206.274	2.53318	1	1.52636
ENSMUSG00000026421.14	3028.96	1503.05	2.78994	1	1.01093
ENSMUSG00000026473.16	7017.96	4475.68	4.42902	1	0.648945
ENSMUSG00000026482.13	30.2873	303.016	-3.08875	1	-3.32261
ENSMUSG00000026519.16	1922.27	736.968	2.98199	1	1.38314
ENSMUSG00000026587.15	138.672	709.143	-2.4792	1	-2.3544
ENSMUSG00000026594.14	26.2732	323.927	-2.56658	1	-3.624
ENSMUSG00000026618.11	169.295	33.5793	2.73027	1	2.33389
ENSMUSG00000026663.6	385.937	47.1906	3.85295	1	3.03179
ENSMUSG00000026664.7	119.645	22.562	1.76917	1	2.40679
ENSMUSG00000026718.17	616.541	186.726	2.48582	1	1.72327
ENSMUSG00000026790.19	69.0033	312.931	-2.35597	1	-2.18111
ENSMUSG00000026821.16	1537.86	693.899	2.63514	1	1.14813
ENSMUSG00000026827.12	429.76	58.6001	3.68865	1	2.87456
ENSMUSG00000026830.9	5724.83	2580.95	3.30765	1	1.14933
ENSMUSG00000026843.15	221.6	40.0574	2.75715	1	2.46782
ENSMUSG00000026860.16	150.467	32.4215	2.49721	1	2.21443
ENSMUSG00000026879.14	2053.17	744.179	2.62872	1	1.46413
ENSMUSG00000026888.14	442.016	111.24	2.4904	1	1.99042
ENSMUSG00000026926.14	232.743	37.8168	3.14648	1	2.62164
ENSMUSG00000026944.18	9050.09	4043.56	4.56438	1	1.16231
ENSMUSG00000027201.16	510.905	125.219	3.23317	1	2.02861
ENSMUSG00000027210.20	27.9693	307.897	-3.23638	1	-3.46054
ENSMUSG00000027238.17	839.634	358.772	2.51447	1	1.22669
ENSMUSG00000027298.17	1082.47	572.068	1.77671	1	0.920075
ENSMUSG00000027312.14	1638.74	836.71	2.47404	1	0.969787
ENSMUSG00000027339.15	1561.98	249.419	5.45106	1	2.64673
ENSMUSG00000027341.10	120.636	25.1482	1.9875	1	2.26213
ENSMUSG00000027367.16	219.155	50.3259	2.60394	1	2.12258
ENSMUSG00000027375.14	10677.4	3136.32	3.33672	1	1.76741
ENSMUSG00000027502.11	171.688	34.7738	2.79947	1	2.30371
ENSMUSG00000027522.15	282.753	54.76	2.77001	1	2.36835
ENSMUSG00000027577.14	3.92511	63.0958	-2.92144	1	-4.00674
ENSMUSG00000027680.15	634.776	148.312	3.20387	1	2.09761
ENSMUSG00000027706.8	873.039	300.395	2.9056	1	1.53918
ENSMUSG00000027858.13	10681.5	4649.15	3.07865	1	1.20008
ENSMUSG00000027882.18	1015.78	451.277	2.5278	1	1.17051
ENSMUSG00000027942.17	144.218	46.2801	2.06302	1	1.63979
ENSMUSG00000028059.16	1637.97	617.477	3.65904	1	1.40745
ENSMUSG00000028082.14	780.721	56.0678	5.76986	1	3.79956
ENSMUSG00000028093.15	83.3157	29.3065	1.75808	1	1.50737
ENSMUSG00000028096.13	166.844	22.6381	3.28844	1	2.88167
ENSMUSG00000028328.13	1273.04	636.859	2.5029	1	0.999226
ENSMUSG00000028385.14	1287.06	540.839	2.8432	1	1.25081
ENSMUSG00000028399.18	11448.9	5625.36	3.91052	1	1.0252
ENSMUSG00000028409.11	172.797	26.924	2.98497	1	2.68211
ENSMUSG00000028444.17	213.748	55.4051	2.59164	1	1.94782
ENSMUSG00000028517.8	717.007	2295.93	-2.62115	1	-1.67902
ENSMUSG00000028542.17	1202.2	67.1318	5.46477	1	4.16253
ENSMUSG00000028552.13	2885.13	1686.62	2.02686	1	0.774507
ENSMUSG00000028668.5	309.967	69.3346	2.69484	1	2.16047
ENSMUSG00000028677.19	954.885	514.29	1.92779	1	0.892744
ENSMUSG00000028680.14	293.796	44.9304	2.69615	1	2.70905
ENSMUSG00000028696.12	89.0527	7.85941	2.07209	1	3.50217
ENSMUSG00000028803.18	334.923	74.9074	3.05995	1	2.16065
ENSMUSG00000028832.11	1849.44	888.03	2.90859	1	1.05841
ENSMUSG00000028842.15	1484.76	454.131	3.20047	1	1.70905
ENSMUSG00000028843.8	116.768	15.5968	2.61317	1	2.90432
ENSMUSG00000028962.14	615.918	201.483	2.49501	1	1.61208
ENSMUSG00000028969.10	299.594	29.0529	4.26509	1	3.36625
ENSMUSG00000029148.15	146.981	36.4122	2.06319	1	2.01314
ENSMUSG00000029207.16	1117.81	271.654	3.84145	1	2.04083
ENSMUSG00000029221.15	416.96	88.9739	2.98445	1	2.22845
ENSMUSG00000029249.15	197.196	28.0009	2.03004	1	2.81609
ENSMUSG00000029263.15	100.907	21.6043	1.80576	1	2.22363
ENSMUSG00000029326.13	279.574	30.6453	3.53229	1	3.18949
ENSMUSG00000029397.15	150.287	32.5415	2.05779	1	2.20736
ENSMUSG00000029426.8	2104.94	798.744	3.65023	1	1.39797
ENSMUSG00000029474.7	134.685	31.0098	1.85218	1	2.11879
ENSMUSG00000029512.11	186.148	52.8997	2.41124	1	1.81512
ENSMUSG00000029617.10	183.489	31.8561	2.90342	1	2.52605
ENSMUSG00000029714.11	295.348	29.9732	2.72737	1	3.30067
ENSMUSG00000029781.7	29.5957	166.011	-2.54512	1	-2.48782
ENSMUSG00000029832.16	373.815	75.3394	3.20114	1	2.31085
ENSMUSG00000029833.17	597.271	230.444	1.90301	1	1.37397
ENSMUSG00000030168.13	666.682	178.379	2.09178	1	1.90205
ENSMUSG00000030245.10	123.29	19.4368	2.47416	1	2.6652
ENSMUSG00000030528.12	89.5855	15.7397	2.47573	1	2.50886
ENSMUSG00000030616.16	2682.17	928.413	3.07247	1	1.53056
ENSMUSG00000030662.10	627.807	173.716	2.76018	1	1.85359
ENSMUSG00000030685.5	571.034	140.19	2.92002	1	2.02619
ENSMUSG00000030738.11	885.701	330.925	2.39688	1	1.42032
ENSMUSG00000030739.18	814.01	121.668	4.75259	1	2.7421
ENSMUSG00000030802.14	131.517	25.7156	1.76754	1	2.35454
ENSMUSG00000030880.14	209.118	21.791	2.73211	1	3.26252
ENSMUSG00000030987.5	377.077	36.4761	3.05049	1	3.36984
ENSMUSG00000030994.16	892.459	482.946	1.83162	1	0.885923
ENSMUSG00000031202.5	153.37	22.8733	2.104	1	2.74528
ENSMUSG00000031226.13	90.7953	17.7157	2.47838	1	2.35759
ENSMUSG00000031385.14	2794.9	1315.66	2.73664	1	1.08701
ENSMUSG00000031425.15	140361	58736.4	3.08753	1	1.25682
ENSMUSG00000031434.15	73.3535	13.4044	1.9573	1	2.45216
ENSMUSG00000031447.7	2764.36	1591.11	1.84463	1	0.796908
ENSMUSG00000031483.8	431.242	39.5454	3.57392	1	3.44692
ENSMUSG00000031578.5	101.781	19.6997	1.89924	1	2.36922
ENSMUSG00000031583.13	248.497	34.146	3.11049	1	2.86344
ENSMUSG00000031605.8	2526.46	1036.18	3.82351	1	1.28585
ENSMUSG00000031617.16	320.891	47.5795	3.9824	1	2.75367
ENSMUSG00000031714.9	2815.26	1418.79	3.0522	1	0.98861
ENSMUSG00000031715.14	1007.78	189.864	4.61697	1	2.40815
ENSMUSG00000031729.6	468.474	90.1613	2.88855	1	2.37739
ENSMUSG00000031732.12	35.9262	233.424	-2.59856	1	-2.69985
ENSMUSG00000031765.8	487.005	1041.04	-2.6975	1	-1.09602
ENSMUSG00000031775.5	1156.44	458.464	2.60462	1	1.33482
ENSMUSG00000031833.10	1396.68	898.661	2.01882	1	0.636154
ENSMUSG00000031834.15	241.345	35.9484	2.58821	1	2.7471
ENSMUSG00000031918.16	1127.78	374.003	2.50848	1	1.59237
ENSMUSG00000031931.4	81.5416	11.9174	1.97731	1	2.77447
ENSMUSG00000031935.9	98.7205	17.0205	2.04049	1	2.53608
ENSMUSG00000031974.8	171.758	21.4148	3.02868	1	3.0037
ENSMUSG00000031988.10	136.565	35.7355	2.10197	1	1.93416
ENSMUSG00000031996.17	3206.41	2018.35	2.84526	1	0.667785
ENSMUSG00000032012.9	640.507	305.654	1.78618	1	1.06731
ENSMUSG00000032060.10	1832.87	830.025	2.54443	1	1.14288
ENSMUSG00000032064.17	1558.4	814.181	2.04262	1	0.936642
ENSMUSG00000032181.7	399.493	1392.26	-3.64636	1	-1.80118
ENSMUSG00000032212.10	774.94	361.342	2.03759	1	1.10072
ENSMUSG00000032328.12	1774.69	1005.9	1.84593	1	0.819081
ENSMUSG00000032349.13	834.38	402.194	2.03416	1	1.05281
ENSMUSG00000032410.13	469.725	110.556	2.56404	1	2.08704
ENSMUSG00000032497.19	213.724	33.0905	2.68579	1	2.69126
ENSMUSG00000032498.9	151.139	37.6654	1.88585	1	2.00456
ENSMUSG00000032580.12	1422.6	635.654	2.51688	1	1.16221
ENSMUSG00000032766.9	153.143	13.3171	2.7301	1	3.52353
ENSMUSG00000032854.12	7147.22	2806.41	3.20578	1	1.34866
ENSMUSG00000032902.1	847.431	357.556	2.41525	1	1.24493
ENSMUSG00000032905.5	166.119	31.3356	2.61445	1	2.40635
ENSMUSG00000033039.10	1718.84	506.702	4.43426	1	1.76222
ENSMUSG00000033047.5	297.069	32.574	4.00401	1	3.189
ENSMUSG00000033326.15	521.661	211.15	2.03537	1	1.30484
ENSMUSG00000033352.11	205.763	42.005	1.9345	1	2.29235
ENSMUSG00000033365.14	780.005	263.631	2.6854	1	1.56496
ENSMUSG00000033379.13	215.634	76.0826	1.91313	1	1.50295
ENSMUSG00000033577.18	4213.66	2836.94	2.72287	1	0.570736
ENSMUSG00000033579.16	2001.74	947.262	2.52022	1	1.07942
ENSMUSG00000033740.17	1298.79	662.206	1.95574	1	0.97182
ENSMUSG00000033769.16	2002.27	1233.97	2.10879	1	0.698338
ENSMUSG00000033918.16	162.54	20.901	2.74785	1	2.95916
ENSMUSG00000033949.12	631.79	286.122	2.06928	1	1.14281
ENSMUSG00000034152.6	393.638	87.536	2.82033	1	2.16892
ENSMUSG00000034190.9	307.681	35.003	2.88559	1	3.13589
ENSMUSG00000034206.15	49.3482	9.26822	1.83213	1	2.41263
ENSMUSG00000034275.18	90.2721	478.082	-2.52947	1	-2.40491
ENSMUSG00000034342.9	803.03	315.376	2.61236	1	1.34838
ENSMUSG00000034377.10	6423.51	3999.5	3.18174	1	0.683544
ENSMUSG00000034432.11	168.702	24.5461	2.88726	1	2.78091
ENSMUSG00000034543.15	232.585	65.5032	1.79394	1	1.82812
ENSMUSG00000034574.10	2956.69	1691.86	2.74321	1	0.805371
ENSMUSG00000034612.7	23.8213	314.546	-3.9631	1	-3.72295
ENSMUSG00000034648.9	1579.39	626.046	2.91149	1	1.33502
ENSMUSG00000035069.3	60.3774	12.7545	1.81924	1	2.243
ENSMUSG00000035152.14	722.127	201.638	3.30343	1	1.84048
ENSMUSG00000035342.14	441.816	90.4042	3.10104	1	2.28898
ENSMUSG00000035437.15	646.277	253.307	2.10172	1	1.35127
ENSMUSG00000035441.14	1459.54	443.42	3.07199	1	1.71877
ENSMUSG00000035770.8	1819.21	811.908	3.13362	1	1.16392
ENSMUSG00000035805.13	94.8257	370.147	-2.65595	1	-1.96475
ENSMUSG00000035969.15	614.542	199.245	2.83099	1	1.62497
ENSMUSG00000036095.11	74.8928	653.162	-3.0953	1	-3.12454
ENSMUSG00000036098.15	4133.55	1786.54	3.96769	1	1.21021
ENSMUSG00000036469.16	159.689	28.5132	2.82706	1	2.48556
ENSMUSG00000036503.13	3506.38	1512.3	3.07174	1	1.21323
ENSMUSG00000036529.17	2588.42	1276.79	3.25899	1	1.01956
ENSMUSG00000036565.7	120.857	581.696	-2.51127	1	-2.26697
ENSMUSG00000036634.15	6749.13	2762.39	3.7185	1	1.28879
ENSMUSG00000036745.15	6265.74	2992.81	4.21933	1	1.06599
ENSMUSG00000036955.16	397.892	79.4959	3.00741	1	2.32342
ENSMUSG00000036985.12	1128.35	671.328	1.76849	1	0.74913
ENSMUSG00000036989.16	423.222	90.2533	2.98451	1	2.22936
ENSMUSG00000037029.8	84.9283	20.9738	1.8024	1	2.01766
ENSMUSG00000037032.16	714.596	277.079	1.91812	1	1.36683
ENSMUSG00000037149.10	426.954	179.603	1.83754	1	1.24927
ENSMUSG00000037234.17	2075.25	997.214	2.53949	1	1.05731
ENSMUSG00000037236.16	1640.04	1089.03	1.8528	1	0.590688
ENSMUSG00000037242.8	2707.7	1386.53	2.61837	1	0.965591
ENSMUSG00000037280.12	933.231	358.454	2.53461	1	1.38044
ENSMUSG00000037355.14	144.013	29.6618	1.96723	1	2.27952
ENSMUSG00000037419.9	1862.84	835.082	1.93353	1	1.15751
ENSMUSG00000037605.16	315.128	895.544	-3.18415	1	-1.50683
ENSMUSG00000037625.7	7622.95	3178.06	3.32842	1	1.2622
ENSMUSG00000037669.15	176.758	26.8973	2.0026	1	2.71624
ENSMUSG00000037679.9	1667.63	682.782	2.79886	1	1.2883
ENSMUSG00000037685.15	4176.21	2511.94	3.20895	1	0.733388
ENSMUSG00000037706.17	3259.07	2017.01	1.96232	1	0.692241
ENSMUSG00000037720.16	790.926	364.065	2.01444	1	1.11935
ENSMUSG00000037736.20	2375.36	1476.65	2.58147	1	0.685819
ENSMUSG00000037754.13	3707.29	2011.94	2.95746	1	0.881779
ENSMUSG00000037824.6	382.489	124.003	2.07304	1	1.62504
ENSMUSG00000037852.8	889.823	4892.13	-2.47973	1	-2.45887
ENSMUSG00000037907.16	170.845	25.4763	2.10826	1	2.74546
ENSMUSG00000037989.15	60.9252	544.695	-4.56364	1	-3.16034
ENSMUSG00000038025.8	336.545	72.3646	2.7267	1	2.21745
ENSMUSG00000038058.14	162.966	13.0891	2.70878	1	3.63814
ENSMUSG00000038084.16	543.481	259.298	1.81007	1	1.06762
ENSMUSG00000038143.16	1462.99	841.903	2.56297	1	0.797189
ENSMUSG00000038264.8	249.723	28.3711	2.59968	1	3.13783
ENSMUSG00000038390.11	16.355	142.959	-3.14222	1	-3.12779
ENSMUSG00000038446.8	91.4207	349.207	-2.35891	1	-1.93349
ENSMUSG00000038495.14	1908.8	1159.45	1.93579	1	0.719234
ENSMUSG00000038518.15	402.559	177.26	1.84176	1	1.18334
ENSMUSG00000038526.14	495.546	202.903	1.82461	1	1.28822
ENSMUSG00000038608.15	5888.3	2857.1	4.55077	1	1.0433
ENSMUSG00000038633.5	834.328	233.808	2.72628	1	1.83529
ENSMUSG00000038668.14	2062.73	876.011	2.74229	1	1.23553
ENSMUSG00000038780.14	487.406	222.824	1.76377	1	1.12922
ENSMUSG00000038861.14	271.744	30.0439	3.58369	1	3.1771
ENSMUSG00000039047.17	175.049	36.088	2.03187	1	2.27817
ENSMUSG00000039205.16	58.5814	283.123	-2.72444	1	-2.27291
ENSMUSG00000039230.14	397.693	37.293	3.50592	1	3.41468
ENSMUSG00000039270.9	351.243	108.127	2.61795	1	1.69974
ENSMUSG00000039542.16	2959	2273.17	1.93333	1	0.380404
ENSMUSG00000039601.16	877.474	444.842	1.91988	1	0.980064
ENSMUSG00000039770.6	197.642	38.3834	2.52121	1	2.36433
ENSMUSG00000039809.10	144.932	646.658	-2.30685	1	-2.15762
ENSMUSG00000039840.8	454.028	165.074	2.03498	1	1.45966
ENSMUSG00000039901.10	142.301	38.1198	2.42753	1	1.90033
ENSMUSG00000040033.16	135.037	27.4302	2.03419	1	2.29952
ENSMUSG00000040044.11	291.112	76.5078	2.51606	1	1.9279
ENSMUSG00000040111.17	775.425	378.239	1.94	1	1.03569
ENSMUSG00000040128.9	810.394	414.973	1.81356	1	0.965605
ENSMUSG00000040250.14	73.2888	280.336	-2.60505	1	-1.9355
ENSMUSG00000040548.16	592.933	190.582	2.47781	1	1.63746
ENSMUSG00000040990.17	654.85	308.366	1.94008	1	1.08652
ENSMUSG00000041096.13	293.118	80.1827	1.89812	1	1.87012
ENSMUSG00000041205.8	927.899	388.691	2.75849	1	1.25534
ENSMUSG00000041303.7	175.09	22.4051	2.46505	1	2.9662
ENSMUSG00000041439.15	481.445	206.172	2.11772	1	1.22352
ENSMUSG00000041530.17	558.861	115.214	2.85532	1	2.27818
ENSMUSG00000041607.17	50367.8	32959.8	1.83404	1	0.611795
ENSMUSG00000041685.16	1003.98	518.704	1.99983	1	0.952749
ENSMUSG00000041720.14	720.135	227.291	2.70318	1	1.66373
ENSMUSG00000041765.6	115.331	16.6972	3.10638	1	2.78811
ENSMUSG00000041777.12	139.814	26.488	2.11843	1	2.40009
ENSMUSG00000041879.13	578.595	164.387	2.89951	1	1.81546
ENSMUSG00000041889.7	595.326	303.468	1.82003	1	0.972137
ENSMUSG00000041895.15	527.721	97.5596	3.2921	1	2.43542
ENSMUSG00000041997.16	362.409	130.889	1.7778	1	1.46928
ENSMUSG00000042015.17	181.007	24.0872	3.12632	1	2.90971
ENSMUSG00000042032.13	127.304	23.9943	2.68093	1	2.40751
ENSMUSG00000042055.13	324.438	46.3076	2.89453	1	2.80862
ENSMUSG00000042323.17	750.137	305.127	2.58169	1	1.29775
ENSMUSG00000042572.12	189.676	60.9556	2.01114	1	1.6377
ENSMUSG00000042605.16	842.411	287.191	2.87163	1	1.55251
ENSMUSG00000042662.16	286.581	30.4427	3.7057	1	3.23477
ENSMUSG00000042870.15	40.7442	188.718	-2.52894	1	-2.21157
ENSMUSG00000042903.8	157.368	27.3532	2.88867	1	2.52436
ENSMUSG00000043154.15	1937.79	1072.9	2.56264	1	0.852888
ENSMUSG00000043456.17	1391.44	863.333	1.8967	1	0.688585
ENSMUSG00000044098.14	286.567	44.45	3.19034	1	2.68862
ENSMUSG00000044340.7	4125.27	2139.86	2.97055	1	0.946974
ENSMUSG00000044452.10	172.366	27.0855	2.72046	1	2.66988
ENSMUSG00000044501.17	104.834	18.0901	2.07107	1	2.53483
ENSMUSG00000044876.15	101.3	19.3793	2.43434	1	2.38605
ENSMUSG00000044894.14	74.6939	21.3349	1.78109	1	1.80778
ENSMUSG00000045180.13	1084.55	362.292	2.49847	1	1.58186
ENSMUSG00000045404.16	199.692	22.7208	2.70252	1	3.13569
ENSMUSG00000045414.7	326.906	34.7969	3.10476	1	3.23185
ENSMUSG00000045427.13	426.382	46.8459	4.07093	1	3.18615
ENSMUSG00000045896.14	216.067	29.6103	3.09314	1	2.86731
ENSMUSG00000045917.17	110.347	12.8147	3.1115	1	3.10617
ENSMUSG00000045962.16	9752.77	5857.89	4.48244	1	0.735432
ENSMUSG00000046160.6	2197.26	1244.71	1.87221	1	0.819898
ENSMUSG00000046324.12	1016.54	61.6384	5.57587	1	4.04369
ENSMUSG00000046861.9	95.25	25.9439	1.93907	1	1.87632
ENSMUSG00000047216.8	488.277	40.8469	3.73879	1	3.5794
ENSMUSG00000047368.4	696.985	163.45	2.89894	1	2.09227
ENSMUSG00000047412.16	418.211	172.275	2.04385	1	1.27952
ENSMUSG00000047539.9	257.603	30.7447	3.15334	1	3.06674
ENSMUSG00000047731.17	270.804	86.6468	2.06661	1	1.64403
ENSMUSG00000047976.4	1190.77	479.358	3.09811	1	1.31271
ENSMUSG00000048022.11	1723.7	721.009	2.7966	1	1.25742
ENSMUSG00000048076.14	387.364	75.515	3.47662	1	2.35886
ENSMUSG00000048175.13	123.845	16.758	2.96785	1	2.88561
ENSMUSG00000048537.16	6845.79	2511.37	5.18163	1	1.44674
ENSMUSG00000049076.12	2121.12	1124.76	2.42419	1	0.915209
ENSMUSG00000049493.13	1106.16	391.461	3.23542	1	1.49862
ENSMUSG00000049807.16	3994.1	1400.98	5.06865	1	1.51143
ENSMUSG00000050148.9	664.956	174.054	3.11371	1	1.93373
ENSMUSG00000050697.9	137.662	36.2319	2.11366	1	1.9258
ENSMUSG00000051234.6	658.23	210.261	2.40114	1	1.64641
ENSMUSG00000052040.10	1267.39	429.813	3.10697	1	1.56008
ENSMUSG00000052544.9	530.333	114.046	3.00726	1	2.21728
ENSMUSG00000052609.9	1546.27	840.73	2.55557	1	0.879075
ENSMUSG00000053024.14	4789.95	1619.2	4.601	1	1.56473
ENSMUSG00000053141.16	129.951	739.096	-2.97299	1	-2.5078
ENSMUSG00000053398.11	524.642	210.374	1.85143	1	1.31837
ENSMUSG00000053510.12	1385.1	810.912	2.40994	1	0.772378
ENSMUSG00000053702.16	135.688	608.175	-3.06284	1	-2.1642
ENSMUSG00000054309.9	234.624	30.1066	2.79794	1	2.9622
ENSMUSG00000054364.5	3045.75	1750.87	2.05653	1	0.798728
ENSMUSG00000054619.7	226.575	27.5355	2.94952	1	3.04063
ENSMUSG00000054863.9	168.425	33.5746	2.7764	1	2.32666
ENSMUSG00000054942.13	310.775	86.7279	2.44441	1	1.8413
ENSMUSG00000055013.16	2245.16	1358.79	2.03611	1	0.724497
ENSMUSG00000055371.17	233.881	35.3553	2.84641	1	2.72578
ENSMUSG00000055373.8	226.245	975.636	-3.95346	1	-2.10846
ENSMUSG00000055421.8	4761.61	2976.97	3.37325	1	0.677604
ENSMUSG00000055717.13	2645.11	949.242	3.74314	1	1.47848
ENSMUSG00000055733.6	67.5585	23.4954	1.84589	1	1.52376
ENSMUSG00000055850.12	267.894	43.8365	1.87781	1	2.61146
ENSMUSG00000056201.8	1377.92	864.749	1.89059	1	0.672142
ENSMUSG00000056856.13	610.452	163.933	3.30669	1	1.89677
ENSMUSG00000056952.13	37.5016	145.383	-2.36232	1	-1.95483
ENSMUSG00000056966.7	2524.58	1261.27	2.9038	1	1.00116
ENSMUSG00000057101.8	135.767	29.6157	2.04793	1	2.1967
ENSMUSG00000057134.6	1802.5	604.139	3.47407	1	1.57705
ENSMUSG00000057335.11	1739.54	1221.29	1.78257	1	0.510298
ENSMUSG00000057337.13	110.462	30.0811	1.76725	1	1.87662
ENSMUSG00000057614.6	1601.51	849.451	1.97523	1	0.914832
ENSMUSG00000058070.14	1036.08	329.605	2.78176	1	1.65233
ENSMUSG00000058135.12	221.503	895.92	-2.91914	1	-2.01604
ENSMUSG00000058192.16	171.571	26.5363	1.83582	1	2.69276
ENSMUSG00000058254.12	534.013	2207.48	-5.48915	1	-2.04746
ENSMUSG00000058297.16	110.862	681.979	-3.67936	1	-2.62096
ENSMUSG00000058740.14	19.3826	183.812	-3.18292	1	-3.24539
ENSMUSG00000059208.15	780.471	326.061	2.64919	1	1.2592
ENSMUSG00000059409.9	55.9296	276.252	-2.5111	1	-2.3043
ENSMUSG00000059495.14	1665.6	965.219	2.63413	1	0.787117
ENSMUSG00000059810.18	560.642	116.86	2.50862	1	2.2623
ENSMUSG00000059974.10	159.085	721.458	-2.88128	1	-2.18112
ENSMUSG00000060012.9	3213.73	1070.36	4.23771	1	1.58616
ENSMUSG00000060739.8	355.395	47.2616	3.07269	1	2.91068
ENSMUSG00000060743.12	567.454	110.74	2.83238	1	2.35732
ENSMUSG00000060924.15	25.7858	350.506	-3.69879	1	-3.76479
ENSMUSG00000061080.11	336.389	1544.85	-2.67971	1	-2.19926
ENSMUSG00000061436.15	4201.16	2953.99	1.86346	1	0.508122
ENSMUSG00000061451.13	1636.75	604.036	3.33023	1	1.43813
ENSMUSG00000061479.15	93.6929	20.1704	2.09627	1	2.2157
ENSMUSG00000061559.15	74.0312	14.6789	1.97612	1	2.33439
ENSMUSG00000061666.6	114.044	20.7677	2.60508	1	2.45718
ENSMUSG00000061755.10	1153.4	717.119	1.95025	1	0.685603
ENSMUSG00000062070.12	398.89	60.7296	3.1887	1	2.71552
ENSMUSG00000062078.15	31245.8	21741	3.72573	1	0.523243
ENSMUSG00000062866.16	278.839	59.1198	2.10935	1	2.23772
ENSMUSG00000062929.8	739.003	361.483	1.94914	1	1.03165
ENSMUSG00000063077.15	12983.7	7480.95	4.84669	1	0.795405
ENSMUSG00000063146.11	864.467	463.631	1.82492	1	0.898834
ENSMUSG00000063297.7	467.99	1407.93	-3.16597	1	-1.58902
ENSMUSG00000063480.8	281.623	43.7862	2.63109	1	2.68522
ENSMUSG00000063760.9	10.0777	121.664	-2.32859	1	-3.59367
ENSMUSG00000064325.4	1182.96	392.322	2.82415	1	1.59229
ENSMUSG00000066113.16	376.287	153.783	1.78475	1	1.29093
ENSMUSG00000066129.15	3020.67	1282.92	4.40339	1	1.23544
ENSMUSG00000067851.11	632.074	142.601	3.74148	1	2.14811
ENSMUSG00000068580.11	50.1943	9.89871	1.98604	1	2.34221
ENSMUSG00000068739.13	322.632	40.1505	3.10784	1	3.0064
ENSMUSG00000068747.14	2749.05	1022.52	3.57433	1	1.4268
ENSMUSG00000068921.14	131.439	24.352	2.79381	1	2.43228
ENSMUSG00000069114.8	223.115	57.9722	1.89279	1	1.94435
ENSMUSG00000069670.8	995.662	365.645	2.53456	1	1.44521
ENSMUSG00000070372.11	366.631	46.1839	3.90023	1	2.98887
ENSMUSG00000070639.5	1239.25	757.287	1.98187	1	0.710554
ENSMUSG00000070733.13	3047.93	2022.62	2.80039	1	0.591605
ENSMUSG00000071649.6	76.8807	17.5434	1.83473	1	2.13169
ENSMUSG00000071856.10	67.2883	484.731	-3.68433	1	-2.84876
ENSMUSG00000073600.5	136.519	20.1556	3.03892	1	2.75985
ENSMUSG00000074093.4	458.457	63.0098	3.8976	1	2.86314
ENSMUSG00000074457.10	370.711	41.0499	4.31321	1	3.17485
ENSMUSG00000074513.9	189.078	39.0861	1.91739	1	2.27425
ENSMUSG00000074698.10	719.52	101.205	4.16019	1	2.82975
ENSMUSG00000074794.10	2766.9	952.115	3.74342	1	1.53906
ENSMUSG00000075232.6	1214.19	607.256	2.42654	1	0.999623
ENSMUSG00000075254.12	643.137	146.551	2.71498	1	2.13372
ENSMUSG00000075284.10	514.056	81.3932	3.21178	1	2.65895
ENSMUSG00000075289.5	322.873	23.0613	3.22813	1	3.80742
ENSMUSG00000075706.10	276.932	39.3445	2.7601	1	2.8153
ENSMUSG00000076432.13	3584.21	2018.82	2.06568	1	0.828145
ENSMUSG00000078656.11	79.8679	20.2804	1.9315	1	1.97753
ENSMUSG00000079215.8	678.367	200.732	2.66341	1	1.7568
ENSMUSG00000079316.10	108.72	26.3086	1.80951	1	2.04701
ENSMUSG00000079426.13	160.653	37.9718	1.95356	1	2.08095
ENSMUSG00000079435.9	171.086	36.2308	2.0927	1	2.23944
ENSMUSG00000081534.3	1002.83	482.708	2.05986	1	1.05485
ENSMUSG00000081974.3	62.3108	309.145	-2.49319	1	-2.31073
ENSMUSG00000084957.3	168.645	26.5497	2.89025	1	2.66723
ENSMUSG00000086583.3	336.649	54.429	2.57752	1	2.6288
ENSMUSG00000090015.8	137.086	44.0028	2.06189	1	1.63941
ENSMUSG00000090125.3	143.346	41.0593	1.91548	1	1.80372
ENSMUSG00000091712.2	1348.18	258.05	4.10425	1	2.38529
ENSMUSG00000092416.2	99.6837	17.0323	2.50613	1	2.54909
ENSMUSG00000092558.3	49.3581	197.24	-2.38193	1	-1.99859
ENSMUSG00000096002.2	2513.25	4817.18	-2.4655	1	-0.938635
ENSMUSG00000098374.1	157.239	28.0833	2.40207	1	2.48517
ENSMUSG00000102252.5	410.559	64.8229	2.60418	1	2.66302
ENSMUSG00000102543.5	24.3176	225.183	-2.70179	1	-3.21102
ENSMUSG00000102918.1	158.049	757.973	-4.38729	1	-2.26177
ENSMUSG00000106038.1	6.68485	58.5135	-2.62573	1	-3.1298
ENSMUSG00000112101.1	472.999	174.868	1.7662	1	1.43557
ENSMUSG00000112667.1	79.9495	454.585	-2.78662	1	-2.50739
ENSMUSG00000115987.1	86.371	21.0554	2.02951	1	2.03636
ENSMUSG00000117310.2	2323.4	1302.47	2.50783	1	0.834987
ENSMUSG00000002107.18	255.764	1329.3	-2.36962	1	-2.37779
ENSMUSG00000002679.14	17.6461	83.6786	-2.29556	1	-2.24551
ENSMUSG00000006782.16	9188.51	3730.01	3.36641	1	1.30065
ENSMUSG00000016409.4	251.199	19.3002	3.83433	1	3.70214
ENSMUSG00000018166.8	1027.35	350.918	3.34385	1	1.54972
ENSMUSG00000018848.4	30.4135	155.452	-2.41631	1	-2.35368
ENSMUSG00000020196.10	396.236	52.0597	3.38603	1	2.92812
ENSMUSG00000020231.15	3186.02	1733.97	3.34767	1	0.877679
ENSMUSG00000020740.13	119.209	340.666	-2.43128	1	-1.51486
ENSMUSG00000021794.16	546.854	1122.24	-2.71417	1	-1.03715
ENSMUSG00000022228.14	482.287	54.9922	3.84638	1	3.13259
ENSMUSG00000022338.8	434.311	926.413	-2.29376	1	-1.09293
ENSMUSG00000022425.16	11984.7	5073.56	3.31643	1	1.24012
ENSMUSG00000022494.15	21.2104	174.561	-2.33104	1	-3.04089
ENSMUSG00000022604.18	737.149	109.56	3.4875	1	2.75024
ENSMUSG00000023805.17	1455.52	461.36	3.83195	1	1.65757
ENSMUSG00000023977.15	1102.56	370.948	3.46029	1	1.57157
ENSMUSG00000024513.16	246.588	33.7989	3.46872	1	2.86705
ENSMUSG00000024597.11	8049.69	3332.66	4.30065	1	1.27226
ENSMUSG00000024974.10	765.155	241.426	3.34446	1	1.66417
ENSMUSG00000025133.9	255.746	43.4409	3.32276	1	2.55759
ENSMUSG00000025139.14	384.38	43.5156	3.34672	1	3.14293
ENSMUSG00000025352.6	14.3049	61.3899	-2.38812	1	-2.1015
ENSMUSG00000025666.16	174.96	694.892	-2.80326	1	-1.98977
ENSMUSG00000026604.17	11.4281	96.5188	-2.28779	1	-3.07822
ENSMUSG00000027598.16	1129.21	272.423	4.05552	1	2.0514
ENSMUSG00000027674.16	4273.52	1183.99	5.09496	1	1.85177
ENSMUSG00000027993.16	2788.41	1575.67	3.48797	1	0.823481
ENSMUSG00000028648.13	104.845	28.7257	1.90852	1	1.86785
ENSMUSG00000028782.14	129.085	746.599	-2.33145	1	-2.53201
ENSMUSG00000029462.18	304.66	33.0877	3.43825	1	3.20283
ENSMUSG00000029778.12	112.46	351.822	-2.32054	1	-1.64543
ENSMUSG00000030428.16	1164.98	2287.77	-2.9366	1	-0.973636
ENSMUSG00000030678.7	276.579	38.2883	3.33805	1	2.85272
ENSMUSG00000030774.13	2051.22	934.979	3.4429	1	1.13348
ENSMUSG00000031358.17	153.403	52.5713	1.73969	1	1.54498
ENSMUSG00000032026.7	199.878	20.0969	3.82033	1	3.31408
ENSMUSG00000032118.16	2182.75	611.89	3.55965	1	1.8348
ENSMUSG00000032412.8	1635.75	424.069	3.32028	1	1.94758
ENSMUSG00000032504.15	1205.73	341.924	3.35507	1	1.81816
ENSMUSG00000033392.16	5628.44	3083.38	3.46521	1	0.868222
ENSMUSG00000033763.14	439.315	1509.64	-3.41737	1	-1.78088
ENSMUSG00000034317.14	1732.81	811.601	3.50157	1	1.09427
ENSMUSG00000035093.16	5131.65	2464.74	3.48662	1	1.05799
ENSMUSG00000035181.6	542.505	47.5214	4.08487	1	3.51299
ENSMUSG00000035640.18	16.6922	244.267	-2.45975	1	-3.87121
ENSMUSG00000037172.14	1031.85	310.546	3.36664	1	1.73236
ENSMUSG00000037996.17	5216.11	2335.75	5.40456	1	1.15909
ENSMUSG00000040859.14	246.075	28.9613	3.5313	1	3.0869
ENSMUSG00000041762.16	786.766	163.512	3.49915	1	2.26654
ENSMUSG00000042404.16	321.017	38.2284	3.35295	1	3.06993
ENSMUSG00000042429.8	478.216	45.7623	4.6048	1	3.38543
ENSMUSG00000042496.18	57.4447	260.952	-2.3697	1	-2.18354
ENSMUSG00000044708.5	2819.7	1689.76	3.44638	1	0.738729
ENSMUSG00000044768.16	795.063	126.108	3.92301	1	2.6564
ENSMUSG00000048330.14	58.0785	378.458	-2.46003	1	-2.70406
ENSMUSG00000050199.13	95.1392	325.677	-2.31396	1	-1.77533
ENSMUSG00000052310.9	43.7901	214.76	-2.41064	1	-2.29405
ENSMUSG00000055447.19	1185.76	735.901	1.73978	1	0.688228
ENSMUSG00000055782.9	124.113	338.921	-2.29334	1	-1.4493
ENSMUSG00000060904.14	245.545	33.2055	3.33222	1	2.8865
ENSMUSG00000060961.16	660.317	1581.04	-2.87831	1	-1.25964
ENSMUSG00000067279.3	40.9446	224.234	-2.68067	1	-2.45326
ENSMUSG00000070572.7	2.0029	16.254	-2.69151	1	-3.02063
ENSMUSG00000071176.10	3362.82	1465.34	3.45784	1	1.19843
ENSMUSG00000071180.5	397.696	32.2471	3.92479	1	3.62442
ENSMUSG00000071650.6	425.017	51.5532	3.34796	1	3.04339
ENSMUSG00000072964.14	11.4357	152.281	-2.89669	1	-3.73513
ENSMUSG00000073680.2	3998.19	1736.87	4.40123	1	1.20286
ENSMUSG00000075415.13	7208.04	3154.64	4.05341	1	1.19213
ENSMUSG00000076439.12	2526.51	857.385	3.34669	1	1.55913
ENSMUSG00000019969.14	375.108	43.5002	3.4003	1	3.10821
ENSMUSG00000020458.16	9709.96	5777.92	3.42343	1	0.748914
ENSMUSG00000021779.17	13.8451	208.269	-2.31114	1	-3.911
ENSMUSG00000024163.17	1239.42	490.862	3.36896	1	1.33627
ENSMUSG00000024241.7	739.818	73.406	5.02019	1	3.3332
ENSMUSG00000024411.11	278.254	844.088	-2.31099	1	-1.60099
ENSMUSG00000024764.10	37.6046	188.588	-2.29126	1	-2.32626
ENSMUSG00000024924.14	1827.36	575.988	4.5143	1	1.66565
ENSMUSG00000025584.17	1680.72	601.132	4.28234	1	1.48332
ENSMUSG00000025728.16	450.265	54.2257	4.15183	1	3.05372
ENSMUSG00000026131.20	16231.6	10680.4	3.4506	1	0.603839
ENSMUSG00000026781.17	582.633	98.6039	3.36998	1	2.56287
ENSMUSG00000028525.16	2547	1205.04	3.43456	1	1.07971
ENSMUSG00000028927.6	774.757	354.184	2.12271	1	1.12925
ENSMUSG00000028995.14	441.001	43.3294	4.17181	1	3.34736
ENSMUSG00000029334.14	8.07942	94.3242	-2.34097	1	-3.54531
ENSMUSG00000029581.14	1497.81	924.119	1.73887	1	0.696702
ENSMUSG00000030064.16	1492.08	419.093	3.51711	1	1.83198
ENSMUSG00000032582.14	456.025	83.2305	3.44185	1	2.45393
ENSMUSG00000033713.12	2779.14	1479.43	3.39479	1	0.909596
ENSMUSG00000034235.17	2817.04	1078.33	3.42478	1	1.38539
ENSMUSG00000036026.15	384.886	57.1123	3.566	1	2.75256
ENSMUSG00000036046.14	2715.07	1045.44	4.0924	1	1.37688
ENSMUSG00000037692.14	182.09	57.8547	2.1234	1	1.65415
ENSMUSG00000038042.11	823.405	137.862	4.60433	1	2.57838
ENSMUSG00000039904.9	4510.35	1784.21	4.17094	1	1.33795
ENSMUSG00000042396.10	52.5041	287.898	-2.40298	1	-2.45506
ENSMUSG00000043969.4	5.52385	59.713	-2.40291	1	-3.4343
ENSMUSG00000058655.9	624.357	107.01	3.40561	1	2.54462
ENSMUSG00000067924.4	335.859	33.4757	3.78446	1	3.32667
ENSMUSG00000078584.9	246.395	43.4741	3.36874	1	2.50274
ENSMUSG00000002015.5	282.308	28.4463	4.08102	1	3.31095
ENSMUSG00000025375.15	4330.93	1968.55	5.01803	1	1.13754
ENSMUSG00000026249.10	284.486	1038.44	-4.07727	1	-1.86798
ENSMUSG00000026872.18	7262.43	4410.08	5.0603	1	0.719648
ENSMUSG00000038252.13	656.301	1429.91	-2.39305	1	-1.12349
ENSMUSG00000040249.15	1014.11	2799.6	-3.76995	1	-1.46501
ENSMUSG00000041073.10	611.307	47.0855	5.00101	1	3.69854
ENSMUSG00000070923.4	437.654	57.3477	3.79701	1	2.93198
ENSMUSG00000024899.7	9.78684	232.514	-3.30603	1	-4.57033
ENSMUSG00000027199.14	6485.2	2637.54	3.78741	1	1.29796
ENSMUSG00000029309.7	1755.44	7109.93	-4.05003	1	-2.018
ENSMUSG00000031517.8	400.153	2611.15	-3.37811	1	-2.70606
ENSMUSG00000045095.16	629.511	313.466	1.7374	1	1.00593
ENSMUSG00000060716.7	4426.72	421.783	8.16409	1	3.39167
ENSMUSG00000005360.14	968.759	4043.4	-3.50609	1	-2.06136
ENSMUSG00000020774.9	2204.58	760.692	5.23084	1	1.53512
ENSMUSG00000021508.11	19.4917	315.59	-5.00559	1	-4.01712
ENSMUSG00000022010.19	193.459	772.487	-3.3312	1	-1.99748
ENSMUSG00000038718.15	105.062	25.5631	2.12461	1	2.0391
ENSMUSG00000062591.5	11632.4	4096.72	6.11943	1	1.50561
ENSMUSG00000017390.15	377.47	1613.25	-4.10338	1	-2.09554
ENSMUSG00000018849.6	26.9149	314.348	-2.84382	1	-3.54588
ENSMUSG00000031523.16	48.6421	494.903	-3.43428	1	-3.34687
ENSMUSG00000039037.5	60.1355	291.948	-2.28504	1	-2.27942
ENSMUSG00000019872.13	15.7869	205.694	-3.36977	1	-3.7037
ENSMUSG00000021709.14	7595.74	3394.86	6.98939	1	1.16184
ENSMUSG00000031529.5	1375.34	859.968	2.12542	1	0.677431
ENSMUSG00000056476.13	44.8196	491.804	-4.54562	1	-3.45588
ENSMUSG00000020598.16	259.946	1229.12	-3.31213	1	-2.24134
ENSMUSG00000029629.17	126.876	588.039	-3.5748	1	-2.21249
ENSMUSG00000032413.12	185.83	846.056	-3.59094	1	-2.18677
ENSMUSG00000055254.15	766.94	3482.33	-5.28107	1	-2.18287
ENSMUSG00000024109.18	771.533	3133.14	-6.16699	1	-2.02181
ENSMUSG00000026442.14	10419.8	6768.67	2.12636	1	0.622388
ENSMUSG00000079557.11	207.298	35.3076	2.38852	1	2.55366
ENSMUSG00000027411.17	121.607	17.7107	2.38773	1	2.77954
ENSMUSG00000020044.13	286.762	937.265	-3.80197	1	-1.7086
ENSMUSG00000033904.16	4871.63	2096.21	6.42885	1	1.21662
ENSMUSG00000045136.6	112.952	711.311	-3.8166	1	-2.65478
ENSMUSG00000024044.19	3194.03	1460.9	6.36947	1	1.12852
ENSMUSG00000041329.13	718.887	2048.49	-3.79089	1	-1.51072
ENSMUSG00000026259.14	18.408	358.222	-4.23569	1	-4.28245
ENSMUSG00000028015.3	175.541	33.9679	2.12833	1	2.36956
ENSMUSG00000067786.16	46.9294	565.92	-4.19797	1	-3.59203
ENSMUSG00000032913.13	403.625	114.692	2.38648	1	1.81525
ENSMUSG00000026374.14	258.949	55.7529	2.3858	1	2.21555
ENSMUSG00000073982.11	792.27	306.947	2.12956	1	1.368
ENSMUSG00000024413.14	2851.09	1573.35	2.38561	1	0.857676
ENSMUSG00000078771.10	1342.56	583.213	1.73194	1	1.20289
ENSMUSG00000007097.14	1689.39	5142.26	-5.66702	1	-1.6059
ENSMUSG00000048960.13	304.236	1939.98	-5.69236	1	-2.67277
ENSMUSG00000020640.10	1246.71	673.394	2.38286	1	0.8886
ENSMUSG00000030256.11	436.577	103.608	2.38266	1	2.0751
ENSMUSG00000003452.15	930.801	457.902	2.13269	1	1.02343
ENSMUSG00000030681.18	173.769	33.961	2.13317	1	2.35522
ENSMUSG00000018559.16	127.537	24.2757	2.13323	1	2.39333
ENSMUSG00000052698.15	476.887	177.263	2.13661	1	1.42775
ENSMUSG00000069014.4	67.2556	422.929	-2.27244	1	-2.65269
ENSMUSG00000025810.9	82.8121	17.2653	2.13679	1	2.26196
ENSMUSG00000024661.7	19494.4	13115.8	1.72223	1	0.571753
ENSMUSG00000040652.16	24.9175	138.502	-2.26909	1	-2.47467
ENSMUSG00000008035.12	423.808	114.449	2.14054	1	1.88871
ENSMUSG00000033569.17	145.054	579.367	-2.2685	1	-1.99788
ENSMUSG00000024712.9	146.208	29.1031	2.14172	1	2.32878
ENSMUSG00000029554.15	115.201	25.3434	2.37318	1	2.18447
ENSMUSG00000031467.10	180.228	50.9016	1.71977	1	1.82404
ENSMUSG00000029587.16	152.545	29.3969	1.71913	1	2.3755
ENSMUSG00000026356.15	310.657	72.8731	2.37066	1	2.09187
ENSMUSG00000028233.6	53.426	233.128	-2.26291	1	-2.12551
ENSMUSG00000026737.12	1703.17	913.762	1.71508	1	0.898332
ENSMUSG00000004285.12	61.5953	17.9784	1.7138	1	1.77655
ENSMUSG00000032977.9	64.6249	12.8311	1.713	1	2.33245
ENSMUSG00000034075.10	180.537	64.6426	1.71289	1	1.48174
ENSMUSG00000075590.4	1872.67	975.17	2.14877	1	0.941371
ENSMUSG00000022358.7	782.763	359.281	2.3659	1	1.12346
ENSMUSG00000033009.15	119.067	28.5503	2.14946	1	2.06019
ENSMUSG00000025978.14	289.995	81.0294	2.36357	1	1.83951
ENSMUSG00000039533.8	195.015	534.635	-2.25623	1	-1.45497
ENSMUSG00000038612.16	726.25	324.314	1.70849	1	1.16307
ENSMUSG00000017009.3	103.713	363.06	-2.2554	1	-1.80761
ENSMUSG00000020132.10	683.045	282.438	2.15478	1	1.27405
ENSMUSG00000070047.14	2094.83	1360.8	2.35993	1	0.622378
ENSMUSG00000020100.15	778.252	409.92	1.70593	1	0.924896
ENSMUSG00000033161.10	1208.07	633.662	1.70582	1	0.930918
ENSMUSG00000036698.11	454.463	195.724	1.7046	1	1.21535
ENSMUSG00000032666.16	182.954	42.2936	2.15765	1	2.11297
ENSMUSG00000032537.15	886.919	486.843	2.15895	1	0.865347
ENSMUSG00000015176.11	213.673	65.3846	1.7016	1	1.70838
ENSMUSG00000030201.15	951.444	498.235	2.1613	1	0.933293
ENSMUSG00000069769.13	521.322	1345.97	-2.24795	1	-1.3684
ENSMUSG00000021385.10	297.418	120.818	1.69947	1	1.29965
ENSMUSG00000074340.9	28.9144	121.832	-1.78343	1	-2.07504
ENSMUSG00000026626.11	1271.35	1807.54	-1.78345	1	-0.507667
ENSMUSG00000026918.16	56.478	167.048	-1.77724	1	-1.5645
ENSMUSG00000033967.4	15.1107	84.6838	-1.77722	1	-2.48651
ENSMUSG00000021846.9	145.307	38.7674	2.16309	1	1.90619
ENSMUSG00000024480.9	19.422	139.687	-2.2453	1	-2.84643
ENSMUSG00000033917.15	655.64	204.883	2.35028	1	1.6781
ENSMUSG00000026207.16	51.847	287.242	-1.78625	1	-2.46993
ENSMUSG00000045671.17	75.3088	230.55	-1.78632	1	-1.61419
ENSMUSG00000022770.17	2179.62	1173.3	2.16494	1	0.893502
ENSMUSG00000069237.8	163.688	41.0366	2.16496	1	1.99597
ENSMUSG00000026384.13	305.302	781.758	-2.24463	1	-1.35649
ENSMUSG00000030849.18	3102.4	1628.57	2.34954	1	0.929777
ENSMUSG00000022043.19	694.463	270.073	2.34932	1	1.36255
ENSMUSG00000049100.15	803.003	1647.65	-2.24367	1	-1.03693
ENSMUSG00000033228.8	1128.79	653.734	1.69531	1	0.788006
ENSMUSG00000039913.12	787.891	369.96	2.16619	1	1.09062
ENSMUSG00000040606.13	1404.59	840.873	2.16646	1	0.740187
ENSMUSG00000048758.14	241.842	37.9434	2.34824	1	2.67215
ENSMUSG00000057716.7	1286.59	673.835	2.34794	1	0.933088
ENSMUSG00000037885.18	51.5222	180.383	-1.77169	1	-1.8078
ENSMUSG00000026511.7	130.336	30.3421	2.34701	1	2.10284
ENSMUSG00000027984.8	244.724	68.8002	2.34694	1	1.83067
ENSMUSG00000054008.9	650.321	294.108	2.16823	1	1.14481
ENSMUSG00000068923.14	5858.04	3681.46	2.3468	1	0.67014
ENSMUSG00000026915.16	279.563	1001.34	-1.77139	1	-1.84068
ENSMUSG00000048707.9	803.937	359.206	1.69215	1	1.16227
ENSMUSG00000039285.12	283.974	86.007	2.34464	1	1.72323
ENSMUSG00000031513.8	128.493	29.3892	2.3443	1	2.12832
ENSMUSG00000020333.17	262.65	541.248	-1.79293	1	-1.04315
ENSMUSG00000022110.13	135.65	37.8494	1.69018	1	1.84154
ENSMUSG00000028646.16	281.615	84.0729	2.17182	1	1.74401
ENSMUSG00000029577.13	70.029	328.114	-1.79386	1	-2.22817
ENSMUSG00000038384.16	303.679	92.1435	2.34275	1	1.72059
ENSMUSG00000034168.7	37.6524	143.849	-1.794	1	-1.93374
ENSMUSG00000031342.17	9198.65	5878.75	2.1733	1	0.645912
ENSMUSG00000025812.18	576.686	190.853	2.17381	1	1.59532
ENSMUSG00000027253.15	407.509	180.012	1.68694	1	1.17874
ENSMUSG00000027679.13	75.317	19.1704	1.68638	1	1.97409
ENSMUSG00000049517.8	249.105	59.6711	1.68577	1	2.06165
ENSMUSG00000023460.13	104.682	34.0694	1.68573	1	1.61947
ENSMUSG00000009090.17	262.672	52.0858	2.17722	1	2.3343
ENSMUSG00000028639.14	474.627	161.839	2.17747	1	1.55224
ENSMUSG00000032443.17	5.50456	28.8997	-1.76213	1	-2.39235
ENSMUSG00000066643.12	86.8253	27.5871	1.68412	1	1.65412
ENSMUSG00000020650.15	115.43	36.0157	1.68403	1	1.68032
ENSMUSG00000041362.17	1355.85	673.91	2.17813	1	1.00857
ENSMUSG00000030521.11	35.6124	123.319	-1.76113	1	-1.79194
ENSMUSG00000032462.14	54.4244	196.342	-2.23022	1	-1.85105
ENSMUSG00000030275.6	1833.97	1217.77	1.68157	1	0.590727
ENSMUSG00000006362.16	10.7171	73.7049	-1.75949	1	-2.78184
ENSMUSG00000030310.10	1050.92	1929.38	-1.80241	1	-0.876492
ENSMUSG00000039156.19	47.1221	263.937	-2.22835	1	-2.48572
ENSMUSG00000025337.10	342.948	58.1148	2.33319	1	2.56101
ENSMUSG00000078532.9	514.761	181.223	2.18248	1	1.50614
ENSMUSG00000034210.14	1871.46	1011.03	2.18265	1	0.888337
ENSMUSG00000029213.11	192.332	38.097	2.33148	1	2.33585
ENSMUSG00000028289.12	8.59169	106.576	-1.75546	1	-3.63279
ENSMUSG00000071793.12	272.031	64.5125	2.18432	1	2.07612
ENSMUSG00000031357.3	154.147	27.8144	2.18442	1	2.4704
ENSMUSG00000069170.14	87.5524	239.55	-1.75484	1	-1.45211
ENSMUSG00000000134.17	40.8906	139.937	-1.75452	1	-1.77494
ENSMUSG00000063455.16	92.4614	417.815	-2.22418	1	-2.17594
ENSMUSG00000005615.15	312.274	92.8495	2.32865	1	1.74985
ENSMUSG00000071660.10	119.057	26.5631	2.32845	1	2.16416
ENSMUSG00000026123.11	298.105	53.2446	2.18664	1	2.48512
ENSMUSG00000006057.15	111.961	35.9532	1.67505	1	1.63881
ENSMUSG00000009079.16	1018.16	553.391	1.67501	1	0.879595
ENSMUSG00000026842.16	1265.57	664.734	2.32826	1	0.928933
ENSMUSG00000021375.11	1324.69	745.971	2.18721	1	0.828467
ENSMUSG00000020696.18	602.347	314.96	1.67307	1	0.935427
ENSMUSG00000034981.9	129.936	38.8242	1.67307	1	1.74278
ENSMUSG00000030556.13	245.392	105.35	1.67292	1	1.21989
ENSMUSG00000033624.10	132.235	24.5092	2.32548	1	2.43171
ENSMUSG00000042390.9	852.702	518.556	1.67151	1	0.717541
ENSMUSG00000032422.18	351.582	73.6539	2.32452	1	2.25503
ENSMUSG00000020962.14	939.632	464.298	2.32434	1	1.01704
ENSMUSG00000043323.17	110.612	318.664	-1.81214	0.999999	-1.52654
ENSMUSG00000038145.17	172.894	433.528	-1.74868	0.999999	-1.32624
ENSMUSG00000059146.12	150.878	713.936	-2.07763	0.999999	-2.24241
ENSMUSG00000029141.16	136.261	27.2145	2.32327	0.999999	2.32392
ENSMUSG00000003545.3	1300.29	2767.25	-2.0796	0.999999	-1.08962
ENSMUSG00000036299.5	210.54	55.4788	2.19225	0.999999	1.92409
ENSMUSG00000032841.15	718.41	257.403	2.32267	0.999999	1.48078
ENSMUSG00000027384.6	43.8661	13.0396	1.66935	0.999999	1.75021
ENSMUSG00000003200.10	126.154	22.0157	2.32184	0.999999	2.51858
ENSMUSG00000034480.18	292.456	118.723	1.66776	0.999999	1.30062
ENSMUSG00000041220.10	909.821	347.348	2.3207	0.999999	1.3892
ENSMUSG00000022800.14	60.8414	232.466	-2.07248	0.999999	-1.93389
ENSMUSG00000024665.8	199.027	561.608	-2.08432	0.999999	-1.4966
ENSMUSG00000046404.5	205.51	29.3622	2.31998	0.999999	2.80718
ENSMUSG00000031708.17	500.385	240.596	1.66653	0.999999	1.05643
ENSMUSG00000040265.16	2304.6	1463.8	1.66565	0.999999	0.654794
ENSMUSG00000030603.16	166.511	36.2532	2.3189	0.999999	2.19944
ENSMUSG00000040325.16	92.7761	352.861	-2.08564	0.999999	-1.92727
ENSMUSG00000058454.15	230.405	79.3841	1.6653	0.999998	1.53725
ENSMUSG00000027959.14	187.188	44.7965	2.31791	0.999998	2.06303
ENSMUSG00000000827.18	184.788	30.8303	2.31775	0.999998	2.58345
ENSMUSG00000025958.14	167.643	504.121	-2.21338	0.999998	-1.58838
ENSMUSG00000033595.7	2175.7	1146.64	2.19752	0.999998	0.924068
ENSMUSG00000036192.15	157.59	494.458	-2.08717	0.999998	-1.64967
ENSMUSG00000022957.20	382.484	865.939	-2.21284	0.999998	-1.17887
ENSMUSG00000042751.14	33.2842	262.771	-1.74137	0.999998	-2.9809
ENSMUSG00000058997.8	241.413	104.381	1.66336	0.999998	1.20964
ENSMUSG00000020720.13	157.951	31.6111	2.31615	0.999998	2.32098
ENSMUSG00000002475.16	163.324	422.102	-2.06795	0.999998	-1.36985
ENSMUSG00000032288.9	67.4668	12.2521	2.31539	0.999997	2.46115
ENSMUSG00000027551.15	99.2652	12.8361	2.31521	0.999997	2.95109
ENSMUSG00000018433.14	31.5924	98.0755	-1.94457	0.999997	-1.63431
ENSMUSG00000035517.17	188.125	43.7716	2.19987	0.999997	2.10362
ENSMUSG00000027544.16	27.702	152.134	-1.9413	0.999997	-2.45728
ENSMUSG00000062257.13	222.511	846.885	-2.08966	0.999997	-1.92829
ENSMUSG00000022623.17	42.85	443.579	-2.2104	0.999997	-3.37182
ENSMUSG00000020589.17	36.0312	310.694	-1.94601	0.999997	-3.10818
ENSMUSG00000069539.11	61.1508	224.716	-2.06636	0.999997	-1.87766
ENSMUSG00000060227.15	194.866	568.907	-2.06633	0.999997	-1.54571
ENSMUSG00000046020.13	44.367	142.615	-1.82209	0.999996	-1.68457
ENSMUSG00000020135.13	221.246	503.158	-1.73851	0.999996	-1.18536
ENSMUSG00000022864.14	747.801	419.912	1.66001	0.999996	0.832568
ENSMUSG00000026082.11	139.592	35.5766	2.3119	0.999995	1.97221
ENSMUSG00000022476.8	35.1185	147.365	-2.09243	0.999995	-2.06909
ENSMUSG00000024614.7	427.531	149.998	2.20346	0.999995	1.51109
ENSMUSG00000050840.8	405.02	179.613	1.6585	0.999995	1.1731
ENSMUSG00000009863.14	138.93	26.9903	2.20416	0.999994	2.36385
ENSMUSG00000037210.16	372.204	122.663	2.3108	0.999994	1.60139
ENSMUSG00000051285.17	527.301	987.23	-1.93412	0.999992	-0.904759
ENSMUSG00000024487.5	53.1473	199.98	-2.20529	0.999992	-1.91179
ENSMUSG00000055675.6	125.891	352.646	-1.95266	0.999992	-1.48605
ENSMUSG00000079469.10	38.209	113.465	-1.42004	0.999992	-1.57026
ENSMUSG00000031144.15	60.8734	466.303	-1.41964	0.999992	-2.93738
ENSMUSG00000056124.5	111.127	312.313	-1.42362	0.999991	-1.49079
ENSMUSG00000078350.11	121.526	13.8604	2.30839	0.999991	3.13223
ENSMUSG00000040731.13	975.574	528.383	2.20679	0.999991	0.884667
ENSMUSG00000032285.15	96.9287	15.7721	2.30813	0.999991	2.61955
ENSMUSG00000004535.12	771.072	1192.56	-1.4252	0.99999	-0.629124
ENSMUSG00000063887.13	156.288	540.693	-2.09646	0.99999	-1.79061
ENSMUSG00000024780.7	3488.32	2596.88	1.65442	0.999989	0.425753
ENSMUSG00000031078.15	111.347	253.678	-1.41607	0.999989	-1.18794
ENSMUSG00000113795.1	979.633	1664.24	-1.41597	0.999989	-0.764549
ENSMUSG00000029407.10	130.582	370.811	-2.09687	0.999989	-1.50573
ENSMUSG00000029754.13	23.0776	78.0828	-1.41588	0.999989	-1.75851
ENSMUSG00000031441.15	2267.89	1188.34	2.30601	0.999987	0.932403
ENSMUSG00000017740.17	39.7298	489.267	-1.4276	0.999987	-3.62233
ENSMUSG00000033720.12	176.747	513.555	-2.09794	0.999987	-1.53883
ENSMUSG00000032601.13	48.5032	159.54	-2.098	0.999987	-1.71776
ENSMUSG00000032036.15	66.1995	211.352	-2.09881	0.999985	-1.67475
ENSMUSG00000020922.11	119.594	34.58	1.65195	0.999984	1.79013
ENSMUSG00000028430.14	141.035	49.6592	1.65146	0.999983	1.50591
ENSMUSG00000020331.9	1094.32	430.488	2.30417	0.999983	1.34599
ENSMUSG00000072235.6	2256.59	1419.03	2.30406	0.999983	0.669233
ENSMUSG00000045973.18	510.364	279.001	1.65089	0.999982	0.871255
ENSMUSG00000057363.12	33.0283	98.4009	-1.43019	0.999982	-1.57497
ENSMUSG00000026223.15	323.805	601.165	-1.41171	0.999982	-0.892635
ENSMUSG00000055320.18	45.4574	224.805	-1.92822	0.999981	-2.30609
ENSMUSG00000038349.10	1777.73	978.278	2.30331	0.999981	0.861723
ENSMUSG00000035469.17	1695.87	992.126	2.30322	0.999981	0.773434
ENSMUSG00000025735.13	7.65106	36.6367	-1.43069	0.999981	-2.25956
ENSMUSG00000074785.5	28.431	144.81	-1.72744	0.999979	-2.34863
ENSMUSG00000040209.12	695.147	394.011	1.5415	0.999978	0.819082
ENSMUSG00000037902.18	604.445	1101.82	-1.56738	0.999978	-0.866209
ENSMUSG00000022702.16	169.914	59.0228	1.53737	0.999978	1.52546
ENSMUSG00000019820.11	285.517	685.727	-1.40996	0.999977	-1.26406
ENSMUSG00000040028.10	440.744	216.862	1.54234	0.999977	1.02316
ENSMUSG00000090862.3	206.051	75.0966	1.53681	0.999977	1.45619
ENSMUSG00000029245.16	205.063	712.738	-1.56395	0.999977	-1.7973
ENSMUSG00000053644.13	114.725	293.392	-1.56392	0.999977	-1.35464
ENSMUSG00000042156.16	214.749	485.984	-1.43205	0.999977	-1.17826
ENSMUSG00000027167.11	65.5948	23.5887	1.54309	0.999976	1.47548
ENSMUSG00000079056.12	35.1137	125.607	-1.40929	0.999976	-1.83882
ENSMUSG00000052833.9	22.3861	103.271	-1.40922	0.999976	-2.20576
ENSMUSG00000039477.16	412.919	697.029	-1.40919	0.999976	-0.755359
ENSMUSG00000032135.15	915.327	536.447	1.54351	0.999975	0.770852
ENSMUSG00000059772.12	1829.68	2893.72	-1.4328	0.999974	-0.661337
ENSMUSG00000001844.10	24.0945	84.731	-1.72582	0.999974	-1.81418
ENSMUSG00000001761.7	30.9955	94.2428	-1.562	0.999974	-1.60432
ENSMUSG00000002984.17	54.01	11.5057	1.54483	0.999973	2.23087
ENSMUSG00000026617.16	221.72	76.7064	1.54506	0.999972	1.53132
ENSMUSG00000032281.11	132.374	387.057	-2.05317	0.999972	-1.54793
ENSMUSG00000094531.3	7.63874	27.4251	-1.56095	0.999972	-1.84409
ENSMUSG00000070327.14	341.632	79.8337	1.64763	0.999971	2.09737
ENSMUSG00000028608.15	181.869	77.5456	1.54588	0.99997	1.22978
ENSMUSG00000055538.7	920.682	588.311	1.533	0.999969	0.646124
ENSMUSG00000040234.16	583.953	292.855	1.54625	0.999969	0.995663
ENSMUSG00000020134.13	362.695	653.31	-1.43427	0.999968	-0.849009
ENSMUSG00000041258.18	344.681	166.726	1.53267	0.999968	1.04778
ENSMUSG00000037674.15	218.32	523.66	-2.10391	0.999968	-1.26218
ENSMUSG00000027221.5	54.5534	215.251	-2.10412	0.999967	-1.98028
ENSMUSG00000000711.3	329.566	168.398	1.54697	0.999967	0.968691
ENSMUSG00000001419.17	237.704	533.263	-1.43489	0.999965	-1.16568
ENSMUSG00000039701.11	245.924	514.913	-1.72362	0.999965	-1.06611
ENSMUSG00000051375.15	150.594	497.424	-2.10466	0.999965	-1.72381
ENSMUSG00000017631.19	330.398	772.142	-1.55855	0.999964	-1.22466
ENSMUSG00000109597.1	26.4303	85.8387	-1.57438	0.999964	-1.69943
ENSMUSG00000049612.10	1372.11	718.976	1.64574	0.999962	0.93238
ENSMUSG00000040687.16	136.244	365.468	-1.43561	0.999962	-1.42355
ENSMUSG00000033184.14	1209.66	726.879	1.54842	0.99996	0.734817
ENSMUSG00000036225.15	29.7151	112.797	-1.55717	0.999959	-1.92446
ENSMUSG00000034484.8	214.617	45.0168	2.21792	0.999957	2.25323
ENSMUSG00000033991.9	238.714	47.2748	2.21809	0.999957	2.33614
ENSMUSG00000037703.14	58.7723	216.595	-1.43665	0.999956	-1.88179
ENSMUSG00000078515.4	82.3208	320.034	-2.19395	0.999956	-1.9589
ENSMUSG00000036779.12	308.859	93.0731	2.21858	0.999954	1.73051
ENSMUSG00000004317.14	305.286	123.694	1.52932	0.999953	1.30339
ENSMUSG00000074102.4	82.1448	26.8909	1.52932	0.999953	1.61105
ENSMUSG00000032503.18	33.8007	599.416	-2.10694	0.999951	-4.14843
ENSMUSG00000026213.15	70.7894	20.8313	1.55026	0.999951	1.76478
ENSMUSG00000035311.16	1069.57	509.838	2.29585	0.999951	1.06892
ENSMUSG00000032777.9	666.021	362.955	1.52895	0.999951	0.875775
ENSMUSG00000021302.10	201.526	56.7916	2.29574	0.99995	1.82722
ENSMUSG00000028278.14	14.8628	199.537	-1.72046	0.999948	-3.74688
ENSMUSG00000032009.8	673.938	1329.6	-2.10783	0.999946	-0.980301
ENSMUSG00000029427.11	197.277	64.1771	1.64285	0.999945	1.62009
ENSMUSG00000025867.8	160.732	1162.78	-1.84014	0.999945	-2.85486
ENSMUSG00000096220.2	24.8936	118.77	-2.19224	0.999944	-2.25433
ENSMUSG00000036932.14	102.88	22.9893	1.52789	0.999944	2.16193
ENSMUSG00000028226.15	47.5703	224.565	-1.92013	0.999944	-2.239
ENSMUSG00000113893.1	70.4454	212.571	-1.71976	0.999944	-1.59337
ENSMUSG00000047246.7	54.4161	17.6535	1.64246	0.999943	1.62408
ENSMUSG00000029108.14	372.223	857.747	-1.71958	0.999942	-1.20439
ENSMUSG00000026203.16	491.384	261.142	1.52728	0.99994	0.912017
ENSMUSG00000031703.8	884.182	486.963	1.55216	0.999939	0.86053
ENSMUSG00000055491.14	39.4537	136.335	-2.04707	0.999937	-1.78892
ENSMUSG00000051339.10	40.5392	265.644	-2.19124	0.999937	-2.7121
ENSMUSG00000004661.15	111.754	16.8338	2.22137	0.999937	2.73089
ENSMUSG00000036580.15	1244.72	497.516	2.29362	0.999936	1.32301
ENSMUSG00000022141.7	1282.01	654.672	2.29353	0.999936	0.969564
ENSMUSG00000026077.15	50.7356	241.892	-1.57979	0.999935	-2.25329
ENSMUSG00000018076.12	445.869	772.171	-1.57983	0.999934	-0.792302
ENSMUSG00000038279.10	19.4425	72.3372	-1.5529	0.999934	-1.89553
ENSMUSG00000038178.16	541.388	298.463	1.52624	0.999933	0.85911
ENSMUSG00000022565.15	177.831	510.677	-1.40021	0.999932	-1.5219
ENSMUSG00000025083.18	20.6644	153.175	-2.0463	0.999931	-2.88996
ENSMUSG00000002372.9	159.274	66.5873	1.55332	0.999931	1.25819
ENSMUSG00000031917.12	21.351	91.5257	-2.10966	0.999931	-2.09987
ENSMUSG00000030852.18	12.9151	113.873	-2.04599	0.999929	-3.14029
ENSMUSG00000051351.14	39.2986	120.958	-1.55206	0.999928	-1.62195
ENSMUSG00000051331.16	95.9902	328.453	-1.7176	0.999928	-1.77473
ENSMUSG00000030122.12	214.795	511.168	-1.58091	0.999927	-1.25084
ENSMUSG00000006906.10	342.754	99.1528	2.29213	0.999925	1.78945
ENSMUSG00000028926.15	209.178	567.943	-1.441	0.999924	-1.44101
ENSMUSG00000034751.17	2764.34	1672.08	1.63997	0.999922	0.72529
ENSMUSG00000007216.6	44.8643	13.7462	1.55461	0.999919	1.70654
ENSMUSG00000009828.15	972.625	448.656	2.22388	0.999917	1.11627
ENSMUSG00000006736.9	131.201	28.6302	2.29045	0.999911	2.19617
ENSMUSG00000047146.17	585.253	346.177	1.55582	0.999909	0.757551
ENSMUSG00000049336.16	31.4791	368.97	-1.71536	0.999908	-3.55104
ENSMUSG00000024811.11	1366.87	901.173	1.5231	0.999906	0.600996
ENSMUSG00000039782.15	1797.77	1156.04	2.2252	0.999905	0.637021
ENSMUSG00000042271.13	403.26	107.257	2.28981	0.999905	1.91064
ENSMUSG00000027951.16	42.6796	206.591	-1.71466	0.999901	-2.27516
ENSMUSG00000020376.17	872.826	508.072	1.63785	0.999901	0.78066
ENSMUSG00000047459.14	178.125	53.2576	1.52256	0.999899	1.74183
ENSMUSG00000022811.17	456.318	966.399	-1.39593	0.999897	-1.08258
ENSMUSG00000038206.13	50.6486	234.608	-2.11303	0.999897	-2.21166
ENSMUSG00000073725.8	1434.92	978.375	1.55691	0.999897	0.552511
ENSMUSG00000037253.8	283.425	130.226	1.52223	0.999896	1.12195
ENSMUSG00000044864.16	175.841	37.4206	2.28885	0.999895	2.23237
ENSMUSG00000024120.12	345.96	88.333	2.22646	0.999892	1.96958
ENSMUSG00000072214.7	69.4091	355.51	-1.44423	0.99989	-2.3567
ENSMUSG00000030020.13	818.976	423.648	1.52149	0.999887	0.950953
ENSMUSG00000062098.11	248.511	115.512	1.52136	0.999886	1.10527
ENSMUSG00000002413.15	313.244	660.854	-1.84658	0.999886	-1.07705
ENSMUSG00000038160.7	18.5882	77.4114	-1.54741	0.999884	-2.05816
ENSMUSG00000032998.16	128.958	265.004	-1.44473	0.999884	-1.03911
ENSMUSG00000035877.17	485.276	233.411	1.52114	0.999883	1.05593
ENSMUSG00000024050.18	204.828	53.938	2.28756	0.999882	1.92504
ENSMUSG00000041923.15	35.1482	157.929	-1.54718	0.999881	-2.16776
ENSMUSG00000048148.18	247.874	948.611	-1.91341	0.999881	-1.93621
ENSMUSG00000025702.15	1334.08	890.664	1.52057	0.999877	0.582894
ENSMUSG00000071074.9	118.431	37.7456	1.63571	0.999876	1.64966
ENSMUSG00000008393.9	825.846	413.569	1.55877	0.999875	0.997744
ENSMUSG00000048661.14	214.457	394.283	-1.44579	0.999869	-0.87854
ENSMUSG00000030876.7	151.671	488.965	-1.393	0.999868	-1.68879
ENSMUSG00000040612.13	39.5806	191.719	-1.71143	0.999865	-2.27613
ENSMUSG00000011884.13	761.529	413.847	1.63492	0.999865	0.879803
ENSMUSG00000024431.15	1363.1	877.757	1.51921	0.999858	0.635001
ENSMUSG00000021957.7	1231.01	808.645	1.55998	0.999858	0.60627
ENSMUSG00000060503.6	18.2915	77.148	-1.54516	0.999858	-2.07646
ENSMUSG00000038024.17	177.774	375.691	-1.84958	0.999846	-1.0795
ENSMUSG00000019947.10	744.919	352.416	1.51819	0.999844	1.07981
ENSMUSG00000031442.21	135.216	400.409	-1.44771	0.999841	-1.56621
ENSMUSG00000031297.14	6.31844	62.2734	-1.91017	0.999837	-3.30098
ENSMUSG00000082277.2	9.67733	49.8741	-2.11728	0.999837	-2.36561
ENSMUSG00000058325.6	1516.61	747.389	2.23136	0.999835	1.02091
ENSMUSG00000024644.17	44.3883	134.613	-1.70911	0.999834	-1.60057
ENSMUSG00000024993.15	261.592	86.7696	1.51744	0.999833	1.59206
ENSMUSG00000001552.14	688.26	219.296	2.23168	0.999831	1.65008
ENSMUSG00000046101.16	35.2457	145.729	-1.85063	0.99983	-2.04777
ENSMUSG00000029916.11	34.8002	114.03	-1.38926	0.999827	-1.71224
ENSMUSG00000041935.10	757.678	462.674	1.43941	0.999827	0.711588
ENSMUSG00000038366.15	108.255	338.579	-1.97642	0.999825	-1.64506
ENSMUSG00000042302.14	226.867	431.989	-1.38908	0.999825	-0.929148
ENSMUSG00000001280.13	616.669	215.89	2.28286	0.999823	1.5142
ENSMUSG00000028567.8	205.61	99.4005	1.43714	0.999823	1.04859
ENSMUSG00000050751.14	115.688	23.7718	1.437	0.999823	2.28292
ENSMUSG00000003534.17	1196.94	760.739	1.43697	0.999823	0.653878
ENSMUSG00000021451.16	1563.32	1118.1	1.44271	0.999822	0.483564
ENSMUSG00000039536.16	365.491	188.181	1.44316	0.999821	0.957717
ENSMUSG00000045038.14	52.7162	745.122	-2.18167	0.999817	-3.82116
ENSMUSG00000029120.10	1148.01	534.722	1.43529	0.999816	1.10228
ENSMUSG00000029430.13	258.839	104.443	1.4444	0.999815	1.30934
ENSMUSG00000029152.13	643.124	395.814	1.44466	0.999813	0.700276
ENSMUSG00000004071.13	673.624	385.741	1.56292	0.999813	0.80431
ENSMUSG00000052296.7	528.434	312.909	1.43448	0.999812	0.755982
ENSMUSG00000028402.18	427.853	767.927	-1.85173	0.999812	-0.843853
ENSMUSG00000021540.16	273.068	554.193	-1.54198	0.999812	-1.02113
ENSMUSG00000030189.15	225.468	92.927	1.44493	0.999811	1.27875
ENSMUSG00000022553.16	167.334	26.6744	2.23311	0.999811	2.64921
ENSMUSG00000031302.16	261.043	484.218	-1.59144	0.999809	-0.89137
ENSMUSG00000039849.6	283.465	94.647	1.4454	0.999808	1.58254
ENSMUSG00000061751.16	118.399	553.561	-1.64846	0.999808	-2.22508
ENSMUSG00000117621.1	7.14866	66.2475	-2.11891	0.999808	-3.21212
ENSMUSG00000049775.16	2515.21	1549.47	1.63126	0.999807	0.698901
ENSMUSG00000002103.16	209.051	463.809	-1.6499	0.999806	-1.14968
ENSMUSG00000052229.5	553.12	1047.44	-1.64569	0.999804	-0.921207
ENSMUSG00000026404.12	13.6234	47.2543	-1.65065	0.999804	-1.79436
ENSMUSG00000046516.10	81.4494	20.227	1.44615	0.999804	2.00962
ENSMUSG00000065954.11	454.611	877.743	-1.64552	0.999803	-0.949166
ENSMUSG00000020037.15	45.5791	255.356	-1.908	0.999802	-2.48607
ENSMUSG00000061353.11	27.2106	307.514	-1.70688	0.999802	-3.49841
ENSMUSG00000039157.12	1182.5	792.036	1.43272	0.999801	0.578207
ENSMUSG00000030287.15	507.384	1074.55	-1.90776	0.999798	-1.08258
ENSMUSG00000028519.16	112.577	313.272	-1.65264	0.999796	-1.47651
ENSMUSG00000032652.13	83.8917	18.8136	2.28076	0.999794	2.15675
ENSMUSG00000022456.18	66.9587	384.28	-1.38648	0.999794	-2.52082
ENSMUSG00000063524.13	381.558	872.605	-1.65302	0.999793	-1.19342
ENSMUSG00000035189.17	1106.23	588.54	2.28065	0.999792	0.910439
ENSMUSG00000027466.15	197.779	82.2369	1.51488	0.99979	1.26603
ENSMUSG00000020721.16	198.323	424.669	-1.65404	0.999786	-1.09849
ENSMUSG00000028745.18	279.041	112.665	1.43038	0.999784	1.30844
ENSMUSG00000052387.16	232.003	628.518	-1.8534	0.999784	-1.43781
ENSMUSG00000021313.16	65.6372	325.04	-1.38562	0.999783	-2.30803
ENSMUSG00000049556.5	26.9505	366.25	-2.17991	0.999782	-3.76444
ENSMUSG00000028419.5	285.391	113.433	1.44834	0.999782	1.3311
ENSMUSG00000039210.16	179.211	66.0589	1.44851	0.99978	1.43983
ENSMUSG00000003949.16	73.5438	251.22	-1.38531	0.99978	-1.77227
ENSMUSG00000031993.7	130.912	386.672	-2.03502	0.999778	-1.56251
ENSMUSG00000018774.13	62.8018	19.9715	1.42951	0.999777	1.65286
ENSMUSG00000022995.16	593.223	1007.7	-1.6555	0.999774	-0.764414
ENSMUSG00000061689.15	121.435	382.099	-1.65559	0.999773	-1.65377
ENSMUSG00000027678.17	1064.82	546.04	1.44933	0.999772	0.963533
ENSMUSG00000055116.8	83.2539	26.8592	1.44937	0.999771	1.6321
ENSMUSG00000042447.13	45.0287	142.717	-1.38458	0.999771	-1.66425
ENSMUSG00000005103.12	554.005	942.183	-1.70485	0.999769	-0.766109
ENSMUSG00000016239.11	21.6495	61.0365	-1.38441	0.999769	-1.49534
ENSMUSG00000032501.9	41.9108	184.494	-1.85453	0.999763	-2.13818
ENSMUSG00000020248.18	79.2432	29.6434	1.62888	0.999761	1.41858
ENSMUSG00000041773.8	54.2553	928.573	-2.17863	0.999757	-4.09718
ENSMUSG00000027180.12	202.99	366.445	-1.38337	0.999756	-0.852189
ENSMUSG00000028184.12	46.3098	185.746	-1.90508	0.999749	-2.00394
ENSMUSG00000028434.12	232.246	105.757	1.45108	0.999748	1.1349
ENSMUSG00000028176.13	64.664	520.775	-1.65814	0.999746	-3.00963
ENSMUSG00000024566.10	299.697	96.9388	2.2376	0.999743	1.62836
ENSMUSG00000003810.13	250.307	94.5311	1.42553	0.999742	1.40484
ENSMUSG00000041645.14	419.05	203.187	1.42539	0.99974	1.04431
ENSMUSG00000063856.7	80.7762	22.545	1.51232	0.99974	1.84112
ENSMUSG00000015090.13	4161.04	1770.5	2.23787	0.999738	1.23278
ENSMUSG00000032320.7	264.41	566.204	-1.59637	0.999732	-1.09855
ENSMUSG00000036591.16	1586.95	1147.4	1.51191	0.999732	0.467888
ENSMUSG00000030226.12	12.4321	183.696	-1.5964	0.999732	-3.88517
ENSMUSG00000040268.17	2132.82	1411	1.42449	0.999732	0.596037
ENSMUSG00000005034.15	1778.01	1176.48	1.62746	0.999732	0.595778
ENSMUSG00000026447.17	1515.01	826.434	2.23866	0.999726	0.874354
ENSMUSG00000033799.10	665.58	361.725	1.42368	0.999724	0.879719
ENSMUSG00000031400.10	184.826	74.4434	1.42302	0.999718	1.31195
ENSMUSG00000015804.14	100.829	201.793	-1.38004	0.999716	-1.00097
ENSMUSG00000043531.16	373.107	221.504	1.34295	0.999715	0.752256
ENSMUSG00000034088.15	930.547	583.834	1.34275	0.999715	0.672521
ENSMUSG00000029390.13	382.57	206.672	1.34117	0.999715	0.888381
ENSMUSG00000029602.11	243.317	74.0489	1.34106	0.999715	1.71629
ENSMUSG00000037259.15	129.873	36.4766	1.3398	0.999714	1.83206
ENSMUSG00000056342.16	1526.16	1165.17	1.33954	0.999714	0.389374
ENSMUSG00000009394.13	48.1356	356.468	-1.63575	0.999712	-2.88859
ENSMUSG00000036427.5	619.47	328.4	1.34446	0.999712	0.915579
ENSMUSG00000024589.18	216.756	461.303	-1.37964	0.999712	-1.08964
ENSMUSG00000030045.10	78.0698	29.137	1.34529	0.99971	1.42191
ENSMUSG00000026436.15	499.915	309.967	1.34531	0.99971	0.689568
ENSMUSG00000032370.8	44.0087	15.484	1.34579	0.999709	1.50701
ENSMUSG00000026319.13	537.014	299.086	1.346	0.999708	0.844401
ENSMUSG00000028967.10	492.857	198.758	1.56824	0.999708	1.31015
ENSMUSG00000022094.15	32.4021	98.8359	-1.59789	0.999707	-1.60895
ENSMUSG00000069601.14	8680.07	5425.84	1.42187	0.999707	0.677862
ENSMUSG00000031835.16	548.91	223.627	2.27518	0.999707	1.29547
ENSMUSG00000046230.11	334.727	662.753	-1.53608	0.999705	-0.985489
ENSMUSG00000051695.6	289.671	149.916	1.34675	0.999705	0.950263
ENSMUSG00000026463.17	88.5896	559.176	-1.70107	0.999705	-2.65809
ENSMUSG00000047036.8	844.273	497.127	1.45382	0.999703	0.764096
ENSMUSG00000047603.9	42.348	13.0326	1.33558	0.999702	1.70017
ENSMUSG00000052534.15	240.925	516.431	-1.37873	0.999702	-1.09999
ENSMUSG00000096822.2	469.623	915.98	-1.6615	0.9997	-0.963815
ENSMUSG00000038717.8	222.772	382.946	-1.37852	0.9997	-0.781572
ENSMUSG00000035901.14	3044.39	2441.77	1.34799	0.999699	0.31823
ENSMUSG00000030522.14	881.579	536.834	1.33468	0.999698	0.715614
ENSMUSG00000030519.14	95.6203	335.422	-1.98297	0.999697	-1.81059
ENSMUSG00000040021.13	450.24	262.985	1.34858	0.999696	0.775716
ENSMUSG00000043090.18	82.6683	34.1995	1.33405	0.999696	1.27336
ENSMUSG00000032562.13	666.764	385.797	1.34872	0.999696	0.789334
ENSMUSG00000068882.13	214.681	102.042	1.34903	0.999694	1.07303
ENSMUSG00000024287.8	206.104	79.6129	1.51016	0.999694	1.3723
ENSMUSG00000078202.3	44.7314	135.974	-1.63417	0.999691	-1.60397
ENSMUSG00000090100.7	529.528	319.157	1.41996	0.999689	0.730444
ENSMUSG00000053094.15	62.6787	210.37	-2.03076	0.999689	-1.74688
ENSMUSG00000039662.16	131.837	29.5397	2.27404	0.999689	2.15803
ENSMUSG00000026437.11	502.321	283.37	1.3499	0.999688	0.825925
ENSMUSG00000079038.3	73.145	250.918	-1.85829	0.999688	-1.77838
ENSMUSG00000024743.16	13.0544	170.948	-1.63389	0.999687	-3.71096
ENSMUSG00000024991.8	1513.67	1063.4	1.50965	0.999682	0.509367
ENSMUSG00000040721.9	160.291	458.88	-1.85855	0.999682	-1.51742
ENSMUSG00000020255.8	6756.93	9896.68	-1.69972	0.999681	-0.550576
ENSMUSG00000022353.10	660.56	372.737	1.41897	0.99968	0.825532
ENSMUSG00000028412.17	3749.11	1829.36	2.27347	0.99968	1.03521
ENSMUSG00000022999.15	24.7207	80.1714	-1.90166	0.999679	-1.69737
ENSMUSG00000039988.14	408.752	208.347	1.41879	0.999678	0.972237
ENSMUSG00000033006.10	1540.4	834.519	1.56951	0.999678	0.884292
ENSMUSG00000024176.10	1169.33	655.706	1.50941	0.999677	0.834555
ENSMUSG00000034341.17	593.392	318.335	1.33072	0.999677	0.898441
ENSMUSG00000041936.18	350.075	622.463	-1.45547	0.999673	-0.830325
ENSMUSG00000019054.13	312.319	155.729	1.32938	0.999668	1.00398
ENSMUSG00000022568.17	535.848	255.659	1.56993	0.999668	1.0676
ENSMUSG00000036097.8	336.504	169.827	1.35284	0.999668	0.986554
ENSMUSG00000008859.8	223.365	106.641	1.4175	0.999667	1.06664
ENSMUSG00000003731.13	338.191	137.795	1.6246	0.999665	1.29532
ENSMUSG00000021690.10	889.437	555.04	1.3533	0.999664	0.680299
ENSMUSG00000059070.16	100.769	35.0895	1.41693	0.999662	1.52195
ENSMUSG00000069744.7	63.3897	15.5695	1.32833	0.999661	2.02553
ENSMUSG00000024911.7	93.4605	36.4886	1.35405	0.999658	1.35691
ENSMUSG00000047786.12	123.237	356.576	-1.85982	0.999655	-1.53277
ENSMUSG00000029191.16	419.341	236.647	1.35446	0.999654	0.825388
ENSMUSG00000034135.15	1667.53	1133.81	1.32723	0.999654	0.556537
ENSMUSG00000030161.8	261.056	117.077	1.32716	0.999653	1.1569
ENSMUSG00000021843.17	1856.6	1390.43	1.32711	0.999653	0.417137
ENSMUSG00000023456.16	161.384	393.516	-1.45645	0.999648	-1.28592
ENSMUSG00000019775.17	21.1279	105.295	-1.37247	0.999647	-2.31722
ENSMUSG00000044043.4	25.0613	143.662	-1.90014	0.999647	-2.51915
ENSMUSG00000057637.13	432.141	233.75	1.35535	0.999646	0.886538
ENSMUSG00000021670.14	512.393	301.613	1.32606	0.999646	0.764551
ENSMUSG00000034586.14	734.165	483.88	1.32602	0.999645	0.601454
ENSMUSG00000036766.12	143.862	414.095	-1.60183	0.999644	-1.52527
ENSMUSG00000018401.17	550.627	325.747	1.35585	0.999642	0.757323
ENSMUSG00000028869.13	56.4384	180.809	-1.86051	0.99964	-1.67972
ENSMUSG00000029502.14	155.979	307.849	-1.3714	0.99964	-0.980873
ENSMUSG00000028341.9	32.5015	254.205	-2.17377	0.999639	-2.96741
ENSMUSG00000038740.9	655.189	396.834	1.32503	0.999639	0.723376
ENSMUSG00000052456.9	34.0822	108.996	-1.3531	0.999639	-1.67718
ENSMUSG00000042810.14	70.9547	152.927	-1.35317	0.999638	-1.10787
ENSMUSG00000005873.6	1042.07	612.376	1.32501	0.999638	0.766967
ENSMUSG00000046312.4	112.481	400.302	-1.37108	0.999638	-1.83141
ENSMUSG00000034501.7	26.367	115.169	-1.35091	0.999638	-2.12695
ENSMUSG00000024122.16	311.177	595.046	-1.66561	0.999637	-0.935267
ENSMUSG00000059623.6	10.6833	42.7627	-1.63033	0.999636	-2.001
ENSMUSG00000038733.14	654.124	1089.27	-1.98559	0.999635	-0.735727
ENSMUSG00000047787.8	14.2413	37.2404	-1.35542	0.999635	-1.38679
ENSMUSG00000024231.15	47.1794	141.733	-1.35548	0.999635	-1.58695
ENSMUSG00000030016.14	1814.92	1306.36	1.50761	0.999635	0.474353
ENSMUSG00000026490.18	4358.05	3397.45	1.35678	0.999633	0.35923
ENSMUSG00000023033.14	137.186	511.626	-1.35679	0.999632	-1.89895
ENSMUSG00000020300.14	755.99	1215.74	-1.3568	0.999632	-0.685393
ENSMUSG00000035202.8	28819.1	40521.3	-1.35737	0.999631	-0.491657
ENSMUSG00000112557.1	725.68	1245.63	-1.34808	0.999631	-0.77947
ENSMUSG00000021277.16	87.3174	230.72	-1.34806	0.999631	-1.4018
ENSMUSG00000033105.12	306.846	153.946	1.41288	0.99963	0.99509
ENSMUSG00000017286.15	297.093	115.876	1.32366	0.999629	1.35833
ENSMUSG00000028423.15	308.858	158.666	1.45759	0.999629	0.960952
ENSMUSG00000079487.11	641.324	327.546	1.35731	0.999629	0.969357
ENSMUSG00000051329.13	277.156	112.085	1.50735	0.999628	1.30611
ENSMUSG00000036641.9	9.17685	68.1858	-1.34734	0.999628	-2.8934
ENSMUSG00000029592.11	576.649	339.499	1.35743	0.999627	0.764289
ENSMUSG00000074918.4	68.8254	24.3587	1.50728	0.999627	1.4985
ENSMUSG00000043962.16	547.626	838.243	-1.34692	0.999626	-0.614178
ENSMUSG00000027820.12	9.46551	45.7299	-1.36826	0.999626	-2.27239
ENSMUSG00000063445.14	236.074	67.1054	1.32326	0.999626	1.81474
ENSMUSG00000079481.11	61.2813	418.532	-1.62957	0.999625	-2.77182
ENSMUSG00000020198.8	499.398	850.879	-1.36746	0.999624	-0.768765
ENSMUSG00000032470.17	127.22	381.04	-1.66657	0.999622	-1.58262
ENSMUSG00000001482.15	74.031	30.188	1.32255	0.999621	1.29415
ENSMUSG00000034371.9	44.1637	10.9533	1.32253	0.999621	2.01149
ENSMUSG00000043909.16	331.421	562.406	-1.36336	0.999621	-0.762947
ENSMUSG00000020733.3	61.2805	181.539	-1.6666	0.999621	-1.56678
ENSMUSG00000060166.6	34.9052	110.344	-1.36471	0.99962	-1.66049
ENSMUSG00000034111.6	54.7836	150.234	-1.34603	0.99962	-1.4554
ENSMUSG00000030718.9	190.353	366.124	-1.34572	0.999617	-0.943656
ENSMUSG00000038481.13	1735.9	1237.67	1.32164	0.999615	0.488056
ENSMUSG00000001052.15	478.034	183.54	2.24598	0.999614	1.38102
ENSMUSG00000014496.8	2746.07	1825.44	1.41048	0.999613	0.589125
ENSMUSG00000022674.15	38.0497	151.402	-1.60395	0.999612	-1.99243
ENSMUSG00000039515.11	295.155	100.922	2.24617	0.999611	1.54824
ENSMUSG00000021785.8	122.384	29.3245	2.26874	0.999609	2.06124
ENSMUSG00000064138.14	296.094	153.792	1.40974	0.999609	0.945074
ENSMUSG00000025487.15	147.214	21.3511	2.26836	0.999605	2.78554
ENSMUSG00000023932.9	310.175	155.242	1.62226	0.999604	0.998562
ENSMUSG00000051343.11	60.0018	18.1934	1.31962	0.999602	1.72159
ENSMUSG00000035530.13	973.026	636.612	1.50626	0.999602	0.612065
ENSMUSG00000022744.12	616.13	211.273	2.2473	0.999597	1.54413
ENSMUSG00000028524.21	371.968	757.454	-1.34316	0.999594	-1.02598
ENSMUSG00000021024.14	96.1144	34.4409	1.3612	0.999592	1.48063
ENSMUSG00000007656.13	230.77	76.7852	1.40691	0.999592	1.58755
ENSMUSG00000035045.17	36.4413	193.598	-1.86273	0.999591	-2.40942
ENSMUSG00000027692.16	605.098	1406.31	-2.17196	0.99959	-1.21668
ENSMUSG00000037730.13	268.865	127.063	1.40659	0.99959	1.08134
ENSMUSG00000004591.16	360.543	196.805	1.40656	0.99959	0.8734
ENSMUSG00000040054.17	531.285	278.657	1.40557	0.999584	0.930995
ENSMUSG00000006456.10	79.3602	186.964	-1.60599	0.999584	-1.23628
ENSMUSG00000038871.5	629.043	363.552	1.62146	0.999583	0.790995
ENSMUSG00000032840.7	21.2126	84.9563	-1.62631	0.999582	-2.0018
ENSMUSG00000024217.10	96.3124	28.3898	1.31604	0.999581	1.76235
ENSMUSG00000038546.9	166.832	367.31	-1.53045	0.99958	-1.1386
ENSMUSG00000028292.14	20.2413	56.3031	-1.53039	0.999578	-1.47591
ENSMUSG00000032740.17	1991.1	1548.13	1.36284	0.999577	0.36304
ENSMUSG00000028034.15	518.91	843.055	-1.34174	0.999576	-0.700141
ENSMUSG00000026701.15	319.467	702.218	-1.89692	0.999576	-1.13625
ENSMUSG00000030067.17	68.9565	243.509	-1.98804	0.999575	-1.82022
ENSMUSG00000027363.15	618.546	358.461	1.40369	0.999575	0.787064
ENSMUSG00000027822.16	162.453	60.099	1.40333	0.999573	1.43461
ENSMUSG00000022905.12	400.229	232.552	1.31414	0.999571	0.783272
ENSMUSG00000039253.7	98.1165	25.4326	1.57374	0.999571	1.94782
ENSMUSG00000020564.17	77.4588	31.2251	1.40295	0.999571	1.31072
ENSMUSG00000027303.18	1185.14	861.428	1.40263	0.999569	0.46026
ENSMUSG00000023007.15	169.866	30.3843	2.26538	0.999569	2.48299
ENSMUSG00000096210.2	258.415	110.673	1.40252	0.999569	1.22339
ENSMUSG00000079173.11	40.1893	116.46	-1.45912	0.999567	-1.53496
ENSMUSG00000017485.11	903.891	1317.59	-1.12566	0.999563	-0.543676
ENSMUSG00000064357.1	35664	73488.5	-1.12567	0.999563	-1.04305
ENSMUSG00000030726.16	122.83	14.7666	2.25033	0.999563	3.05626
ENSMUSG00000030172.15	159.391	317.762	-1.12593	0.999562	-0.995377
ENSMUSG00000064341.1	23180.5	51094.2	-1.12622	0.999562	-1.14025
ENSMUSG00000032741.9	172.155	366.983	-1.60788	0.999561	-1.092
ENSMUSG00000006301.17	1273.15	631.34	2.26435	0.999559	1.01192
ENSMUSG00000040037.13	178.486	367.617	-1.12755	0.999559	-1.04239
ENSMUSG00000026109.14	2320.24	1416.1	2.2507	0.999559	0.712349
ENSMUSG00000030105.8	723.093	444.019	1.31127	0.999558	0.703561
ENSMUSG00000030816.8	186.764	347.101	-1.12383	0.999558	-0.894136
ENSMUSG00000032306.14	24.8924	101.26	-1.52954	0.999557	-2.02429
ENSMUSG00000003269.17	116.341	23.5539	2.251	0.999556	2.30432
ENSMUSG00000030788.16	1442.35	635.138	2.26391	0.999555	1.18328
ENSMUSG00000022472.16	1480.3	953.395	1.46099	0.999552	0.634747
ENSMUSG00000057841.5	281.777	617.069	-1.12286	0.999552	-1.13088
ENSMUSG00000040260.8	2934.43	1845.19	1.30958	0.999551	0.669309
ENSMUSG00000028528.17	952.385	478.654	1.30943	0.99955	0.992563
ENSMUSG00000012429.9	31.2989	113.105	-1.62343	0.99955	-1.85348
ENSMUSG00000074865.11	29.2944	74.6504	-1.12228	0.999549	-1.34953
ENSMUSG00000038412.8	58.9201	12.7466	1.39805	0.999548	2.20864
ENSMUSG00000008206.16	89.877	207.495	-1.4598	0.999546	-1.20705
ENSMUSG00000064358.1	17362.3	32401.1	-1.12935	0.999545	-0.900086
ENSMUSG00000033722.9	255.653	89.4953	1.50392	0.999543	1.5143
ENSMUSG00000013698.12	1653.43	1123.66	1.39645	0.999541	0.557255
ENSMUSG00000030956.15	804.508	535.795	1.36732	0.999539	0.586426
ENSMUSG00000024576.14	1645.78	1308.99	1.30624	0.999539	0.330308
ENSMUSG00000046567.10	135.779	38.2796	1.46161	0.999538	1.82661
ENSMUSG00000037646.10	968.507	1228.14	-1.12117	0.999536	-0.342637
ENSMUSG00000021905.14	55.796	19.8215	1.46168	0.999536	1.4931
ENSMUSG00000003161.15	269.639	111.128	1.39514	0.999535	1.2788
ENSMUSG00000057530.14	131.668	48.0312	1.30511	0.999535	1.45486
ENSMUSG00000038936.13	929.049	412.197	2.26093	0.999534	1.17242
ENSMUSG00000020175.15	15.7217	66.2279	-1.8654	0.999534	-2.07468
ENSMUSG00000032340.8	1843.64	1438.87	1.30423	0.999532	0.357625
ENSMUSG00000041992.9	482.966	283.132	1.36857	0.999531	0.770449
ENSMUSG00000111779.1	20.3755	54.9201	-1.33885	0.99953	-1.4305
ENSMUSG00000006390.15	422.232	143.755	2.25514	0.99953	1.55443
ENSMUSG00000024026.13	430.591	237.674	1.39383	0.99953	0.857338
ENSMUSG00000028309.14	1009.76	535.566	2.2588	0.999528	0.914875
ENSMUSG00000055065.7	2844.3	1877.49	1.39305	0.999527	0.599267
ENSMUSG00000025268.15	52.2876	137.115	-1.6204	0.999526	-1.39085
ENSMUSG00000029840.8	295.282	645.082	-1.12025	0.999525	-1.12739
ENSMUSG00000032437.10	396.32	673.094	-1.33836	0.999522	-0.764142
ENSMUSG00000039219.18	970.078	658.836	1.30112	0.999521	0.558183
ENSMUSG00000019984.16	309.413	497.871	-1.11977	0.999519	-0.686237
ENSMUSG00000031622.16	288.753	135.85	1.30018	0.999518	1.08782
ENSMUSG00000026662.13	29.6845	132.739	-1.89423	0.999518	-2.16081
ENSMUSG00000034868.9	45.938	209.696	-1.6135	0.999517	-2.19054
ENSMUSG00000045664.5	277.054	138.382	1.29967	0.999516	1.00151
ENSMUSG00000068523.12	34.402	156.588	-2.16933	0.999516	-2.18641
ENSMUSG00000034902.17	80.8967	609.53	-2.13081	0.999516	-2.91355
ENSMUSG00000034818.17	12.5797	212.317	-1.61409	0.999516	-4.07706
ENSMUSG00000031657.16	395.583	215.913	1.37111	0.999516	0.873532
ENSMUSG00000037110.20	118.934	284.446	-1.338	0.999515	-1.25799
ENSMUSG00000004768.14	38.9979	118.322	-1.61524	0.999514	-1.60125
ENSMUSG00000092329.1	127.882	349.179	-1.13189	0.999514	-1.44916
ENSMUSG00000022253.15	183.009	364.177	-1.61558	0.999513	-0.992723
ENSMUSG00000028901.13	175.026	74.077	1.29808	0.999511	1.24047
ENSMUSG00000039976.4	498.686	295.167	1.29789	0.99951	0.756599
ENSMUSG00000018171.9	1059.26	617.339	1.38868	0.99951	0.778924
ENSMUSG00000020873.15	103.352	41.4472	1.29686	0.999506	1.31821
ENSMUSG00000034656.18	25.7163	178.564	-1.99089	0.999504	-2.79569
ENSMUSG00000020642.13	209.586	379.203	-1.11878	0.999504	-0.855424
ENSMUSG00000034761.15	1200.07	657.226	1.50234	0.999503	0.86865
ENSMUSG00000020900.15	110.742	414.248	-1.33738	0.999502	-1.9033
ENSMUSG00000028383.17	155.419	350.11	-1.13264	0.999501	-1.17164
ENSMUSG00000029328.15	1354.01	950.072	1.37469	0.9995	0.511125
ENSMUSG00000007659.18	619.392	265.268	1.38512	0.999499	1.2234
ENSMUSG00000024312.10	32.4724	9.63288	1.38506	0.999499	1.75317
ENSMUSG00000060477.14	61.1838	145.046	-1.1185	0.999498	-1.24528
ENSMUSG00000022351.14	242.678	98.6129	1.3842	0.999497	1.2992
ENSMUSG00000021939.8	1297.91	838.975	1.38394	0.999497	0.62949
ENSMUSG00000064373.12	2506.03	1607.44	1.38363	0.999496	0.640633
ENSMUSG00000090841.2	321.111	152.409	1.3762	0.999496	1.07512
ENSMUSG00000073639.6	314.089	167.807	1.38343	0.999496	0.904369
ENSMUSG00000053044.8	12.5602	3.25687	1.38331	0.999496	1.94731
ENSMUSG00000022463.8	1054.45	677.068	1.3829	0.999495	0.639113
ENSMUSG00000018796.13	585.76	356.889	1.38237	0.999494	0.714832
ENSMUSG00000005881.13	59.9052	22.5452	1.38228	0.999494	1.40986
ENSMUSG00000032517.16	20143.2	12972	1.57655	0.999494	0.634891
ENSMUSG00000032648.14	63.465	27.3334	1.38062	0.999493	1.2153
ENSMUSG00000112122.1	82.2675	282.891	-1.86736	0.999493	-1.78185
ENSMUSG00000029064.15	985.997	1775.27	-1.11812	0.999491	-0.848385
ENSMUSG00000048012.19	20.035	50.9459	-1.33667	0.999486	-1.34644
ENSMUSG00000028550.15	625.703	367.905	1.46377	0.999485	0.766145
ENSMUSG00000074607.11	8.89599	48.1831	-1.5266	0.999484	-2.4373
ENSMUSG00000022636.13	330.219	600.86	-1.68317	0.999476	-0.863606
ENSMUSG00000024393.14	863.469	1316.6	-1.68298	0.999476	-0.608605
ENSMUSG00000025878.16	113.497	251.687	-1.13414	0.999475	-1.14897
ENSMUSG00000035953.14	179.274	77.454	1.57726	0.999474	1.21075
ENSMUSG00000068457.14	552.819	959.663	-1.52619	0.999473	-0.795722
ENSMUSG00000042104.18	158.446	369.343	-1.46205	0.999471	-1.22096
ENSMUSG00000026819.15	58.3576	118.805	-1.13441	0.999469	-1.0256
ENSMUSG00000056493.9	278.59	134.417	1.50102	0.999469	1.05143
ENSMUSG00000063873.10	31.498	153.182	-1.46216	0.999468	-2.28192
ENSMUSG00000025656.17	216.56	704.574	-1.46217	0.999467	-1.70198
ENSMUSG00000020706.13	56.1063	204.77	-2.13258	0.999465	-1.86777
ENSMUSG00000038372.14	26.7504	9.44144	1.28867	0.999464	1.50248
ENSMUSG00000037376.14	101.808	22.4297	1.61711	0.999462	2.18236
ENSMUSG00000079157.4	15.7641	114.1	-2.02142	0.99946	-2.85558
ENSMUSG00000066406.16	309.608	545.897	-1.46242	0.999459	-0.818184
ENSMUSG00000032097.10	914.209	1218.56	-1.13489	0.999459	-0.414581
ENSMUSG00000043448.13	480.849	271.39	1.28795	0.999459	0.825216
ENSMUSG00000033417.16	196.851	456.958	-1.99278	0.999458	-1.21496
ENSMUSG00000032625.14	466.833	291.537	1.28728	0.999454	0.679228
ENSMUSG00000042109.8	67.5345	227.98	-2.16699	0.999448	-1.75521
ENSMUSG00000024583.3	62.0058	227.016	-2.13322	0.999447	-1.87232
ENSMUSG00000013033.16	280.303	836.029	-1.87042	0.999436	-1.57657
ENSMUSG00000038486.9	1031.51	621.073	1.28511	0.999435	0.731923
ENSMUSG00000027894.14	12.8562	448.211	-1.88968	0.999432	-5.12364
ENSMUSG00000020536.12	949.818	619.059	1.28457	0.99943	0.617574
ENSMUSG00000038077.7	1574.13	910.509	1.49949	0.99943	0.789805
ENSMUSG00000013236.17	709.978	1566.65	-2.13384	0.999429	-1.14184
ENSMUSG00000034675.17	18.6992	205.994	-1.8895	0.999429	-3.46155
ENSMUSG00000030166.14	98.0471	333.987	-1.11515	0.999427	-1.76824
ENSMUSG00000024571.15	142.716	50.7523	1.46625	0.999425	1.4916
ENSMUSG00000063870.12	1633.12	1161.82	1.46637	0.999422	0.491243
ENSMUSG00000037119.4	405.457	605.989	-1.1148	0.999418	-0.579743
ENSMUSG00000032011.5	88.5712	1649.9	-1.87168	0.999416	-4.2194
ENSMUSG00000028427.13	30.9798	98.8615	-1.88844	0.999411	-1.67408
ENSMUSG00000040563.13	14.9099	134.358	-1.87251	0.999404	-3.17174
ENSMUSG00000031450.8	44.2548	106.414	-1.11407	0.9994	-1.26579
ENSMUSG00000027805.16	413.732	755.934	-1.11374	0.999392	-0.869562
ENSMUSG00000012114.17	115.441	350.154	-2.1352	0.999391	-1.60083
ENSMUSG00000054716.4	67.3355	18.3691	1.28085	0.999391	1.87409
ENSMUSG00000020948.9	248.249	93.904	1.6146	0.999391	1.40253
ENSMUSG00000060538.14	37.4939	9.33585	1.49776	0.999388	2.0058
ENSMUSG00000093445.7	89.4077	31.1009	1.58094	0.999372	1.52344
ENSMUSG00000031209.14	8.02477	38.7371	-2.16426	0.999371	-2.27118
ENSMUSG00000040759.9	540.218	250.275	1.49707	0.999371	1.11003
ENSMUSG00000039470.15	86.4031	24.8895	1.497	0.999369	1.79554
ENSMUSG00000029169.11	685.953	484.209	1.12443	0.999368	0.502478
ENSMUSG00000010608.15	1749.81	1149.48	1.12865	0.999368	0.606213
ENSMUSG00000066232.4	476.711	274.534	1.2789	0.999364	0.796131
ENSMUSG00000022099.17	29.9703	233.667	-1.88385	0.999361	-2.96285
ENSMUSG00000051790.15	122.318	52.0221	1.46911	0.999358	1.23344
ENSMUSG00000040669.14	476.869	288.851	1.12118	0.999356	0.723271
ENSMUSG00000042331.13	1757.89	1432.24	1.12116	0.999356	0.295571
ENSMUSG00000027893.14	1075.48	1537.78	-1.87737	0.999355	-0.51587
ENSMUSG00000094347.2	340.711	568.726	-1.11233	0.999354	-0.739185
ENSMUSG00000033059.7	175.059	397.471	-1.87831	0.999351	-1.18301
ENSMUSG00000059278.9	28.0211	9.08723	1.12006	0.999349	1.6246
ENSMUSG00000025158.7	91.3897	40.981	1.13311	0.999348	1.15708
ENSMUSG00000024533.17	398.934	851.846	-1.88071	0.999347	-1.09444
ENSMUSG00000062867.13	36.4879	133.595	-1.88061	0.999347	-1.87238
ENSMUSG00000054752.16	289.385	162.119	1.13333	0.999346	0.835936
ENSMUSG00000002524.17	420.42	250.078	1.11938	0.999345	0.749449
ENSMUSG00000036622.15	224.498	98.8492	1.49589	0.999344	1.1834
ENSMUSG00000075470.2	91.1492	329.742	-2.16317	0.999342	-1.85504
ENSMUSG00000022391.16	64.3065	277.198	-1.52106	0.999337	-2.10788
ENSMUSG00000027465.13	130.139	63.1977	1.27706	0.999337	1.04212
ENSMUSG00000057981.5	31.244	150.9	-1.99871	0.999334	-2.27195
ENSMUSG00000037788.14	12.9165	124.988	-2.16273	0.999331	-3.27449
ENSMUSG00000096847.2	13.158	58.8579	-1.11142	0.999328	-2.16129
ENSMUSG00000056050.13	673.493	445.078	1.27644	0.999327	0.597605
ENSMUSG00000028207.18	91.2397	345.102	-1.99912	0.999327	-1.91929
ENSMUSG00000015202.13	215.923	83.5616	1.13549	0.999326	1.36961
ENSMUSG00000005610.17	4455.24	3654.65	1.27619	0.999324	0.285769
ENSMUSG00000059890.16	532.981	360.748	1.11629	0.999322	0.563093
ENSMUSG00000031592.10	1545.71	1119.64	1.47101	0.999317	0.46523
ENSMUSG00000055932.15	627.515	437.924	1.11527	0.999314	0.518971
ENSMUSG00000036712.15	809.235	550.897	1.13664	0.999314	0.554776
ENSMUSG00000026024.14	265.384	142.805	1.11518	0.999313	0.894039
ENSMUSG00000018707.13	6170.61	4560.02	1.49442	0.999312	0.436372
ENSMUSG00000019907.10	766.4	534.214	1.1144	0.999306	0.52068
ENSMUSG00000021662.11	772.529	504.813	1.27507	0.999306	0.613839
ENSMUSG00000083282.3	159.21	75.8523	1.49396	0.999302	1.06967
ENSMUSG00000025747.12	39.6338	154.831	-2.01275	0.999293	-1.9659
ENSMUSG00000052981.6	5.54177	194.266	-2.0126	0.999292	-5.13154
ENSMUSG00000044308.17	1322.14	1051.7	1.11293	0.999292	0.330154
ENSMUSG00000112149.1	255.525	456.817	-1.11013	0.999291	-0.838151
ENSMUSG00000032812.18	470.379	239.293	1.11273	0.99929	0.975047
ENSMUSG00000004980.16	2952.46	2180.85	1.27415	0.999289	0.437027
ENSMUSG00000027223.15	2304.24	1442.38	1.61074	0.999287	0.67584
ENSMUSG00000032330.7	80.0659	233.847	-1.32921	0.999287	-1.54631
ENSMUSG00000020340.16	362.81	1259.61	-1.32907	0.999283	-1.79569
ENSMUSG00000016346.17	27.2088	436.001	-2.00313	0.999276	-4.00219
ENSMUSG00000028719.8	116.933	38.2658	1.49235	0.999272	1.61155
ENSMUSG00000045763.8	76.0374	540.194	-2.0105	0.999272	-2.8287
ENSMUSG00000091945.2	550.229	1248.72	-2.13977	0.999272	-1.18234
ENSMUSG00000030747.5	190.729	75.0453	1.27319	0.999271	1.34569
ENSMUSG00000002014.12	68.8833	21.473	1.11059	0.999268	1.68163
ENSMUSG00000058006.12	811.48	508.151	1.58497	0.999267	0.675298
ENSMUSG00000022307.16	1026.66	493.496	1.58505	0.999265	1.05685
ENSMUSG00000014776.7	66.1327	23.6487	1.49165	0.99926	1.4836
ENSMUSG00000035936.6	311.346	147.242	1.27251	0.999259	1.08033
ENSMUSG00000026775.9	319.041	504.734	-1.14234	0.999258	-0.661779
ENSMUSG00000027305.9	11.1564	30.1369	-1.46798	0.999258	-1.43366
ENSMUSG00000003134.10	15.5534	95.9135	-2.00698	0.999257	-2.6245
ENSMUSG00000030257.16	683.659	1310.39	-1.51801	0.999255	-0.93865
ENSMUSG00000090053.9	347.341	164.876	1.47457	0.999252	1.07497
ENSMUSG00000040481.17	1604.59	1160.68	1.49117	0.999251	0.467239
ENSMUSG00000040907.15	141.333	1081.75	-1.51784	0.99925	-2.9362
ENSMUSG00000025217.15	245.35	97.7203	1.58565	0.99925	1.32811
ENSMUSG00000021546.18	1926.7	1448.28	1.58576	0.999248	0.411788
ENSMUSG00000062127.11	572.223	353.815	1.14154	0.999248	0.693583
ENSMUSG00000026484.13	78.4468	167.694	-1.10856	0.999243	-1.09604
ENSMUSG00000036199.9	54.3209	14.4604	1.47514	0.999243	1.9094
ENSMUSG00000024787.14	170.695	79.9254	1.10795	0.99924	1.0947
ENSMUSG00000028032.13	587.842	375.037	1.14208	0.999239	0.648397
ENSMUSG00000045071.14	426.899	216.373	1.49024	0.999238	0.980372
ENSMUSG00000026553.17	917.05	641.414	1.14225	0.999236	0.515745
ENSMUSG00000070871.10	264.063	103.459	1.48993	0.999233	1.35183
ENSMUSG00000028849.17	2054.17	1460.83	1.60849	0.999233	0.491767
ENSMUSG00000043384.15	393.183	804.892	-1.1082	0.999233	-1.03359
ENSMUSG00000021427.10	1018.14	692.225	1.48986	0.999233	0.556629
ENSMUSG00000007817.15	887.51	1175.38	-1.10815	0.999231	-0.405285
ENSMUSG00000015363.13	54.0465	16.1069	1.14253	0.999231	1.74652
ENSMUSG00000030126.17	1180.14	793.794	1.476	0.999229	0.572125
ENSMUSG00000020671.9	1390.35	913.938	1.58671	0.999227	0.605282
ENSMUSG00000019818.15	541.187	267.147	1.48939	0.999226	1.01849
ENSMUSG00000030701.17	4126.53	3159.17	1.10634	0.999223	0.385385
ENSMUSG00000027610.17	198.821	48.9468	1.14314	0.999221	2.02218
ENSMUSG00000034951.10	150.757	70.3478	1.27044	0.999217	1.09964
ENSMUSG00000109901.2	336.579	189.656	1.1434	0.999216	0.827558
ENSMUSG00000031431.13	512.966	231.98	1.48858	0.999216	1.14486
ENSMUSG00000024735.13	372.903	239.484	1.14345	0.999215	0.638871
ENSMUSG00000027300.10	52.3226	18.122	1.47725	0.999215	1.52969
ENSMUSG00000061024.8	321.888	122.994	1.48848	0.999214	1.38797
ENSMUSG00000000708.14	728.359	412.004	1.48782	0.999206	0.821993
ENSMUSG00000028243.5	109.442	28.18	1.47844	0.999202	1.95743
ENSMUSG00000039361.11	3275.03	2250.23	1.26968	0.999201	0.541435
ENSMUSG00000017781.17	250.551	523.891	-1.10715	0.999201	-1.06417
ENSMUSG00000021986.9	871.793	460.203	1.60697	0.999201	0.921716
ENSMUSG00000015476.6	250.49	124.889	1.26964	0.9992	1.00411
ENSMUSG00000089872.10	196.239	81.3241	1.10414	0.999198	1.27086
ENSMUSG00000015932.8	751.061	468.475	1.1041	0.999198	0.680959
ENSMUSG00000038418.7	2421.59	3592.71	-1.32633	0.999196	-0.569115
ENSMUSG00000064137.6	116.49	469.164	-2.14378	0.999194	-2.00989
ENSMUSG00000020561.8	76.5535	23.5457	1.47931	0.999194	1.701
ENSMUSG00000004394.12	209.274	84.0525	1.4862	0.999194	1.31603
ENSMUSG00000028488.15	117.112	384.949	-1.10689	0.999193	-1.71677
ENSMUSG00000010376.15	58.6506	20.7747	1.10365	0.999193	1.49732
ENSMUSG00000006800.14	1033.43	620.685	1.48578	0.99919	0.735508
ENSMUSG00000027447.6	1624.99	3483.27	-2.14427	0.999187	-1.10002
ENSMUSG00000025078.9	378.197	153.638	1.4853	0.999186	1.2996
ENSMUSG00000031667.16	650.736	394.086	1.10304	0.999186	0.723561
ENSMUSG00000062397.8	889.157	587.282	1.14523	0.999184	0.598384
ENSMUSG00000030706.17	225.877	82.269	1.48466	0.999184	1.45712
ENSMUSG00000037331.15	512.026	261.59	1.48453	0.999184	0.968908
ENSMUSG00000027860.15	206.096	82.4848	1.48351	0.999183	1.32112
ENSMUSG00000053581.13	76.3308	25.3104	1.48262	0.999182	1.59253
ENSMUSG00000044550.11	39.6817	169.157	-1.10649	0.999181	-2.09182
ENSMUSG00000089715.12	561.819	307.471	1.14545	0.99918	0.869654
ENSMUSG00000032216.15	2299.31	1701.86	1.58948	0.999173	0.434088
ENSMUSG00000028737.15	67.5399	22.3567	1.10182	0.999172	1.59504
ENSMUSG00000039428.11	306.233	124.966	1.60541	0.999172	1.29309
ENSMUSG00000022305.13	169.161	61.2925	1.59019	0.999161	1.46462
ENSMUSG00000050910.5	436.028	186.526	1.59035	0.999158	1.22504
ENSMUSG00000028556.15	106.485	199.836	-1.10572	0.999158	-0.908161
ENSMUSG00000056515.9	1040.86	630.608	1.2676	0.999155	0.722964
ENSMUSG00000041912.12	244.947	98.1814	1.59056	0.999155	1.31895
ENSMUSG00000025025.14	292.437	436.241	-1.10556	0.999154	-0.576998
ENSMUSG00000020572.8	406.901	173.89	1.59095	0.999149	1.22651
ENSMUSG00000011832.16	710.562	455.707	1.14757	0.99914	0.640856
ENSMUSG00000027695.16	289.946	560.107	-1.51356	0.999135	-0.949918
ENSMUSG00000024039.15	87.8432	212.78	-1.10491	0.999134	-1.27636
ENSMUSG00000049092.11	89.7388	178.046	-1.1049	0.999134	-0.988449
ENSMUSG00000037326.10	89.8749	32.9114	1.59259	0.999128	1.44933
ENSMUSG00000032966.14	725.934	394.592	1.5928	0.999126	0.879478
ENSMUSG00000055053.18	616.13	333.865	1.60175	0.999121	0.88397
ENSMUSG00000020886.17	220.488	725.895	-1.47173	0.999121	-1.71906
ENSMUSG00000024816.12	629.35	367.948	1.09753	0.999121	0.774361
ENSMUSG00000035078.6	300.9	135.459	1.59329	0.999121	1.15143
ENSMUSG00000042197.13	555.337	337.159	1.09736	0.999119	0.719937
ENSMUSG00000021179.8	117.68	31.7984	1.59447	0.999108	1.88785
ENSMUSG00000020741.17	139.606	37.9841	1.60016	0.999107	1.87789
ENSMUSG00000040407.18	1618.5	1032.62	1.59993	0.999106	0.648348
ENSMUSG00000027506.15	618.043	357.197	1.59829	0.999101	0.790987
ENSMUSG00000025016.11	924.026	550.814	1.59683	0.9991	0.746367
ENSMUSG00000023944.14	5071.66	3793.78	1.59805	0.9991	0.418821
ENSMUSG00000074129.14	595.262	1039.94	-1.51216	0.999098	-0.804897
ENSMUSG00000026787.3	22.2221	99.2417	-1.06713	0.999096	-2.15895
ENSMUSG00000005682.9	114.634	206.947	-1.06799	0.999094	-0.852218
ENSMUSG00000029014.14	64.5816	138.576	-1.06231	0.999093	-1.10148
ENSMUSG00000043445.7	265.544	164.376	1.09531	0.999092	0.691955
ENSMUSG00000090213.1	407.838	239.236	1.09507	0.999089	0.769562
ENSMUSG00000020737.12	25.898	79.7792	-1.06169	0.999089	-1.62317
ENSMUSG00000009927.9	353.017	689.524	-1.06158	0.999088	-0.965862
ENSMUSG00000020260.9	52.8386	17.1136	1.09497	0.999088	1.62645
ENSMUSG00000052214.9	27.6921	72.0553	-1.06923	0.999088	-1.37963
ENSMUSG00000025314.16	431.365	696.613	-1.10322	0.999087	-0.691449
ENSMUSG00000006010.14	145.468	235.831	-1.06134	0.999086	-0.697055
ENSMUSG00000057329.7	17.4775	39.6358	-1.06132	0.999086	-1.18131
ENSMUSG00000018593.13	623.37	1021.51	-1.06099	0.999084	-0.712544
ENSMUSG00000098274.7	361.445	195.584	1.09455	0.999082	0.885986
ENSMUSG00000022772.12	99.0243	215.035	-1.0606	0.999082	-1.11872
ENSMUSG00000113949.1	33.8991	12.9071	1.15058	0.999082	1.39308
ENSMUSG00000025758.10	24.9101	54.6929	-1.14788	0.99908	-1.13462
ENSMUSG00000004032.10	216.42	368.605	-1.06006	0.999078	-0.768244
ENSMUSG00000034042.16	427.805	255.504	1.15086	0.999076	0.743604
ENSMUSG00000028826.14	156.987	304.204	-1.14805	0.999075	-0.954392
ENSMUSG00000030779.16	563.295	791.465	-1.07111	0.999073	-0.490634
ENSMUSG00000020770.13	116.273	202.851	-1.07167	0.999069	-0.802903
ENSMUSG00000022296.9	96.3889	294.168	-1.51095	0.999066	-1.6097
ENSMUSG00000034998.18	492.513	313.203	1.09329	0.999065	0.653062
ENSMUSG00000018548.15	176.438	461.612	-1.0724	0.999061	-1.38752
ENSMUSG00000058153.15	178.387	422.002	-1.14862	0.999056	-1.24224
ENSMUSG00000038860.15	97.3913	339.019	-1.05739	0.999049	-1.7995
ENSMUSG00000042763.9	17.7514	68.9007	-1.32171	0.999047	-1.95659
ENSMUSG00000022526.8	30.1237	83.713	-1.0744	0.999039	-1.47456
ENSMUSG00000027215.13	410.888	224.185	1.26253	0.999035	0.874056
ENSMUSG00000039682.12	706.501	441.447	1.09107	0.999033	0.67845
ENSMUSG00000027357.16	24.8198	64.118	-1.05559	0.999023	-1.36924
ENSMUSG00000041355.13	92.4121	44.2963	1.15387	0.999017	1.06089
ENSMUSG00000001642.18	94.8079	39.9704	1.15393	0.999016	1.24607
ENSMUSG00000021936.14	306.184	539.498	-1.05507	0.999014	-0.817219
ENSMUSG00000032936.13	19.331	272.119	-1.50893	0.999014	-3.81525
ENSMUSG00000024172.10	9.0282	44.1083	-1.47499	0.999009	-2.28854
ENSMUSG00000021140.9	692.853	482.671	1.15488	0.998998	0.521509
ENSMUSG00000052512.17	928.942	1240.66	-1.15063	0.998993	-0.417444
ENSMUSG00000018661.17	37.8168	120.158	-1.27339	0.998989	-1.66784
ENSMUSG00000056211.13	1374.87	2537.01	-1.27445	0.998989	-0.883833
ENSMUSG00000062044.16	48.1388	189.491	-1.27497	0.998989	-1.97686
ENSMUSG00000028161.17	722.172	1523.02	-1.27276	0.998989	-1.07652
ENSMUSG00000037624.15	29.9474	96.0192	-1.2713	0.998984	-1.68089
ENSMUSG00000046432.12	31.8749	145.721	-1.27037	0.998981	-2.19272
ENSMUSG00000049001.5	26.8391	78.543	-1.27008	0.99898	-1.54915
ENSMUSG00000061601.15	963.944	1942.3	-1.07904	0.998978	-1.01075
ENSMUSG00000037217.15	113.09	473.657	-1.15114	0.998977	-2.06638
ENSMUSG00000039652.16	184.086	465.256	-1.47621	0.998971	-1.33765
ENSMUSG00000021792.15	147.208	263.217	-1.07961	0.99897	-0.838397
ENSMUSG00000073702.11	253.668	637.968	-1.26839	0.998969	-1.33054
ENSMUSG00000038736.10	169.342	313.377	-1.28045	0.998966	-0.887962
ENSMUSG00000042873.11	120.902	257.354	-1.0981	0.998966	-1.08992
ENSMUSG00000038248.8	74.7513	265.974	-1.09799	0.998964	-1.83112
ENSMUSG00000057738.14	1330.08	2147.67	-1.31896	0.998964	-0.691258
ENSMUSG00000036053.17	1670.61	1217.2	1.25962	0.998964	0.456817
ENSMUSG00000035566.7	815.443	572.414	1.08682	0.998963	0.510525
ENSMUSG00000039217.13	129.721	270.385	-1.26745	0.998963	-1.0596
ENSMUSG00000000538.18	942.389	694.332	1.08678	0.998963	0.440696
ENSMUSG00000021832.8	343.212	197.623	1.08675	0.998962	0.79635
ENSMUSG00000024654.8	380.532	819.821	-1.26723	0.998962	-1.10729
ENSMUSG00000032047.5	42.3198	121.887	-1.28157	0.998958	-1.52614
ENSMUSG00000039529.9	179.447	75.6892	1.08632	0.998955	1.2454
ENSMUSG00000039286.12	140.293	252.01	-1.08079	0.998954	-0.845035
ENSMUSG00000037286.15	446.327	865.44	-1.28273	0.998947	-0.955334
ENSMUSG00000079477.9	1016.5	731.772	1.15773	0.998946	0.474137
ENSMUSG00000036890.13	136.418	242.734	-1.26545	0.998945	-0.831346
ENSMUSG00000054793.8	581.299	333.158	1.25884	0.998944	0.803074
ENSMUSG00000036499.9	591.577	905.535	-1.05131	0.998943	-0.614206
ENSMUSG00000022052.9	851.573	608.317	1.15812	0.998939	0.485306
ENSMUSG00000031781.14	33.7864	116.28	-1.50576	0.998937	-1.78309
ENSMUSG00000031822.20	484.8	283.493	1.15825	0.998936	0.774077
ENSMUSG00000057649.6	178.448	319.79	-1.09617	0.998933	-0.841624
ENSMUSG00000089911.4	529.02	351.886	1.08509	0.998932	0.588213
ENSMUSG00000117357.1	43.2985	8.83415	1.25835	0.998932	2.29315
ENSMUSG00000021488.8	1697.34	1380.45	1.08504	0.998932	0.298132
ENSMUSG00000005354.16	80.0195	154.821	-1.26397	0.998931	-0.952181
ENSMUSG00000030513.14	541.423	292.825	1.1586	0.99893	0.886715
ENSMUSG00000029922.15	310.206	156.88	1.20488	0.998925	0.983564
ENSMUSG00000032116.18	668.766	443.386	1.20349	0.998925	0.59294
ENSMUSG00000039501.14	563.622	359.456	1.20314	0.998924	0.648912
ENSMUSG00000025060.15	1682.27	1213.83	1.2073	0.998922	0.470842
ENSMUSG00000027792.11	295.62	153.045	1.20261	0.998922	0.949788
ENSMUSG00000070576.4	30.0812	107.539	-1.26311	0.998921	-1.83792
ENSMUSG00000021219.16	67.954	27.2184	1.20161	0.998919	1.31997
ENSMUSG00000017670.16	110.266	48.5247	1.20138	0.998919	1.18419
ENSMUSG00000061787.15	222.371	492.978	-1.31737	0.998918	-1.14856
ENSMUSG00000042439.13	956.547	697.428	1.20047	0.998915	0.455791
ENSMUSG00000034854.8	31.3057	12.895	1.2004	0.998914	1.27962
ENSMUSG00000043987.18	40.7816	16.835	1.20017	0.998913	1.27645
ENSMUSG00000038827.11	31.2503	81.607	-1.26222	0.99891	-1.38482
ENSMUSG00000026812.16	382.212	600.908	-1.09423	0.99891	-0.652772
ENSMUSG00000050812.18	753.693	475.691	1.21023	0.998909	0.663953
ENSMUSG00000035632.16	135.421	65.5404	1.2574	0.998909	1.047
ENSMUSG00000021913.8	141.901	63.1789	1.21064	0.998906	1.16737
ENSMUSG00000003585.13	58.4823	21.164	1.19892	0.998906	1.46639
ENSMUSG00000036585.16	664.446	377.166	1.21071	0.998906	0.81695
ENSMUSG00000000948.16	133.507	328.526	-1.47846	0.998905	-1.2991
ENSMUSG00000025931.15	591.468	905.035	-1.08551	0.998904	-0.613673
ENSMUSG00000037287.15	138.658	290.197	-1.31684	0.998904	-1.0655
ENSMUSG00000024426.17	410.516	246.589	1.08353	0.998903	0.735329
ENSMUSG00000030850.17	444.883	270.738	1.21128	0.998901	0.71653
ENSMUSG00000022346.16	14.1966	43.5474	-1.26138	0.9989	-1.61704
ENSMUSG00000027782.10	546.34	360.633	1.21152	0.9989	0.599268
ENSMUSG00000023025.16	424.537	612.415	-1.08607	0.998899	-0.52862
ENSMUSG00000038665.15	184.932	475.184	-1.31662	0.998899	-1.36149
ENSMUSG00000094936.8	221.599	383.521	-1.08624	0.998898	-0.79135
ENSMUSG00000038369.14	902.349	644.001	1.19748	0.998897	0.486622
ENSMUSG00000029071.16	46.9387	102.186	-1.08645	0.998896	-1.12235
ENSMUSG00000007617.18	270.642	708.35	-1.09261	0.998894	-1.38808
ENSMUSG00000041417.15	2469.45	1899.09	1.19695	0.998893	0.378883
ENSMUSG00000007989.7	307.161	596.28	-1.09212	0.998892	-0.956997
ENSMUSG00000113817.1	8.40816	22.7575	-1.08773	0.998891	-1.43648
ENSMUSG00000048000.15	513.075	859.669	-1.26051	0.998888	-0.744612
ENSMUSG00000045294.11	780.453	491.52	1.2131	0.998887	0.667063
ENSMUSG00000090362.2	392.195	617.178	-1.08912	0.998886	-0.654114
ENSMUSG00000030061.16	116.782	216.672	-1.08976	0.998885	-0.891686
ENSMUSG00000033730.4	110.791	329.21	-1.47929	0.998883	-1.57117
ENSMUSG00000024560.7	56.3624	27.4117	1.19511	0.998879	1.03994
ENSMUSG00000020108.4	234.24	113.098	1.21383	0.998879	1.05042
ENSMUSG00000028790.13	592.549	387.993	1.21383	0.998879	0.610905
ENSMUSG00000041037.8	118.329	33.8563	1.21389	0.998879	1.80531
ENSMUSG00000042675.15	142.914	69.8544	1.19479	0.998877	1.03272
ENSMUSG00000054611.17	533.489	821.232	-1.503	0.998876	-0.622331
ENSMUSG00000052593.16	224.517	86.0059	1.19419	0.998871	1.38432
ENSMUSG00000036023.6	74.1626	29.8454	1.25577	0.998871	1.31318
ENSMUSG00000021719.9	104.218	375.528	-1.25928	0.998871	-1.84932
ENSMUSG00000021975.9	142.946	65.4012	1.2148	0.998869	1.12808
ENSMUSG00000058267.13	27.5296	10.6066	1.21495	0.998867	1.37602
ENSMUSG00000035150.15	366.467	191.407	1.21502	0.998867	0.937042
ENSMUSG00000002205.16	40.846	88.7894	-1.25886	0.998864	-1.12019
ENSMUSG00000042570.14	32.9724	10.8213	1.19323	0.998863	1.60739
ENSMUSG00000001786.14	731.613	411.888	1.2154	0.998863	0.828828
ENSMUSG00000071866.12	1051.25	668.332	1.21545	0.998862	0.653475
ENSMUSG00000033209.17	105.28	210.622	-1.15502	0.998861	-1.00042
ENSMUSG00000059970.7	129.182	292.036	-1.28967	0.998859	-1.17674
ENSMUSG00000043991.5	906.784	589.517	1.19268	0.998858	0.621225
ENSMUSG00000024208.16	27.2265	71.0577	-1.04779	0.998857	-1.38398
ENSMUSG00000019916.14	150.545	288.17	-1.15521	0.998856	-0.936728
ENSMUSG00000027184.14	1053.69	734.361	1.25506	0.998854	0.520884
ENSMUSG00000068798.10	1084.66	721.93	1.16368	0.998852	0.587312
ENSMUSG00000026425.15	625.556	939.746	-1.15539	0.998851	-0.587131
ENSMUSG00000009681.10	238.884	545.353	-1.15541	0.998851	-1.19088
ENSMUSG00000022629.17	1814.18	1195.73	1.21665	0.998848	0.601419
ENSMUSG00000010453.12	67.9034	171.121	-1.31445	0.998844	-1.33347
ENSMUSG00000064370.1	26880.9	51333.3	-1.04731	0.998843	-0.933315
ENSMUSG00000027130.15	675.82	422.762	1.19089	0.998842	0.676795
ENSMUSG00000044068.7	320.7	186.4	1.2172	0.998841	0.782819
ENSMUSG00000028820.13	2134.41	1560.94	1.21739	0.998838	0.45142
ENSMUSG00000029050.15	591.586	914.534	-1.25681	0.998831	-0.628449
ENSMUSG00000045252.11	72.1544	22.8955	1.254	0.99883	1.65602
ENSMUSG00000004187.11	125.671	370.625	-1.29186	0.998828	-1.56031
ENSMUSG00000038774.9	489.509	290.844	1.2182	0.998828	0.751088
ENSMUSG00000032531.15	524.91	300.025	1.21846	0.998824	0.806987
ENSMUSG00000075595.9	795.429	459.647	1.25358	0.998821	0.791207
ENSMUSG00000052299.9	637.293	422.965	1.25352	0.99882	0.59142
ENSMUSG00000031540.14	1088.54	807.209	1.25348	0.998819	0.431386
ENSMUSG00000002222.14	808.409	565.023	1.07933	0.998819	0.516777
ENSMUSG00000034647.15	1006.6	2313.46	-1.256	0.998818	-1.20056
ENSMUSG00000057691.8	50.6604	22.3866	1.07929	0.998818	1.17822
ENSMUSG00000025408.15	129.077	256.551	-1.25597	0.998817	-0.991018
ENSMUSG00000024563.16	137.587	245.87	-1.29332	0.998807	-0.837549
ENSMUSG00000031748.16	3872.32	3147.82	1.25292	0.998807	0.298845
ENSMUSG00000020516.15	246.079	106.773	1.18596	0.9988	1.20458
ENSMUSG00000020576.10	1723.5	1287.41	1.22027	0.998799	0.420872
ENSMUSG00000034602.15	1395.57	970.462	1.2204	0.998797	0.524107
ENSMUSG00000037509.21	196.853	413.778	-1.31195	0.998795	-1.07174
ENSMUSG00000028030.12	296.194	512.578	-1.15753	0.998793	-0.791231
ENSMUSG00000034748.16	10.9867	27.0765	-1.29436	0.998793	-1.30128
ENSMUSG00000074892.9	770.88	474.796	1.07784	0.998787	0.699199
ENSMUSG00000021877.12	428.743	240.884	1.17033	0.998784	0.831772
ENSMUSG00000046201.9	502.639	263.646	1.17066	0.998781	0.930917
ENSMUSG00000021824.13	430.73	250.152	1.25148	0.998776	0.783977
ENSMUSG00000041408.18	888.77	625.378	1.17169	0.998775	0.507082
ENSMUSG00000038866.15	69.8218	208.311	-1.49707	0.998775	-1.57699
ENSMUSG00000023010.15	1387	945.717	1.1815	0.998773	0.552486
ENSMUSG00000073888.13	3.5288	11.5059	-1.29605	0.998772	-1.70512
ENSMUSG00000035247.16	1172.82	846.845	1.17257	0.998771	0.469808
ENSMUSG00000004040.16	360.794	647.261	-1.29612	0.998771	-0.843172
ENSMUSG00000031232.17	585.07	361.973	1.22234	0.99877	0.692727
ENSMUSG00000026748.13	1422.02	910.397	1.18064	0.998769	0.643376
ENSMUSG00000020790.14	480.065	284.914	1.18039	0.998768	0.752706
ENSMUSG00000029823.16	2258.74	1631.45	1.18025	0.998768	0.469368
ENSMUSG00000051007.15	21.4485	60.7983	-1.29642	0.998767	-1.50315
ENSMUSG00000020121.15	670.217	433.294	1.25098	0.998767	0.629284
ENSMUSG00000040263.16	75.282	32.0728	1.17985	0.998767	1.23095
ENSMUSG00000026112.7	214.385	63.1783	1.25096	0.998766	1.76271
ENSMUSG00000049957.14	77.2881	19.3165	1.22262	0.998766	2.00041
ENSMUSG00000038453.17	1982.6	1453.78	1.17912	0.998765	0.447583
ENSMUSG00000022742.6	806.858	477.603	1.1789	0.998765	0.756503
ENSMUSG00000060240.12	102.034	28.7139	1.07677	0.998765	1.82923
ENSMUSG00000020532.18	1708.62	1334.49	1.07676	0.998764	0.356547
ENSMUSG00000001774.8	246.373	426.052	-1.30992	0.998764	-0.790182
ENSMUSG00000032356.12	91.5768	421.88	-1.49616	0.998764	-2.20378
ENSMUSG00000050912.15	515.512	229.807	1.17562	0.998763	1.16559
ENSMUSG00000054920.12	321.199	578.734	-1.29691	0.998762	-0.849434
ENSMUSG00000058672.7	99.6901	233.187	-1.30934	0.998756	-1.22597
ENSMUSG00000051242.1	11.2999	37.5896	-1.15926	0.998751	-1.73403
ENSMUSG00000022129.4	12.8469	35.5676	-1.48679	0.998749	-1.46914
ENSMUSG00000028156.12	149.54	305.401	-1.29832	0.998748	-1.03017
ENSMUSG00000052915.14	331.22	188.987	1.24992	0.998747	0.809504
ENSMUSG00000004100.12	30.2548	78.9636	-1.29858	0.998746	-1.38402
ENSMUSG00000033909.17	62.1597	132.941	-1.15953	0.998745	-1.09673
ENSMUSG00000030811.14	20.172	82.0089	-1.49416	0.998745	-2.02343
ENSMUSG00000021716.14	32.6559	99.1753	-1.48787	0.998741	-1.60264
ENSMUSG00000011831.16	125.253	341.836	-1.49344	0.998741	-1.44846
ENSMUSG00000026275.13	205.291	400.328	-1.29936	0.998738	-0.963515
ENSMUSG00000028194.15	135.381	372.851	-1.49089	0.998732	-1.46158
ENSMUSG00000057098.14	548.734	970.393	-1.4916	0.998732	-0.822463
ENSMUSG00000054280.14	822.823	556.238	1.07495	0.998726	0.564879
ENSMUSG00000033419.16	206.626	71.7439	1.07493	0.998726	1.52609
ENSMUSG00000039844.20	406.138	650.666	-1.30308	0.998722	-0.679947
ENSMUSG00000028657.14	241.361	116.297	1.22576	0.998722	1.05338
ENSMUSG00000028634.17	233.036	387.981	-1.04336	0.998721	-0.735432
ENSMUSG00000020680.15	266.029	148.045	1.22595	0.998719	0.845548
ENSMUSG00000009569.14	296.006	596.729	-1.16074	0.998716	-1.01145
ENSMUSG00000024777.10	147.53	60.5232	1.22618	0.998716	1.28545
ENSMUSG00000026036.17	83.3245	31.711	1.24692	0.998698	1.39376
ENSMUSG00000011752.7	265.417	490.598	-1.04263	0.998697	-0.88628
ENSMUSG00000070738.10	418.275	248.163	1.07324	0.998691	0.753166
ENSMUSG00000024642.17	308.012	483.798	-1.24919	0.998681	-0.65142
ENSMUSG00000037742.14	8260.14	6185.91	1.22939	0.998677	0.417179
ENSMUSG00000028274.17	105.051	189.594	-1.04202	0.998676	-0.851823
ENSMUSG00000046897.17	363.212	198.752	1.07237	0.998674	0.86984
ENSMUSG00000019809.16	140.352	66.0264	1.22978	0.998673	1.08794
ENSMUSG00000006728.12	103.944	44.6143	1.22981	0.998672	1.22022
ENSMUSG00000002985.16	2850.48	3668.87	-1.16348	0.998659	-0.364132
ENSMUSG00000031314.18	813.262	560.804	1.24354	0.998657	0.536224
ENSMUSG00000056268.15	326.017	632.746	-1.24815	0.998657	-0.956679
ENSMUSG00000115890.1	22.7665	55.8654	-1.16375	0.998654	-1.29505
ENSMUSG00000040462.13	472.625	262.449	1.24271	0.998649	0.84866
ENSMUSG00000037373.12	503.533	285.903	1.2417	0.998642	0.81656
ENSMUSG00000055945.8	1427.86	875.923	1.23337	0.998641	0.704984
ENSMUSG00000040423.11	1110.07	806.64	1.2335	0.99864	0.460657
ENSMUSG00000040078.9	85.9047	21.5515	1.24125	0.998639	1.99495
ENSMUSG00000074748.3	660.527	413.393	1.23474	0.998635	0.676103
ENSMUSG00000020385.16	832.725	518.349	1.07019	0.998631	0.683916
ENSMUSG00000044252.18	1239.6	833.677	1.23963	0.998631	0.572318
ENSMUSG00000034245.10	447.191	236.547	1.23909	0.99863	0.918763
ENSMUSG00000022378.14	606.495	385.225	1.23761	0.998629	0.654792
ENSMUSG00000045215.17	466.407	287.68	1.06979	0.998624	0.697127
ENSMUSG00000064368.1	1049.74	2338	-1.24675	0.998623	-1.15525
ENSMUSG00000026858.18	75.223	20.7834	1.06846	0.9986	1.85574
ENSMUSG00000024304.14	466.94	845.123	-1.24561	0.998595	-0.855926
ENSMUSG00000069662.5	1144.39	1487.79	-1.16723	0.998593	-0.378597
ENSMUSG00000063296.5	175.156	81.6105	1.06777	0.998588	1.10181
ENSMUSG00000040785.19	1203.11	2494.89	-1.1686	0.998572	-1.05221
ENSMUSG00000024429.9	82.3119	188.454	-1.03881	0.998553	-1.19504
ENSMUSG00000040118.15	60.7069	249.799	-1.2434	0.998538	-2.04084
ENSMUSG00000036792.12	191.613	328.32	-1.17109	0.998537	-0.776907
ENSMUSG00000024423.6	490.714	271.024	1.06367	0.998531	0.85646
ENSMUSG00000042726.14	181.933	72.1462	1.06335	0.998527	1.33442
ENSMUSG00000022505.9	36.6237	95.8388	-1.2428	0.998521	-1.38783
ENSMUSG00000111939.1	73.7684	168.336	-1.17237	0.99852	-1.19026
ENSMUSG00000094483.2	1193.91	2231.39	-1.17324	0.998509	-0.902251
ENSMUSG00000040624.18	1193.2	862.093	1.0611	0.998504	0.468924
ENSMUSG00000022100.14	558.656	387.517	1.06063	0.9985	0.527701
ENSMUSG00000031601.16	232.787	358.485	-1.03758	0.9985	-0.6229
ENSMUSG00000031985.9	202.42	116.227	1.05972	0.998493	0.800413
ENSMUSG00000031812.16	741.719	522.493	1.05903	0.998488	0.505461
ENSMUSG00000024897.9	649.968	381.074	1.05878	0.998486	0.770298
ENSMUSG00000027652.15	732.012	520.199	1.05654	0.998477	0.492805
ENSMUSG00000029405.16	624.344	401.235	1.05607	0.998475	0.637894
ENSMUSG00000015536.14	55.6738	23.936	1.05595	0.998474	1.21782
ENSMUSG00000032050.18	1914.38	1406.74	1.05558	0.998473	0.444517
ENSMUSG00000048142.9	25.5606	123.26	-1.17631	0.998473	-2.26971
ENSMUSG00000020883.18	311.916	187.034	1.05535	0.998473	0.73786
ENSMUSG00000031600.11	735.537	498.607	1.05377	0.99847	0.560894
ENSMUSG00000077450.13	503.811	326.663	1.05343	0.998469	0.625082
ENSMUSG00000005907.14	266.077	150.38	1.05296	0.998469	0.823226
ENSMUSG00000032898.9	550.854	353.416	1.05173	0.998468	0.640302
ENSMUSG00000032724.5	298.291	172.824	1.05008	0.998468	0.787422
ENSMUSG00000029053.16	779.649	478.476	1.04913	0.998467	0.704377
ENSMUSG00000007570.16	60.6994	21.7564	1.04763	0.998466	1.48025
ENSMUSG00000028330.8	157.37	86.692	1.04696	0.998466	0.86019
ENSMUSG00000024197.10	294.518	159.497	1.04672	0.998465	0.884826
ENSMUSG00000036990.13	557.802	360.888	1.04576	0.998463	0.628203
ENSMUSG00000040354.14	45.1423	112.917	-1.24037	0.998455	-1.32271
ENSMUSG00000042520.16	713.073	470.196	1.04269	0.998451	0.600788
ENSMUSG00000020668.10	695.21	442.645	1.04268	0.998451	0.651298
ENSMUSG00000037111.9	1057.62	776.902	1.04261	0.998451	0.445017
ENSMUSG00000025786.17	186.454	91.6627	1.04231	0.998449	1.02441
ENSMUSG00000068823.10	1839.85	1462.14	1.03853	0.998416	0.33151
ENSMUSG00000021486.7	126.902	49.1406	1.03696	0.998392	1.36873
ENSMUSG00000052144.8	454.28	297.991	1.03639	0.998383	0.608314
ENSMUSG00000020882.17	25.041	93.9142	-1.18461	0.998375	-1.90705
ENSMUSG00000019970.15	1907.27	895.031	1.03518	0.998364	1.0915
ENSMUSG00000024960.9	60.6376	147.718	-1.18584	0.998359	-1.28457
ENSMUSG00000023966.8	9.63709	29.4142	-1.03443	0.998358	-1.60984
ENSMUSG00000058793.14	982.475	679.055	1.03489	0.998358	0.532891
ENSMUSG00000057378.15	27.3162	132.65	-1.18599	0.998357	-2.2798
ENSMUSG00000052812.5	588.485	852.175	-1.18668	0.998347	-0.534144
ENSMUSG00000064345.1	23780.2	55813.1	-1.1872	0.99834	-1.23084
ENSMUSG00000034563.16	489.242	307.733	1.03405	0.99834	0.668869
ENSMUSG00000102070.1	17922.1	37975.2	-1.18753	0.998336	-1.08332
ENSMUSG00000036333.11	1398.24	1774.55	-1.18757	0.998335	-0.343845
ENSMUSG00000022023.6	66.4264	163.539	-1.23604	0.998332	-1.2998
ENSMUSG00000018322.10	134.244	273.516	-1.18779	0.998332	-1.02676
ENSMUSG00000026135.17	195.887	347.05	-1.23592	0.998329	-0.825125
ENSMUSG00000059995.12	69.4864	199.282	-1.18818	0.998326	-1.52001
ENSMUSG00000003360.15	182.644	314.223	-1.23582	0.998326	-0.782755
ENSMUSG00000002031.13	102.333	227.037	-1.18826	0.998325	-1.14966
ENSMUSG00000033032.15	321.97	180.561	1.03299	0.998317	0.834444
ENSMUSG00000053646.13	522.94	873.682	-1.23534	0.998313	-0.740463
ENSMUSG00000048058.17	357.661	216.565	1.0326	0.998309	0.723794
ENSMUSG00000078570.10	9.72689	34.827	-1.18939	0.998308	-1.84016
ENSMUSG00000031955.10	525.36	349.79	1.03112	0.998271	0.586819
ENSMUSG00000000738.18	102.548	235.361	-1.23367	0.998266	-1.19858
ENSMUSG00000027304.9	139.22	298.075	-1.19212	0.998265	-1.09831
ENSMUSG00000022387.17	214.254	386.713	-1.23351	0.998262	-0.851937
ENSMUSG00000075318.13	139.38	482.57	-1.19339	0.998244	-1.79172
ENSMUSG00000042523.12	153.823	432.705	-1.23217	0.998226	-1.49211
ENSMUSG00000044465.19	58.8825	29.7532	1.02898	0.998214	0.984792
ENSMUSG00000029020.13	220.171	113.28	1.02895	0.998213	0.958738
ENSMUSG00000052748.14	239.184	116.079	1.02894	0.998213	1.04302
ENSMUSG00000036931.15	35.0246	96.0576	-1.23107	0.998197	-1.45553
ENSMUSG00000064367.1	20074.4	50143.5	-1.19635	0.998192	-1.32071
ENSMUSG00000021767.19	496.331	795.714	-1.23082	0.99819	-0.680947
ENSMUSG00000027406.13	106.635	218.587	-1.197	0.99818	-1.03553
ENSMUSG00000020657.16	56.6554	128.782	-1.19781	0.998166	-1.18465
ENSMUSG00000110519.2	654.703	1102.49	-1.22977	0.998164	-0.751859
ENSMUSG00000024462.17	1261.09	1735.55	-1.19822	0.998158	-0.460724
ENSMUSG00000057572.15	199.093	114.973	1.02699	0.998155	0.792149
ENSMUSG00000063659.11	312.643	688.874	-1.19874	0.998149	-1.13972
ENSMUSG00000066571.13	757.065	484.876	1.02652	0.998141	0.642802
ENSMUSG00000047714.14	270.181	528.557	-1.19934	0.998139	-0.96813
ENSMUSG00000019877.10	2477.04	1854.18	1.02631	0.998134	0.417836
ENSMUSG00000028669.15	29.873	89.0959	-1.20079	0.998113	-1.57652
ENSMUSG00000049804.9	73.4954	211.342	-1.20098	0.99811	-1.52385
ENSMUSG00000006299.13	215.384	118.67	0.979537	0.998077	0.859953
ENSMUSG00000001036.17	1421.22	1052.01	0.981288	0.998076	0.433983
ENSMUSG00000038375.15	1000.08	583.209	0.981613	0.998076	0.778036
ENSMUSG00000030096.8	1070.21	731.159	0.978613	0.998076	0.549631
ENSMUSG00000003518.13	825.855	602.677	0.978238	0.998074	0.454503
ENSMUSG00000050668.10	133.606	72.6905	1.02434	0.998073	0.878144
ENSMUSG00000022889.7	97.1451	40.0228	0.982674	0.998071	1.27932
ENSMUSG00000041459.15	579.999	397.865	1.02413	0.998066	0.543774
ENSMUSG00000024740.10	817.873	570.154	1.02413	0.998066	0.520525
ENSMUSG00000040596.15	1055.05	777.072	0.983816	0.998065	0.441185
ENSMUSG00000052751.16	62.6994	32.7754	0.976003	0.998064	0.935837
ENSMUSG00000022637.11	305.934	182.473	0.975808	0.998062	0.745541
ENSMUSG00000039414.10	285.264	180.703	0.985051	0.998057	0.658675
ENSMUSG00000020402.11	230.275	112.119	0.985114	0.998056	1.03833
ENSMUSG00000034570.12	48.6696	113.394	-1.22469	0.998055	-1.22025
ENSMUSG00000027423.15	711.101	475.496	1.02375	0.998054	0.580621
ENSMUSG00000020949.9	166.878	80.8574	0.974559	0.99805	1.04534
ENSMUSG00000063065.13	595.072	385.667	0.974199	0.998046	0.625708
ENSMUSG00000096780.7	109.375	259.004	-1.2238	0.99804	-1.2437
ENSMUSG00000025907.14	796.296	553.163	1.02261	0.998019	0.525602
ENSMUSG00000039086.9	69.9568	29.1788	1.02242	0.998014	1.26154
ENSMUSG00000026048.16	49.1356	107.961	-1.22184	0.99801	-1.13567
ENSMUSG00000023019.12	307.573	196.071	0.971066	0.998006	0.649551
ENSMUSG00000038619.12	262.777	157.076	1.02215	0.998005	0.742379
ENSMUSG00000116034.1	62.0887	139.673	-1.20809	0.998004	-1.16964
ENSMUSG00000002210.11	83.322	32.727	0.970839	0.998003	1.34822
ENSMUSG00000020029.6	1459.29	1041.56	0.970683	0.998001	0.486527
ENSMUSG00000038696.14	241.114	140.411	0.98956	0.998	0.780056
ENSMUSG00000007812.16	230.616	427.458	-1.22085	0.997998	-0.890286
ENSMUSG00000029094.12	370.322	238.641	0.989831	0.997996	0.633935
ENSMUSG00000001910.5	223.696	387.855	-1.22026	0.997991	-0.793979
ENSMUSG00000041203.9	49.6428	21.5026	1.02155	0.997987	1.20708
ENSMUSG00000039100.10	569.025	881.73	-1.21	0.997986	-0.631844
ENSMUSG00000094030.1	82.35	198.127	-1.21113	0.997976	-1.26659
ENSMUSG00000033174.17	157.362	324.11	-1.21833	0.997976	-1.0424
ENSMUSG00000024140.10	495.182	710.605	-1.21656	0.997966	-0.52109
ENSMUSG00000018965.11	250.075	676.829	-1.21426	0.997964	-1.43643
ENSMUSG00000039967.14	627.902	934.682	-1.2141	0.997963	-0.573936
ENSMUSG00000027523.20	1233.47	2374.41	-1.21401	0.997963	-0.944844
ENSMUSG00000052298.12	841.031	584.183	1.02021	0.997947	0.525738
ENSMUSG00000028691.12	883.598	609.713	0.992958	0.997943	0.535261
ENSMUSG00000026778.13	669.842	454.222	0.967109	0.997935	0.560422
ENSMUSG00000020792.15	174.894	100.668	0.994425	0.997916	0.796874
ENSMUSG00000031532.7	615.052	399.586	1.01897	0.997914	0.622203
ENSMUSG00000022538.20	61.2872	20.2628	1.01882	0.99791	1.59675
ENSMUSG00000021096.11	706.997	446.543	0.965944	0.997907	0.662905
ENSMUSG00000041058.15	668.593	479.968	0.995405	0.997898	0.47819
ENSMUSG00000026987.16	1847.25	1403.75	1.01816	0.997892	0.396093
ENSMUSG00000025791.18	81.3589	161.633	-1.02527	0.997868	-0.990349
ENSMUSG00000035954.10	1024.34	1282.66	-1.02524	0.997866	-0.324449
ENSMUSG00000031641.14	64.672	28.5444	1.01646	0.997851	1.17993
ENSMUSG00000007589.9	72.2042	35.9294	0.963266	0.997839	1.00692
ENSMUSG00000046240.8	1370.5	1021.65	1.01545	0.997829	0.423803
ENSMUSG00000006673.14	640.388	432.663	0.962865	0.997828	0.565702
ENSMUSG00000042613.9	119.28	45.1158	1.01485	0.997816	1.40264
ENSMUSG00000021266.16	87.8185	189.037	-1.02431	0.997812	-1.10607
ENSMUSG00000045730.4	20.7859	6.28039	0.962249	0.99781	1.72668
ENSMUSG00000035762.11	208.87	104.135	1.01425	0.997804	1.00415
ENSMUSG00000038271.17	593.226	421.648	1.00124	0.997798	0.492543
ENSMUSG00000031428.11	77.3477	188.37	-1.02401	0.997794	-1.28414
ENSMUSG00000066551.12	1033.16	749.447	1.00219	0.997784	0.463168
ENSMUSG00000027804.13	265.467	146.68	1.01239	0.997778	0.855859
ENSMUSG00000078427.3	59.6471	124.153	-1.02367	0.997774	-1.05759
ENSMUSG00000040537.17	967.975	631.187	1.01168	0.997768	0.616903
ENSMUSG00000028347.14	1331.96	979.54	1.00436	0.997763	0.44337
ENSMUSG00000023852.14	589.855	406.131	1.00481	0.997759	0.538416
ENSMUSG00000038965.17	556.048	378.417	1.00978	0.997755	0.555233
ENSMUSG00000028889.17	28.0995	8.01003	0.960437	0.997754	1.81066
ENSMUSG00000013523.13	4183.39	3056.16	1.00532	0.997754	0.45295
ENSMUSG00000024054.14	451.706	310.464	1.00536	0.997754	0.540955
ENSMUSG00000038280.12	194.43	103.408	1.00547	0.997753	0.910907
ENSMUSG00000008475.13	413.588	254.132	1.00579	0.997751	0.702614
ENSMUSG00000022321.15	572.965	333.29	1.00674	0.99775	0.781667
ENSMUSG00000032826.19	6654.2	5520.29	1.00724	0.997749	0.26952
ENSMUSG00000069808.13	357.857	204.271	0.959564	0.997725	0.808899
ENSMUSG00000018412.16	436.53	659.172	-1.02145	0.997642	-0.594574
ENSMUSG00000026014.15	175.831	336.144	-1.02076	0.9976	-0.93489
ENSMUSG00000113961.1	448.167	726.597	-1.02042	0.99758	-0.697121
ENSMUSG00000025027.18	155.021	270.836	-1.01912	0.997502	-0.804961
ENSMUSG00000037012.18	149.686	326.159	-1.0191	0.997501	-1.12364
ENSMUSG00000027854.12	78.8464	41.3076	0.952235	0.997431	0.932637
ENSMUSG00000005625.15	212.638	125.984	0.951932	0.997416	0.755157
ENSMUSG00000034928.16	284.007	480.129	-1.01655	0.997349	-0.757492
ENSMUSG00000028354.13	168.255	308.442	-1.0164	0.99734	-0.874351
ENSMUSG00000052889.11	342.276	1007.38	-1.0162	0.997329	-1.55737
ENSMUSG00000018567.14	308.382	179.104	0.949745	0.997308	0.78392
ENSMUSG00000061778.10	203.609	109.017	0.949654	0.997304	0.901258
ENSMUSG00000032782.19	18.6988	41.6181	-1.0156	0.997293	-1.15426
ENSMUSG00000025736.15	20.1827	48.5318	-1.01526	0.997273	-1.26581
ENSMUSG00000021111.15	578.521	774.23	-1.01491	0.997253	-0.420395
ENSMUSG00000041498.13	5.25554	11.4544	-1.01445	0.997227	-1.12399
ENSMUSG00000027087.11	1500.08	1082.54	0.947918	0.997212	0.470625
ENSMUSG00000020015.10	395.651	236.407	0.947327	0.99718	0.742957
ENSMUSG00000032803.15	591.169	412.04	0.947322	0.99718	0.520787
ENSMUSG00000063894.15	122.851	206.495	-1.0131	0.99715	-0.749192
ENSMUSG00000026740.12	247.936	376.697	-0.942208	0.997144	-0.603439
ENSMUSG00000000594.7	182.933	299.937	-0.943364	0.997143	-0.71334
ENSMUSG00000079317.10	86.264	162.644	-0.938842	0.997139	-0.91489
[truncated: 1,507 more rows]

## Sheet: 4
	SHAM FEAR_mean	SHAM NOT FEAR_mean	theta	prob	log2FC
ENSMUSG00000063297.7	919.228	2005.48	-2.13491	1	-1.12545
ENSMUSG00000055254.15	2037.35	3677.1	-1.8811	1	-0.851875
ENSMUSG00000005089.15	14629	32404.4	-2.33691	0.999989	-1.14735
ENSMUSG00000026737.12	1863.63	1051.85	1.73928	0.999954	0.825196
ENSMUSG00000027674.16	2758.18	1588.65	1.6633	0.999758	0.795914
ENSMUSG00000029309.7	5149.43	9051.08	-2.58444	0.999697	-0.813676
ENSMUSG00000037996.17	3344.17	2116.21	1.65669	0.999563	0.660165
ENSMUSG00000021270.13	5362.75	3701.88	1.65272	0.999387	0.534717
ENSMUSG00000023944.14	5416.92	3788.62	1.64582	0.99894	0.515803
ENSMUSG00000005360.14	2083.86	3921.9	-1.78871	0.99774	-0.912298
ENSMUSG00000028517.8	1336.85	2447.19	-1.6536	0.995763	-0.872284
ENSMUSG00000116014.1	2.78022	30.9485	-1.63716	0.994879	-3.4766
ENSMUSG00000029778.12	326.264	789.842	-1.66548	0.993609	-1.27553
ENSMUSG00000094910.1	73.1423	346.807	-1.50727	0.989713	-2.24536
ENSMUSG00000013353.10	23.4541	115.511	-1.68286	0.987053	-2.30012
ENSMUSG00000037852.8	2559.64	6021.69	-1.75474	0.986795	-1.23423
ENSMUSG00000048960.13	915.512	1724.96	-1.46316	0.985642	-0.91391
ENSMUSG00000116594.1	10.6793	52.822	-1.44328	0.984718	-2.30633
ENSMUSG00000024140.10	595.555	1233.08	-1.44214	0.984677	-1.04996
ENSMUSG00000030428.16	1557.77	2744.94	-1.43608	0.984332	-0.817293
ENSMUSG00000004558.15	1458.91	2536.2	-1.42325	0.982249	-0.797773
ENSMUSG00000020456.17	750.569	349.565	1.43524	0.97571	1.10242
ENSMUSG00000017390.15	1069.35	2145.21	-1.71774	0.975323	-1.00439
ENSMUSG00000018411.17	2466.16	1644.24	1.57523	0.970987	0.584846
ENSMUSG00000060012.9	2598.11	1209.14	1.4126	0.968723	1.10348
ENSMUSG00000091945.2	720.619	1641.2	-1.39114	0.966308	-1.18744
ENSMUSG00000022037.15	1601.72	2601.22	-1.39071	0.966029	-0.699561
ENSMUSG00000058254.12	1135.57	2159.26	-1.58117	0.966022	-0.927121
ENSMUSG00000096002.2	2699.84	6003.92	-1.5632	0.964318	-1.15303
ENSMUSG00000030849.18	2200.04	1453.34	1.3258	0.962353	0.598162
ENSMUSG00000081236.1	17.9937	3.29537	0.88353	0.96119	2.44898
ENSMUSG00000024044.19	2529.76	1669.41	1.56158	0.961183	0.599664
ENSMUSG00000022892.11	7531.19	6136.99	0.884239	0.961169	0.295346
ENSMUSG00000038495.14	1835.93	1363.84	0.884867	0.961144	0.428839
ENSMUSG00000026131.20	14966.4	11422	1.56145	0.961084	0.389903
ENSMUSG00000022514.14	1106.92	720.686	0.886526	0.961046	0.619114
ENSMUSG00000034154.15	359.629	148.704	0.887748	0.960946	1.27407
ENSMUSG00000045482.16	1042.64	740.23	0.873689	0.960697	0.494192
ENSMUSG00000033161.10	1219.35	772.742	0.873645	0.960691	0.658059
ENSMUSG00000036580.15	859.924	462.683	1.31283	0.960507	0.894183
ENSMUSG00000008153.12	235.845	92.8138	0.896366	0.959625	1.34542
ENSMUSG00000026163.17	265.556	67.288	0.866869	0.959555	1.9806
ENSMUSG00000006651.8	5367.52	4357.88	0.866486	0.959474	0.300629
ENSMUSG00000074582.10	652.457	356.406	0.898462	0.959153	0.872361
ENSMUSG00000041607.17	107634	64983.4	0.863413	0.958772	0.727993
ENSMUSG00000027660.16	1034.15	510.645	0.900082	0.958752	1.01806
ENSMUSG00000023999.14	185.439	63.2854	0.900354	0.958682	1.551
ENSMUSG00000022472.16	1453.76	1019.17	0.862839	0.958632	0.512396
ENSMUSG00000030451.16	1783.11	1197	1.30472	0.958619	0.574973
ENSMUSG00000025162.18	414.036	233.243	0.861803	0.95837	0.827925
ENSMUSG00000020774.9	1379.54	935.673	0.903004	0.957961	0.560107
ENSMUSG00000020900.15	471.577	253.299	0.856425	0.956881	0.896654
ENSMUSG00000032826.19	6544.95	4864.84	1.46673	0.956863	0.42799
ENSMUSG00000034243.17	1154.35	748.524	0.856183	0.95681	0.624961
ENSMUSG00000054693.14	735.376	433.425	0.855823	0.956704	0.762698
ENSMUSG00000021573.15	3259.26	2578.79	0.855483	0.956603	0.337851
ENSMUSG00000026490.18	4075.51	3209.9	0.908023	0.956432	0.344453
ENSMUSG00000045962.16	8711.39	6516.88	0.908279	0.956349	0.41872
ENSMUSG00000034751.17	2349.47	1607.65	1.29072	0.956157	0.547386
ENSMUSG00000035776.14	182.58	60.6809	0.909234	0.956038	1.58921
ENSMUSG00000075091.5	27.0371	7.74067	0.852429	0.955678	1.80441
ENSMUSG00000020331.9	859.931	248.231	1.46883	0.955086	1.79254
ENSMUSG00000027281.16	21.564	84.551	-1.22408	0.955083	-1.97119
ENSMUSG00000032517.16	43090	26434.9	0.850318	0.955025	0.704907
ENSMUSG00000039840.8	419.387	235.858	0.850169	0.954979	0.830363
ENSMUSG00000043733.14	1715.58	1108.46	0.912723	0.95487	0.630144
ENSMUSG00000014956.15	1570.69	1147	0.912918	0.954804	0.453539
ENSMUSG00000032181.7	878.574	1408.65	-1.37317	0.954721	-0.681081
ENSMUSG00000036371.6	1138.99	720.758	0.913346	0.954658	0.66017
ENSMUSG00000031144.15	280.117	124.225	0.848953	0.9546	1.17307
ENSMUSG00000029823.16	2356.97	1705.98	0.913537	0.954593	0.466335
ENSMUSG00000075289.5	256.399	118.216	0.913553	0.954587	1.11696
ENSMUSG00000030064.16	1303.22	868.306	0.848659	0.954508	0.5858
ENSMUSG00000075232.6	1039.15	677.116	0.847748	0.954224	0.617923
ENSMUSG00000020015.10	515.754	307.755	0.91517	0.954033	0.744902
ENSMUSG00000034377.10	6435.95	4806.39	0.846443	0.953819	0.4212
ENSMUSG00000022048.8	4852.89	3608.26	1.24561	0.953763	0.427541
ENSMUSG00000060261.15	1147.34	832.084	0.845896	0.953649	0.463494
ENSMUSG00000026421.14	2217.61	1671.43	0.845553	0.953543	0.407927
ENSMUSG00000024665.8	422.276	821.905	-1.23102	0.953538	-0.960785
ENSMUSG00000020048.13	2239.46	1593.07	0.917322	0.953295	0.491341
ENSMUSG00000020530.14	467.133	240.569	0.844619	0.953256	0.95738
ENSMUSG00000030101.15	106.017	34.9368	0.844391	0.953187	1.60148
ENSMUSG00000017734.15	2509.46	1315.07	1.09075	0.952911	0.932234
ENSMUSG00000028577.13	344.564	120.72	1.09233	0.952909	1.51311
ENSMUSG00000068747.14	1873.19	1259.58	1.09245	0.952907	0.572558
ENSMUSG00000022463.8	1148.29	685.703	1.08923	0.952875	0.743833
ENSMUSG00000045180.13	974.088	637.273	1.08891	0.952864	0.612141
ENSMUSG00000038077.7	1182.62	751.904	1.09459	0.952841	0.653362
ENSMUSG00000041417.15	2180.47	1668.94	1.08689	0.952756	0.3857
ENSMUSG00000039361.11	2717.7	1921.14	1.08509	0.952612	0.500418
ENSMUSG00000040265.16	2019.55	1459.84	0.919729	0.952475	0.468228
ENSMUSG00000028945.9	262.547	126.872	0.840786	0.952105	1.0492
ENSMUSG00000075415.13	4439.04	3369.64	1.35883	0.9519	0.397652
ENSMUSG00000018707.13	5891.51	4615.81	0.839191	0.951644	0.352055
ENSMUSG00000059974.10	311.816	655.003	-1.20654	0.951614	-1.07081
ENSMUSG00000068457.14	448.822	1040.79	-1.36803	0.951418	-1.21346
ENSMUSG00000027993.16	2221.15	1510.09	1.38813	0.951307	0.556668
ENSMUSG00000038936.13	652.19	376.157	0.923285	0.951299	0.793957
ENSMUSG00000030660.9	883.612	577.883	0.924188	0.951008	0.612635
ENSMUSG00000039601.16	1045.67	612.895	1.10811	0.950845	0.770723
ENSMUSG00000027339.15	1198.99	808.423	0.836198	0.950818	0.568639
ENSMUSG00000025428.15	991.934	617.576	0.925445	0.950614	0.683627
ENSMUSG00000049323.8	403.221	115.327	1.07253	0.950508	1.80584
ENSMUSG00000030302.16	708.754	343.28	1.36263	0.950304	1.0459
ENSMUSG00000029467.15	1804.91	1344.84	0.833909	0.950227	0.424485
ENSMUSG00000039953.13	1177.88	883.963	0.833441	0.950111	0.414131

## Sheet: 5
ID	Description	GeneRatio	BgRatio	pvalue	p.adjust	qvalue	geneID	Count
GO:0099537	trans-synaptic signaling	163/2289	234/4318	7.3101e-08	0.000115368	0.000106291	Ctnnd2/Slc24a2/Cntn2/Gabra4/Syt7/Hap1/Clstn3/Cplx2/Cacna1a/Dgkb/Sipa1l1/Syn2/Igsf9b/Nrxn1/Ntrk2/Agt/Shank3/Kalrn/Atp2b2/Clstn1/Prkce/Ptprd/Cyth1/Tenm2/Fam107a/Ppp1r9b/Tbc1d24/Eif4e/Mtmr2/App/Efnb3/Farp1/Mapt/Dvl1/Tubb2b/Cacna1e/Pclo/Ppp3ca/Ppp3r1/Prkcb/Shisa9/Dbn1/Mapk1/Atp2a2/Slc12a5/Syp/Nlgn3/Prkar2a/Ric3/Egfr/Dgki/Nlgn2/Abat/Ptk2b/Srf/Ywhag/Snap91/Kras/Pink1/Nat8l/Rab11a/Slc1a3/Tmod2/Dlg4/Gucy…	163
GO:0098609	cell-cell adhesion	131/2289	183/4318	1.22298e-07	0.000115368	0.000106291	Dmtn/Ctnnd2/Clstn3/Thy1/Bcl2/Cyfip2/Epha7/Igsf9b/Nrxn1/Nrcam/Mag/Plxnb3/Clstn1/Adgrl1/Ptprd/Pip5k1c/Sparcl1/Pik3cb/Tenm2/Dlg5/Plpp3/Lrrc7/Pkp4/Efnb3/Astn1/Gnas/Irf1/Ptprt/Aqp4/Elmo2/Itgav/Rpsa/Nlgn3/Sdc4/Adgrl3/Egfr/Negr1/Nlgn2/Abat/Srf/Robo1/Mbp/Dlg4/Nlgn1/Serpine2/Ptprs/Golph3/Ncam1/Cd9/Celsr2/Dab1/Ptprf/Pcdh1/Ttyh1/Zfp609/Cd99l2/Prkcq/Jup/Zbtb7b/Vmp1/Prdx2/Kirrel3/Tnr/Pcdhgc3/Cxcl12/Dscaml1/Cd…	131
GO:0007155	cell adhesion	219/2289	329/4318	1.519e-07	0.000115368	0.000106291	Apc/Dmtn/Ctnnd2/Lrp1/Cntn2/Clstn3/Thy1/Flrt1/Bcl2/Cyfip2/Epha7/Igsf9b/Lsamp/Nrxn1/Agt/Nrcam/Clasp2/Mag/Plxnb3/Clstn1/Prkce/Adgrl1/Ptprd/Pip5k1c/Sparcl1/Pik3cb/Tenm2/Fam107a/Utrn/Dlg5/Myh10/Plpp3/Lrrc7/Pkp4/App/Efnb3/Astn1/Atp1b2/Gnas/Irf1/Ptprt/Aqp4/Ppp3ca/Elmo2/Itgav/Rpsa/Dbn1/Plxnc1/Nlgn3/Sdc4/Adgrl3/Atp5b/Ppp1cb/Spock2/Macf1/Egfr/Negr1/Nlgn2/Abat/Ptk2b/Srf/Robo1/Epha5/Pcdhgc5/Mbp/Dlg4/Nlgn1/Tf…	219
GO:0099536	synaptic signaling	165/2289	239/4318	1.59228e-07	0.000115368	0.000106291	Ctnnd2/Slc24a2/Cntn2/Gabra4/Syt7/Hap1/Clstn3/Cplx2/Cacna1a/Dgkb/Sipa1l1/Syn2/Igsf9b/Nrxn1/Ntrk2/Agt/Shank3/Kalrn/Atp2b2/Clstn1/Prkce/Ptprd/Cyth1/Tenm2/Fam107a/Ppp1r9b/Tbc1d24/Eif4e/Mtmr2/App/Efnb3/Farp1/Mapt/Dvl1/Tubb2b/Cacna1e/Pclo/Ppp3ca/Ppp3r1/Prkcb/Shisa9/Dbn1/Mapk1/Atp2a2/Slc12a5/Syp/Nlgn3/Prkar2a/Ric3/Egfr/Dgki/Nlgn2/Abat/Ptk2b/Srf/Ywhag/Snap91/Kras/Pink1/Nat8l/Rab11a/Slc1a3/Tmod2/Dlg4/Gucy…	165
GO:0022610	biological adhesion	219/2289	330/4318	2.19582e-07	0.000115368	0.000106291	Apc/Dmtn/Ctnnd2/Lrp1/Cntn2/Clstn3/Thy1/Flrt1/Bcl2/Cyfip2/Epha7/Igsf9b/Lsamp/Nrxn1/Agt/Nrcam/Clasp2/Mag/Plxnb3/Clstn1/Prkce/Adgrl1/Ptprd/Pip5k1c/Sparcl1/Pik3cb/Tenm2/Fam107a/Utrn/Dlg5/Myh10/Plpp3/Lrrc7/Pkp4/App/Efnb3/Astn1/Atp1b2/Gnas/Irf1/Ptprt/Aqp4/Ppp3ca/Elmo2/Itgav/Rpsa/Dbn1/Plxnc1/Nlgn3/Sdc4/Adgrl3/Atp5b/Ppp1cb/Spock2/Macf1/Egfr/Negr1/Nlgn2/Abat/Ptk2b/Srf/Robo1/Epha5/Pcdhgc5/Mbp/Dlg4/Nlgn1/Tf…	219
GO:0007268	chemical synaptic transmission	159/2289	230/4318	2.36478e-07	0.000115368	0.000106291	Ctnnd2/Slc24a2/Cntn2/Gabra4/Syt7/Hap1/Clstn3/Cplx2/Cacna1a/Dgkb/Sipa1l1/Syn2/Igsf9b/Nrxn1/Ntrk2/Agt/Shank3/Kalrn/Atp2b2/Clstn1/Prkce/Ptprd/Cyth1/Fam107a/Ppp1r9b/Tbc1d24/Eif4e/Mtmr2/App/Efnb3/Mapt/Dvl1/Tubb2b/Cacna1e/Pclo/Ppp3ca/Ppp3r1/Prkcb/Shisa9/Dbn1/Mapk1/Atp2a2/Slc12a5/Syp/Nlgn3/Prkar2a/Ric3/Egfr/Dgki/Nlgn2/Abat/Ptk2b/Srf/Ywhag/Snap91/Kras/Pink1/Nat8l/Rab11a/Slc1a3/Tmod2/Dlg4/Gucy1b1/Nlgn1/Se…	159
GO:0098916	anterograde trans-synaptic signaling	159/2289	230/4318	2.36478e-07	0.000115368	0.000106291	Ctnnd2/Slc24a2/Cntn2/Gabra4/Syt7/Hap1/Clstn3/Cplx2/Cacna1a/Dgkb/Sipa1l1/Syn2/Igsf9b/Nrxn1/Ntrk2/Agt/Shank3/Kalrn/Atp2b2/Clstn1/Prkce/Ptprd/Cyth1/Fam107a/Ppp1r9b/Tbc1d24/Eif4e/Mtmr2/App/Efnb3/Mapt/Dvl1/Tubb2b/Cacna1e/Pclo/Ppp3ca/Ppp3r1/Prkcb/Shisa9/Dbn1/Mapk1/Atp2a2/Slc12a5/Syp/Nlgn3/Prkar2a/Ric3/Egfr/Dgki/Nlgn2/Abat/Ptk2b/Srf/Ywhag/Snap91/Kras/Pink1/Nat8l/Rab11a/Slc1a3/Tmod2/Dlg4/Gucy1b1/Nlgn1/Se…	159
GO:0031175	neuron projection development	263/2289	414/4318	3.60451e-06	0.00153867	0.00141761	Apc/Ctnnd2/Gpm6a/Dock10/Lrp1/Enc1/Cntn2/Sptbn4/Prex2/Hap1/Thy1/Cacna1a/Flrt1/Bcl2/Lingo1/Sipa1l1/Cyfip2/Epha7/Nrxn1/Ntrk2/Clu/Agt/Nrcam/Shank3/Kalrn/Atp2b2/Clasp2/Mag/Plxnb3/Ptprd/Pip5k1c/Acsl6/Tenm2/Spire1/Foxp1/Ppp1r9b/Tbc1d24/Fbxo7/Adgrb3/Dlg5/Aatk/Arhgap44/Fgfr2/Myh10/Lrrc7/App/Efnb3/Farp1/Ngef/Mapt/Bhlhb9/Tnik/Dvl1/Stmn4/Tubb2b/Ugt8a/Vldlr/Ppp3ca/Ndrg4/Mrtfb/Rb1/Dbn1/Plxnc1/Slc12a5/Cers2/Lhx…	263
GO:0048667	cell morphogenesis involved in neuron differentiation	165/2289	247/4318	4.2017e-06	0.00159431	0.00146887	Apc/Ctnnd2/Dock10/Lrp1/Cntn2/Sptbn4/Prex2/Thy1/Cacna1a/Bcl2/Sipa1l1/Cyfip2/Epha7/Ntrk2/Nrcam/Shank3/Kalrn/Atp2b2/Clasp2/Mag/Plxnb3/Ptprd/Pip5k1c/Tenm2/Foxp1/Tbc1d24/Adgrb3/Aatk/Arhgap44/Fgfr2/Myh10/App/Efnb3/Farp1/Ngef/Mapt/Bhlhb9/Tnik/Dvl1/Tubb2b/Vldlr/Ppp3ca/Rb1/Dbn1/Plxnc1/Lhx2/Nlgn3/Fgfr3/Btbd3/Rbfox2/Srf/Plppr4/Robo1/Snap91/Epha5/Nedd4l/Rab11a/Slc1a3/Dlg4/Nlgn1/Akap5/Foxg1/Ntrk3/Golga4/Creb1…	165
GO:0006811	ion transport	240/2289	376/4318	6.02957e-06	0.0020591	0.00189709	Slc1a2/Pitpnm2/Slc24a2/Atp1a3/COX1/Sptbn4/Gabra4/Cacna2d1/Syt7/Kcnt1/CYTB/Slc6a17/Hap1/Thy1/Cacna1a/Sfxn1/Bcl2/ATP6/Atp1a2/Stim2/Trpm3/Nrxn1/Ntrk2/Agt/Shank3/Atp2b2/ND4/Prkce/Wnk2/Atp8a1/Kcnq2/Acsl6/Cbarp/Kcnh3/Atp2b4/Atp11a/Bin1/Slc24a3/Scn8a/Pitpnm1/Slc4a4/Adcyap1r1/Slc25a18/Xpr1/Asph/Ryr2/Atp1b2/Cacna1e/Gnas/Acsl5/Ppp3ca/Rgs7/Sfxn5/Itgav/Prkcb/Shisa9/Atp2a2/Slc12a5/Slc12a2/Alg10b/Nlgn3/Heph/At…	240
GO:0099177	regulation of trans-synaptic signaling	131/2289	192/4318	8.43627e-06	0.00261908	0.00241301	Ctnnd2/Slc24a2/Cntn2/Syt7/Hap1/Clstn3/Cplx2/Cacna1a/Dgkb/Sipa1l1/Igsf9b/Nrxn1/Ntrk2/Agt/Shank3/Kalrn/Atp2b2/Clstn1/Prkce/Ptprd/Cyth1/Fam107a/Ppp1r9b/Tbc1d24/Eif4e/Mtmr2/App/Efnb3/Mapt/Dvl1/Tubb2b/Ppp3ca/Ppp3r1/Prkcb/Shisa9/Dbn1/Mapk1/Atp2a2/Syp/Nlgn3/Prkar2a/Egfr/Dgki/Nlgn2/Abat/Ptk2b/Srf/Ywhag/Kras/Pink1/Nat8l/Rab11a/Slc1a3/Dlg4/Gucy1b1/Nlgn1/Sept5/Syn1/Cpeb3/Bcr/Rasgrf1/Slc6a1/Serpine2/Apba2/Kc…	131
GO:0098742	cell-cell adhesion via plasma-membrane adhesion molecules	42/2289	51/4318	1.05056e-05	0.00291235	0.00268321	Clstn3/Igsf9b/Nrxn1/Nrcam/Mag/Plxnb3/Clstn1/Adgrl1/Ptprd/Sparcl1/Pik3cb/Tenm2/Ptprt/Adgrl3/Robo1/Mbp/Nlgn1/Ptprs/Celsr2/Dab1/Ptprf/Pcdh1/Kirrel3/Pcdhgc3/Dscaml1/Cdh20/Nectin1/Pcdh10/Pcdhb14/Pecam1/Mcam/Lrrc4b/Mdga2/Il1rap/Acvr1/Cdh10/Map2k5/Atp2c1/Cdh2/Igsf11/Cd164/Wnk1	42
GO:0050804	modulation of chemical synaptic transmission	130/2289	191/4318	1.10865e-05	0.00291235	0.00268321	Ctnnd2/Slc24a2/Cntn2/Syt7/Hap1/Clstn3/Cplx2/Cacna1a/Dgkb/Sipa1l1/Igsf9b/Nrxn1/Ntrk2/Agt/Shank3/Kalrn/Atp2b2/Clstn1/Prkce/Ptprd/Cyth1/Fam107a/Ppp1r9b/Tbc1d24/Eif4e/Mtmr2/App/Efnb3/Mapt/Dvl1/Tubb2b/Ppp3ca/Ppp3r1/Prkcb/Shisa9/Dbn1/Mapk1/Atp2a2/Syp/Nlgn3/Prkar2a/Egfr/Dgki/Nlgn2/Abat/Ptk2b/Srf/Ywhag/Kras/Pink1/Nat8l/Rab11a/Slc1a3/Dlg4/Gucy1b1/Nlgn1/Sept5/Syn1/Cpeb3/Bcr/Rasgrf1/Slc6a1/Serpine2/Apba2/Kc…	130
GO:0048666	neuron development	275/2289	440/4318	1.44456e-05	0.00352369	0.00324645	Apc/Ctnnd2/Gpm6a/Dock10/Lrp1/Enc1/Cntn2/Sptbn4/Prex2/Hap1/Thy1/Cacna1a/Flrt1/Bcl2/Lingo1/Sipa1l1/Cyfip2/Epha7/Thrb/Nrxn1/Ntrk2/Clu/Agt/Nrcam/Shank3/Kalrn/Atp2b2/Clasp2/Mag/Plxnb3/Ptprd/Pip5k1c/Acsl6/Tenm2/Spire1/Foxp1/Ppp1r9b/Tbc1d24/Mtmr2/Fbxo7/Adgrb3/Dlg5/Aatk/Arhgap44/Fgfr2/Myh10/Lrrc7/App/Efnb3/Farp1/Ngef/Mapt/Bhlhb9/Tnik/Dvl1/Stmn4/Tubb2b/Ugt8a/Vldlr/Ppp3ca/Ndrg4/Mrtfb/Rb1/Dbn1/Plxnc1/Slc12a…	275
GO:0061564	axon development	124/2289	183/4318	2.47646e-05	0.00529731	0.00488053	Apc/Lrp1/Cntn2/Sptbn4/Thy1/Cacna1a/Bcl2/Sipa1l1/Cyfip2/Epha7/Ntrk2/Nrcam/Kalrn/Clasp2/Mag/Plxnb3/Pip5k1c/Tenm2/Foxp1/Aatk/Fgfr2/Myh10/App/Efnb3/Mapt/Dvl1/Tubb2b/Dbn1/Plxnc1/Cers2/Lhx2/Nlgn3/Fgfr3/Srf/Plppr4/Robo1/Snap91/Epha5/Rab11a/Foxg1/Ntrk3/Golga4/Creb1/Ptprs/Plp1/Pak1/Bmpr1b/Ncam1/Smo/Braf/Pitpna/Pafah1b1/Unc5b/Dab1/Ptprf/Arhgap35/Enah/Spg20/Tspan2/Cnp/Dock7/Raph1/Apbb2/Atp8a2/Sept7/Picalm/B…	124
GO:0048858	cell projection morphogenesis	179/2289	276/4318	2.6021e-05	0.00529731	0.00488053	Apc/Ctnnd2/Gpm6a/Dock10/Lrp1/Cntn2/Sptbn4/Prex2/Thy1/Cacna1a/Flrt1/Bcl2/Sipa1l1/Cyfip2/Epha7/Ntrk2/Clu/Nrcam/Shank3/Kalrn/Clasp2/Mag/Plxnb3/Ptprd/Pip5k1c/Tenm2/Foxp1/Tbc1d24/Adgrb3/Aatk/Arhgap44/Fgfr2/Myh10/App/Efnb3/Farp1/Ngef/Mapt/Bhlhb9/Tnik/Dvl1/Tubb2b/Ugt8a/Vldlr/Ppp3ca/Dbn1/Plxnc1/Lhx2/Nlgn3/Fgfr3/Btbd3/Rbfox2/Egfr/Sh3gl2/Srf/Plppr4/Robo1/Snap91/Epha5/Nedd4l/Rab11a/Dlg4/Nlgn1/Akap5/Foxg1/Nt…	179
GO:0000904	cell morphogenesis involved in differentiation	187/2289	290/4318	2.86609e-05	0.00529731	0.00488053	Apc/Dmtn/Ctnnd2/Dock10/Lrp1/Cntn2/Sptbn4/Prex2/Thy1/Cacna1a/Bcl2/Sipa1l1/Cyfip2/Epha7/Ntrk2/Nrcam/Shank3/Kalrn/Atp2b2/Clasp2/Mag/Plxnb3/Ptprd/Pip5k1c/Tenm2/Foxp1/Tbc1d24/Adgrb3/Aatk/Arhgap44/Fgfr2/Myh10/App/Efnb3/Farp1/Ngef/Mapt/Bhlhb9/Tnik/Dvl1/Tubb2b/Vldlr/Ppp3ca/Rb1/Itgav/Ttc3/Dbn1/Plxnc1/Lhx2/Nlgn3/Fgfr3/Btbd3/Prox1/Rbfox2/Srf/Plppr4/Robo1/Snap91/Epha5/Nedd4l/Rab11a/Slc1a3/Dlg4/Nlgn1/Akap5/Fo…	187
GO:0032990	cell part morphogenesis	184/2289	285/4318	2.99383e-05	0.00529731	0.00488053	Apc/Ctnnd2/Gpm6a/Dock10/Lrp1/Cntn2/Sptbn4/Prex2/Thy1/Cacna1a/Flrt1/Bcl2/Sipa1l1/Cyfip2/Epha7/Ntrk2/Clu/Nrcam/Shank3/Kalrn/Clasp2/Mag/Plxnb3/Ptprd/Pip5k1c/Tenm2/Foxp1/Tbc1d24/Adgrb3/Aatk/Arhgap44/Fgfr2/Myh10/App/Efnb3/Farp1/Ngef/Mapt/Bhlhb9/Tnik/Dvl1/Tubb2b/Ugt8a/Vldlr/Ppp3ca/Polg2/Dbn1/Plxnc1/Lhx2/Nlgn3/Fgfr3/Btbd3/Rbfox2/Egfr/Sh3gl2/Srf/Plppr4/Robo1/Snap91/Epha5/Nedd4l/Rab11a/Dlg4/Nlgn1/Akap5/Fo…	184
GO:0007409	axonogenesis	117/2289	172/4318	3.20814e-05	0.00529731	0.00488053	Apc/Lrp1/Cntn2/Sptbn4/Thy1/Cacna1a/Bcl2/Sipa1l1/Cyfip2/Epha7/Ntrk2/Nrcam/Kalrn/Clasp2/Mag/Plxnb3/Pip5k1c/Tenm2/Foxp1/Aatk/Fgfr2/Myh10/App/Efnb3/Mapt/Dvl1/Tubb2b/Dbn1/Plxnc1/Lhx2/Nlgn3/Fgfr3/Srf/Plppr4/Robo1/Snap91/Epha5/Rab11a/Foxg1/Ntrk3/Golga4/Creb1/Ptprs/Pak1/Bmpr1b/Ncam1/Smo/Braf/Pitpna/Pafah1b1/Unc5b/Dab1/Arhgap35/Enah/Spg20/Cnp/Dock7/Raph1/Apbb2/Atp8a2/Sept7/Picalm/Brsk2/Tnr/Cxcl12/Apoe/Nfi…	117
GO:0050808	synapse organization	120/2289	177/4318	3.22592e-05	0.00529731	0.00488053	Ctnnd2/Gpm6a/Dock10/Cntn2/Ndrg2/Clstn3/Cacna1a/Flrt1/Dgkb/Sipa1l1/Epha7/Igsf9b/Nrxn1/Ntrk2/Nrcam/Shank3/Kalrn/Atp2b2/Clstn1/Adgrl1/Ptprd/Sparcl1/Utrn/Mtmr2/Adgrb3/Dlg5/Arhgap44/Fgfr2/Myh10/App/Farp1/Ngef/Mapt/Bhlhb9/Dvl1/Pclo/Camkv/Dbn1/Nlgn3/Adgrl3/Nlgn2/Arhgef9/Snap91/Epha5/Pcdhgc5/Ube2v2/Dlg4/Nlgn1/Syn1/Ntrk3/Ywhaz/Ptprs/Egln1/Pak1/Myo5a/Lzts3/Dgkz/Dnm1l/Rock2/Cacnb1/Adgrb2/Pafah1b1/Sez6l/Home…	120
GO:0120039	plasma membrane bounded cell projection morphogenesis	178/2289	275/4318	3.2575e-05	0.00529731	0.00488053	Apc/Ctnnd2/Gpm6a/Dock10/Lrp1/Cntn2/Sptbn4/Prex2/Thy1/Cacna1a/Flrt1/Bcl2/Sipa1l1/Cyfip2/Epha7/Ntrk2/Clu/Nrcam/Shank3/Kalrn/Clasp2/Mag/Plxnb3/Ptprd/Pip5k1c/Tenm2/Foxp1/Tbc1d24/Adgrb3/Aatk/Arhgap44/Fgfr2/Myh10/App/Efnb3/Farp1/Ngef/Mapt/Bhlhb9/Tnik/Dvl1/Tubb2b/Ugt8a/Vldlr/Ppp3ca/Dbn1/Plxnc1/Lhx2/Nlgn3/Fgfr3/Btbd3/Rbfox2/Egfr/Sh3gl2/Srf/Plppr4/Robo1/Snap91/Epha5/Nedd4l/Rab11a/Dlg4/Nlgn1/Akap5/Foxg1/Nt…	178
GO:0048812	neuron projection morphogenesis	174/2289	269/4318	4.24384e-05	0.00658759	0.0060693	Apc/Ctnnd2/Gpm6a/Dock10/Lrp1/Cntn2/Sptbn4/Prex2/Thy1/Cacna1a/Flrt1/Bcl2/Sipa1l1/Cyfip2/Epha7/Ntrk2/Clu/Nrcam/Shank3/Kalrn/Clasp2/Mag/Plxnb3/Ptprd/Pip5k1c/Tenm2/Foxp1/Tbc1d24/Adgrb3/Aatk/Arhgap44/Fgfr2/Myh10/App/Efnb3/Farp1/Ngef/Mapt/Bhlhb9/Tnik/Dvl1/Tubb2b/Ugt8a/Vldlr/Ppp3ca/Dbn1/Plxnc1/Lhx2/Nlgn3/Fgfr3/Btbd3/Rbfox2/Egfr/Sh3gl2/Srf/Plppr4/Robo1/Snap91/Epha5/Nedd4l/Rab11a/Dlg4/Nlgn1/Akap5/Foxg1/Nt…	174
GO:0043269	regulation of ion transport	123/2289	183/4318	4.77763e-05	0.00709375	0.00653563	Sptbn4/Cacna2d1/Syt7/Hap1/Thy1/Cacna1a/Bcl2/Atp1a2/Stim2/Nrxn1/Agt/Shank3/Atp2b2/Prkce/Wnk2/Atp8a1/Kcnq2/Acsl6/Cbarp/Kcnh3/Atp2b4/Bin1/Scn8a/Adcyap1r1/Asph/Ryr2/Atp1b2/Cacna1e/Gnas/Acsl5/Rgs7/Prkcb/Shisa9/Nlgn3/Atp2b1/Prkg2/Hk1/Nlgn2/Abat/Ptk2b/Pink1/Nat8l/Nedd4l/Dlg4/Nlgn1/Akap5/Scn2a/Rasgrf1/Slc6a1/Serpine2/Kcnc4/Ahcyl1/Myo5a/Cacnb1/Clic4/Syt11/Homer1/Ywhaq/Chrna4/Wwp2/Rasgrf2/Stk39/Slc8a1/Ffar…	123
GO:0051963	regulation of synapse assembly	34/2289	41/4318	5.7505e-05	0.00818249	0.00753871	Clstn3/Flrt1/Sipa1l1/Epha7/Nrxn1/Ntrk2/Clstn1/Adgrl1/Ptprd/Adgrb3/Dlg5/App/Farp1/Bhlhb9/Nlgn3/Adgrl3/Nlgn2/Arhgef9/Ube2v2/Nlgn1/Ntrk3/Ptprs/Adgrb2/Adgrl2/Nectin1/Lrrc4b/Mdga2/Il1rap/Lrrn1/Agrn/Adgrb1/Ppp1r9a/Dkk1/Arf6	34
GO:0032989	cellular component morphogenesis	258/2289	416/4318	6.11692e-05	0.00835571	0.0076983	Apc/Dmtn/Ctnnd2/Gpm6a/Dock10/Lrp1/Phldb1/Cntn2/Sptbn4/Prex2/Thy1/Cacna1a/Flrt1/Bcl2/Sipa1l1/Cyfip2/Epha7/Ntrk2/Clu/Nrcam/Shank3/Kalrn/Atp2b2/Clasp2/Mag/Plxnb3/Ptprd/Pip5k1c/Tenm2/Foxp1/Tbc1d24/Mtmr2/Adgrb3/Aatk/Arhgap44/Fgfr2/Myh10/App/Efnb3/Map7/Farp1/Ngef/Mapt/Bhlhb9/Tnik/Dvl1/Tubb2b/Ugt8a/Myl12b/Vldlr/Ppp3ca/Polg2/Rb1/Itgav/Ttc3/Dbn1/Plxnc1/Lhx2/Nlgn3/Fgfr3/Gna13/Btbd3/Prox1/Rbfox2/Rhobtb2/Egf…	258
GO:1901700	response to oxygen-containing compound	243/2289	391/4318	8.37767e-05	0.0105781	0.00974583	Slc1a2/Apc/Dmtn/Lrp1/Atp1a3/Rragd/Brinp1/Cacna2d1/CYTB/ND1/Cacna1a/Nnat/Bcl2/Atp1a2/Gpr37/Nrxn1/Ntrk2/Clu/Agt/Kalrn/Prkce/Ildr2/Atp2b4/Foxp1/Gatm/Eif4e/Scd2/Fbxo7/App/Map7/Asph/Ryr2/Cacna1e/Gnas/Irf1/Aqp4/Mbd5/Ppp3ca/Itgav/Prkcb/Lrp11/Rpl13a/Uso1/Mapk1/Atp2a2/Rorb/Rangap1/Tead1/Eny2/Pkm/Adgrl3/Ctr9/Atp2b1/Sesn3/Arrb1/Egfr/Abat/Prkaa1/Ptk2b/Ywhag/Nfe2l1/Ncoa1/Pink1/Pld1/Epha5/Slc1a3/Casp9/Dlg4/Igf…	243
GO:0000902	cell morphogenesis	240/2289	386/4318	8.9148e-05	0.0105781	0.00974583	Apc/Dmtn/Ctnnd2/Gpm6a/Dock10/Lrp1/Cntn2/Sptbn4/Prex2/Thy1/Cacna1a/Flrt1/Bcl2/Sipa1l1/Cyfip2/Epha7/Ntrk2/Clu/Nrcam/Shank3/Kalrn/Atp2b2/Clasp2/Mag/Plxnb3/Ptprd/Pip5k1c/Tenm2/Foxp1/Tbc1d24/Adgrb3/Aatk/Arhgap44/Fgfr2/Myh10/App/Efnb3/Map7/Farp1/Ngef/Mapt/Bhlhb9/Tnik/Dvl1/Tubb2b/Ugt8a/Myl12b/Vldlr/Ppp3ca/Rb1/Itgav/Ttc3/Dbn1/Plxnc1/Lhx2/Nlgn3/Fgfr3/Gna13/Btbd3/Prox1/Rbfox2/Rhobtb2/Egfr/Sh3gl2/Ptk2b/Srf/…	240
GO:0007267	cell-cell signaling	265/2289	430/4318	9.17903e-05	0.0105781	0.00974583	Apc/Ctnnd2/Slc24a2/Lrp1/Cntn2/Gabra4/Cacna2d1/Syt7/Ndrg2/Hap1/Clstn3/Cplx2/Thy1/Cacna1a/Nnat/Dgkb/Sipa1l1/Syn2/Igsf9b/Nrxn1/Ntrk2/Agt/Shank3/Kalrn/Atp2b2/Cpe/Clstn1/Prkce/Wnk2/Ptprd/Cyth1/Tenm2/Ildr2/Fam107a/Ppp1r9b/Tbc1d24/Eif4e/Mtmr2/Fgfr2/Plpp3/App/Efnb3/Farp1/Mapt/Tnik/Ryr2/Dvl1/Tubb2b/Cacna1e/Gnas/Mcc/Pclo/Ppp3ca/Pfkm/Ppp3r1/Prkcb/Shisa9/Dbn1/Mapk1/Atp2a2/Slc12a5/Glud1/Syp/Nlgn3/Prkar2a/Eny2…	265
GO:0007272	ensheathment of neurons	54/2289	72/4318	9.29261e-05	0.0105781	0.00974583	Cntn2/Myrf/Ntrk2/Clu/Mag/Mtmr2/Ugt8a/Id4/Ppp3r1/Fgfr3/Nab1/Bcas1/Mbp/Ntrk3/Plp1/Pllp/Myo5a/Itgb4/Cldn11/Mal/Cd9/Epb41l3/Psap/Tsc1/Tspan2/Sox10/Gal3st1/Ncstn/Tcf7l2/Fa2h/Qk/B4galt6/Nf1/Arhgef10/Ctnnb1/Pou3f1/Serinc5/Gjc3/Nfasc/Gpc1/Ski/Dlg1/Sirt2/Kif14/Jam3/Nkx6-2/Cdh2/Wasf3/Mpp5/Zscan26/Abcd2/Akt1/Kcnj10/Zfp24	54
GO:0008366	axon ensheathment	54/2289	72/4318	9.29261e-05	0.0105781	0.00974583	Cntn2/Myrf/Ntrk2/Clu/Mag/Mtmr2/Ugt8a/Id4/Ppp3r1/Fgfr3/Nab1/Bcas1/Mbp/Ntrk3/Plp1/Pllp/Myo5a/Itgb4/Cldn11/Mal/Cd9/Epb41l3/Psap/Tsc1/Tspan2/Sox10/Gal3st1/Ncstn/Tcf7l2/Fa2h/Qk/B4galt6/Nf1/Arhgef10/Ctnnb1/Pou3f1/Serinc5/Gjc3/Nfasc/Gpc1/Ski/Dlg1/Sirt2/Kif14/Jam3/Nkx6-2/Cdh2/Wasf3/Mpp5/Zscan26/Abcd2/Akt1/Kcnj10/Zfp24	54
GO:0006812	cation transport	175/2289	274/4318	0.000114351	0.0125971	0.011606	Slc24a2/Atp1a3/COX1/Sptbn4/Cacna2d1/Syt7/Kcnt1/CYTB/Slc6a17/Hap1/Thy1/Cacna1a/Sfxn1/Bcl2/ATP6/Atp1a2/Stim2/Trpm3/Nrxn1/Agt/Shank3/Atp2b2/ND4/Prkce/Wnk2/Kcnq2/Cbarp/Kcnh3/Atp2b4/Bin1/Slc24a3/Scn8a/Slc4a4/Adcyap1r1/Asph/Ryr2/Atp1b2/Cacna1e/Gnas/Ppp3ca/Rgs7/Itgav/Prkcb/Shisa9/Atp2a2/Slc12a5/Slc12a2/Alg10b/Nlgn3/Heph/Atp5b/Fam155a/Atp2b1/Fth1/Nlgn2/Abat/Ptk2b/Nfe2l1/Pink1/Nipa2/Nat8l/Nedd4l/Slc1a3/Dl…	175
GO:0042552	myelination	53/2289	71/4318	0.00013366	0.014264	0.0131418	Cntn2/Myrf/Ntrk2/Clu/Mag/Mtmr2/Ugt8a/Id4/Ppp3r1/Fgfr3/Nab1/Bcas1/Mbp/Ntrk3/Plp1/Pllp/Myo5a/Itgb4/Mal/Cd9/Epb41l3/Psap/Tsc1/Tspan2/Sox10/Gal3st1/Ncstn/Tcf7l2/Fa2h/Qk/B4galt6/Nf1/Arhgef10/Ctnnb1/Pou3f1/Serinc5/Gjc3/Nfasc/Gpc1/Ski/Dlg1/Sirt2/Kif14/Jam3/Nkx6-2/Cdh2/Wasf3/Mpp5/Zscan26/Abcd2/Akt1/Kcnj10/Zfp24	53
GO:0099174	regulation of presynapse organization	17/2289	18/4318	0.0001808	0.0187101	0.017238	Clstn3/Nrxn1/App/Farp1/Nlgn3/Nlgn2/Snap91/Nlgn1/Ntrk3/Ptprs/Picalm/Lrrc4b/Mdga2/Vps35/Il1rap/Dkk1/Arf6	17
GO:0051960	regulation of nervous system development	235/2289	381/4318	0.000220357	0.0215199	0.0198267	Lrp1/Enc1/Cntn2/Brinp1/Hap1/Clstn3/Thy1/Cacna1a/Flrt1/Bcl2/Lingo1/Sipa1l1/Epha7/Thrb/Myrf/Nrxn1/Ntrk2/Agt/Nrcam/Shank3/Kalrn/Cpe/Clasp2/Mag/Plxnb3/Clstn1/Adgrl1/Ptprd/Acsl6/Tbc1d24/Eif4e/Mtmr2/Aspa/Fbxo7/Adgrb3/Dlg5/Aatk/Bin1/Arhgap44/Lrrc7/App/Efnb3/Xrcc4/Farp1/Ngef/Mapt/Bhlhb9/Tnik/Dvl1/Tubb2b/Vldlr/Id4/Ppp3ca/Ndrg4/Ttc3/Dbn1/Plxnc1/Cers2/Lhx2/Nlgn3/Fgfr3/Nap1l1/Ptprg/Adgrl3/Prox1/Ppp2r5d/Negr1…	235
GO:0007416	synapse assembly	48/2289	64/4318	0.000228517	0.0215199	0.0198267	Gpm6a/Clstn3/Cacna1a/Flrt1/Sipa1l1/Epha7/Nrxn1/Ntrk2/Shank3/Clstn1/Adgrl1/Ptprd/Adgrb3/Dlg5/App/Farp1/Mapt/Bhlhb9/Dvl1/Pclo/Nlgn3/Adgrl3/Nlgn2/Arhgef9/Ube2v2/Nlgn1/Ntrk3/Ptprs/Adgrb2/Myo6/Kirrel3/Adgrl2/Nectin1/Fbxo45/Cdk5/Lrrc4b/Mdga2/Vps35/Il1rap/Plxnb1/Lrrn1/Cdh2/Dnm3/Agrn/Adgrb1/Ppp1r9a/Dkk1/Arf6	48
GO:0007156	homophilic cell adhesion via plasma membrane adhesion molecules	22/2289	25/4318	0.000231111	0.0215199	0.0198267	Clstn3/Igsf9b/Nrcam/Plxnb3/Clstn1/Pik3cb/Ptprt/Robo1/Celsr2/Ptprf/Pcdh1/Kirrel3/Pcdhgc3/Dscaml1/Cdh20/Nectin1/Pcdh10/Pcdhb14/Pecam1/Cdh10/Cdh2/Igsf11	22
GO:0007610	behavior	148/2289	230/4318	0.000233158	0.0215199	0.0198267	Slc1a2/Ctnnd2/Slc24a2/Atp1a3/Cntn2/Sptbn4/Brinp1/Prex2/Cacna1a/Bcl2/Atp1a2/Gpr37/Thrb/Lsamp/Nrxn1/Ntrk2/Agt/Shank3/Kalrn/Atp2b2/Prkce/Atp8a1/Spire1/Foxp1/Gatm/Eif4e/Adgrb3/Scn8a/App/Mta1/Efnb3/Astn1/Meis2/Mapt/Bhlhb9/Strbp/Dvl1/Cacna1e/Cyp7b1/Mbd5/Ndrg4/Sobp/Dbn1/Ccnd2/Slc12a5/Nlgn3/Adgrl3/Egfr/Dgki/Phf21a/Negr1/Nlgn2/Abat/Prkaa1/Srf/Ncoa1/Kras/Npas2/Slc1a3/Tmod2/Dlg4/Zdhhc8/Nlgn1/Sept5/Cpeb3/Scn…	148
GO:0001676	long-chain fatty acid metabolic process	13/2289	13/4318	0.00025689	0.0230863	0.0212699	Acsl6/Acsl5/Acsbg1/Plp1/Myo5a/Aig1/Qk/Elovl6/Mgll/Acsl1/Pnpla8/Fads1/Acot7	13
GO:0006935	chemotaxis	88/2289	129/4318	0.000263879	0.0231063	0.0212884	Lrp1/Cntn2/Cyfip2/Epha7/Cxcl14/Nrcam/Plxnb3/Pip5k1c/Tenm2/Foxp1/Myh10/App/Efnb3/Dvl1/Tubb2b/Ccl27a/Cyp7b1/Elmo2/Itgav/Rpl13a/Plxnc1/Lhx2/Slc12a2/Ptk2b/Robo1/Epha5/Foxg1/Ntrk3/Creb1/Gab1/Pla2g7/Bmpr1b/Ncam1/Smo/Maco1/Unc5b/Arhgap35/Enah/Stk39/Prkcq/Apbb2/Pde4b/Cxcl12/Nfib/Dscaml1/Nectin1/Cdk5/Myo9b/Rhog/Zswim8/Smad3/Cmtm5/Bcar1/Scrib/Abcc1/Unc5c/Mapk8ip3/Prex1/Nfasc/Adam17/Plxnb1/Lgr4/Fzd3/Adam10/…	88
GO:0007266	Rho protein signal transduction	51/2289	69/4318	0.000272788	0.0232893	0.0214569	Prex2/Kalrn/Farp1/Ngef/Gna13/Arrb1/Mcf2l/Rhobtb2/Arhgef9/Robo1/Dlc1/Bcr/Rasgrf1/Arhgef2/Rock2/Plekhg3/Abr/Fgd6/Itsn1/Arhgap35/Rasgrf2/Akap13/Gpr17/Rhob/Arhgap32/Arhgef4/Rhot2/Gna12/Apoe/Als2/Myo9b/Rhog/Arhgef11/Heg1/Hacd3/Arhgef10/Pecam1/Prex1/Kank1/Flcn/Cdc42se2/Itsn2/Cdh2/Rhot1/Rhoa/Kctd13/Arhgap42/Ctnnal1/Itgb1/Abl1/Srgap1	51
GO:0042330	taxis	89/2289	131/4318	0.000303656	0.0249019	0.0229427	Lrp1/Cntn2/Cyfip2/Epha7/Cxcl14/Nrcam/Plxnb3/Pip5k1c/Tenm2/Foxp1/Myh10/App/Efnb3/Dvl1/Tubb2b/Ccl27a/Cyp7b1/Elmo2/Itgav/Rpl13a/Plxnc1/Lhx2/Slc12a2/Nlgn2/Ptk2b/Robo1/Epha5/Foxg1/Ntrk3/Creb1/Gab1/Pla2g7/Bmpr1b/Ncam1/Smo/Maco1/Unc5b/Arhgap35/Enah/Stk39/Prkcq/Apbb2/Pde4b/Cxcl12/Nfib/Dscaml1/Nectin1/Cdk5/Myo9b/Rhog/Zswim8/Smad3/Cmtm5/Bcar1/Scrib/Abcc1/Unc5c/Mapk8ip3/Prex1/Nfasc/Adam17/Plxnb1/Lgr4/Fzd3/A…	89
GO:0046578	regulation of Ras protein signal transduction	64/2289	90/4318	0.000306261	0.0249019	0.0229427	Prex2/Ralgps2/Kalrn/Cyth1/Arhgap44/Fbxo8/Farp1/Ngef/Arrb1/Mcf2l/Dgki/Arhgef9/Rasa2/Robo1/Kras/Psd2/Dlc1/Bcr/Rasgrf1/Mmd2/Arhgef2/Dgkz/Dennd4b/Plekhg3/Abr/Fgd6/Itsn1/Arhgap35/Rasgrf2/Akap13/Gpr17/Arhgef4/Arfgef3/Mfn2/Apoe/Arfgef1/Rtn4/Mapre2/Arfgap1/Als2/Myo9b/Heg1/Nf1/Arhgef10/Psd3/Stambp/Prex1/Kank1/Flcn/Cdc42se2/Kif14/Itsn2/Hras/Cadm4/Rasal1/Notch2/Cdh2/Kctd13/Arhgap42/Shoc2/Rapgef1/Itgb1/Abl1/…	64
GO:0010001	glial cell differentiation	73/2289	105/4318	0.000361846	0.0287373	0.0264763	Lrp1/Cntn2/Lingo1/Myrf/Ntrk2/Clu/Agt/Mag/Aspa/Bin1/Plpp3/App/Id4/Ppp3r1/Mapk1/Nlgn3/Fgfr3/Nab1/Egfr/Nfe2l1/Kras/Ntrk3/Serpine2/Plp1/Itgb4/Smo/Olig1/Dner/Dusp15/Dab1/Gfap/Erbb3/Tspan2/Bag1/Sox10/Cnp/Ncstn/Sox8/Tcf7l2/Nfib/Rtn4/Cdk5/Med12/Fa2h/Qk/B4galt6/Nf1/Arhgef10/Ctnnb1/Daam2/Pou3f1/Lrp6/Kdm4a/Ptpra/Phgdh/Sox4/Ptpn11/Il6st/Gpc1/Ski/Sirt2/Nkx2-2/Nkx6-2/Cdh2/Mettl14/Rheb/Rhoa/Wasf3/Mpp5/Akt1/Kcnj…	73
GO:0051056	regulation of small GTPase mediated signal transduction	71/2289	102/4318	0.000410769	0.0318813	0.0293729	Prex2/Ralgps2/Sipa1l1/Kalrn/Cyth1/Arhgap44/Adcyap1r1/Fbxo8/Farp1/Ngef/Ralgapa2/Arrb1/Mcf2l/Dgki/Arhgef9/Rasa2/Robo1/Kras/Psd2/Dlc1/Bcr/Rasgrf1/Mmd2/Arhgef2/Dgkz/Dennd4b/Plekhg3/Abr/Fgd6/Itsn1/Arhgap35/Rasgrf2/Akap13/Gpr17/Arhgef4/Arfgef3/Mfn2/Apoe/Arfgef1/Rtn4/Mapre2/Arfgap1/Als2/Myo9b/Heg1/Nf1/Ralgapb/Arhgef10/Psd3/Stambp/Garnl3/Prex1/Kank1/Flcn/Cdc42se2/Arhgap12/Rap1gap/Kif14/Itsn2/Hras/Cadm4/R…	71
GO:0007264	small GTPase mediated signal transduction	127/2289	196/4318	0.000423093	0.032108	0.0295819	Dock10/Prex2/Ralgps2/Sipa1l1/Kalrn/Cyth1/Rab3c/Aatk/Arhgap44/Adcyap1r1/Fbxo8/Farp1/Ngef/Ralgapa2/Uso1/Gna13/Arrb1/Mcf2l/Rab6b/Rhobtb2/Dgki/Arhgef9/Rasa2/Robo1/Kras/Rab36/Dock3/Rab11a/Psd2/Dlc1/Mras/Bcr/Rasgrf1/Rgl1/Mmd2/Arhgef2/Rab6a/Dgkz/Rock2/Dennd4b/Kndc1/Plekhg3/Abr/Ywhaq/Dab1/Ift27/Ralgds/Fgd6/Itsn1/Arhgap35/Rasgrf2/Akap13/Dnajc27/Rap1a/Dock7/Gpr17/Rhob/Arhgap32/Dock1/Arhgef4/Rhot2/Gna12/Arf…	127
GO:0051965	positive regulation of synapse assembly	23/2289	27/4318	0.000459883	0.0341413	0.0314552	Clstn3/Flrt1/Nrxn1/Ntrk2/Clstn1/Adgrl1/Ptprd/Adgrb3/Dlg5/Bhlhb9/Nlgn3/Adgrl3/Nlgn2/Ube2v2/Nlgn1/Ntrk3/Adgrb2/Adgrl2/Lrrc4b/Il1rap/Lrrn1/Agrn/Adgrb1	23
GO:0010035	response to inorganic substance	93/2289	139/4318	0.000510527	0.0370947	0.0341762	Dmtn/Ddi2/Syt7/CYTB/Bcl2/Gpr37/Nrxn1/Atp2b4/Foxp1/Gatm/Fbxo7/Asph/Mapt/Ryr2/Ppp3ca/Itgav/Lrp11/Mapk1/Glud1/Egfr/Abat/Prkaa1/Ptk2b/Nfe2l1/Pink1/Nedd4l/Slc1a3/Dlg4/Nlgn1/Creb1/Mt1/Egln1/Ahcyl1/Npc1/Ncam1/Clic4/Entpd6/Braf/Pde8a/Syt11/Homer1/Psap/Mien1/Fus/Rhob/Ncstn/Prdx2/Mapk9/Pld2/Cryab/Ppp1r15b/Gsn/Blm/Fosb/Hsph1/Smpd3/Hnrnpd/Cat/Kcna1/Bcar1/Setx/Szt2/Stim1/Prdx1/Vcp/Selenop/Dlg2/Parp1/Ppp2ca/Ac…	93
GO:0072330	monocarboxylic acid biosynthetic process	59/2289	83/4318	0.000532473	0.0378832	0.0349027	Srr/Aldoc/Agt/Scd2/App/Pfkp/Cyp7b1/Pfkm/Acsbg1/Ldhb/Pkm/Prox1/Acsl3/Hk1/Abat/Prkaa1/Slc1a3/Fads2/Plp1/Myo5a/Ptgds/Bpgm/Pgk1/Scd1/Mpi/Lpgat1/Ddit4/Mapk9/Gapdh/Pibf1/Foxk1/Insig1/Fa2h/Qk/Pgam1/Hacd3/Elovl6/Degs1/Mgll/Ldha/Zbtb7a/Ptges3/Gpd1/Fabp5/Acaca/Jmjd8/Pnpla8/Prkag1/Elovl1/Fads1/Cbr4/Abcd2/Acly/Abhd3/Fasn/Zbtb20/Gpi1/Acot7/Sirt6	59
GO:0055085	transmembrane transport	190/2289	306/4318	0.000557341	0.0388433	0.0357872	Slc1a2/Slc24a2/Atp1a3/COX1/Gabra4/Cacna2d1/CYTB/Hap1/Thy1/Cacna1a/Sfxn1/Bcl2/ATP6/Atp1a2/Stim2/Nrxn1/Agt/Shank3/Atp2b2/ND4/Prkce/Wnk2/Kcnq2/Acsl6/Cbarp/Kcnh3/Atp2b4/Bin1/Slc24a3/Scn8a/Slc25a18/Xpr1/Asph/Ryr2/Mfsd1/Atp1b2/Cacna1e/Pex6/Acsl5/Rgs7/Sfxn5/Itgav/Prkcb/Shisa9/Atp2a2/Slc12a5/Slc12a2/Oaz2/Alg10b/Nlgn3/Atp5b/Fam155a/Atp2b1/Hk1/Nlgn2/Ptk2b/Pink1/Nedd4l/Slc1a3/Dlg4/Nlgn1/Bcr/Scn2a/Rasgrf1/Sl…	190
GO:0030001	metal ion transport	134/2289	209/4318	0.000577124	0.0394176	0.0363163	Slc24a2/Atp1a3/Sptbn4/Cacna2d1/Kcnt1/Hap1/Thy1/Cacna1a/Sfxn1/Bcl2/Atp1a2/Stim2/Agt/Atp2b2/Prkce/Wnk2/Kcnq2/Cbarp/Kcnh3/Atp2b4/Bin1/Slc24a3/Scn8a/Slc4a4/Adcyap1r1/Asph/Ryr2/Atp1b2/Cacna1e/Gnas/Ppp3ca/Rgs7/Itgav/Prkcb/Atp2a2/Slc12a5/Slc12a2/Alg10b/Heph/Fam155a/Atp2b1/Fth1/Ptk2b/Nipa2/Nedd4l/Slc1a3/Akap5/Scn2a/Slc39a14/Serpine2/Kcnc4/Ahcyl1/Orai2/Myo5a/Magt1/Dnm1l/Cacnb1/Homer1/Chrna4/Wwp2/Ryr3/Mage…	134
GO:0097485	neuron projection guidance	50/2289	69/4318	0.000687426	0.0452191	0.0416614	Lrp1/Cntn2/Cyfip2/Epha7/Nrcam/Plxnb3/Tenm2/Foxp1/Myh10/App/Efnb3/Dvl1/Tubb2b/Plxnc1/Lhx2/Robo1/Epha5/Foxg1/Bmpr1b/Ncam1/Smo/Unc5b/Arhgap35/Enah/Apbb2/Cxcl12/Nfib/Dscaml1/Nectin1/Cdk5/Zswim8/Unc5c/Mapk8ip3/Nfasc/Plxnb1/Lgr4/Fzd3/Sema7a/Sema3e/Nr4a3/Sema6d/Apbb1/Zswim6/Dpysl4/Ryk/Agrn/Kif3a/Sema5a/Bmpr2/Etv1	50
GO:0022603	regulation of anatomical structure morphogenesis	210/2289	342/4318	0.000688549	0.0452191	0.0416614	Apc/Dmtn/Lrp1/Phldb1/Cntn2/Thy1/Cacna1a/Bcl2/Sipa1l1/Epha7/Thrb/Ntrk2/Agt/Shank3/Kalrn/Cpe/Clasp2/Mag/Plxnb3/Ptprd/Tbc1d24/Adgrb3/Aatk/Arhgap44/Fgfr2/Myh10/Efnb3/Ngef/Mapt/Bhlhb9/Tnik/Dvl1/Tubb2b/Myl12b/Ppp3ca/Prkcb/Ttc3/Dbn1/Plxnc1/Nlgn3/Nfatc2/Pkm/Gna13/Prox1/Ptk2b/Srf/Robo1/Ddah1/Snap91/Pink1/Nedd4l/Rab11a/Mbp/Dlg4/Camsap1/Nlgn1/Akap5/Ntrk3/Dlc1/Bcr/Inf2/Golga4/Ptprs/Gng5/Cux1/Egln1/Pak1/Gab1/…	210
GO:0035023	regulation of Rho protein signal transduction	36/2289	47/4318	0.000710952	0.0458094	0.0422053	Prex2/Kalrn/Farp1/Ngef/Arrb1/Mcf2l/Arhgef9/Robo1/Dlc1/Bcr/Rasgrf1/Arhgef2/Plekhg3/Abr/Fgd6/Itsn1/Arhgap35/Rasgrf2/Akap13/Gpr17/Arhgef4/Apoe/Als2/Myo9b/Heg1/Arhgef10/Prex1/Kank1/Flcn/Cdc42se2/Itsn2/Cdh2/Kctd13/Arhgap42/Itgb1/Abl1	36
GO:0006820	anion transport	81/2289	120/4318	0.000768175	0.0485799	0.0447578	Slc1a2/Pitpnm2/Gabra4/Slc6a17/Cacna1a/Sfxn1/Ntrk2/Agt/Atp8a1/Acsl6/Atp11a/Pitpnm1/Slc4a4/Slc25a18/Xpr1/Acsl5/Sfxn5/Slc12a5/Slc12a2/Prkg2/Ttyh3/Acsl3/Hk1/Abat/Nfe2l1/Slc1a3/Slc6a1/Ahcyl1/Pak1/Slc35b4/Clic4/Pitpna/Slc16a1/Stard7/Psap/Ttyh1/Slc38a2/Stk39/Vdac1/Slc13a3/Myo6/Atp8a2/Mapk9/Gopc/Apoe/Adora1/Slc12a6/Nr3c1/Slc23a2/Scarb2/Atp9b/Slc4a2/Nf1/Ano4/Slc6a9/Tmem30a/Abcc1/Slc43a2/Slc6a6/Gabbr1/Abcc…	81
GO:0006836	neurotransmitter transport	56/2289	79/4318	0.000821522	0.0510091	0.0469958	Slc1a2/Syt7/Slc6a17/Cplx2/Cacna1a/Atp1a2/Syn2/Nrxn1/Ntrk2/Prkce/Cyth1/Slc25a18/Dvl1/Pclo/Prkcb/Atp2a2/Syp/Slc6a11/Dgki/Abat/Snap91/Nat8l/Slc1a3/Nlgn1/Sept5/Cadps/Syn1/Slc6a1/Ywhaz/Apba2/Kcnc4/Pak1/Dnm1l/Braf/Syt11/Chrna4/Gfap/Pfn2/Slc44a1/Myo6/Rap1a/Bcl2l1/Erc1/Nf1/Snap47/Slc6a9/Scrib/Slc6a6/Gabbr1/Stxbp5/Sv2a/Rap1b/Rhot1/Fbxl20/Kcnj10/Ppp1r9a	56
GO:0043410	positive regulation of MAPK cascade	79/2289	117/4318	0.000876689	0.0534624	0.0492561	Lrp1/Wwc1/Gpr37/Nrxn1/Ntrk2/Agt/Prkce/Map3k9/Fgfr2/App/Tnik/Ndrg4/Fgfr3/Arrb1/Peli2/Egfr/Ptk2b/Robo1/Kras/Ntrk3/Pak1/Gab1/Mapk8ip1/Rock2/Braf/Pde8a/Dusp15/Psap/Lamtor3/Stk39/Akap13/Dnajc27/Dab2/Rap1a/Prdx2/Pja2/Igfbp4/Apoe/Sash1/Zeb2/Mink1/Adora1/Dstyk/Akap12/Ksr1/Rassf2/Dixdc1/Ctnnb1/Mapk8ip3/Cd81/Frs2/Ptpn11/Adam17/Rb1cc1/Sema7a/Hipk2/Taok2/Map2k5/Rap1b/Pdcd10/Hras/Notch2/Cdh2/Map3k7/Irak1/Nod1…	79
GO:0045664	regulation of neuron differentiation	178/2289	287/4318	0.000902621	0.0540781	0.0498234	Lrp1/Enc1/Cntn2/Brinp1/Hap1/Thy1/Cacna1a/Bcl2/Sipa1l1/Epha7/Thrb/Ntrk2/Agt/Nrcam/Shank3/Kalrn/Clasp2/Mag/Plxnb3/Ptprd/Acsl6/Tbc1d24/Eif4e/Fbxo7/Adgrb3/Dlg5/Aatk/Bin1/Arhgap44/Lrrc7/App/Efnb3/Ngef/Mapt/Bhlhb9/Tnik/Dvl1/Tubb2b/Vldlr/Id4/Ppp3ca/Ndrg4/Ttc3/Dbn1/Plxnc1/Cers2/Nlgn3/Ptprg/Prox1/Ppp2r5d/Negr1/Nlgn2/Ptk2b/Srf/Ywhag/Robo1/Ncoa1/Snap91/Nedd4l/Rab11a/Ube2v2/Dlg4/Nlgn1/Akap5/Foxg1/Cpeb3/Ntrk3…	178
GO:0007411	axon guidance	49/2289	68/4318	0.000957038	0.0562677	0.0518407	Lrp1/Cntn2/Cyfip2/Epha7/Nrcam/Plxnb3/Tenm2/Foxp1/Myh10/App/Efnb3/Dvl1/Tubb2b/Plxnc1/Lhx2/Robo1/Epha5/Foxg1/Bmpr1b/Ncam1/Smo/Unc5b/Arhgap35/Enah/Apbb2/Cxcl12/Nfib/Dscaml1/Nectin1/Cdk5/Zswim8/Unc5c/Mapk8ip3/Nfasc/Plxnb1/Lgr4/Fzd3/Sema7a/Sema3e/Nr4a3/Sema6d/Apbb1/Zswim6/Ryk/Agrn/Kif3a/Sema5a/Bmpr2/Etv1	49
GO:0001505	regulation of neurotransmitter levels	68/2289	99/4318	0.000972358	0.0562677	0.0518407	Slc1a2/Syt7/Cplx2/Cacna1a/Atp1a2/Syn2/Nrxn1/Ntrk2/Clu/Agt/Atp2b2/Prkce/Cyth1/Atp2b4/Dvl1/Pclo/Prkcb/Atp2a2/Syp/Slc6a11/Dgki/Abat/Ptk2b/Ddah1/Snap91/Nat8l/Slc1a3/Nlgn1/Sept5/Cadps/Syn1/Slc6a1/Apba2/Kcnc4/Pak1/Dnm1l/Rock2/Braf/Syt11/Chrna4/Gad2/Gfap/Pfn2/Myo6/Rap1a/Mapk9/Bcl2l1/Bche/Erc1/Smpd3/Nf1/Smad3/Wdr35/Aldh6a1/Snap47/Slc6a9/Scrib/Phgdh/Stxbp5/Sv2a/Rap1b/Hsp90aa1/Rhot1/Fbxl20/Akt1/Kcnj10/Ppp1…	68
GO:0060562	epithelial tube morphogenesis	71/2289	104/4318	0.000988598	0.0562677	0.0518407	Bcl2/Epha7/Agt/Shank3/Dlg5/Fgfr2/Ryr2/Dvl1/Ppp3r1/Lhx2/Slc12a2/Sdc4/Tead1/Gna13/Srf/Robo1/Kras/Arid1a/Dlc1/Ift122/Pak1/Smo/Rock2/Clic4/Pbx1/Arhgap35/Enah/Tsc1/Ncoa3/Rhob/Prkaca/Cxcl12/Sox8/Zeb2/Rala/Nr3c1/Lzts2/Med12/Hhip/Prkacb/Smad3/Ctnnb1/Scrib/Pkd1/Lrp6/Fmn1/Sox4/Rab23/Ski/Lgr4/Fzd3/Acvr1/Mib1/Hey1/Dlg1/Sema3e/Notch2/Ipmk/Map3k7/Ddr1/Rhoa/Prickle1/Nfatc3/Kat2a/Sec24b/Kif3a/Sema5a/Ppp1ca/Tmed2…	71
GO:0042493	response to drug	138/2289	218/4318	0.00105341	0.0589739	0.054334	Slc1a2/Atp1a3/Ddi2/Gabra4/Syt7/Slc6a17/Cacna1a/Sfxn1/Bcl2/Atp1a2/Gpr37/Gnal/Agt/Kalrn/Prkce/Atp2b4/Foxp1/Ppp1r9b/Eif4e/Fbxo7/Slc25a18/Asph/Ryr2/Gstm1/Gnas/Aqp4/Ppp3ca/Sfxn5/Itgav/Prkcb/Mapk1/Slc12a5/Nfatc2/Adgrl3/Abat/Prkaa1/Ptk2b/Ncoa1/Pink1/Npas2/Epha5/Nat8l/Slc1a3/Casp9/Dlg4/Castor2/Eef1b2/Ywhaz/Creb1/Egln1/Arhgef2/Npc1/Ncam1/Rock2/Emx2/Braf/Pde8a/Syt11/Homer1/Chrna4/Psap/Ppp1r12a/Gdf1/Crls1/C…	138
GO:0043484	regulation of RNA splicing	47/2289	65/4318	0.00107202	0.0590473	0.0544016	Celf5/Celf2/Rbfox2/Mbnl2/Rbm7/Clk4/Nsrp1/Rrp1b/Srsf5/Rbm5/Srsf6/Son/Ddx17/Srek1/Npm1/Mbnl3/Hspa8/Ddx5/Tmbim6/Clk3/Rnps1/Rbm15b/Srsf3/Zfp64/Cdk12/Hnrnpa2b1/Khdrbs1/Hnrnpl/Ptbp2/Prdx6/Hnrnpk/Pik3r1/Eif4a3/Setx/Rps13/Zbtb7a/Hnrnph1/Rbm4/Tra2b/Sfswap/Thrap3/Acin1/Rbm22/Dyrk1a/Hnrnpll/Rbm25/Ncbp1	47
GO:0016053	organic acid biosynthetic process	69/2289	101/4318	0.00112709	0.0601406	0.0554089	Srr/Aldoc/Agt/Atp2b4/Gatm/Scd2/App/Pfkp/Cyp7b1/Pfkm/Acsbg1/Ldhb/Glud1/Pkm/Prox1/Acsl3/Hk1/Abat/Prkaa1/Sephs1/Slc1a3/Fads2/Plp1/Myo5a/Ptgds/Bpgm/Pgk1/Scd1/Mpi/Cbs/Lpgat1/Ddit4/Mapk9/Gapdh/Pibf1/Foxk1/Psat1/Insig1/Fa2h/Qk/Pgam1/Hacd3/Smpd3/Elovl6/Degs1/Aasdhppt/Phgdh/Mgll/Ldha/Zbtb7a/Ptges3/Gpd1/Fabp5/Acaca/Jmjd8/Enoph1/Pnpla8/Prkag1/Elovl1/Fads1/Cbr4/Abcd2/Acly/Abhd3/Fasn/Zbtb20/Gpi1/Acot7/Sirt6	69
GO:0046394	carboxylic acid biosynthetic process	69/2289	101/4318	0.00112709	0.0601406	0.0554089	Srr/Aldoc/Agt/Atp2b4/Gatm/Scd2/App/Pfkp/Cyp7b1/Pfkm/Acsbg1/Ldhb/Glud1/Pkm/Prox1/Acsl3/Hk1/Abat/Prkaa1/Sephs1/Slc1a3/Fads2/Plp1/Myo5a/Ptgds/Bpgm/Pgk1/Scd1/Mpi/Cbs/Lpgat1/Ddit4/Mapk9/Gapdh/Pibf1/Foxk1/Psat1/Insig1/Fa2h/Qk/Pgam1/Hacd3/Smpd3/Elovl6/Degs1/Aasdhppt/Phgdh/Mgll/Ldha/Zbtb7a/Ptges3/Gpd1/Fabp5/Acaca/Jmjd8/Enoph1/Pnpla8/Prkag1/Elovl1/Fads1/Cbr4/Abcd2/Acly/Abhd3/Fasn/Zbtb20/Gpi1/Acot7/Sirt6	69
GO:0034762	regulation of transmembrane transport	104/2289	160/4318	0.00118087	0.062041	0.0571598	Slc1a2/Cacna2d1/Hap1/Thy1/Cacna1a/Bcl2/Atp1a2/Stim2/Nrxn1/Agt/Shank3/Prkce/Wnk2/Kcnq2/Acsl6/Cbarp/Kcnh3/Atp2b4/Bin1/Scn8a/Asph/Ryr2/Atp1b2/Cacna1e/Acsl5/Rgs7/Prkcb/Shisa9/Oaz2/Nlgn3/Hk1/Nlgn2/Ptk2b/Pink1/Nedd4l/Dlg4/Nlgn1/Scn2a/Rasgrf1/Kcnc4/Ahcyl1/Myo5a/Cacnb1/Clic4/Braf/Homer1/Ywhaq/Chrna4/Wwp2/C2cd5/Rasgrf2/Erbb3/Stk39/Slc8a1/Rap1a/Ywhah/Pde4b/Gopc/Pea15a/Hspa2/Atg5/Akap7/Akap6/Atp1b3/Mink1/St…	104
GO:0007265	Ras protein signal transduction	108/2289	167/4318	0.00124875	0.0646134	0.0595297	Prex2/Ralgps2/Kalrn/Cyth1/Rab3c/Aatk/Arhgap44/Fbxo8/Farp1/Ngef/Ralgapa2/Gna13/Arrb1/Mcf2l/Rab6b/Rhobtb2/Dgki/Arhgef9/Rasa2/Robo1/Kras/Rab36/Rab11a/Psd2/Dlc1/Mras/Bcr/Rasgrf1/Mmd2/Arhgef2/Rab6a/Dgkz/Rock2/Dennd4b/Plekhg3/Abr/Ift27/Fgd6/Itsn1/Arhgap35/Rasgrf2/Akap13/Dnajc27/Rap1a/Gpr17/Rhob/Arhgap32/Arhgef4/Rhot2/Gna12/Arfgef3/Mfn2/Apoe/Arfgef1/Rtn4/Rala/Mapre2/Arfgap1/Ksr1/Als2/Myo9b/Rhog/Arhgef11…	108
GO:0007626	locomotory behavior	65/2289	95/4318	0.00146503	0.0739073	0.0680924	Atp1a3/Cntn2/Sptbn4/Prex2/Cacna1a/Atp1a2/Gpr37/Lsamp/Shank3/Kalrn/Atp2b2/Prkce/Scn8a/App/Mta1/Efnb3/Astn1/Mapt/Cacna1e/Sobp/Dbn1/Ccnd2/Adgrl3/Negr1/Nlgn2/Abat/Npas2/Dlg4/Zdhhc8/Apba2/Myo5a/Npc1/Pex13/Tmod1/Uba6/Arrdc3/Pafah1b1/Aplp2/Sez6l/Chrna4/Gprc5b/Dab1/Psap/Tsc1/Vps13a/Cnp/Myo6/Gnao1/Tnr/Cxcl12/Apoe/Als2/Idua/Ncoa2/Vps35/Selenop/Cacna1c/Hipk2/Nav2/Glrb/Usp2/Oxr1/Spg11/Kcnj10/Rcan2	65
GO:0099601	regulation of neurotransmitter receptor activity	16/2289	18/4318	0.00147165	0.0739073	0.0680924	Nrxn1/Shank3/Shisa9/Nlgn3/Nlgn2/Ptk2b/Pink1/Dlg4/Nlgn1/Rasgrf1/Homer1/Chrna4/Rasgrf2/Mink1/Arc/Klhl24	16
GO:0046903	secretion	183/2289	298/4318	0.00151662	0.0744331	0.0685769	Dmtn/Lrp1/Syt7/Hap1/Cplx2/Cacna1a/Nnat/Syn2/Nrxn1/Ntrk2/Agt/Kalrn/Atp2b2/Cpe/Sept4/Clasp2/Prkce/Pip5k1c/Cyth1/Cbarp/Ildr2/Foxp1/Rab3c/Myh10/Dvl1/Cacna1e/Gnas/Pclo/Sec24a/Ppp3ca/Pfkm/Lgi3/Itgav/Prkcb/Atp2a2/Glud1/Syp/Sdc4/Eny2/Arrb1/Egfr/Dgki/Acsl3/Hk1/Nlgn2/Abat/Snap91/Pink1/Epha5/Rab11a/Mbp/Nlgn1/Akap5/Sept5/Cadps/Syn1/Bcr/Slc6a1/Serpine2/Ywhaz/Apba2/Kcnc4/Creb1/Pak1/Golph3/Myo5a/Pdcd6ip/Exoc6b/…	183
GO:0030198	extracellular matrix organization	34/2289	45/4318	0.00152572	0.0744331	0.0685769	Phldb1/Agt/Clasp2/App/Rb1/Spock2/Mmp17/Aplp2/Gfap/Aplp1/Nfkb2/Aebp1/Apbb2/Tnr/P4ha1/Ndnf/Ero1l/Sulf2/Smpd3/Nf1/Smad3/Adamtsl4/Vipas39/Idua/Mia3/Fscn1/Washc1/Lamc1/Ddr1/Apbb1/Sema5a/Itgb1/Abl1/Emilin1	34
GO:0009967	positive regulation of signal transduction	242/2289	403/4318	0.0016875	0.0783577	0.0721927	Dmtn/Lrp1/Cntn2/Rragd/Wwc1/Hap1/Timp3/Gpr37/Cyfip2/Igsf9b/Nrxn1/Ntrk2/Clu/Agt/Shank3/Sept4/Prkce/Wnk2/Map3k9/Tbc1d24/Phlpp1/Zfp423/Dlg5/Fgfr2/Adcyap1r1/App/Tnik/Dvl1/Gnas/Mbd5/Ndrg4/Prkcb/Dbn1/Nlgn3/Fgfr3/Rpl26/Arrb1/Macf1/Peli2/Mcf2l/Egfr/Dgki/Ppp2r5d/Nlgn2/Abat/Ptk2b/Robo1/Kras/Pink1/Tmod2/Dlg4/Igfbp5/Nlgn1/Akap5/Ntrk3/Rpl23/Rasgrf1/Mmd2/Gdf11/Pak1/Gab1/Golph3/Mapk8ip1/Bmpr1b/Ncam1/Smo/Mal/Dnm1…	242
[truncated: 3,344 more rows]

## Sheet: 6
ID	Description	GeneRatio	BgRatio	pvalue	p.adjust	qvalue	geneID	Count
[truncated: 542 more rows]

## Sheet: 7
ID	Description	GeneRatio	BgRatio	pvalue	p.adjust	qvalue	geneID	Count
[truncated: 499 more rows]

## Sheet: 8
ID	Description	GeneRatio	BgRatio	pvalue	p.adjust	qvalue	geneID	Count
[truncated: 3,413 more rows]

## Sheet: 9
ID	Description	GeneRatio	BgRatio	pvalue	p.adjust	qvalue	geneID	Count
[truncated: 539 more rows]

[truncated: 11 more sheets: 10, 11, 12, 13, 14, 15, 16, 17, 18, 19, 20]
