# Supplementary material for: Unforgettable: Optogenetic Stimulation of Prelimbic Pyramidal Neurons Maintains Fear Memories by Modulating Amygdala Pyramidal Neuron Transcriptome
Source: Preprints.org preprint supplement (doi:10.20944/preprints202012.0252.v1), 2020-12-10
Supplement: Supplementary file 1 [file supplementary]

GO: Biological Process  
Comparison between OPTO FEAR vs. SHAM FEAR groups

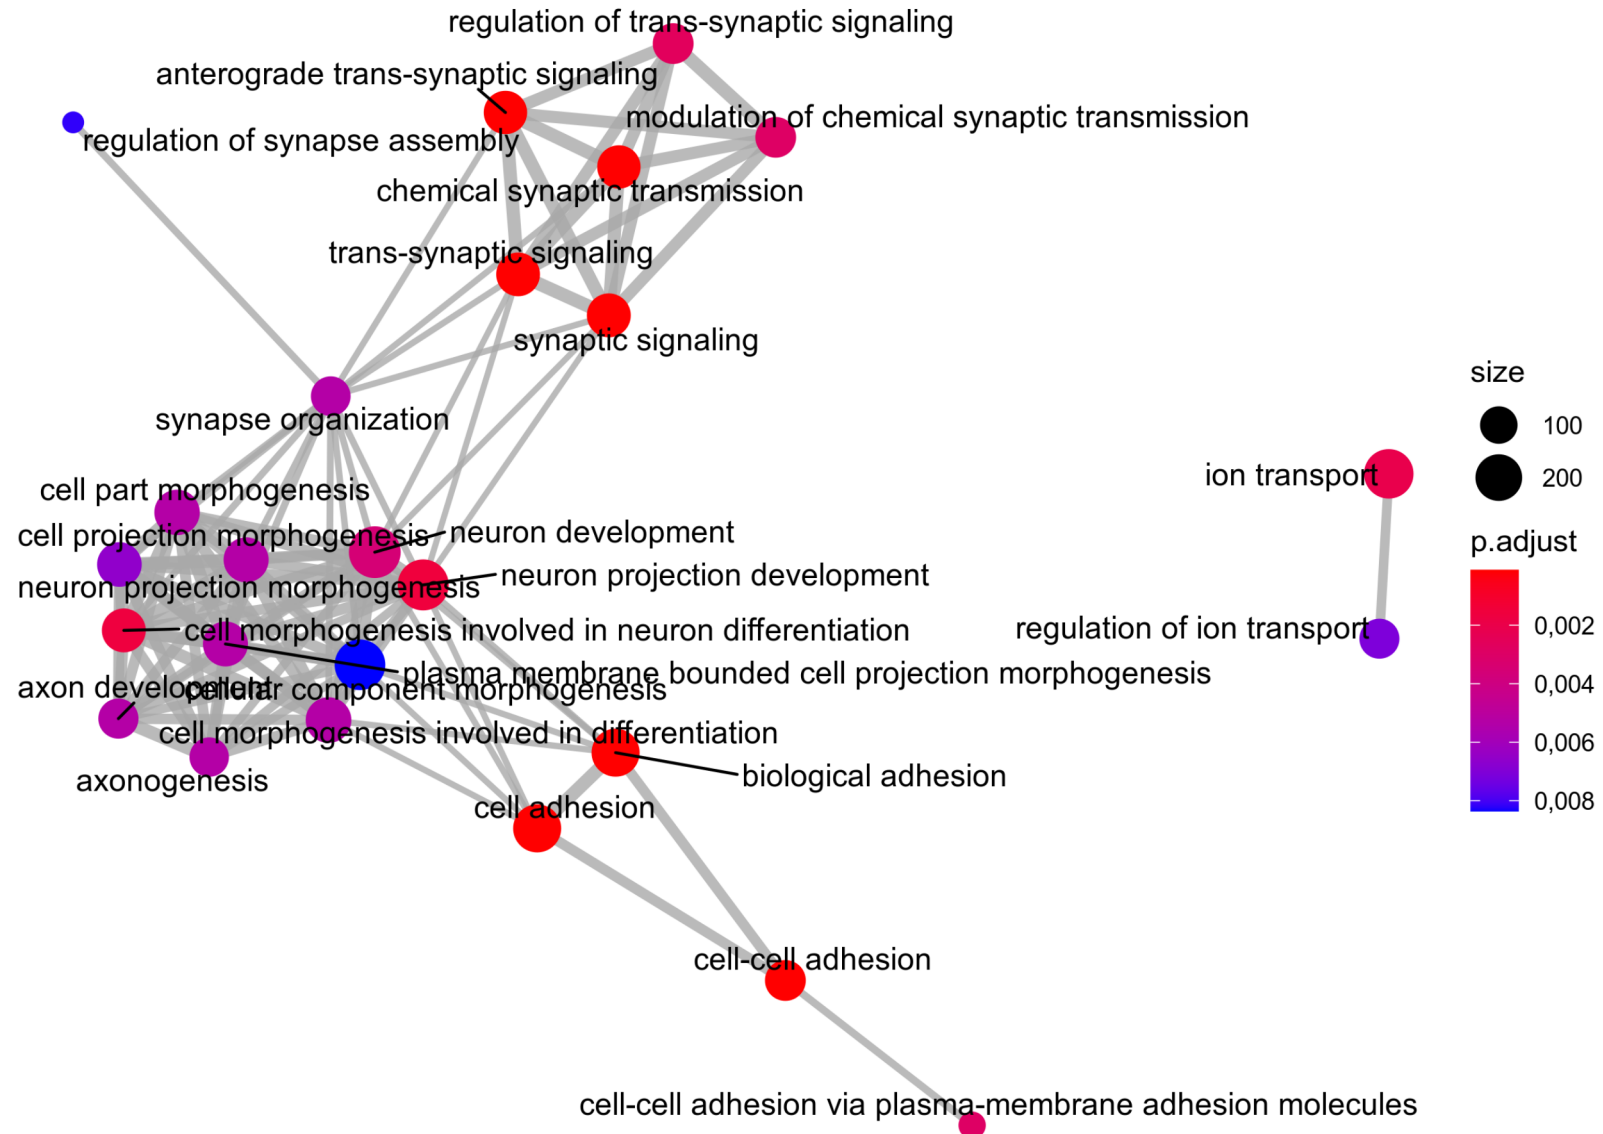

GO: Cellular Component

Comparison between OPTO FEAR vs. SHAM FEAR groups

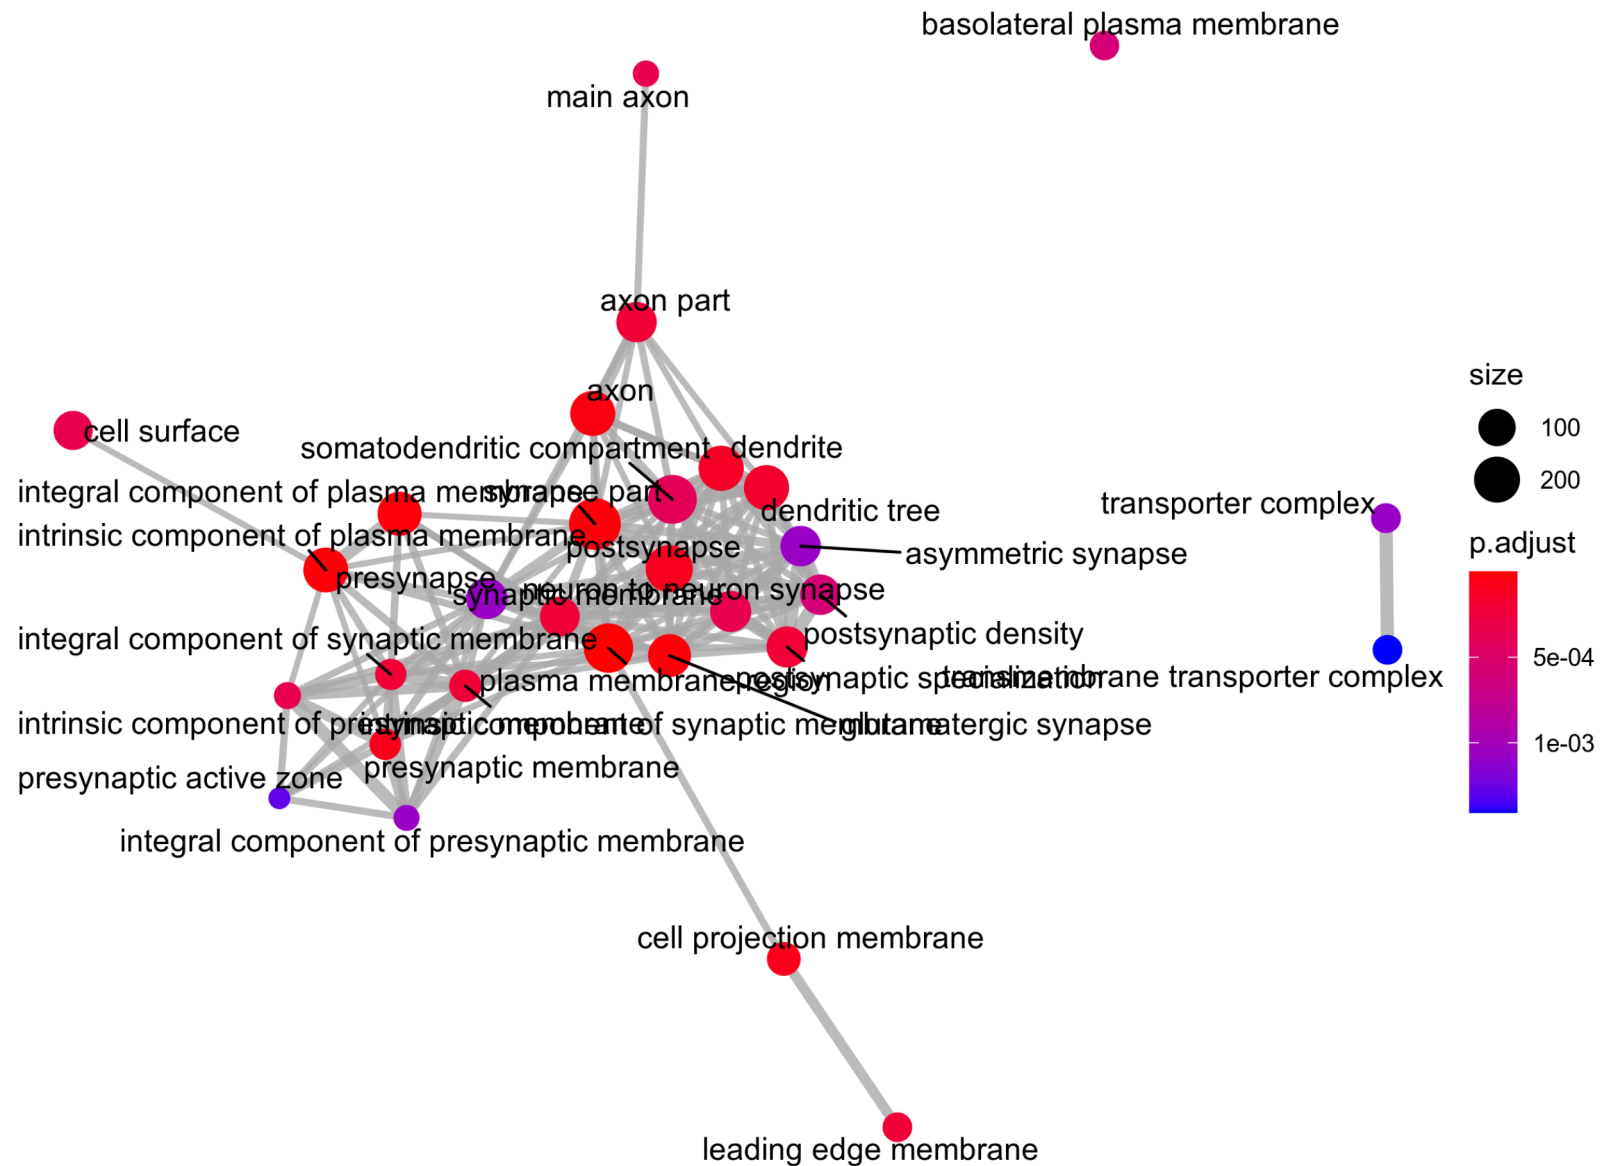

GO: Molecular Function  
Comparison between OPTO FEAR vs. SHAM FEAR groups

transporter activity

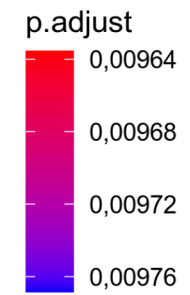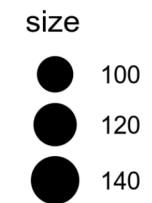

calcium ion binding

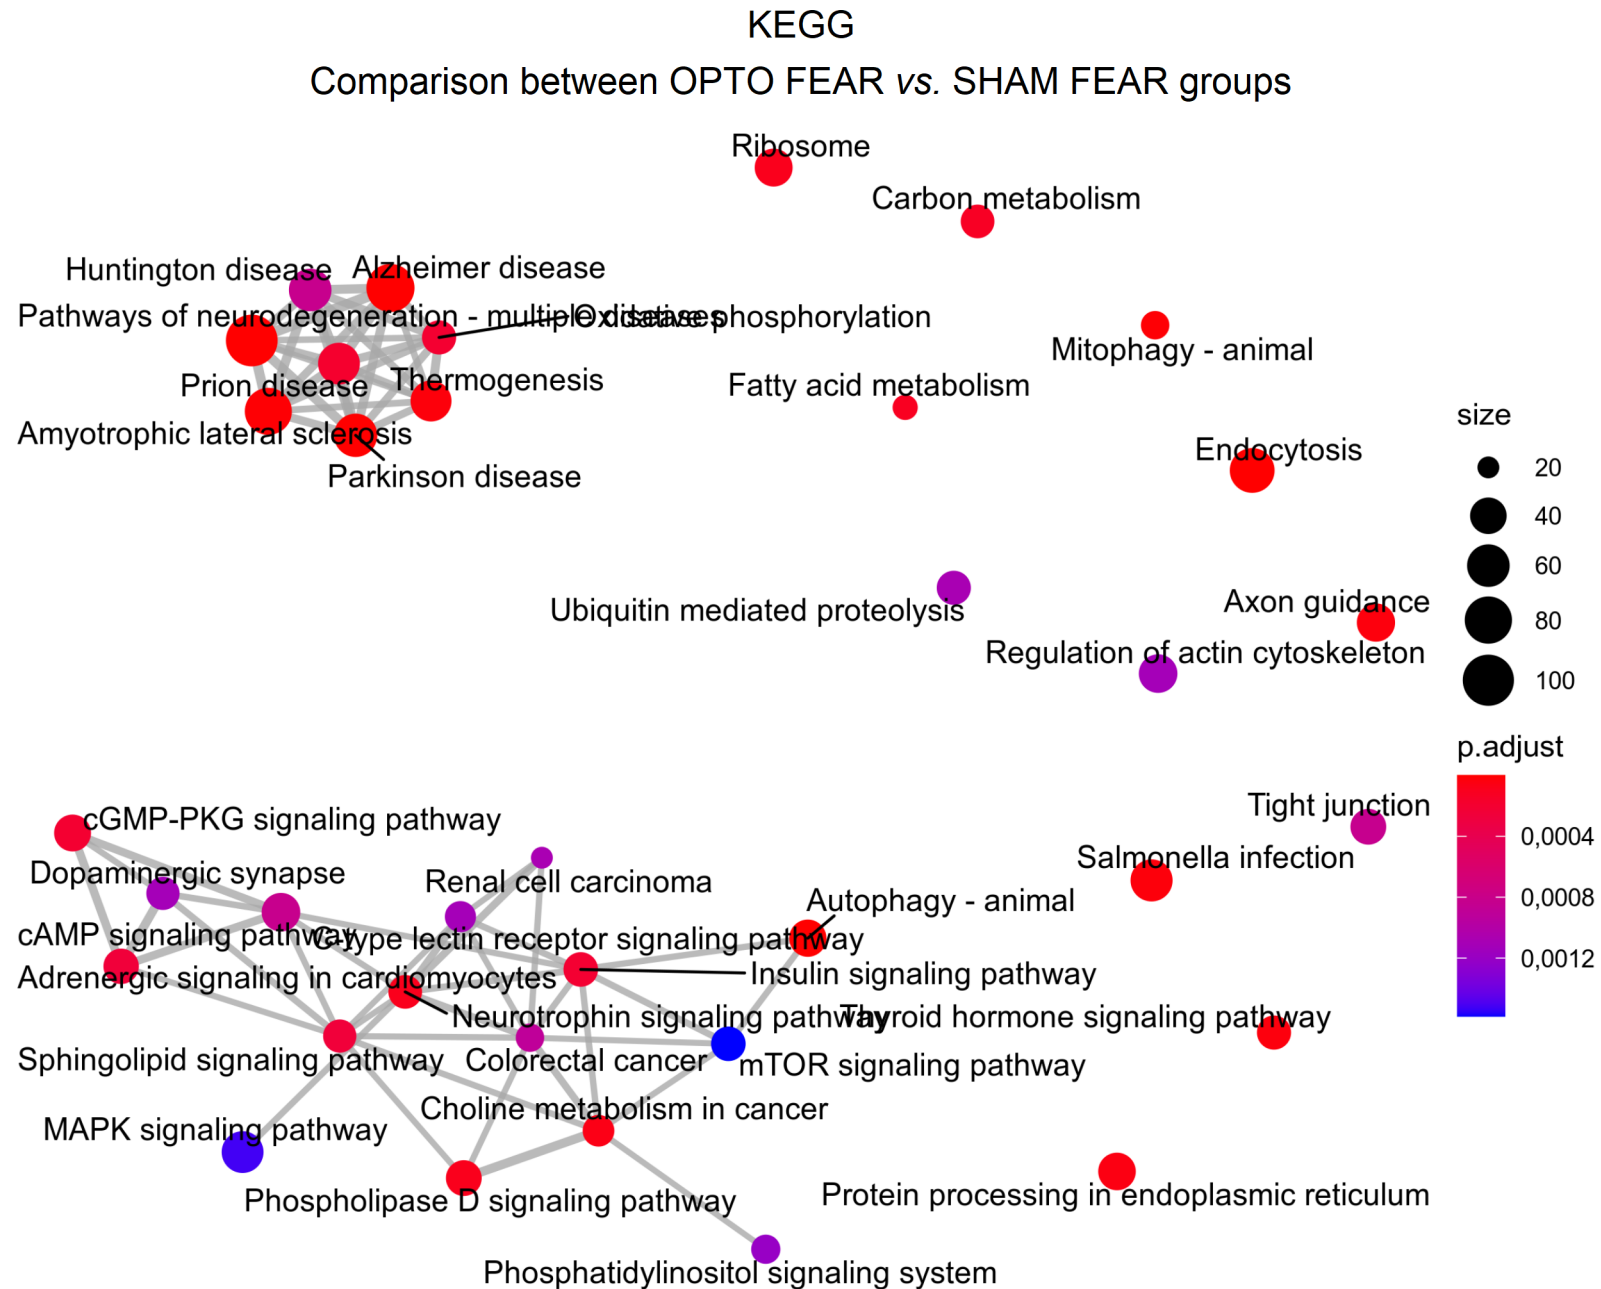

# KEGG

Comparison between OPTO NOT FEAR vs. SHAM NOT FEAR groups

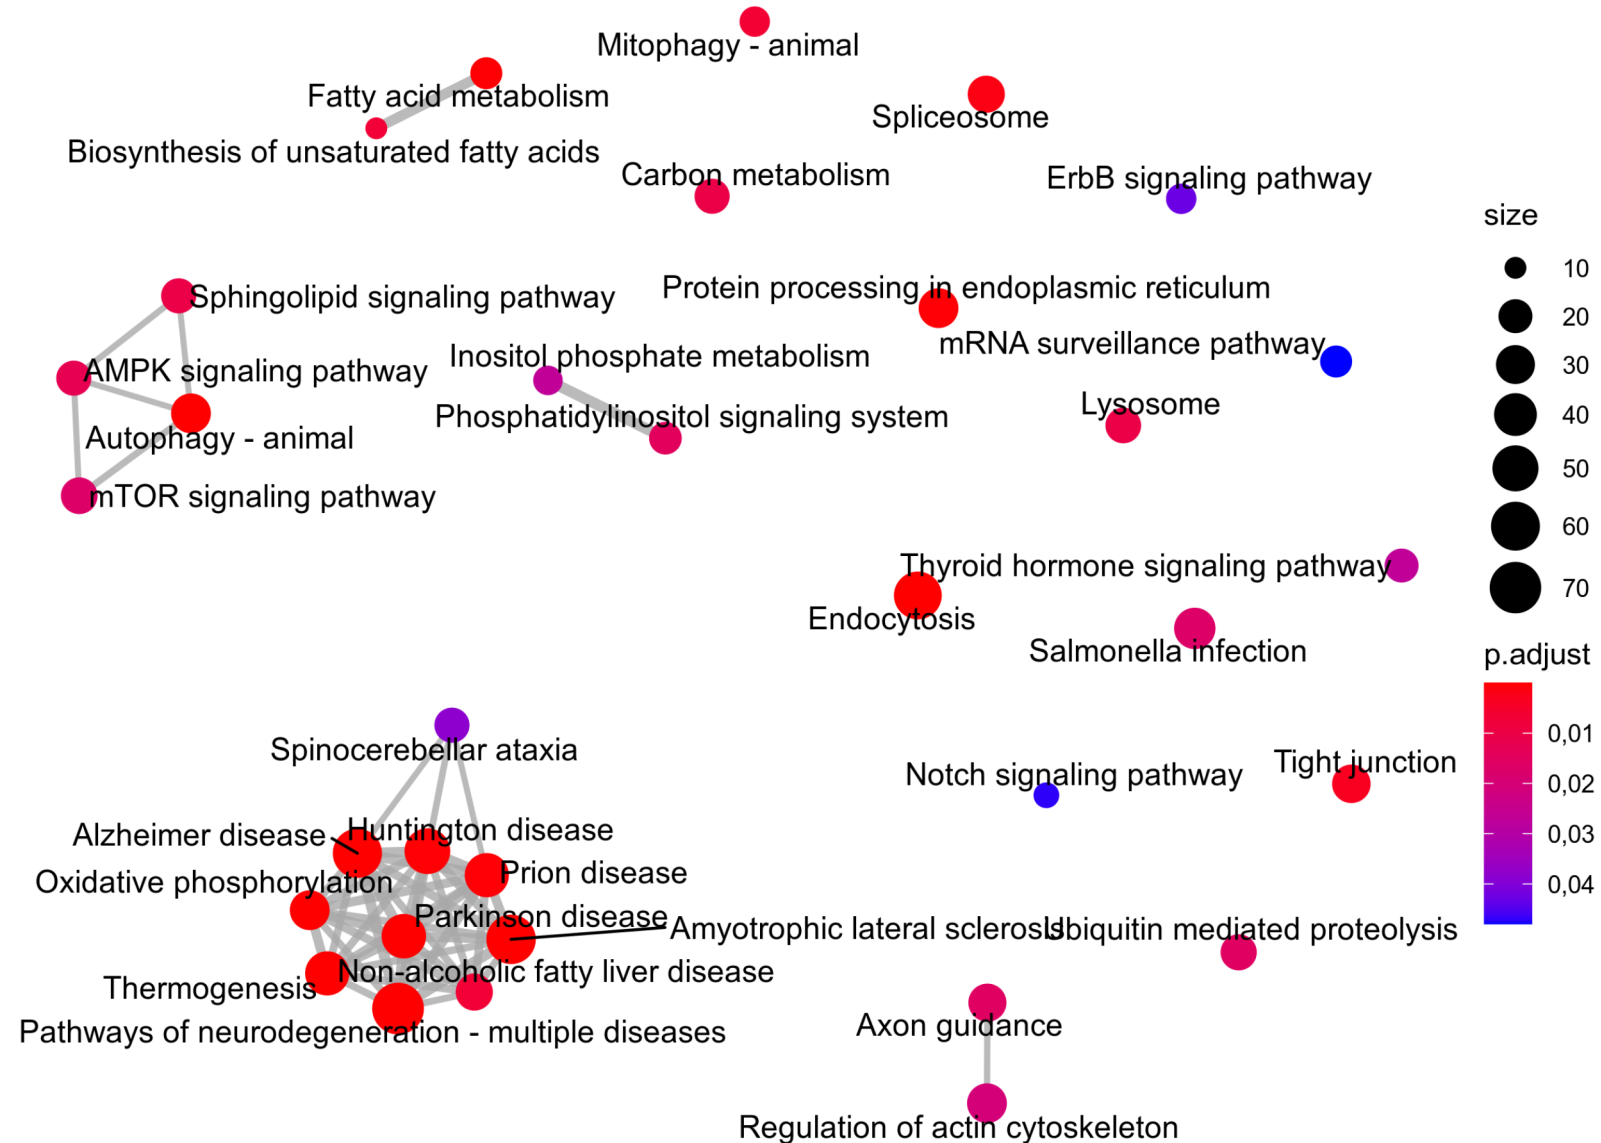

# KEGG

## Comparison between OPTO FEAR vs. OPTO NOT FEAR groups

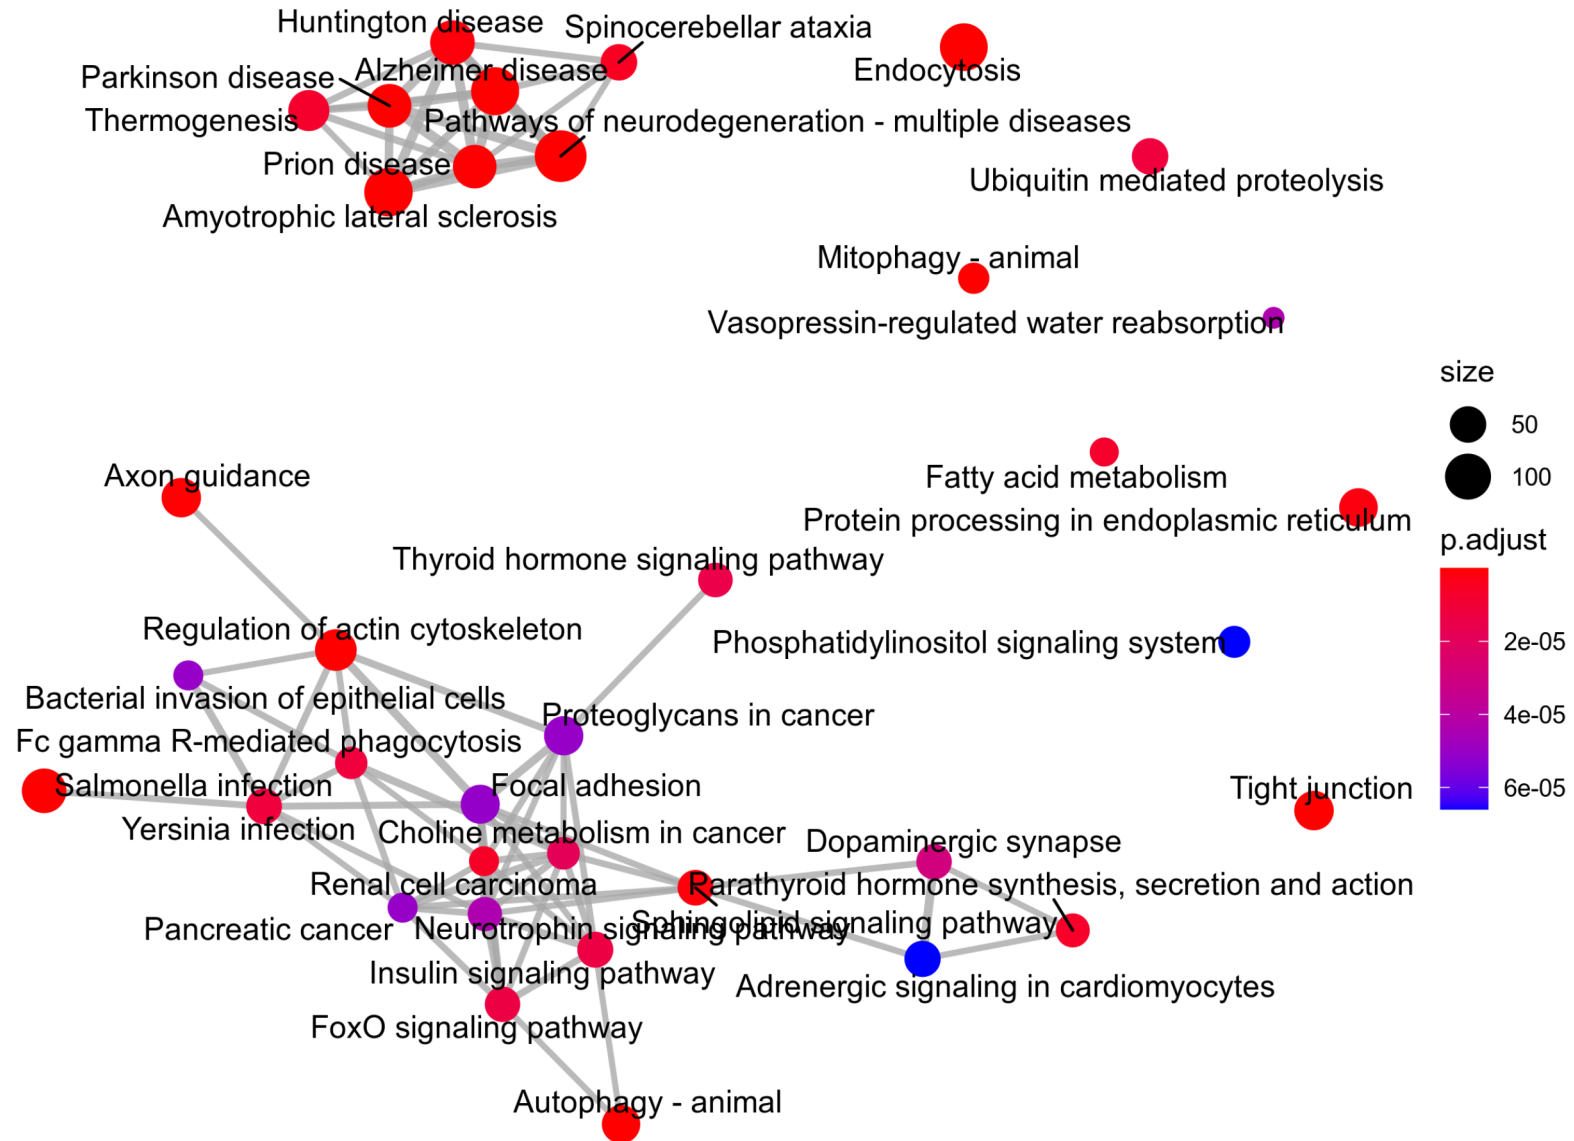

GO: Biological Process  
Comparison between SHAM FEAR vs. SHAM NOT FEAR groups

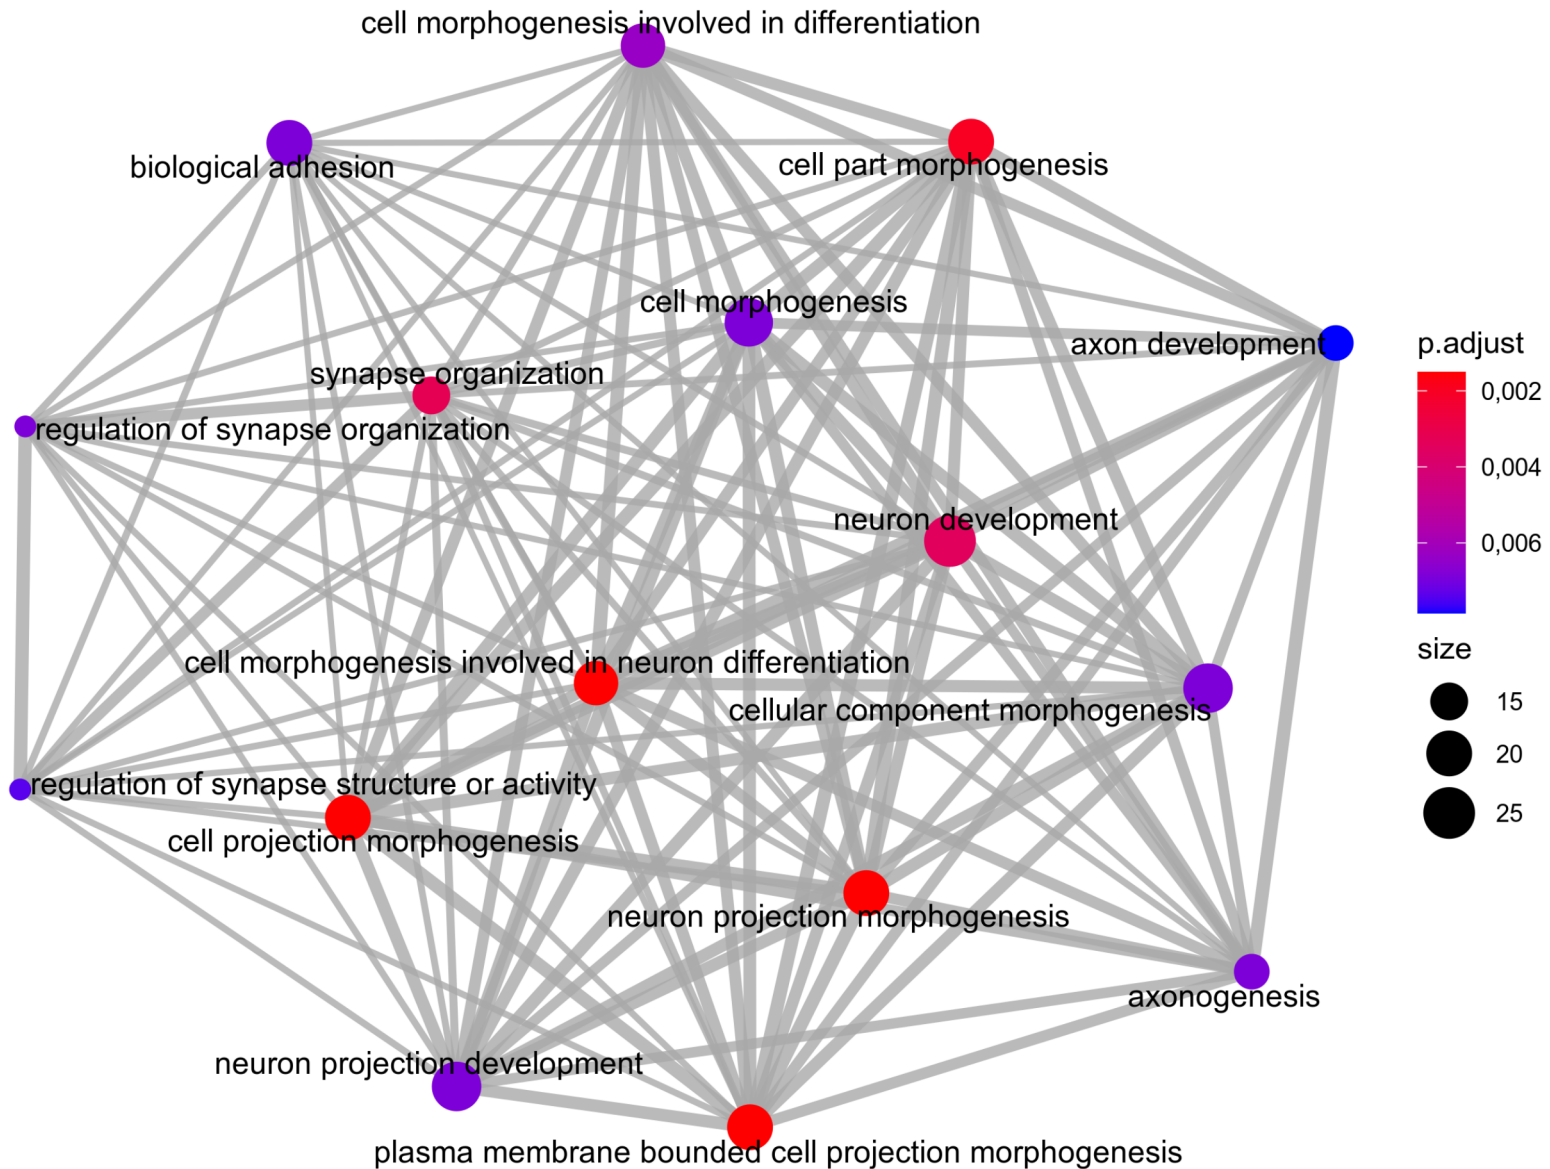



GO: Cellular Component  
Comparison between SHAM FEAR vs. SHAM NOT FEAR groups

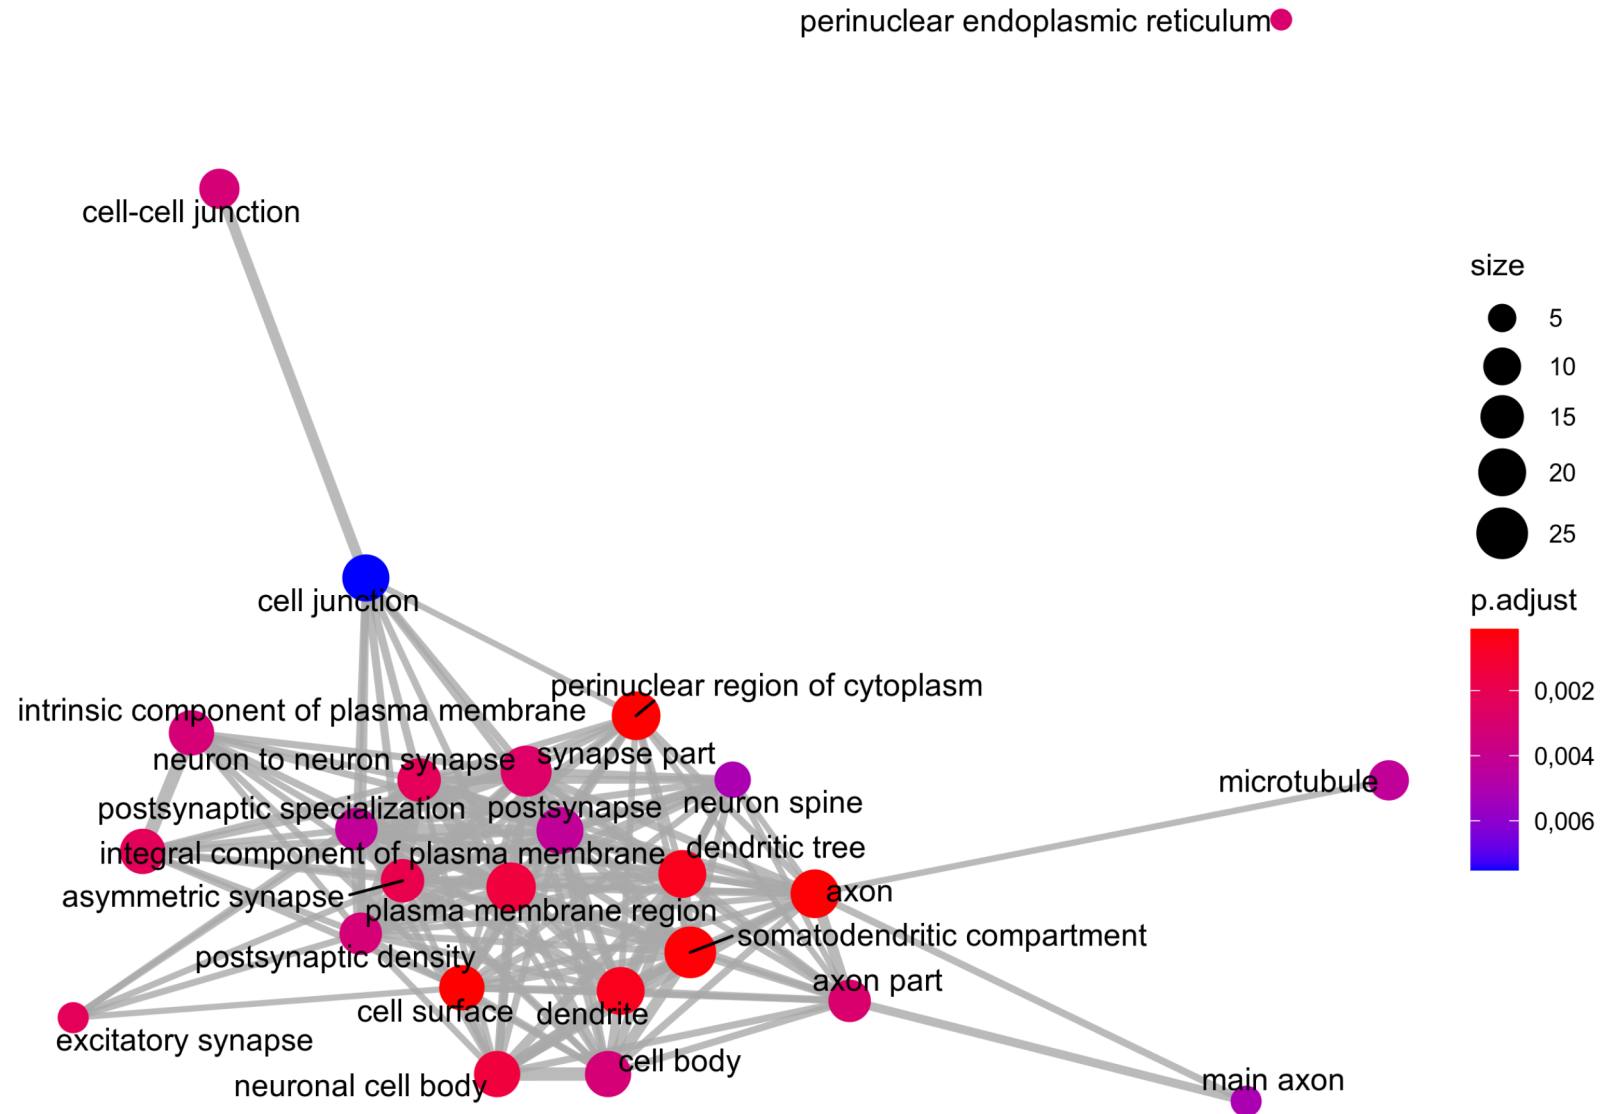



# KEGG

Comparison between SHAM FEAR vs. SHAM NOT FEAR groups

cAMP signaling pathway

size

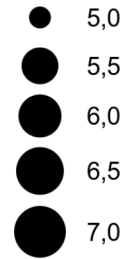

p.adjust

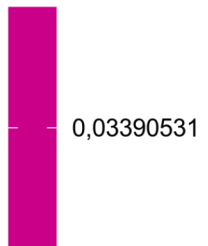

Prostate cancer
